# Supplementary material for: Ecological drivers and habitat associations of estuarine bivalves
Source: PeerJ. 2015 Nov 12;3:e1348. doi: 10.7717/peerj.1348 (PMC4647571; doi:10.7717/peerj.1348)
Supplement: Supplemental Information 1 [file peerj-03-1348-s001.xls]

## Sheet: Sheet1
Combined SMY	Year	Month	Station	Rep	Habitat	Outflow	Depth	Turbidity	Secchi	Surface temperature	Surface oxygen	Surface salinity	Surface pH	Bottom temperature	Bottom oxygen	Bottom salinity	Bottom pH	H2S	Air temp	Annual Avgsize		Anadara floridana	Anadara sp.	Anadara transversa	Arcidae	Glycymeris sp.	Limidae	Caryocorbula sp.	Corbula caribaea	Corbula chittyana	Corbula contracta	Corbula sp.	Corbula swiftiana	Corbulidae	Varicorbula sp.	Sphenia antillensis	Sphenia sp.	Cyrtopleura Costata	Grippina sp.	Mytilidae	Amygdalum papyrium	Brachidontes domingensis	Brachidontes exustus	Lioberus castaneus	Modiolus americanus	Modiolus modiolus	Musculus lateralis	Brachidontes sp.	Nuculana acuta
M02Apr2007	2007	Apr	M02	1	Estuarine	1	1.1	3.5	9.9	24.4	4.61	20.5	7.5	24.4	4.35	21.1	7.47	0	23	192.6	M02Apr2007	0	0	0	0	0	0	0	0	0	0	0	0	0	0	0	0	0	0	0	0	0	0	0	0	0	0	0	0
M02Apr2007	2007	Apr	M02	2	Estuarine	1	1.1	3.5	9.9	24.4	4.61	20.5	7.5	24.4	4.35	21.1	7.47	0	23	192.6	M02Apr2007	0	0	0	0	0	0	0	0	0	0	0	0	0	0	0	0	0	0	0	0	0	0	0	0	0	0	0	0
M02Apr2007	2007	Apr	M02	3	Estuarine	1	1.1	3.5	9.9	24.4	4.61	20.5	7.5	24.4	4.35	21.1	7.47	0	23	192.6	M02Apr2007	0	0	0	0	0	0	0	0	0	0	0	0	0	0	0	0	0	0	0	0	0	0	0	0	0	0	0	0
M03Apr2007	2007	Apr	M03	1	Estuarine	1	2.8	2.51	1.5	24.5	6.99	23.99	7.49	22.7	5.91	26.26	7.23	1	26.7	274.057	M03Apr2007	0	0	0	0	0	0	0	0	0	0	0	0	0	0	0	0	0	0	0	0	0	0	0	0	0	0	0	0
M03Apr2007	2007	Apr	M03	2	Estuarine	1	2.8	2.51	1.5	24.5	6.99	23.99	7.49	22.7	5.91	26.26	7.23	1	26.7	274.057	M03Apr2007	0	0	0	0	0	0	0	0	0	0	0	0	0	0	0	0	0	0	0	0	0	0	0	0	0	0	0	0
M03Apr2007	2007	Apr	M03	3	Estuarine	1	2.8	2.51	1.5	24.5	6.99	23.99	7.49	22.7	5.91	26.26	7.23	1	26.7	274.057	M03Apr2007	0	0	0	0	0	0	0	0	0	0	0	0	0	0	0	0	0	0	0	0	0	0	0	0	0	0	0	0
M04Apr2007	2007	Apr	M04	1	Estuarine	1	1.5	4.97	0.9	23.97	5.67	23.04	7.7	22.9	5.17	27.25	7.47	0	26.5	294.824	M04Apr2007	0	0	0	0	0	0	0	0	0	0	0	0	0	0	0	0	0	0	0	0	0	0	0	0	0	0	0	0
M04Apr2007	2007	Apr	M04	2	Estuarine	1	1.5	4.97	0.9	23.97	5.67	23.04	7.7	22.9	5.17	27.25	7.47	0	26.5	294.824	M04Apr2007	0	0	0	0	0	0	0	0	0	0	0	0	0	0	0	0	0	0	0	0	0	0	0	0	0	0	0	0
M04Apr2007	2007	Apr	M04	3	Estuarine	1	1.5	4.97	0.9	23.97	5.67	23.04	7.7	22.9	5.17	27.25	7.47	0	26.5	294.824	M04Apr2007	0	0	0	0	0	0	0	0	0	0	0	0	0	0	0	0	0	0	0	0	0	0	0	0	0	0	0	0
M05Apr2007	2007	Apr	M05	1	Estuarine	1	2.1	1.98	1.7	23.1	5.82	26.6	7.4	22.7	5.05	30.4	6.99	0	26	205.9	M05Apr2007	0	0	0	0	0	0	0	0	0	0	0	0	0	0	0	0	0	0	0	0	0	0	0	0	0	0	0	0
M05Apr2007	2007	Apr	M05	2	Estuarine	1	2.1	1.98	1.7	23.1	5.82	26.6	7.4	22.7	5.05	30.4	6.99	0	26	205.9	M05Apr2007	0	0	0	0	0	0	0	0	0	0	0	0	0	0	0	0	0	0	0	0	0	0	0	0	0	0	0	0
M05Apr2007	2007	Apr	M05	3	Estuarine	1	2.1	1.98	1.7	23.1	5.82	26.6	7.4	22.7	5.05	30.4	6.99	0	26	205.9	M05Apr2007	0	0	0	0	0	0	0	0	0	0	0	0	0	0	0	0	0	0	0	0	0	0	0	0	0	0	0	0
M06Apr2007	2007	Apr	M06	1	Estuarine	1	2.5	2.03	1.8	23.07	5.92	29.7	7.73	22.4	5.58	32.8	7.17	0	24.8	209.514	M06Apr2007	0	0	0	0	0	0	0	0	0	0	0	0	0	0	0	0	0	0	0	0	0	0	0	0	0	0	0	0
M06Apr2007	2007	Apr	M06	2	Estuarine	1	2.5	2.03	1.8	23.07	5.92	29.7	7.73	22.4	5.58	32.8	7.17	0	24.8	209.514	M06Apr2007	0	0	0	0	0	0	0	0	0	0	0	0	0	0	0	0	0	0	0	0	0	0	0	0	0	0	0	0
M06Apr2007	2007	Apr	M06	3	Estuarine	1	2.5	2.03	1.8	23.07	5.92	29.7	7.73	22.4	5.58	32.8	7.17	0	24.8	209.514	M06Apr2007	0	0	0	0	0	0	0	0	0	0	0	0	0	0	0	0	0	0	0	0	0	0	0	0	0	0	0	0
M07Apr2007	2007	Apr	M07	1	Saline	1	2.1	6.87	1.2	22.6	5.83	34.5	7.82	22.6	5.76	35.8	7.86	0	25	85.2171	M07Apr2007	0	0	0	0	0	0	0	0	0	0	0	0	0	0	0	0	0	0	0	0	0	0	0	0	0	0	0	0
M07Apr2007	2007	Apr	M07	2	Saline	1	2.1	6.87	1.2	22.6	5.83	34.5	7.82	22.6	5.76	35.8	7.86	0	25	85.2171	M07Apr2007	0	0	0	0	0	0	0	0	0	0	0	0	0	0	3	0	0	0	0	0	0	0	0	0	0	0	0	0
M07Apr2007	2007	Apr	M07	3	Saline	1	2.1	6.87	1.2	22.6	5.83	34.5	7.82	22.6	5.76	35.8	7.86	0	25	85.2171	M07Apr2007	0	0	0	0	0	0	0	0	0	0	2	0	0	0	0	0	0	0	0	0	0	0	0	0	0	0	0	0
M08Apr2007	2007	Apr	M08	1	Saline	1	1.1	6.96	0.9	22.6	5.14	35.9	7.43	22.6	5.02	35.9	7.48	0	23.1	108.817	M08Apr2007	0	0	0	0	0	0	0	0	0	0	0	0	0	0	0	0	0	0	0	0	0	0	0	0	0	0	0	0
M08Apr2007	2007	Apr	M08	2	Saline	1	1.1	6.96	0.9	22.6	5.14	35.9	7.43	22.6	5.02	35.9	7.48	0	23.1	108.817	M08Apr2007	0	0	0	0	0	0	0	0	0	0	0	0	0	0	0	0	0	0	0	0	0	0	0	0	0	0	0	0
M08Apr2007	2007	Apr	M08	3	Saline	1	1.1	6.96	0.9	22.6	5.14	35.9	7.43	22.6	5.02	35.9	7.48	0	23.1	108.817	M08Apr2007	0	0	0	0	0	0	0	0	0	0	0	0	0	0	0	0	0	0	0	0	0	0	0	0	0	0	0	0
M09Apr2007	2007	Apr	M09	1	Saline	1	1.4	3.7	9.9	22.6	5.64	36.6	7.84	22.4	5.73	36.6	7.75	0	24.4	178.814	M09Apr2007	0	0	0	0	0	0	0	0	0	0	1	0	0	0	0	0	0	0	0	0	0	0	0	0	0	0	0	0
M09Apr2007	2007	Apr	M09	2	Saline	1	1.4	3.7	9.9	22.6	5.64	36.6	7.84	22.4	5.73	36.6	7.75	0	24.4	178.814	M09Apr2007	0	0	0	0	0	0	0	0	0	0	0	0	0	0	0	0	0	0	0	0	0	0	0	0	0	0	0	0
M09Apr2007	2007	Apr	M09	3	Saline	1	1.4	3.7	9.9	22.6	5.64	36.6	7.84	22.4	5.73	36.6	7.75	0	24.4	178.814	M09Apr2007	0	0	0	0	0	0	0	0	0	0	0	0	0	0	0	0	0	0	0	0	0	0	0	0	0	0	0	0
M10Apr2007	2007	Apr	M10	1	Saline	1	1.3	3.93	9.9	24.1	6.11	37.1	7.98	24.1	7.12	37.1	7.95	0	25.9	80.7917	M10Apr2007	0	0	0	0	0	0	0	0	0	0	0	0	0	0	0	0	0	0	0	0	0	0	0	0	0	0	0	0
M10Apr2007	2007	Apr	M10	2	Saline	1	1.3	3.93	9.9	24.1	6.11	37.1	7.98	24.1	7.12	37.1	7.95	0	25.9	80.7917	M10Apr2007	0	0	0	0	0	0	0	0	0	0	0	0	0	0	0	0	0	0	0	0	0	0	0	0	0	0	0	0
M10Apr2007	2007	Apr	M10	3	Saline	1	1.3	3.93	9.9	24.1	6.11	37.1	7.98	24.1	7.12	37.1	7.95	0	25.9	80.7917	M10Apr2007	0	0	0	0	0	0	0	0	0	0	1	0	0	0	0	0	0	0	0	0	0	0	0	0	0	0	0	0
M11Apr2007	2007	Apr	M11	1	Saline	1	1.7	1.96	9.9	23.9	6.51	36.3	7.98	23.9	6.59	36.3	7.94	0	28.1	79.315	M11Apr2007	0	0	0	0	0	0	0	0	0	0	0	0	0	0	0	0	0	0	0	0	0	0	0	0	0	0	0	0
M11Apr2007	2007	Apr	M11	2	Saline	1	1.7	1.96	9.9	23.9	6.51	36.3	7.98	23.9	6.59	36.3	7.94	0	28.1	79.315	M11Apr2007	0	0	0	0	0	0	0	0	0	0	0	0	0	0	0	0	0	0	0	0	0	0	0	0	0	0	0	0
M11Apr2007	2007	Apr	M11	3	Saline	1	1.7	1.96	9.9	23.9	6.51	36.3	7.98	23.9	6.59	36.3	7.94	0	28.1	79.315	M11Apr2007	0	0	0	0	0	0	0	0	0	1	0	0	0	0	0	0	0	0	0	0	0	0	0	0	0	0	0	0
M12Apr2007	2007	Apr	M12	1	Saline	1	1.4	4.27	9.9	23.9	6.12	35.5	8.03	23.9	6.15	35.4	8	0	25	165.017	M12Apr2007	0	0	0	0	0	0	0	0	0	0	0	0	0	0	0	0	0	0	0	0	0	0	0	0	0	0	0	0
M12Apr2007	2007	Apr	M12	2	Saline	1	1.4	4.27	9.9	23.9	6.12	35.5	8.03	23.9	6.15	35.4	8	0	25	165.017	M12Apr2007	0	0	0	0	0	0	0	0	0	0	0	0	0	0	0	0	0	0	0	0	0	0	0	0	0	0	0	0
M12Apr2007	2007	Apr	M12	3	Saline	1	1.4	4.27	9.9	23.9	6.12	35.5	8.03	23.9	6.15	35.4	8	0	25	165.017	M12Apr2007	0	0	0	0	0	0	0	0	0	1	0	0	0	0	1	0	0	0	0	1	0	0	0	0	0	0	0	0
M13Apr2007	2007	Apr	M13	1	Saline	1	0.9	2.29	9.9	24.2	6.6	35.1	8.1	24.2	6.43	35.1	8.03	0	24.6	183.167	M13Apr2007	0	0	0	0	0	0	0	0	0	0	0	0	0	0	0	0	0	0	0	0	0	0	0	0	0	0	0	0
M13Apr2007	2007	Apr	M13	2	Saline	1	0.9	2.29	9.9	24.2	6.6	35.1	8.1	24.2	6.43	35.1	8.03	0	24.6	183.167	M13Apr2007	0	0	0	0	0	0	0	0	0	0	0	0	0	0	0	0	0	0	0	0	0	1	0	0	0	0	0	0
M13Apr2007	2007	Apr	M13	3	Saline	1	0.9	2.29	9.9	24.2	6.6	35.1	8.1	24.2	6.43	35.1	8.03	0	24.6	183.167	M13Apr2007	0	0	0	0	0	0	0	0	0	0	0	0	0	0	0	0	0	0	0	0	0	0	0	0	0	0	0	0
M01Jul2007	2007	Jul	M01	1	Fresh	1	1.5	5.5	1	27.86	3.55	0.92	7.04	27.84	3.46	0.92	7.08	1	30	114	M01Jul2007	0	0	0	0	0	0	0	0	0	0	0	0	0	0	0	0	0	0	0	0	0	0	0	0	0	0	0	0
M01Jul2007	2007	Jul	M01	2	Fresh	1	1.5	5.5	1	27.86	3.55	0.92	7.04	27.84	3.46	0.92	7.08	1	30	114	M01Jul2007	0	0	0	0	0	0	0	0	0	0	0	0	0	0	0	0	0	0	0	0	0	0	0	0	0	0	0	0
M01Jul2007	2007	Jul	M01	3	Fresh	1	1.5	5.5	1	27.86	3.55	0.92	7.04	27.84	3.46	0.92	7.08	1	30	114	M01Jul2007	0	0	0	0	0	0	0	0	0	0	0	0	0	0	0	0	0	0	0	0	0	0	0	0	0	0	0	0
M02Jul2007	2007	Jul	M02	1	Estuarine	1	2	7	0.8	28.2	3.12	2.36	7.38	28.21	3	2.41	7.19	1	27	192.6	M02Jul2007	0	0	0	0	0	0	0	0	0	0	0	0	0	0	0	0	0	0	0	8	0	0	0	0	0	0	0	0
M02Jul2007	2007	Jul	M02	2	Estuarine	1	2	7	0.8	28.2	3.12	2.36	7.38	28.21	3	2.41	7.19	1	27	192.6	M02Jul2007	0	0	0	0	0	0	0	0	0	0	0	0	0	0	0	0	0	0	0	8	0	0	0	0	0	0	0	0
M02Jul2007	2007	Jul	M02	3	Estuarine	1	2	7	0.8	28.2	3.12	2.36	7.38	28.21	3	2.41	7.19	1	27	192.6	M02Jul2007	0	0	0	0	0	0	0	0	0	0	0	0	0	0	0	0	0	0	0	0	0	0	0	0	0	0	0	0
M03Jul2007	2007	Jul	M03	1	Estuarine	1	2.9	3.93	1.1	29.36	5.56	12.14	7.51	29.49	0.61	19.47	6.83	1	29.3	274.057	M03Jul2007	0	0	0	0	0	0	0	0	0	0	0	0	0	0	0	0	0	0	0	0	0	0	0	0	0	0	0	0
M03Jul2007	2007	Jul	M03	2	Estuarine	1	2.9	3.93	1.1	29.36	5.56	12.14	7.51	29.49	0.61	19.47	6.83	1	29.3	274.057	M03Jul2007	0	0	0	0	0	0	0	0	0	0	0	0	0	0	0	0	0	0	0	0	0	0	0	0	0	0	0	0
M03Jul2007	2007	Jul	M03	3	Estuarine	1	2.9	3.93	1.1	29.36	5.56	12.14	7.51	29.49	0.61	19.47	6.83	1	29.3	274.057	M03Jul2007	0	0	0	0	0	0	0	0	0	0	0	0	0	0	0	0	0	0	0	0	0	0	0	0	0	0	0	0
M04Jul2007	2007	Jul	M04	1	Estuarine	1	2	5.32	0.7	29.51	6.53	16.2	7.63	29.43	3.51	18.64	6.79	0	30.3	294.824	M04Jul2007	0	0	0	0	0	0	0	0	0	0	0	0	0	0	0	0	0	0	0	0	0	0	0	0	0	0	0	0
M04Jul2007	2007	Jul	M04	2	Estuarine	1	2	5.32	0.7	29.51	6.53	16.2	7.63	29.43	3.51	18.64	6.79	0	30.3	294.824	M04Jul2007	0	0	0	0	0	0	0	0	0	0	0	0	0	0	0	0	0	0	0	0	0	0	0	0	0	0	0	0
M04Jul2007	2007	Jul	M04	3	Estuarine	1	2	5.32	0.7	29.51	6.53	16.2	7.63	29.43	3.51	18.64	6.79	0	30.3	294.824	M04Jul2007	0	0	0	0	0	0	0	0	0	0	0	0	0	0	0	0	0	0	0	0	0	0	0	0	0	0	0	0
M05Jul2007	2007	Jul	M05	1	Estuarine	1	2.2	4.08	1	28.84	5.24	17.12	7.63	29.47	3.05	22.93	7.48	1	29	205.9	M05Jul2007	0	0	0	0	0	0	0	0	0	0	0	0	0	0	0	0	0	0	0	0	0	0	0	0	0	0	0	0
M05Jul2007	2007	Jul	M05	2	Estuarine	1	2.2	4.08	1	28.84	5.24	17.12	7.63	29.47	3.05	22.93	7.48	1	29	205.9	M05Jul2007	0	0	0	0	0	0	0	0	0	0	0	0	0	0	0	0	0	0	0	0	0	0	0	0	0	0	0	0
M05Jul2007	2007	Jul	M05	3	Estuarine	1	2.2	4.08	1	28.84	5.24	17.12	7.63	29.47	3.05	22.93	7.48	1	29	205.9	M05Jul2007	0	0	0	0	0	0	0	0	0	0	0	0	0	0	0	0	0	0	0	0	0	0	0	0	0	0	0	0
M06Jul2007	2007	Jul	M06	1	Estuarine	1	2.8	4	0.9	28.9	4.98	19.2	7.6	28.9	3.8	25.8	7.27	0	28.2	209.514	M06Jul2007	0	0	0	0	0	0	0	0	0	0	0	0	0	0	0	0	0	0	0	0	0	0	0	0	0	0	0	0
M06Jul2007	2007	Jul	M06	2	Estuarine	1	2.8	4	0.9	28.9	4.98	19.2	7.6	28.9	3.8	25.8	7.27	0	28.2	209.514	M06Jul2007	0	0	0	0	0	0	0	0	0	0	0	0	0	0	0	0	0	0	0	0	0	0	0	0	0	0	0	0
M06Jul2007	2007	Jul	M06	3	Estuarine	1	2.8	4	0.9	28.9	4.98	19.2	7.6	28.9	3.8	25.8	7.27	0	28.2	209.514	M06Jul2007	0	0	0	0	0	0	0	0	0	0	0	0	0	0	0	0	0	0	0	0	0	0	0	0	0	0	0	0
M07Jul2007	2007	Jul	M07	1	Saline	1	2.2	4.47	1.1	28.7	5.1	26.1	7.74	28.4	4.8	28.2	7.63	0	27.5	85.2171	M07Jul2007	0	0	0	0	0	0	0	0	0	0	0	0	0	0	0	0	0	0	0	0	0	0	0	0	0	0	0	0
M07Jul2007	2007	Jul	M07	2	Saline	1	2.2	4.47	1.1	28.7	5.1	26.1	7.74	28.4	4.8	28.2	7.63	0	27.5	85.2171	M07Jul2007	0	0	0	0	0	0	0	0	0	0	0	0	0	0	0	0	0	0	0	0	0	0	0	0	0	0	0	0
M07Jul2007	2007	Jul	M07	3	Saline	1	2.2	4.47	1.1	28.7	5.1	26.1	7.74	28.4	4.8	28.2	7.63	0	27.5	85.2171	M07Jul2007	0	0	0	0	0	0	0	0	0	0	0	0	0	0	0	0	0	0	0	0	0	0	0	0	0	0	0	0
M08Jul2007	2007	Jul	M08	1	Saline	1	0.9	3.5	9.9	28.7	3.9	28.6	7.56	28.7	3.45	29.2	7.63	0	28	108.817	M08Jul2007	0	0	0	0	0	0	0	0	0	0	0	0	0	0	1	0	0	0	0	0	0	0	0	0	0	0	0	0
M08Jul2007	2007	Jul	M08	2	Saline	1	0.9	3.5	9.9	28.7	3.9	28.6	7.56	28.7	3.45	29.2	7.63	0	28	108.817	M08Jul2007	0	0	0	0	0	0	0	0	0	0	0	0	0	0	0	0	0	0	0	0	0	0	0	0	0	0	0	2
M08Jul2007	2007	Jul	M08	3	Saline	1	0.9	3.5	9.9	28.7	3.9	28.6	7.56	28.7	3.45	29.2	7.63	0	28	108.817	M08Jul2007	0	0	0	0	0	0	0	0	0	0	0	0	0	0	0	0	0	0	0	0	0	0	0	0	0	0	0	0
M09Jul2007	2007	Jul	M09	1	Saline	1	1.4	2.91	9.9	28.6	4.8	33.2	7.8	28.7	4.76	33.2	7.79	0	27.8	178.814	M09Jul2007	0	0	0	0	0	0	0	0	0	0	1	0	0	0	0	0	0	0	0	0	0	0	0	0	0	0	0	0
M09Jul2007	2007	Jul	M09	2	Saline	1	1.4	2.91	9.9	28.6	4.8	33.2	7.8	28.7	4.76	33.2	7.79	0	27.8	178.814	M09Jul2007	0	0	0	0	0	0	0	0	0	0	0	0	0	0	0	0	0	0	0	0	0	0	0	0	0	0	0	0
M09Jul2007	2007	Jul	M09	3	Saline	1	1.4	2.91	9.9	28.6	4.8	33.2	7.8	28.7	4.76	33.2	7.79	0	27.8	178.814	M09Jul2007	0	0	0	0	0	0	0	0	0	0	0	0	0	0	0	0	0	0	0	0	0	0	0	0	0	0	0	0
M10Jul2007	2007	Jul	M10	1	Saline	1	1.2	3.45	9.9	28.51	4.56	33.7	7.88	28.52	4.75	33.7	7.77	0	29.7	80.7917	M10Jul2007	0	0	0	0	0	0	0	0	0	0	0	0	0	0	0	0	0	0	0	1	0	0	0	0	0	0	0	0
M10Jul2007	2007	Jul	M10	2	Saline	1	1.2	3.45	9.9	28.51	4.56	33.7	7.88	28.52	4.75	33.7	7.77	0	29.7	80.7917	M10Jul2007	0	0	0	0	0	0	0	0	0	0	0	0	0	0	0	0	0	0	0	1	0	0	0	0	0	0	0	0
M10Jul2007	2007	Jul	M10	3	Saline	1	1.2	3.45	9.9	28.51	4.56	33.7	7.88	28.52	4.75	33.7	7.77	0	29.7	80.7917	M10Jul2007	0	0	0	0	0	0	0	0	0	0	0	0	0	0	0	0	0	0	0	0	0	0	0	0	0	0	0	0
M11Jul2007	2007	Jul	M11	1	Saline	1	1.9	1.89	9.9	28.4	4.52	33.5	7.79	28.4	4.38	33.5	7.68	0	30.2	79.315	M11Jul2007	0	0	0	0	0	0	0	0	0	0	0	0	0	0	0	0	0	0	0	0	0	0	0	0	0	0	0	0
M11Jul2007	2007	Jul	M11	2	Saline	1	1.9	1.89	9.9	28.4	4.52	33.5	7.79	28.4	4.38	33.5	7.68	0	30.2	79.315	M11Jul2007	0	0	0	0	0	0	0	0	0	0	0	0	0	0	0	0	0	0	0	0	0	0	0	0	0	0	0	0
M11Jul2007	2007	Jul	M11	3	Saline	1	1.9	1.89	9.9	28.4	4.52	33.5	7.79	28.4	4.38	33.5	7.68	0	30.2	79.315	M11Jul2007	0	0	0	0	0	0	0	0	0	0	1	0	0	0	0	0	0	0	0	0	0	0	0	0	0	0	0	0
M12Jul2007	2007	Jul	M12	1	Saline	1	1.7	3.78	9.9	28.68	5.35	30.9	7.73	28.45	5.02	33.14	7.71	0	32	165.017	M12Jul2007	0	0	0	0	0	0	0	0	0	0	0	0	0	0	0	0	0	0	0	0	0	0	0	0	0	0	0	0
M12Jul2007	2007	Jul	M12	2	Saline	1	1.7	3.78	9.9	28.68	5.35	30.9	7.73	28.45	5.02	33.14	7.71	0	32	165.017	M12Jul2007	0	1	0	0	0	0	0	0	0	0	0	0	0	0	0	0	0	0	0	0	0	0	0	0	0	0	0	0
M12Jul2007	2007	Jul	M12	3	Saline	1	1.7	3.78	9.9	28.68	5.35	30.9	7.73	28.45	5.02	33.14	7.71	0	32	165.017	M12Jul2007	0	1	0	0	0	0	0	0	0	0	0	0	0	0	0	0	0	0	0	0	0	0	0	0	0	0	0	0
M13Jul2007	2007	Jul	M13	1	Saline	1	0.9	1.58	9.9	28.74	5.32	33.79	7.74	28.73	5.5	33.82	7.77	0	32.3	183.167	M13Jul2007	0	0	0	0	0	0	0	0	0	0	0	0	0	0	0	0	0	0	0	0	0	0	0	0	0	0	0	0
M13Jul2007	2007	Jul	M13	2	Saline	1	0.9	1.58	9.9	28.74	5.32	33.79	7.74	28.73	5.5	33.82	7.77	0	32.3	183.167	M13Jul2007	0	0	0	0	0	0	0	0	0	0	0	0	0	0	0	0	0	0	0	0	0	0	0	0	0	0	0	0
M13Jul2007	2007	Jul	M13	3	Saline	1	0.9	1.58	9.9	28.74	5.32	33.79	7.74	28.73	5.5	33.82	7.77	0	32.3	183.167	M13Jul2007	0	0	0	0	0	0	0	0	0	0	0	0	0	0	1	0	0	0	0	0	0	0	0	0	0	0	0	0
M01Oct2007	2007	Oct	M01	1	Fresh	1	2.1	4.97	0.8	26.32	3.48	0.46	7.26	26.29	3.38	0.46	4.2	1	28.2	114	M01Oct2007	0	0	0	0	0	0	0	0	0	0	0	0	0	0	0	0	0	0	0	0	0	0	0	0	0	0	0	0
M01Oct2007	2007	Oct	M01	2	Fresh	1	2.1	4.97	0.8	26.32	3.48	0.46	7.26	26.29	3.38	0.46	4.2	1	28.2	114	M01Oct2007	0	0	0	0	0	0	0	0	0	0	0	0	0	0	0	0	0	0	0	0	0	0	0	0	0	0	0	0
M01Oct2007	2007	Oct	M01	3	Fresh	1	2.1	4.97	0.8	26.32	3.48	0.46	7.26	26.29	3.38	0.46	4.2	1	28.2	114	M01Oct2007	0	0	0	0	0	0	0	0	0	0	0	0	0	0	0	0	0	0	0	0	0	0	0	0	0	0	0	0
M02Oct2007	2007	Oct	M02	1	Estuarine	1	1.8	3.93	0.8	26.43	3.41	0.43	7.6	26.4	3.37	0.43	7	1	29.8	192.6	M02Oct2007	0	0	0	0	0	0	0	0	0	0	0	0	0	0	0	0	0	0	0	0	0	0	0	0	0	0	0	0
M02Oct2007	2007	Oct	M02	2	Estuarine	1	1.8	3.93	0.8	26.43	3.41	0.43	7.6	26.4	3.37	0.43	7	1	29.8	192.6	M02Oct2007	0	0	0	0	0	0	0	0	0	0	0	0	0	0	0	0	0	0	0	0	0	0	0	0	0	0	0	0
M02Oct2007	2007	Oct	M02	3	Estuarine	1	1.8	3.93	0.8	26.43	3.41	0.43	7.6	26.4	3.37	0.43	7	1	29.8	192.6	M02Oct2007	0	0	0	0	0	0	0	0	0	0	0	0	0	0	0	0	0	0	0	0	0	0	0	0	0	0	0	0
M05Oct2007	2007	Oct	M05	1	Estuarine	1	2.3	13.3	0.4	25.7	6.73	4.1	7.58	25.6	5.9	5	7.21	1	27.3	205.9	M05Oct2007	0	0	0	0	0	0	0	0	0	0	0	0	0	0	0	0	0	0	0	0	0	0	0	0	0	0	0	0
M05Oct2007	2007	Oct	M05	2	Estuarine	1	2.3	13.3	0.4	25.7	6.73	4.1	7.58	25.6	5.9	5	7.21	1	27.3	205.9	M05Oct2007	0	0	0	0	0	0	0	0	0	0	0	0	0	0	0	0	0	0	0	0	0	0	0	0	0	0	0	0
M05Oct2007	2007	Oct	M05	3	Estuarine	1	2.3	13.3	0.4	25.7	6.73	4.1	7.58	25.6	5.9	5	7.21	1	27.3	205.9	M05Oct2007	0	0	0	0	0	0	0	0	0	0	0	0	0	0	0	0	0	0	0	0	0	0	0	0	0	0	0	0
M06Oct2007	2007	Oct	M06	1	Estuarine	1	2.7	9.09	0.4	25.2	6.29	8.24	7.4	27.1	4.2	26.1	7.75	0	26.8	209.514	M06Oct2007	0	0	0	0	0	0	0	0	0	0	0	0	0	0	0	0	0	0	0	0	0	0	0	0	0	0	0	0
M06Oct2007	2007	Oct	M06	2	Estuarine	1	2.7	9.09	0.4	25.2	6.29	8.24	7.4	27.1	4.2	26.1	7.75	0	26.8	209.514	M06Oct2007	0	0	0	0	0	0	0	0	0	0	0	0	0	0	0	0	0	0	0	0	0	0	0	0	0	0	0	0
M06Oct2007	2007	Oct	M06	3	Estuarine	1	2.7	9.09	0.4	25.2	6.29	8.24	7.4	27.1	4.2	26.1	7.75	0	26.8	209.514	M06Oct2007	0	0	0	0	0	0	0	0	0	0	0	0	0	0	0	0	0	0	0	0	0	0	0	0	0	0	0	0
M08Oct2007	2007	Oct	M08	1	Saline	1	1.4	7.84	0.8	25.9	5.66	25.6	7.67	25.9	5.54	26.6	7.7	0	27	108.817	M08Oct2007	0	0	0	0	0	0	0	0	0	0	2	0	0	0	0	0	0	0	0	0	0	0	0	0	0	0	0	0
M08Oct2007	2007	Oct	M08	2	Saline	1	1.4	7.84	0.8	25.9	5.66	25.6	7.67	25.9	5.54	26.6	7.7	0	27	108.817	M08Oct2007	0	0	0	0	0	0	0	0	0	0	0	0	0	0	0	0	0	0	0	0	0	0	0	0	0	0	0	0
M08Oct2007	2007	Oct	M08	3	Saline	1	1.4	7.84	0.8	25.9	5.66	25.6	7.67	25.9	5.54	26.6	7.7	0	27	108.817	M08Oct2007	0	0	0	0	0	0	0	0	0	0	0	0	0	0	0	0	0	0	0	0	0	0	0	0	0	0	0	0
M09Oct2007	2007	Oct	M09	1	Saline	1	1.7	5.97	1	25.2	5.96	27.9	7.81	25	5.79	28.8	7.81	0	27.3	178.814	M09Oct2007	0	0	0	0	0	0	0	0	0	0	1	0	0	0	0	0	0	0	0	0	0	0	0	0	0	0	0	0
M09Oct2007	2007	Oct	M09	2	Saline	1	1.7	5.97	1	25.2	5.96	27.9	7.81	25	5.79	28.8	7.81	0	27.3	178.814	M09Oct2007	0	0	0	0	0	0	0	0	0	5	0	0	0	0	0	0	0	0	0	0	0	0	0	0	0	0	0	0
M09Oct2007	2007	Oct	M09	3	Saline	1	1.7	5.97	1	25.2	5.96	27.9	7.81	25	5.79	28.8	7.81	0	27.3	178.814	M09Oct2007	0	0	0	0	0	0	0	0	0	1	0	0	0	0	0	0	0	0	0	1	0	0	0	0	0	0	0	0
M10Oct2007	2007	Oct	M10	1	Saline	1	1.4	6.12	1	25.7	5.2	27	7.55	25.78	5.09	27	7.52	0	26.2	80.7917	M10Oct2007	0	0	0	0	0	0	0	0	0	0	0	0	0	0	0	0	0	0	0	0	0	0	0	0	0	0	0	0
M10Oct2007	2007	Oct	M10	2	Saline	1	1.4	6.12	1	25.7	5.2	27	7.55	25.78	5.09	27	7.52	0	26.2	80.7917	M10Oct2007	0	0	0	0	0	0	0	0	0	0	0	0	0	0	0	0	0	0	0	0	0	0	0	0	0	0	0	0
M10Oct2007	2007	Oct	M10	3	Saline	1	1.4	6.12	1	25.7	5.2	27	7.55	25.78	5.09	27	7.52	0	26.2	80.7917	M10Oct2007	0	0	0	0	0	0	0	0	0	0	0	0	0	0	0	0	0	0	0	0	0	0	0	0	0	0	0	0
M11Oct2007	2007	Oct	M11	1	Saline	1	1.9	6.22	1	25.69	5.4	29.27	7.85	25.69	5.3	29.27	7.85	0	26.2	79.315	M11Oct2007	0	0	0	0	0	0	0	0	0	0	0	0	0	0	0	0	0	0	0	0	0	0	0	0	0	0	0	0
M11Oct2007	2007	Oct	M11	2	Saline	1	1.9	6.22	1	25.69	5.4	29.27	7.85	25.69	5.3	29.27	7.85	0	26.2	79.315	M11Oct2007	0	0	0	0	0	0	0	0	0	0	0	0	0	0	0	0	0	0	0	0	0	0	0	0	0	0	0	0
M11Oct2007	2007	Oct	M11	3	Saline	1	1.9	6.22	1	25.69	5.4	29.27	7.85	25.69	5.3	29.27	7.85	0	26.2	79.315	M11Oct2007	0	0	0	0	0	0	0	0	0	0	0	0	0	0	0	0	0	0	0	0	0	0	0	0	0	0	0	0
M12Oct2007	2007	Oct	M12	1	Saline	1	1.9	4.83	1.2	26.44	5.31	25.36	7.76	26.39	5.26	25.45	7.75	0	26.6	165.017	M12Oct2007	0	0	0	0	0	0	0	0	0	0	0	0	0	0	0	0	0	0	0	0	0	0	0	0	0	0	0	0
M12Oct2007	2007	Oct	M12	2	Saline	1	1.9	4.83	1.2	26.44	5.31	25.36	7.76	26.39	5.26	25.45	7.75	0	26.6	165.017	M12Oct2007	0	0	0	0	0	0	0	0	0	0	1	0	0	0	0	0	0	0	0	0	0	0	0	0	0	0	0	0
M12Oct2007	2007	Oct	M12	3	Saline	1	1.9	4.83	1.2	26.44	5.31	25.36	7.76	26.39	5.26	25.45	7.75	0	26.6	165.017	M12Oct2007	0	0	0	0	0	0	0	0	0	0	1	0	0	0	0	0	0	0	0	0	0	0	0	0	0	0	0	0
M13Oct2007	2007	Oct	M13	1	Saline	1	1.6	4.09	1	26.08	4.22	21.98	7.65	26.12	4.41	22.88	7.66	0	26.5	183.167	M13Oct2007	4	0	0	0	0	0	0	0	0	0	0	0	0	0	0	0	0	0	0	1	0	0	0	0	0	0	0	0
M13Oct2007	2007	Oct	M13	2	Saline	1	1.6	4.09	1	26.08	4.22	21.98	7.65	26.12	4.41	22.88	7.66	0	26.5	183.167	M13Oct2007	1	0	0	0	0	0	0	0	0	0	0	0	0	0	0	0	0	0	0	0	0	0	0	0	0	0	0	0
M13Oct2007	2007	Oct	M13	3	Saline	1	1.6	4.09	1	26.08	4.22	21.98	7.65	26.12	4.41	22.88	7.66	0	26.5	183.167	M13Oct2007	1	0	0	0	0	0	0	0	0	0	0	0	0	0	0	0	0	0	0	0	0	0	0	0	0	0	0	0
M14Oct2007	2007	Oct	M14	1	Estuarine	1	1.8	8.07	0.45	25.8	3.79	0.3	6.75	25.8	3.65	0.3	6.34	1	27.5	91.1083	M14Oct2007	0	0	0	0	0	0	0	0	0	0	0	0	0	0	0	0	0	0	0	0	0	0	0	0	0	0	0	0
M14Oct2007	2007	Oct	M14	2	Estuarine	1	1.8	8.07	0.45	25.8	3.79	0.3	6.75	25.8	3.65	0.3	6.34	1	27.5	91.1083	M14Oct2007	0	0	0	0	0	0	0	0	0	0	0	0	0	0	0	0	0	0	0	0	0	0	0	0	0	0	0	0
M14Oct2007	2007	Oct	M14	3	Estuarine	1	1.8	8.07	0.45	25.8	3.79	0.3	6.75	25.8	3.65	0.3	6.34	1	27.5	91.1083	M14Oct2007	0	0	0	0	0	0	0	0	0	0	0	0	0	0	0	0	0	0	0	0	0	0	0	0	0	0	0	0
M02Jan2008	2008	Jan	M02	1	Estuarine	1	1.8	3.02	9.9	17.17	6.9	8.12	7.74	17.21	6.75	8.33	7.75	1	4.2	192.6	M02Jan2008	0	0	0	0	0	0	0	0	0	0	0	0	0	0	0	0	0	0	0	0	0	0	0	0	0	0	0	0
M02Jan2008	2008	Jan	M02	2	Estuarine	1	1.8	3.02	9.9	17.17	6.9	8.12	7.74	17.21	6.75	8.33	7.75	1	4.2	192.6	M02Jan2008	0	0	0	0	0	0	0	0	0	0	0	0	0	0	0	0	0	0	0	0	0	0	0	0	0	0	0	0
M02Jan2008	2008	Jan	M02	3	Estuarine	1	1.8	3.02	9.9	17.17	6.9	8.12	7.74	17.21	6.75	8.33	7.75	1	4.2	192.6	M02Jan2008	0	0	0	0	0	0	0	0	0	0	0	0	0	0	0	0	0	0	0	0	0	0	0	0	0	0	0	0
M03Jan2008	2008	Jan	M03	1	Estuarine	1	3	1.57	1.7	18.89	7.88	13.58	8.02	17.55	6.21	16.17	7.81	1	22.7	274.057	M03Jan2008	0	0	0	0	0	0	0	0	0	0	0	0	0	0	0	0	0	0	0	0	0	0	0	0	0	0	0	0
M03Jan2008	2008	Jan	M03	2	Estuarine	1	3	1.57	1.7	18.89	7.88	13.58	8.02	17.55	6.21	16.17	7.81	1	22.7	274.057	M03Jan2008	0	0	0	0	0	0	0	0	0	0	0	0	0	0	0	0	0	0	0	0	0	0	0	0	0	0	0	0
M03Jan2008	2008	Jan	M03	3	Estuarine	1	3	1.57	1.7	18.89	7.88	13.58	8.02	17.55	6.21	16.17	7.81	1	22.7	274.057	M03Jan2008	0	0	0	0	0	0	0	0	0	0	0	0	0	0	0	0	0	0	0	0	0	0	0	0	0	0	0	0
M05Jan2008	2008	Jan	M05	1	Estuarine	1	2.3	3.95	1.5	19.28	7.28	19.25	7.97	18.72	7.17	20.73	8	1	22.4	205.9	M05Jan2008	0	0	0	0	0	0	0	0	0	0	0	0	0	0	0	0	0	0	0	0	0	0	0	0	0	0	0	0
M05Jan2008	2008	Jan	M05	2	Estuarine	1	2.3	3.95	1.5	19.28	7.28	19.25	7.97	18.72	7.17	20.73	8	1	22.4	205.9	M05Jan2008	0	0	0	0	0	0	0	0	0	0	0	0	0	0	0	0	0	0	0	0	0	0	0	0	0	0	0	0
M05Jan2008	2008	Jan	M05	3	Estuarine	1	2.3	3.95	1.5	19.28	7.28	19.25	7.97	18.72	7.17	20.73	8	1	22.4	205.9	M05Jan2008	0	0	0	0	0	0	0	0	0	0	0	0	0	0	0	0	0	0	0	0	0	0	0	0	0	0	0	0
M06Jan2008	2008	Jan	M06	1	Estuarine	1	2.8	2.42	1.4	18.9	7.24	22.46	8.03	19.06	6.77	25.63	8.05	0	22.2	209.514	M06Jan2008	0	0	0	0	0	0	0	0	0	0	0	0	0	0	0	0	0	0	0	0	0	0	0	0	0	0	0	0
M06Jan2008	2008	Jan	M06	2	Estuarine	1	2.8	2.42	1.4	18.9	7.24	22.46	8.03	19.06	6.77	25.63	8.05	0	22.2	209.514	M06Jan2008	0	0	0	0	0	0	0	0	0	0	0	0	0	0	0	0	0	0	0	0	0	0	0	0	0	0	0	0
M06Jan2008	2008	Jan	M06	3	Estuarine	1	2.8	2.42	1.4	18.9	7.24	22.46	8.03	19.06	6.77	25.63	8.05	0	22.2	209.514	M06Jan2008	0	0	0	0	0	0	0	0	0	0	0	0	0	0	0	0	0	0	0	0	0	0	0	0	0	0	0	0
M07Jan2008	2008	Jan	M07	1	Saline	1	2.1	3.65	1.6	22.09	6.54	34.76	8.18	22.23	6.47	35.15	8.19	0	22.8	85.2171	M07Jan2008	0	0	0	0	0	0	0	0	0	0	0	0	0	0	0	0	0	0	0	0	0	0	0	0	0	0	0	0
M07Jan2008	2008	Jan	M07	2	Saline	1	2.1	3.65	1.6	22.09	6.54	34.76	8.18	22.23	6.47	35.15	8.19	0	22.8	85.2171	M07Jan2008	0	1	0	0	0	0	0	0	0	0	0	0	0	0	0	0	0	0	0	0	0	0	0	0	0	0	0	0
M07Jan2008	2008	Jan	M07	3	Saline	1	2.1	3.65	1.6	22.09	6.54	34.76	8.18	22.23	6.47	35.15	8.19	0	22.8	85.2171	M07Jan2008	0	1	0	0	0	0	0	0	0	0	1	0	0	0	0	0	0	0	0	0	0	0	0	0	0	0	0	0
M08Jan2008	2008	Jan	M08	1	Saline	1	1.1	4.69	9.9	20.59	7.01	29.88	8.01	20.57	7.04	29.89	8.02	0	22.8	108.817	M08Jan2008	0	0	0	0	0	0	0	0	0	0	1	0	0	0	0	0	0	0	0	0	0	0	0	0	0	0	0	0
M08Jan2008	2008	Jan	M08	2	Saline	1	1.1	4.69	9.9	20.59	7.01	29.88	8.01	20.57	7.04	29.89	8.02	0	22.8	108.817	M08Jan2008	0	0	0	0	0	0	0	0	0	0	0	0	0	0	0	0	0	0	0	0	0	0	0	0	0	0	0	0
M08Jan2008	2008	Jan	M08	3	Saline	1	1.1	4.69	9.9	20.59	7.01	29.88	8.01	20.57	7.04	29.89	8.02	0	22.8	108.817	M08Jan2008	0	0	0	0	0	0	0	0	0	0	4	0	0	0	0	0	0	0	0	0	0	0	0	0	0	0	0	0
M09Jan2008	2008	Jan	M09	1	Saline	1	1.5	3.76	9.9	20.45	6.55	33.25	8.15	20.86	6.39	33.85	8.16	0	22.3	178.814	M09Jan2008	0	0	0	0	0	0	0	0	0	0	0	0	0	0	0	0	0	0	0	0	0	0	0	0	0	0	0	0
M09Jan2008	2008	Jan	M09	2	Saline	1	1.5	3.76	9.9	20.45	6.55	33.25	8.15	20.86	6.39	33.85	8.16	0	22.3	178.814	M09Jan2008	0	0	0	0	0	0	0	0	0	0	0	0	0	0	0	0	0	0	0	0	0	0	0	0	0	0	0	0
M09Jan2008	2008	Jan	M09	3	Saline	1	1.5	3.76	9.9	20.45	6.55	33.25	8.15	20.86	6.39	33.85	8.16	0	22.3	178.814	M09Jan2008	0	0	0	0	0	0	0	0	0	0	0	0	0	0	0	0	0	0	0	0	0	0	0	0	0	0	0	0
M10Jan2008	2008	Jan	M10	1	Saline	1	1.6	2.12	9.9	17.15	7.22	33.52	8.07	17.17	7.17	33.55	8.09	0	22.3	80.7917	M10Jan2008	0	0	0	0	0	0	0	0	0	0	0	0	0	0	0	0	0	0	0	0	0	0	0	0	0	0	0	0
M10Jan2008	2008	Jan	M10	2	Saline	1	1.6	2.12	9.9	17.15	7.22	33.52	8.07	17.17	7.17	33.55	8.09	0	22.3	80.7917	M10Jan2008	0	0	0	0	0	0	0	0	0	0	0	0	0	0	0	0	0	0	0	0	0	0	0	0	0	0	0	0
M10Jan2008	2008	Jan	M10	3	Saline	1	1.6	2.12	9.9	17.15	7.22	33.52	8.07	17.17	7.17	33.55	8.09	0	22.3	80.7917	M10Jan2008	0	0	0	0	0	0	0	0	0	0	0	0	0	0	0	0	0	0	0	1	0	0	0	0	0	0	0	0
M11Jan2008	2008	Jan	M11	1	Saline	1	2.2	2.93	9.9	17.29	7.63	34.3	8.14	17.25	7.65	34.3	8.16	0	21.5	79.315	M11Jan2008	0	0	0	0	0	0	0	0	0	0	0	0	0	0	0	1	0	0	0	0	0	0	0	0	0	0	0	0
M11Jan2008	2008	Jan	M11	2	Saline	1	2.2	2.93	9.9	17.29	7.63	34.3	8.14	17.25	7.65	34.3	8.16	0	21.5	79.315	M11Jan2008	0	0	0	0	0	0	0	0	0	0	0	0	0	0	0	0	0	0	0	0	0	0	0	0	0	0	0	0
M11Jan2008	2008	Jan	M11	3	Saline	1	2.2	2.93	9.9	17.29	7.63	34.3	8.14	17.25	7.65	34.3	8.16	0	21.5	79.315	M11Jan2008	0	0	0	0	0	0	0	0	0	0	2	0	0	0	0	0	0	0	0	0	0	0	0	0	0	0	0	0
M13Jan2008	2008	Jan	M13	1	Saline	1	1.3	5.04	9.9	16.98	8.17	28.82	8.11	16.98	7.96	28.82	8.12	0	19.2	183.167	M13Jan2008	0	0	0	0	0	0	0	0	0	0	0	0	0	0	0	0	0	0	0	1	0	0	0	0	0	0	0	0
M13Jan2008	2008	Jan	M13	2	Saline	1	1.3	5.04	9.9	16.98	8.17	28.82	8.11	16.98	7.96	28.82	8.12	0	19.2	183.167	M13Jan2008	0	0	0	0	0	0	0	0	0	0	0	0	0	0	0	0	0	0	0	0	0	0	0	0	0	0	0	0
M13Jan2008	2008	Jan	M13	3	Saline	1	1.3	5.04	9.9	16.98	8.17	28.82	8.11	16.98	7.96	28.82	8.12	0	19.2	183.167	M13Jan2008	0	0	0	0	0	0	0	0	0	0	0	0	0	0	0	0	0	0	0	0	0	0	0	0	0	1	0	0
M14Jan2008	2008	Jan	M14	1	Estuarine	1	2.1	4.68	1.1	19.35	6.75	6.6	6.73	18.41	6.57	12.73	7.75	1	23.7	91.1083	M14Jan2008	0	0	0	0	0	0	0	0	0	0	0	0	0	0	0	0	0	0	0	0	0	0	0	0	0	0	0	0
M14Jan2008	2008	Jan	M14	2	Estuarine	1	2.1	4.68	1.1	19.35	6.75	6.6	6.73	18.41	6.57	12.73	7.75	1	23.7	91.1083	M14Jan2008	0	0	0	0	0	0	0	0	0	0	0	0	0	0	0	0	0	0	0	0	0	0	0	0	0	0	0	0
M14Jan2008	2008	Jan	M14	3	Estuarine	1	2.1	4.68	1.1	19.35	6.75	6.6	6.73	18.41	6.57	12.73	7.75	1	23.7	91.1083	M14Jan2008	0	0	0	0	0	0	0	0	0	0	0	0	0	0	0	0	0	0	0	0	0	0	0	0	0	0	0	0
M01Apr2008	2008	Apr	M01	1	Fresh	1	2	7.8	0.6	25.36	5.64	0.53	7.43	24.58	4.62	0.53	7.33	0	27	114	M01Apr2008	0	0	0	0	0	0	0	0	0	0	0	0	0	0	0	0	0	0	0	0	0	0	0	0	0	0	0	0
M01Apr2008	2008	Apr	M01	2	Fresh	1	2	7.8	0.6	25.36	5.64	0.53	7.43	24.58	4.62	0.53	7.33	0	27	114	M01Apr2008	0	0	0	0	0	0	0	0	0	0	0	0	0	0	0	0	0	0	0	0	0	0	0	0	0	0	0	0
M01Apr2008	2008	Apr	M01	3	Fresh	1	2	7.8	0.6	25.36	5.64	0.53	7.43	24.58	4.62	0.53	7.33	0	27	114	M01Apr2008	0	0	0	0	0	0	0	0	0	0	0	0	0	0	0	0	0	0	0	0	0	0	0	0	0	0	0	0
M02Apr2008	2008	Apr	M02	1	Estuarine	1	2	7.1	0.8	26.1	7.31	0.62	7.6	25.71	6.98	0.62	7.54	1	27.2	192.6	M02Apr2008	0	0	0	0	0	0	0	0	0	0	0	0	0	0	0	0	0	0	0	0	0	0	0	0	0	0	0	0
M02Apr2008	2008	Apr	M02	2	Estuarine	1	2	7.1	0.8	26.1	7.31	0.62	7.6	25.71	6.98	0.62	7.54	1	27.2	192.6	M02Apr2008	0	0	0	0	0	0	0	0	0	0	0	0	0	0	0	0	0	0	0	0	0	0	0	0	0	0	0	0
M02Apr2008	2008	Apr	M02	3	Estuarine	1	2	7.1	0.8	26.1	7.31	0.62	7.6	25.71	6.98	0.62	7.54	1	27.2	192.6	M02Apr2008	0	0	0	0	0	0	0	0	0	0	0	0	0	0	0	0	0	0	0	0	0	1	0	0	0	0	0	0
M03Apr2008	2008	Apr	M03	1	Estuarine	1	2.9	3.6	1.3	25.8	7.05	6.13	7.8	26	5.02	16.05	7.75	1	24.9	274.057	M03Apr2008	0	0	0	0	0	0	0	0	0	0	0	0	0	0	0	0	0	0	0	0	0	0	0	0	0	0	0	0
M03Apr2008	2008	Apr	M03	2	Estuarine	1	2.9	3.6	1.3	25.8	7.05	6.13	7.8	26	5.02	16.05	7.75	1	24.9	274.057	M03Apr2008	0	0	0	0	0	0	0	0	0	0	0	0	0	0	0	0	0	0	0	0	0	0	0	0	0	0	0	0
M03Apr2008	2008	Apr	M03	3	Estuarine	1	2.9	3.6	1.3	25.8	7.05	6.13	7.8	26	5.02	16.05	7.75	1	24.9	274.057	M03Apr2008	0	0	0	0	0	0	0	0	0	0	0	0	0	0	0	0	0	0	0	0	0	0	0	0	0	0	0	0
M04Apr2008	2008	Apr	M04	1	Estuarine	1	1.7	5.2	1	25.4	7.06	12.3	7.85	25.6	6.02	14.4	7.79	1	22.6	294.824	M04Apr2008	0	0	0	0	0	0	0	0	0	0	0	0	0	0	0	0	0	0	0	0	0	0	0	0	0	0	0	0
M04Apr2008	2008	Apr	M04	2	Estuarine	1	1.7	5.2	1	25.4	7.06	12.3	7.85	25.6	6.02	14.4	7.79	1	22.6	294.824	M04Apr2008	0	0	0	0	0	0	0	0	0	0	0	0	0	0	0	0	0	0	0	0	0	0	0	0	0	0	0	0
M04Apr2008	2008	Apr	M04	3	Estuarine	1	1.7	5.2	1	25.4	7.06	12.3	7.85	25.6	6.02	14.4	7.79	1	22.6	294.824	M04Apr2008	0	0	0	0	0	0	0	0	0	0	0	0	0	0	0	0	0	0	0	0	0	0	0	0	0	0	0	0
M05Apr2008	2008	Apr	M05	1	Estuarine	1	2.4	4.4	1.3	25.48	7.07	16.5	7.95	25.36	5.26	21.07	7.89	1	24.7	205.9	M05Apr2008	0	0	0	0	0	0	0	0	0	0	0	0	0	0	0	0	0	0	0	0	0	0	0	0	0	0	0	0
M05Apr2008	2008	Apr	M05	2	Estuarine	1	2.4	4.4	1.3	25.48	7.07	16.5	7.95	25.36	5.26	21.07	7.89	1	24.7	205.9	M05Apr2008	0	0	0	0	0	0	0	0	0	0	0	0	0	0	0	0	0	0	0	0	0	0	0	0	0	0	0	0
M05Apr2008	2008	Apr	M05	3	Estuarine	1	2.4	4.4	1.3	25.48	7.07	16.5	7.95	25.36	5.26	21.07	7.89	1	24.7	205.9	M05Apr2008	0	0	0	0	0	0	0	0	0	0	0	0	0	0	0	0	0	0	0	0	0	0	0	0	0	0	0	0
M06Apr2008	2008	Apr	M06	1	Estuarine	1	3.1	3.3	1.5	25.06	7.13	22.09	8.02	24.58	6.76	30.61	8.11	0	24.8	209.514	M06Apr2008	0	0	0	0	0	0	0	0	0	0	0	0	0	0	0	0	0	0	0	0	0	0	0	0	0	0	0	0
M06Apr2008	2008	Apr	M06	2	Estuarine	1	3.1	3.3	1.5	25.06	7.13	22.09	8.02	24.58	6.76	30.61	8.11	0	24.8	209.514	M06Apr2008	0	0	0	0	0	0	0	0	0	0	0	0	0	0	0	0	0	0	0	0	0	0	0	0	0	0	0	0
M06Apr2008	2008	Apr	M06	3	Estuarine	1	3.1	3.3	1.5	25.06	7.13	22.09	8.02	24.58	6.76	30.61	8.11	0	24.8	209.514	M06Apr2008	0	0	0	0	0	0	0	0	0	0	0	0	0	0	0	0	0	0	0	0	0	0	0	0	0	0	0	0
M07Apr2008	2008	Apr	M07	1	Saline	1	2.4	5	1.4	24.43	7.29	29.09	8.1	24.19	6.88	32.03	8.13	0	24.5	85.2171	M07Apr2008	0	0	0	0	0	0	0	0	0	0	0	0	0	0	0	0	0	0	0	0	0	0	0	0	0	0	0	0
M07Apr2008	2008	Apr	M07	2	Saline	1	2.4	5	1.4	24.43	7.29	29.09	8.1	24.19	6.88	32.03	8.13	0	24.5	85.2171	M07Apr2008	0	0	0	0	0	0	0	0	0	0	0	0	0	0	0	0	0	0	0	0	0	0	0	0	0	0	0	0
M07Apr2008	2008	Apr	M07	3	Saline	1	2.4	5	1.4	24.43	7.29	29.09	8.1	24.19	6.88	32.03	8.13	0	24.5	85.2171	M07Apr2008	0	0	0	0	0	0	0	0	0	0	0	1	0	0	0	0	0	0	0	0	0	0	0	0	0	0	0	0
M08Apr2008	2008	Apr	M08	1	Saline	1	1.2	5.6	1	24.27	6.44	31.8	8.04	24.23	6.37	31.8	8.05	0	24.3	108.817	M08Apr2008	0	0	0	0	0	0	0	0	0	0	0	0	0	0	0	0	0	0	0	0	0	0	0	0	0	0	0	0
M08Apr2008	2008	Apr	M08	2	Saline	1	1.2	5.6	1	24.27	6.44	31.8	8.04	24.23	6.37	31.8	8.05	0	24.3	108.817	M08Apr2008	0	0	0	0	0	0	0	0	0	0	1	0	0	0	0	0	0	0	0	0	0	0	0	0	0	0	0	0
M08Apr2008	2008	Apr	M08	3	Saline	1	1.2	5.6	1	24.27	6.44	31.8	8.04	24.23	6.37	31.8	8.05	0	24.3	108.817	M08Apr2008	0	0	0	0	0	0	0	0	0	0	0	0	0	0	0	0	0	0	0	0	0	0	0	0	0	0	0	0
M09Apr2008	2008	Apr	M09	1	Saline	1	1.5	4.5	9.9	24.69	6.75	34.7	8.12	24.69	6.72	34.7	8.13	0	24.5	178.814	M09Apr2008	0	0	0	0	0	0	0	0	0	0	0	1	0	0	0	0	0	0	0	0	0	0	0	0	0	0	0	0
M09Apr2008	2008	Apr	M09	2	Saline	1	1.5	4.5	9.9	24.69	6.75	34.7	8.12	24.69	6.72	34.7	8.13	0	24.5	178.814	M09Apr2008	0	0	0	0	0	0	0	0	0	0	0	1	0	0	0	1	0	0	0	0	0	0	0	0	0	0	0	0
M09Apr2008	2008	Apr	M09	3	Saline	1	1.5	4.5	9.9	24.69	6.75	34.7	8.12	24.69	6.72	34.7	8.13	0	24.5	178.814	M09Apr2008	0	0	0	0	0	0	0	0	0	0	0	0	0	0	0	0	0	0	0	0	0	0	0	0	0	0	0	0
M10Apr2008	2008	Apr	M10	1	Saline	1	1.4	4.9	9.9	24.83	6.48	35.02	8.1	24.85	6.46	35.02	8.1	0	23.7	80.7917	M10Apr2008	0	0	0	0	0	0	0	0	0	0	0	0	0	0	0	0	0	0	0	1	0	0	0	0	0	0	0	0
M10Apr2008	2008	Apr	M10	2	Saline	1	1.4	4.9	9.9	24.83	6.48	35.02	8.1	24.85	6.46	35.02	8.1	0	23.7	80.7917	M10Apr2008	0	0	0	0	0	0	0	0	0	0	0	0	0	0	0	0	0	0	0	34	0	0	0	0	0	0	0	0
M10Apr2008	2008	Apr	M10	3	Saline	1	1.4	4.9	9.9	24.83	6.48	35.02	8.1	24.85	6.46	35.02	8.1	0	23.7	80.7917	M10Apr2008	0	0	0	0	0	0	0	0	0	0	0	0	0	0	0	0	0	0	0	2	0	0	0	0	0	0	0	0
M11Apr2008	2008	Apr	M11	1	Saline	1	1.8	2.8	9.9	24.76	6.6	34.71	8.14	24.76	6.56	34.71	8.15	0	24.3	79.315	M11Apr2008	0	0	0	0	0	0	0	0	0	0	0	0	0	0	0	0	0	0	0	0	0	0	0	0	0	0	0	0
M11Apr2008	2008	Apr	M11	2	Saline	1	1.8	2.8	9.9	24.76	6.6	34.71	8.14	24.76	6.56	34.71	8.15	0	24.3	79.315	M11Apr2008	0	0	0	0	0	0	0	0	0	5	0	1	0	0	0	0	0	0	0	0	0	0	0	0	0	0	0	0
M11Apr2008	2008	Apr	M11	3	Saline	1	1.8	2.8	9.9	24.76	6.6	34.71	8.14	24.76	6.56	34.71	8.15	0	24.3	79.315	M11Apr2008	0	0	0	0	0	0	0	0	0	2	0	0	0	0	0	0	0	0	0	0	0	0	0	0	0	0	0	0
M12Apr2008	2008	Apr	M12	1	Saline	1	1.7	2.3	9.9	24.29	6.76	32.54	8.14	24.4	6.89	33.65	8.17	0	24.7	165.017	M12Apr2008	0	0	0	0	0	0	0	0	0	0	0	0	0	0	0	0	0	0	0	0	0	0	0	0	0	0	0	0
M12Apr2008	2008	Apr	M12	2	Saline	1	1.7	2.3	9.9	24.29	6.76	32.54	8.14	24.4	6.89	33.65	8.17	0	24.7	165.017	M12Apr2008	0	3	0	0	0	0	0	0	0	0	0	0	0	0	0	0	0	0	0	0	0	0	0	0	0	0	0	0
M12Apr2008	2008	Apr	M12	3	Saline	1	1.7	2.3	9.9	24.29	6.76	32.54	8.14	24.4	6.89	33.65	8.17	0	24.7	165.017	M12Apr2008	0	4	0	0	0	0	0	0	0	0	0	0	0	0	0	0	0	0	0	0	0	0	0	0	0	0	0	0
M13Apr2008	2008	Apr	M13	1	Saline	1	1.1	3.4	9.9	24.67	6.71	31.98	8.19	24.63	6.93	32.37	8.23	0	24.6	183.167	M13Apr2008	0	0	0	2	0	0	0	0	0	0	0	0	0	0	0	0	0	0	0	0	0	0	0	0	0	0	0	0
M13Apr2008	2008	Apr	M13	2	Saline	1	1.1	3.4	9.9	24.67	6.71	31.98	8.19	24.63	6.93	32.37	8.23	0	24.6	183.167	M13Apr2008	0	0	0	2	0	0	0	0	0	0	0	0	0	0	0	0	0	0	0	0	0	0	0	0	0	0	0	0
M13Apr2008	2008	Apr	M13	3	Saline	1	1.1	3.4	9.9	24.67	6.71	31.98	8.19	24.63	6.93	32.37	8.23	0	24.6	183.167	M13Apr2008	0	1	0	0	0	0	0	0	0	0	0	0	0	0	0	0	0	0	0	0	0	0	0	0	0	0	0	0
M14Apr2008	2008	Apr	M14	1	Estuarine	1	2.1	4.4	0.9	25.6	6.38	7.1	7.65	25.7	5.42	8.6	7.54	1	21.6	91.1083	M14Apr2008	0	0	0	0	0	0	0	0	0	0	0	0	0	0	0	0	0	0	0	0	0	0	0	0	0	0	0	0
M14Apr2008	2008	Apr	M14	2	Estuarine	1	2.1	4.4	0.9	25.6	6.38	7.1	7.65	25.7	5.42	8.6	7.54	1	21.6	91.1083	M14Apr2008	0	0	0	0	0	0	0	0	0	0	0	0	0	0	0	0	0	0	0	0	0	0	0	0	0	0	0	0
M14Apr2008	2008	Apr	M14	3	Estuarine	1	2.1	4.4	0.9	25.6	6.38	7.1	7.65	25.7	5.42	8.6	7.54	1	21.6	91.1083	M14Apr2008	0	0	0	0	0	0	0	0	0	0	0	0	0	0	0	0	0	0	0	0	0	0	0	0	0	0	0	0
M01Jul2008	2008	Jul	M01	1	Fresh	1	1.5	14.3	0.5	26.6	3.06	0.4	7.16	26.6	3.01	0.4	7.16	0	30.9	114	M01Jul2008	0	0	0	0	0	0	0	0	0	0	0	0	0	0	0	0	0	0	0	0	0	0	0	0	0	0	0	0
M01Jul2008	2008	Jul	M01	2	Fresh	1	1.5	14.3	0.5	26.6	3.06	0.4	7.16	26.6	3.01	0.4	7.16	0	30.9	114	M01Jul2008	0	0	0	0	0	0	0	0	0	0	0	0	0	0	0	0	0	0	0	0	0	0	0	0	0	0	0	0
M01Jul2008	2008	Jul	M01	3	Fresh	1	1.5	14.3	0.5	26.6	3.06	0.4	7.16	26.6	3.01	0.4	7.16	0	30.9	114	M01Jul2008	0	0	0	0	0	0	0	0	0	0	0	0	0	0	0	0	0	0	0	0	0	0	0	0	0	0	0	0
M02Jul2008	2008	Jul	M02	1	Estuarine	1	1.6	7.4	0.8	27.8	3.86	0.5	7.11	27.8	3.8	0.5	7.14	1	28.3	192.6	M02Jul2008	0	0	0	0	0	0	0	0	0	0	0	0	0	0	0	0	0	0	0	0	0	1	0	0	0	0	0	0
M02Jul2008	2008	Jul	M02	2	Estuarine	1	1.6	7.4	0.8	27.8	3.86	0.5	7.11	27.8	3.8	0.5	7.14	1	28.3	192.6	M02Jul2008	0	0	0	0	0	0	0	0	0	0	0	0	0	0	0	0	0	0	0	0	0	4	0	0	0	0	0	0
M02Jul2008	2008	Jul	M02	3	Estuarine	1	1.6	7.4	0.8	27.8	3.86	0.5	7.11	27.8	3.8	0.5	7.14	1	28.3	192.6	M02Jul2008	0	0	0	0	0	0	0	0	0	0	0	0	0	0	0	0	0	0	0	0	0	1	0	0	0	0	0	0
M03Jul2008	2008	Jul	M03	1	Estuarine	1	2.6	5.9	0.9	29.4	7.63	3	8.16	29	1.92	8.7	7.54	1	29.2	274.057	M03Jul2008	0	0	0	0	0	0	0	0	0	0	0	0	0	0	0	0	0	0	0	0	0	0	0	0	0	0	0	0
M03Jul2008	2008	Jul	M03	2	Estuarine	1	2.6	5.9	0.9	29.4	7.63	3	8.16	29	1.92	8.7	7.54	1	29.2	274.057	M03Jul2008	0	0	0	0	0	0	0	0	0	0	0	0	0	0	0	0	0	0	0	0	0	0	0	0	0	0	0	0
M03Jul2008	2008	Jul	M03	3	Estuarine	1	2.6	5.9	0.9	29.4	7.63	3	8.16	29	1.92	8.7	7.54	1	29.2	274.057	M03Jul2008	0	0	0	0	0	0	0	0	0	0	0	0	0	0	0	0	0	0	0	0	0	0	0	0	0	0	0	0
M04Jul2008	2008	Jul	M04	1	Estuarine	1	1.5	10.5	0.6	29.6	4.21	5.4	7.66	29	3.61	10	7.63	1	29.2	294.824	M04Jul2008	0	0	0	0	0	0	0	0	0	0	0	0	0	0	0	0	0	0	0	0	0	0	0	0	0	0	0	0
M04Jul2008	2008	Jul	M04	2	Estuarine	1	1.5	10.5	0.6	29.6	4.21	5.4	7.66	29	3.61	10	7.63	1	29.2	294.824	M04Jul2008	0	0	0	0	0	0	0	0	0	0	0	0	0	0	0	0	0	0	0	0	0	0	0	0	0	0	0	0
M04Jul2008	2008	Jul	M04	3	Estuarine	1	1.5	10.5	0.6	29.6	4.21	5.4	7.66	29	3.61	10	7.63	1	29.2	294.824	M04Jul2008	0	0	0	0	0	0	0	0	0	0	0	0	0	0	0	0	0	0	0	0	0	0	0	0	0	0	0	0
M05Jul2008	2008	Jul	M05	1	Estuarine	1	2	5.5	1	28.8	5.73	7.6	7.9	28.8	4.74	13.4	7.82	1	30.8	205.9	M05Jul2008	0	0	0	0	0	0	0	0	0	0	0	0	0	0	0	0	0	0	0	0	0	0	0	0	0	0	0	0
M05Jul2008	2008	Jul	M05	2	Estuarine	1	2	5.5	1	28.8	5.73	7.6	7.9	28.8	4.74	13.4	7.82	1	30.8	205.9	M05Jul2008	0	0	0	0	0	0	0	0	0	0	0	0	0	0	0	0	0	0	0	0	0	0	0	0	0	0	0	0
M05Jul2008	2008	Jul	M05	3	Estuarine	1	2	5.5	1	28.8	5.73	7.6	7.9	28.8	4.74	13.4	7.82	1	30.8	205.9	M05Jul2008	0	0	0	0	0	0	0	0	0	0	0	0	0	0	0	0	0	0	0	0	0	0	0	0	0	0	0	0
M06Jul2008	2008	Jul	M06	1	Estuarine	1	2.5	4.9	1	28.8	5.92	10.3	8.02	28.1	4.73	21.5	8.06	0	28.6	209.514	M06Jul2008	0	0	0	0	0	0	0	0	0	0	0	0	0	0	0	0	0	0	0	0	0	0	0	0	0	0	0	0
M06Jul2008	2008	Jul	M06	2	Estuarine	1	2.5	4.9	1	28.8	5.92	10.3	8.02	28.1	4.73	21.5	8.06	0	28.6	209.514	M06Jul2008	0	0	0	0	0	0	0	0	0	0	0	0	0	0	0	0	0	0	0	1	0	0	0	0	0	0	0	0
M06Jul2008	2008	Jul	M06	3	Estuarine	1	2.5	4.9	1	28.8	5.92	10.3	8.02	28.1	4.73	21.5	8.06	0	28.6	209.514	M06Jul2008	0	0	0	0	0	0	0	0	0	0	0	0	0	0	0	0	0	0	0	1	0	0	0	0	0	0	0	0
M07Jul2008	2008	Jul	M07	1	Saline	1	2.1	6.8	1.1	28.2	5.92	18.7	8.22	27.9	5.28	32.1	8.3	0	28.4	85.2171	M07Jul2008	0	0	0	0	0	0	0	0	0	1	0	0	0	0	0	0	0	0	0	0	0	0	0	0	0	0	0	0
M07Jul2008	2008	Jul	M07	2	Saline	1	2.1	6.8	1.1	28.2	5.92	18.7	8.22	27.9	5.28	32.1	8.3	0	28.4	85.2171	M07Jul2008	0	0	0	0	0	0	0	0	0	1	0	0	0	0	0	0	0	0	0	0	0	0	0	0	0	0	0	0
M07Jul2008	2008	Jul	M07	3	Saline	1	2.1	6.8	1.1	28.2	5.92	18.7	8.22	27.9	5.28	32.1	8.3	0	28.4	85.2171	M07Jul2008	0	0	0	0	0	0	0	0	0	0	0	0	0	0	0	0	0	0	0	0	0	0	0	0	0	0	0	0
M08Jul2008	2008	Jul	M08	1	Saline	1	0.7	6.2	9.9	28.5	4.31	31.5	8.22	28.6	4.34	32	8.2	0	27.5	108.817	M08Jul2008	0	0	0	0	0	0	0	0	0	2	0	0	0	0	0	0	0	0	0	0	0	0	0	0	0	0	0	0
M08Jul2008	2008	Jul	M08	2	Saline	1	0.7	6.2	9.9	28.5	4.31	31.5	8.22	28.6	4.34	32	8.2	0	27.5	108.817	M08Jul2008	0	0	0	0	0	0	0	0	0	1	0	0	0	0	0	0	0	0	0	0	0	0	0	0	0	0	0	0
M08Jul2008	2008	Jul	M08	3	Saline	1	0.7	6.2	9.9	28.5	4.31	31.5	8.22	28.6	4.34	32	8.2	0	27.5	108.817	M08Jul2008	0	0	0	0	0	0	0	0	0	5	0	0	0	0	0	0	0	0	0	0	0	0	0	0	0	0	0	0
M09Jul2008	2008	Jul	M09	1	Saline	1	1.2	2.5	9.9	27.5	5.71	32.2	8.45	27.6	5.31	32.6	8.43	0	28.3	178.814	M09Jul2008	0	0	0	0	0	0	0	0	0	0	0	0	0	0	0	0	0	0	0	0	0	0	0	0	0	0	0	0
M09Jul2008	2008	Jul	M09	2	Saline	1	1.2	2.5	9.9	27.5	5.71	32.2	8.45	27.6	5.31	32.6	8.43	0	28.3	178.814	M09Jul2008	0	0	0	0	0	0	0	0	0	0	0	0	0	0	0	0	0	0	0	0	0	0	0	0	0	0	0	0
M09Jul2008	2008	Jul	M09	3	Saline	1	1.2	2.5	9.9	27.5	5.71	32.2	8.45	27.6	5.31	32.6	8.43	0	28.3	178.814	M09Jul2008	0	0	0	0	0	0	0	0	0	0	0	0	0	0	0	0	0	0	0	0	0	0	0	0	0	0	0	0
M10Jul2008	2008	Jul	M10	1	Saline	1	1.5	1.4	9.9	28.8	4.77	33.8	8.22	28	5.39	33.8	8.25	0	28.1	80.7917	M10Jul2008	0	0	0	0	0	0	0	0	0	0	0	0	0	0	0	0	0	0	0	0	0	0	0	0	0	0	0	0
M10Jul2008	2008	Jul	M10	2	Saline	1	1.5	1.4	9.9	28.8	4.77	33.8	8.22	28	5.39	33.8	8.25	0	28.1	80.7917	M10Jul2008	0	0	0	0	0	0	0	0	0	0	0	0	0	0	0	0	0	0	0	0	0	0	0	0	0	0	0	0
M10Jul2008	2008	Jul	M10	3	Saline	1	1.5	1.4	9.9	28.8	4.77	33.8	8.22	28	5.39	33.8	8.25	0	28.1	80.7917	M10Jul2008	0	0	0	0	0	0	0	0	0	0	0	0	0	0	0	0	0	0	0	0	0	0	0	0	0	0	0	0
M11Jul2008	2008	Jul	M11	1	Saline	1	1.9	2.4	9.9	28.6	5.04	34.8	8.31	28.5	5.34	34.8	8.31	0	28	79.315	M11Jul2008	0	0	0	0	0	0	0	0	0	0	1	0	0	0	0	0	0	0	0	0	0	0	0	0	0	0	0	0
M11Jul2008	2008	Jul	M11	2	Saline	1	1.9	2.4	9.9	28.6	5.04	34.8	8.31	28.5	5.34	34.8	8.31	0	28	79.315	M11Jul2008	0	0	0	0	0	0	0	0	0	0	3	0	0	0	0	0	0	0	0	0	0	0	0	0	0	0	0	0
M11Jul2008	2008	Jul	M11	3	Saline	1	1.9	2.4	9.9	28.6	5.04	34.8	8.31	28.5	5.34	34.8	8.31	0	28	79.315	M11Jul2008	0	0	0	0	0	0	0	0	0	0	4	0	0	0	0	0	0	0	0	0	0	0	0	0	0	0	0	0
M12Jul2008	2008	Jul	M12	1	Saline	1	1.6	3.6	9.9	27.8	5.59	27.3	8.08	27.6	5.53	29.3	8.12	0	28.9	165.017	M12Jul2008	0	1	0	0	0	0	0	0	0	0	0	0	0	0	0	0	0	0	0	0	0	0	0	0	0	0	0	0
M12Jul2008	2008	Jul	M12	2	Saline	1	1.6	3.6	9.9	27.8	5.59	27.3	8.08	27.6	5.53	29.3	8.12	0	28.9	165.017	M12Jul2008	0	1	0	0	0	0	0	0	0	0	0	2	0	0	0	0	0	0	0	0	0	0	0	0	0	0	0	0
M12Jul2008	2008	Jul	M12	3	Saline	1	1.6	3.6	9.9	27.8	5.59	27.3	8.08	27.6	5.53	29.3	8.12	0	28.9	165.017	M12Jul2008	0	0	0	0	0	0	0	0	0	0	0	0	0	0	0	0	0	0	0	0	0	0	0	0	0	0	0	0
M13Jul2008	2008	Jul	M13	1	Saline	1	1.1	2.2	9.9	28.7	6.48	31.5	8.31	28.7	7.11	31.7	8.37	0	28.9	183.167	M13Jul2008	0	0	0	0	0	0	0	0	0	0	0	0	0	0	0	0	0	0	0	0	0	0	0	0	0	0	0	0
M13Jul2008	2008	Jul	M13	2	Saline	1	1.1	2.2	9.9	28.7	6.48	31.5	8.31	28.7	7.11	31.7	8.37	0	28.9	183.167	M13Jul2008	0	0	0	0	0	0	0	0	0	0	0	0	0	0	0	0	0	0	0	0	0	0	0	0	0	0	0	0
M13Jul2008	2008	Jul	M13	3	Saline	1	1.1	2.2	9.9	28.7	6.48	31.5	8.31	28.7	7.11	31.7	8.37	0	28.9	183.167	M13Jul2008	0	0	0	0	0	0	0	0	0	0	0	0	0	0	0	0	0	0	0	0	0	0	0	0	0	0	0	0
M14Jul2008	2008	Jul	M14	1	Estuarine	1	1.9	8.3	0.6	28.9	3.53	1.4	7.48	28.4	2.47	2.7	7.33	1	31.6	91.1083	M14Jul2008	0	0	0	0	0	0	0	0	0	0	0	0	0	0	0	0	0	0	0	0	0	0	0	0	0	0	0	0
M14Jul2008	2008	Jul	M14	2	Estuarine	1	1.9	8.3	0.6	28.9	3.53	1.4	7.48	28.4	2.47	2.7	7.33	1	31.6	91.1083	M14Jul2008	0	0	0	0	0	0	0	0	0	0	0	0	0	0	0	0	0	0	0	0	0	0	0	0	0	0	0	0
M14Jul2008	2008	Jul	M14	3	Estuarine	1	1.9	8.3	0.6	28.9	3.53	1.4	7.48	28.4	2.47	2.7	7.33	1	31.6	91.1083	M14Jul2008	0	0	0	0	0	0	0	0	0	0	0	0	0	0	0	0	0	0	0	0	0	0	0	0	0	0	0	0
M15Jul2008	2008	Jul	M15	1	Fresh	1	1.9	5.8	0.8	27.4	4.29	0.5	7.31	26.5	2.86	0.5	7.27	0	28.8	111.3	M15Jul2008	0	0	0	0	0	0	0	0	0	0	0	0	0	0	0	0	0	0	0	0	0	0	0	0	0	0	0	0
M15Jul2008	2008	Jul	M15	2	Fresh	1	1.9	5.8	0.8	27.4	4.29	0.5	7.31	26.5	2.86	0.5	7.27	0	28.8	111.3	M15Jul2008	0	0	0	0	0	0	0	0	0	0	0	0	0	0	0	0	0	0	0	0	0	0	0	0	0	0	0	0
M15Jul2008	2008	Jul	M15	3	Fresh	1	1.9	5.8	0.8	27.4	4.29	0.5	7.31	26.5	2.86	0.5	7.27	0	28.8	111.3	M15Jul2008	0	0	0	0	0	0	0	0	0	0	0	0	0	0	0	0	0	0	0	0	0	0	0	0	0	0	0	0
M01Oct2008	2008	Oct	M01	1	Fresh	2	1.6	8.5	1	26.04	3.59	0.6	7.22	26.04	3.55	0.6	7.2	0	25.6	114	M01Oct2008	0	0	0	0	0	0	0	0	0	0	0	0	0	0	0	0	0	0	0	0	0	0	0	0	0	0	0	0
M01Oct2008	2008	Oct	M01	2	Fresh	2	1.6	8.5	1	26.04	3.59	0.6	7.22	26.04	3.55	0.6	7.2	0	25.6	114	M01Oct2008	0	0	0	0	0	0	0	0	0	0	0	0	0	0	0	0	0	0	0	0	0	0	0	0	0	0	0	0
M01Oct2008	2008	Oct	M01	3	Fresh	2	1.6	8.5	1	26.04	3.59	0.6	7.22	26.04	3.55	0.6	7.2	0	25.6	114	M01Oct2008	0	0	0	0	0	0	0	0	0	0	0	0	0	0	0	0	0	0	0	0	0	0	0	0	0	0	0	0
M02Oct2008	2008	Oct	M02	1	Estuarine	2	1.9	5.3	1	26.4	4.08	0.5	7.38	26.4	3.97	0.5	7.42	1	22.4	192.6	M02Oct2008	0	0	0	0	0	0	0	0	0	0	0	0	0	0	0	0	0	0	0	0	0	0	0	0	0	0	0	0
M02Oct2008	2008	Oct	M02	2	Estuarine	2	1.9	5.3	1	26.4	4.08	0.5	7.38	26.4	3.97	0.5	7.42	1	22.4	192.6	M02Oct2008	0	0	0	0	0	0	0	0	0	0	0	0	0	0	0	0	0	0	0	0	0	0	0	0	0	0	0	0
M02Oct2008	2008	Oct	M02	3	Estuarine	2	1.9	5.3	1	26.4	4.08	0.5	7.38	26.4	3.97	0.5	7.42	1	22.4	192.6	M02Oct2008	0	0	0	0	0	0	0	0	0	0	0	0	0	0	0	0	0	0	0	0	0	0	0	0	0	0	0	0
M03Oct2008	2008	Oct	M03	1	Estuarine	2	3.2	3	1.2	27.4	5.66	5.4	7.45	27.8	9.2	7.06	7.45	1	25.5	274.057	M03Oct2008	0	0	0	0	0	0	0	0	0	0	0	0	0	0	0	0	0	0	0	0	0	0	0	0	0	0	0	0
M03Oct2008	2008	Oct	M03	2	Estuarine	2	3.2	3	1.2	27.4	5.66	5.4	7.45	27.8	9.2	7.06	7.45	1	25.5	274.057	M03Oct2008	0	0	0	0	0	0	0	0	0	0	5	0	0	0	0	0	0	0	0	0	0	0	0	0	0	0	0	0
M03Oct2008	2008	Oct	M03	3	Estuarine	2	3.2	3	1.2	27.4	5.66	5.4	7.45	27.8	9.2	7.06	7.45	1	25.5	274.057	M03Oct2008	0	0	0	0	0	0	0	0	0	0	0	0	0	0	0	0	0	0	0	0	0	0	0	0	0	0	0	0
M04Oct2008	2008	Oct	M04	1	Estuarine	2	2.1	19.2	0.5	28	6.01	1.4	7.32	27.7	4.24	9.4	7.23	1	27.1	294.824	M04Oct2008	0	0	0	0	0	0	0	0	0	0	0	0	0	0	0	0	0	0	0	0	0	0	0	0	0	0	0	0
M04Oct2008	2008	Oct	M04	2	Estuarine	2	2.1	19.2	0.5	28	6.01	1.4	7.32	27.7	4.24	9.4	7.23	1	27.1	294.824	M04Oct2008	0	0	0	0	0	0	0	0	0	0	0	0	0	0	0	0	0	0	0	0	0	0	0	0	0	0	0	0
M04Oct2008	2008	Oct	M04	3	Estuarine	2	2.1	19.2	0.5	28	6.01	1.4	7.32	27.7	4.24	9.4	7.23	1	27.1	294.824	M04Oct2008	0	0	0	0	0	0	0	0	0	0	0	0	0	0	0	0	0	0	0	0	0	0	0	0	0	0	0	0
M06Oct2008	2008	Oct	M06	1	Estuarine	2	3.1	6.3	1	26.8	6.12	10.2	7.57	27.7	4.91	25.2	7.41	0	24.3	209.514	M06Oct2008	0	0	0	0	0	0	0	0	0	0	0	0	0	0	0	0	0	0	0	0	0	0	0	0	0	0	0	0
M06Oct2008	2008	Oct	M06	2	Estuarine	2	3.1	6.3	1	26.8	6.12	10.2	7.57	27.7	4.91	25.2	7.41	0	24.3	209.514	M06Oct2008	0	0	0	0	0	0	0	0	0	0	0	0	0	0	0	0	0	0	0	0	0	0	0	0	0	0	0	0
M06Oct2008	2008	Oct	M06	3	Estuarine	2	3.1	6.3	1	26.8	6.12	10.2	7.57	27.7	4.91	25.2	7.41	0	24.3	209.514	M06Oct2008	0	0	0	0	0	0	0	0	0	0	0	0	0	0	0	0	0	0	0	0	0	0	0	0	0	0	0	0
M07Oct2008	2008	Oct	M07	1	Saline	2	2.3	5.6	1.1	26.9	5.84	18.9	7.72	27.4	5.75	29.6	7.84	0	23.7	85.2171	M07Oct2008	0	0	0	0	0	0	0	0	0	0	0	0	0	0	0	0	0	0	0	2	0	0	0	0	0	0	0	0
M07Oct2008	2008	Oct	M07	2	Saline	2	2.3	5.6	1.1	26.9	5.84	18.9	7.72	27.4	5.75	29.6	7.84	0	23.7	85.2171	M07Oct2008	0	0	0	0	0	0	0	0	0	0	0	0	0	0	1	0	0	0	0	0	0	0	0	0	0	0	0	0
M07Oct2008	2008	Oct	M07	3	Saline	2	2.3	5.6	1.1	26.9	5.84	18.9	7.72	27.4	5.75	29.6	7.84	0	23.7	85.2171	M07Oct2008	0	0	0	0	0	0	0	0	0	0	0	0	0	0	1	0	0	0	0	1	0	0	0	0	0	0	0	0
M08Oct2008	2008	Oct	M08	1	Saline	2	1.6	6.8	1	27	5.21	23.6	7.77	27.1	3.5	26.1	7.45	0	22.7	108.817	M08Oct2008	0	0	0	0	0	0	0	0	0	0	1	0	0	0	0	0	0	0	0	0	0	0	0	0	0	0	0	0
M08Oct2008	2008	Oct	M08	2	Saline	2	1.6	6.8	1	27	5.21	23.6	7.77	27.1	3.5	26.1	7.45	0	22.7	108.817	M08Oct2008	0	0	0	0	0	0	0	0	0	0	2	0	0	0	0	0	0	0	0	0	0	0	0	0	0	0	0	0
M08Oct2008	2008	Oct	M08	3	Saline	2	1.6	6.8	1	27	5.21	23.6	7.77	27.1	3.5	26.1	7.45	0	22.7	108.817	M08Oct2008	0	0	0	0	0	0	0	0	0	0	4	0	0	0	0	0	0	0	0	0	0	0	0	0	0	0	0	1
M09Oct2008	2008	Oct	M09	1	Saline	2	1.8	5.9	1.3	26.6	6.44	29.5	7.85	27.1	5.2	32.1	7.81	0	22.9	178.814	M09Oct2008	0	0	0	0	0	0	0	0	0	0	0	0	0	0	0	0	0	0	0	0	0	0	0	0	0	0	0	0
M09Oct2008	2008	Oct	M09	2	Saline	2	1.8	5.9	1.3	26.6	6.44	29.5	7.85	27.1	5.2	32.1	7.81	0	22.9	178.814	M09Oct2008	0	0	0	0	0	0	0	0	0	0	4	0	0	0	0	0	0	0	0	0	0	0	0	0	0	0	0	0
M09Oct2008	2008	Oct	M09	3	Saline	2	1.8	5.9	1.3	26.6	6.44	29.5	7.85	27.1	5.2	32.1	7.81	0	22.9	178.814	M09Oct2008	0	0	0	0	0	0	0	0	0	0	1	0	0	0	0	1	0	0	0	0	0	0	0	0	0	0	0	0
M10Oct2008	2008	Oct	M10	1	Saline	2	1.8	5.1	1.4	26.6	5	27	7.73	26.5	4.8	27.9	7.73	0	24.7	80.7917	M10Oct2008	0	0	0	0	0	0	0	0	0	0	0	0	0	0	0	0	0	0	0	3	0	0	0	0	0	0	0	0
M10Oct2008	2008	Oct	M10	2	Saline	2	1.8	5.1	1.4	26.6	5	27	7.73	26.5	4.8	27.9	7.73	0	24.7	80.7917	M10Oct2008	0	0	0	0	0	0	0	0	0	0	0	0	0	0	0	0	0	0	0	1	0	0	0	0	0	0	0	0
M10Oct2008	2008	Oct	M10	3	Saline	2	1.8	5.1	1.4	26.6	5	27	7.73	26.5	4.8	27.9	7.73	0	24.7	80.7917	M10Oct2008	0	0	0	0	0	0	0	0	0	0	0	0	0	0	0	0	0	0	0	13	0	0	0	0	0	0	0	0
M11Oct2008	2008	Oct	M11	1	Saline	2	2.3	9.8	1	27.1	6.68	29.7	8.16	26.9	6.34	29.6	8.15	0	31.3	79.315	M11Oct2008	0	0	0	0	0	0	0	0	0	0	2	0	0	0	0	0	0	0	0	0	0	0	0	0	0	0	0	0
M11Oct2008	2008	Oct	M11	2	Saline	2	2.3	9.8	1	27.1	6.68	29.7	8.16	26.9	6.34	29.6	8.15	0	31.3	79.315	M11Oct2008	0	0	0	0	0	0	0	0	0	0	1	0	0	0	0	0	0	0	0	0	0	0	0	0	0	0	0	0
M11Oct2008	2008	Oct	M11	3	Saline	2	2.3	9.8	1	27.1	6.68	29.7	8.16	26.9	6.34	29.6	8.15	0	31.3	79.315	M11Oct2008	0	0	0	0	0	0	0	0	0	0	2	0	0	0	0	0	0	0	0	0	0	0	0	0	0	0	0	0
M12Oct2008	2008	Oct	M12	1	Saline	2	2	6.5	1.2	28.2	5.88	34.2	8.02	27.9	5.77	36.7	8.18	0	26.3	165.017	M12Oct2008	0	0	0	0	0	0	0	0	0	0	0	0	0	0	0	0	0	0	0	0	0	0	0	0	0	0	0	0
M12Oct2008	2008	Oct	M12	2	Saline	2	2	6.5	1.2	28.2	5.88	34.2	8.02	27.9	5.77	36.7	8.18	0	26.3	165.017	M12Oct2008	0	0	0	0	0	0	0	0	0	0	0	0	0	0	0	0	0	0	0	0	0	0	0	0	0	0	0	0
M12Oct2008	2008	Oct	M12	3	Saline	2	2	6.5	1.2	28.2	5.88	34.2	8.02	27.9	5.77	36.7	8.18	0	26.3	165.017	M12Oct2008	0	0	0	0	0	0	0	0	0	0	0	0	0	0	0	0	0	0	0	0	0	0	0	0	0	0	0	0
M13Oct2008	2008	Oct	M13	1	Saline	2	1.7	4.8	1.3	27.5	5.07	26.2	7.76	27.2	4.62	29.2	7.76	0	26.4	183.167	M13Oct2008	0	0	0	0	0	0	0	0	0	0	0	0	0	0	0	0	0	0	0	4	0	0	0	0	0	0	0	0
M13Oct2008	2008	Oct	M13	2	Saline	2	1.7	4.8	1.3	27.5	5.07	26.2	7.76	27.2	4.62	29.2	7.76	0	26.4	183.167	M13Oct2008	0	0	0	0	0	0	0	0	0	0	0	0	0	0	0	0	0	0	0	0	0	0	0	0	0	0	0	0
M13Oct2008	2008	Oct	M13	3	Saline	2	1.7	4.8	1.3	27.5	5.07	26.2	7.76	27.2	4.62	29.2	7.76	0	26.4	183.167	M13Oct2008	0	0	0	0	0	0	0	0	0	0	0	0	0	0	0	0	0	0	0	0	0	0	0	0	0	0	0	0
M14Oct2008	2008	Oct	M14	1	Estuarine	2	2.1	20.8	0.5	27.2	6.03	0.3	7.3	26.6	5.63	0.3	7.15	1	27.1	91.1083	M14Oct2008	0	0	0	0	0	0	0	0	0	0	0	0	0	0	0	0	0	0	0	0	0	0	0	0	0	0	0	0
M14Oct2008	2008	Oct	M14	2	Estuarine	2	2.1	20.8	0.5	27.2	6.03	0.3	7.3	26.6	5.63	0.3	7.15	1	27.1	91.1083	M14Oct2008	0	0	0	0	0	0	0	0	0	0	0	0	0	0	0	0	0	0	0	0	0	0	0	0	0	0	0	0
M14Oct2008	2008	Oct	M14	3	Estuarine	2	2.1	20.8	0.5	27.2	6.03	0.3	7.3	26.6	5.63	0.3	7.15	1	27.1	91.1083	M14Oct2008	0	0	0	0	0	0	0	0	0	0	0	0	0	0	0	0	0	0	0	0	0	0	0	0	0	0	0	0
M02Jan2009	2009	Jan	M02	1	Estuarine	2	1.8	3.58	1.3	22.1	6.15	11.15	7.64	22.39	4.87	12.04	7.59	1	21.6	192.6	M02Jan2009	0	0	0	0	0	0	0	0	0	0	0	0	0	0	0	0	0	0	0	1	0	0	0	0	0	0	0	0
M02Jan2009	2009	Jan	M02	2	Estuarine	2	1.8	3.58	1.3	22.1	6.15	11.15	7.64	22.39	4.87	12.04	7.59	1	21.6	192.6	M02Jan2009	0	0	0	0	0	0	0	0	0	0	0	0	0	0	0	0	0	0	0	0	0	0	0	0	0	0	0	0
M02Jan2009	2009	Jan	M02	3	Estuarine	2	1.8	3.58	1.3	22.1	6.15	11.15	7.64	22.39	4.87	12.04	7.59	1	21.6	192.6	M02Jan2009	0	0	0	0	0	0	0	0	0	0	0	0	0	0	0	0	0	0	0	0	0	0	0	0	0	0	0	0
M03Jan2009	2009	Jan	M03	1	Estuarine	2	2.7	2.43	2	22.28	8.07	15.25	7.98	21.46	5.86	18.64	7.77	1	25.5	274.057	M03Jan2009	0	0	0	0	0	0	0	0	0	0	0	0	0	0	0	0	0	0	0	0	0	0	0	0	0	0	0	0
M03Jan2009	2009	Jan	M03	2	Estuarine	2	2.7	2.43	2	22.28	8.07	15.25	7.98	21.46	5.86	18.64	7.77	1	25.5	274.057	M03Jan2009	0	0	0	0	0	0	0	0	0	0	0	0	0	0	0	0	0	0	0	0	0	0	0	0	0	0	0	0
M03Jan2009	2009	Jan	M03	3	Estuarine	2	2.7	2.43	2	22.28	8.07	15.25	7.98	21.46	5.86	18.64	7.77	1	25.5	274.057	M03Jan2009	0	0	0	0	0	0	0	0	0	0	0	0	0	0	0	0	0	0	0	0	0	0	0	0	0	0	0	0
M04Jan2009	2009	Jan	M04	1	Estuarine	2	1.5	7.1	0.9	22.99	7.65	15.5	7.87	21.88	6.59	19.91	7.78	1	25.7	294.824	M04Jan2009	0	0	0	0	0	0	0	0	0	0	0	0	0	0	0	0	0	0	0	0	0	0	0	0	0	0	0	0
M04Jan2009	2009	Jan	M04	2	Estuarine	2	1.5	7.1	0.9	22.99	7.65	15.5	7.87	21.88	6.59	19.91	7.78	1	25.7	294.824	M04Jan2009	0	0	0	0	0	0	0	0	0	0	0	0	0	0	0	0	0	0	0	0	0	0	0	0	0	0	0	0
M04Jan2009	2009	Jan	M04	3	Estuarine	2	1.5	7.1	0.9	22.99	7.65	15.5	7.87	21.88	6.59	19.91	7.78	1	25.7	294.824	M04Jan2009	0	0	0	0	0	0	0	0	0	0	0	0	0	0	0	0	0	0	0	0	0	0	0	0	0	0	0	0
M05Jan2009	2009	Jan	M05	1	Estuarine	2	2	4.3	1.2	21.71	7.15	19.19	7.87	21.81	6.06	26.23	7.9	1	24.8	205.9	M05Jan2009	0	0	0	0	0	0	0	0	0	0	0	0	0	0	0	0	0	0	0	0	0	0	0	0	0	0	0	0
M05Jan2009	2009	Jan	M05	2	Estuarine	2	2	4.3	1.2	21.71	7.15	19.19	7.87	21.81	6.06	26.23	7.9	1	24.8	205.9	M05Jan2009	0	0	0	0	0	0	0	0	0	0	0	0	0	0	0	0	0	0	0	0	0	0	0	0	0	0	0	0
M05Jan2009	2009	Jan	M05	3	Estuarine	2	2	4.3	1.2	21.71	7.15	19.19	7.87	21.81	6.06	26.23	7.9	1	24.8	205.9	M05Jan2009	0	0	0	0	0	0	0	0	0	0	0	0	0	0	0	0	0	0	0	0	0	0	0	0	0	0	0	0
M06Jan2009	2009	Jan	M06	1	Estuarine	2	2.6	3.43	1.4	21.56	7.38	23.72	7.94	21.84	6.38	30.57	7.93	0	23.4	209.514	M06Jan2009	0	0	0	0	0	0	0	0	0	0	0	0	0	0	0	0	0	0	0	0	0	0	0	0	0	0	0	0
M06Jan2009	2009	Jan	M06	2	Estuarine	2	2.6	3.43	1.4	21.56	7.38	23.72	7.94	21.84	6.38	30.57	7.93	0	23.4	209.514	M06Jan2009	0	0	0	0	0	0	0	0	0	0	0	0	0	0	0	0	0	0	0	0	0	0	0	0	0	0	0	0
M06Jan2009	2009	Jan	M06	3	Estuarine	2	2.6	3.43	1.4	21.56	7.38	23.72	7.94	21.84	6.38	30.57	7.93	0	23.4	209.514	M06Jan2009	0	0	0	0	0	0	0	0	0	0	1	0	0	0	0	0	0	0	0	0	0	0	0	0	0	0	0	0
M07Jan2009	2009	Jan	M07	1	Saline	2	1.8	5.96	1.3	22.27	6.69	34.08	8.05	22.4	6.53	35.34	8.07	0	24	85.2171	M07Jan2009	0	5	0	0	0	0	0	0	0	0	0	0	0	0	0	0	0	0	0	2	0	0	0	0	0	0	0	0
M07Jan2009	2009	Jan	M07	2	Saline	2	1.8	5.96	1.3	22.27	6.69	34.08	8.05	22.4	6.53	35.34	8.07	0	24	85.2171	M07Jan2009	0	5	0	0	0	0	0	0	0	1	0	0	0	0	1	0	0	0	0	0	0	0	0	0	0	0	0	0
M07Jan2009	2009	Jan	M07	3	Saline	2	1.8	5.96	1.3	22.27	6.69	34.08	8.05	22.4	6.53	35.34	8.07	0	24	85.2171	M07Jan2009	0	0	0	0	0	0	0	0	0	0	0	0	0	0	1	0	0	0	0	1	0	0	0	0	0	0	0	0
M08Jan2009	2009	Jan	M08	1	Saline	2	1.2	6.44	1	21.68	6.49	32.93	7.89	21.68	6.37	33.02	7.88	0	21.8	108.817	M08Jan2009	0	0	0	0	0	0	0	0	0	6	0	0	0	0	0	0	0	0	0	1	0	0	0	0	0	0	0	1
M08Jan2009	2009	Jan	M08	2	Saline	2	1.2	6.44	1	21.68	6.49	32.93	7.89	21.68	6.37	33.02	7.88	0	21.8	108.817	M08Jan2009	0	0	0	0	0	0	0	0	0	16	0	0	0	0	0	0	0	0	0	0	0	0	0	0	0	0	0	2
M08Jan2009	2009	Jan	M08	3	Saline	2	1.2	6.44	1	21.68	6.49	32.93	7.89	21.68	6.37	33.02	7.88	0	21.8	108.817	M08Jan2009	0	0	0	0	0	0	0	0	0	1	0	0	0	0	0	0	0	0	0	0	0	0	0	0	0	0	0	3
M09Jan2009	2009	Jan	M09	1	Saline	2	1.4	6	1.3	21.85	6.76	34.7	8.05	21.85	6.52	34.71	8.05	0	22.4	178.814	M09Jan2009	0	0	0	0	0	0	0	0	0	0	1	0	0	0	0	0	0	0	0	0	0	0	0	0	0	0	0	0
M09Jan2009	2009	Jan	M09	2	Saline	2	1.4	6	1.3	21.85	6.76	34.7	8.05	21.85	6.52	34.71	8.05	0	22.4	178.814	M09Jan2009	0	3	0	0	0	0	0	0	0	0	0	0	0	0	0	0	0	0	0	0	0	0	0	0	0	0	0	0
M09Jan2009	2009	Jan	M09	3	Saline	2	1.4	6	1.3	21.85	6.76	34.7	8.05	21.85	6.52	34.71	8.05	0	22.4	178.814	M09Jan2009	0	0	0	0	0	0	0	0	0	0	1	0	0	0	0	1	0	0	0	0	0	0	0	0	0	0	0	0
M10Jan2009	2009	Jan	M10	1	Saline	2	1.5	5.87	1.4	18.2	7.45	35.8	8.04	18.2	7.26	35	8.05	0	14.2	80.7917	M10Jan2009	0	0	0	0	0	0	0	0	0	0	0	0	0	0	0	0	0	0	0	0	0	0	0	0	0	0	0	0
M10Jan2009	2009	Jan	M10	2	Saline	2	1.5	5.87	1.4	18.2	7.45	35.8	8.04	18.2	7.26	35	8.05	0	14.2	80.7917	M10Jan2009	0	0	0	0	0	0	0	0	0	0	0	0	0	0	0	0	0	0	0	0	0	0	0	0	0	0	0	0
M10Jan2009	2009	Jan	M10	3	Saline	2	1.5	5.87	1.4	18.2	7.45	35.8	8.04	18.2	7.26	35	8.05	0	14.2	80.7917	M10Jan2009	0	0	0	0	0	0	0	0	0	0	0	0	0	0	0	0	0	0	0	0	0	0	0	0	0	0	0	0
M11Jan2009	2009	Jan	M11	1	Saline	2	1.6	17.4	0.6	19.78	7.33	34.71	8.13	19.75	7.15	34.72	8.13	0	19.1	79.315	M11Jan2009	0	0	0	0	0	0	0	0	0	0	0	0	0	0	0	0	0	0	0	0	0	0	0	0	0	0	0	0
M11Jan2009	2009	Jan	M11	2	Saline	2	1.6	17.4	0.6	19.78	7.33	34.71	8.13	19.75	7.15	34.72	8.13	0	19.1	79.315	M11Jan2009	0	0	0	0	0	0	0	0	0	0	0	0	0	0	0	0	0	0	0	0	0	0	0	0	0	0	0	0
M11Jan2009	2009	Jan	M11	3	Saline	2	1.6	17.4	0.6	19.78	7.33	34.71	8.13	19.75	7.15	34.72	8.13	0	19.1	79.315	M11Jan2009	0	0	0	0	0	0	0	0	0	0	0	0	0	0	0	0	0	0	0	0	0	0	0	0	0	0	0	0
M12Jan2009	2009	Jan	M12	1	Saline	2	1.1	9.69	9.9	22.66	6.41	35.06	8.01	22.64	6.43	35.08	8.02	0	25.9	165.017	M12Jan2009	0	0	0	0	0	0	0	0	0	0	0	0	0	0	0	0	0	0	0	0	0	0	0	0	0	0	0	0
M12Jan2009	2009	Jan	M12	2	Saline	2	1.1	9.69	9.9	22.66	6.41	35.06	8.01	22.64	6.43	35.08	8.02	0	25.9	165.017	M12Jan2009	0	0	0	0	0	0	0	0	0	0	0	0	0	0	0	0	0	0	0	0	0	0	0	0	0	0	0	0
M12Jan2009	2009	Jan	M12	3	Saline	2	1.1	9.69	9.9	22.66	6.41	35.06	8.01	22.64	6.43	35.08	8.02	0	25.9	165.017	M12Jan2009	0	0	0	0	0	0	0	0	0	0	0	0	0	0	0	0	0	0	0	0	0	0	0	0	0	0	0	0
M13Jan2009	2009	Jan	M13	1	Saline	2	1	11.6	0.9	22.32	6.41	34.81	8.01	22.32	6.48	34.82	8.01	0	25.5	183.167	M13Jan2009	0	0	0	0	0	0	0	0	0	0	0	0	0	0	0	0	0	0	0	0	0	0	0	0	0	0	0	0
M13Jan2009	2009	Jan	M13	2	Saline	2	1	11.6	0.9	22.32	6.41	34.81	8.01	22.32	6.48	34.82	8.01	0	25.5	183.167	M13Jan2009	0	0	0	0	0	0	0	0	0	0	0	0	0	0	0	0	0	0	0	0	0	0	0	0	0	0	0	0
M13Jan2009	2009	Jan	M13	3	Saline	2	1	11.6	0.9	22.32	6.41	34.81	8.01	22.32	6.48	34.82	8.01	0	25.5	183.167	M13Jan2009	0	0	0	0	0	0	0	0	0	0	0	0	0	0	0	0	0	0	0	0	0	0	0	0	0	0	0	0
M14Jan2009	2009	Jan	M14	1	Estuarine	2	0	6.66	0.9	22.4	8.27	7.81	7.92	21.92	5.52	13.79	7.64	0	26.2	91.1083	M14Jan2009	0	0	0	0	0	0	0	0	0	0	0	0	0	0	0	0	0	0	0	0	0	0	0	0	0	0	0	0
M14Jan2009	2009	Jan	M14	2	Estuarine	2	0	6.66	0.9	22.4	8.27	7.81	7.92	21.92	5.52	13.79	7.64	0	26.2	91.1083	M14Jan2009	0	0	0	0	0	0	0	0	0	0	0	0	0	0	0	0	0	0	0	0	0	1	0	0	0	0	0	0
M14Jan2009	2009	Jan	M14	3	Estuarine	2	0	6.66	0.9	22.4	8.27	7.81	7.92	21.92	5.52	13.79	7.64	0	26.2	91.1083	M14Jan2009	0	0	0	0	0	0	0	0	0	0	0	0	0	0	0	0	0	0	0	0	0	0	0	0	0	0	0	0
M15Jan2009	2009	Jan	M15	1	Fresh	2	1.8	7.13	0.9	20.72	7.08	0.91	7.65	20.6	6.85	0.92	7.6	0	23.8	111.3	M15Jan2009	0	0	0	0	0	0	0	0	0	0	0	0	0	0	0	0	0	0	0	0	0	0	0	0	0	0	0	0
M15Jan2009	2009	Jan	M15	2	Fresh	2	1.8	7.13	0.9	20.72	7.08	0.91	7.65	20.6	6.85	0.92	7.6	0	23.8	111.3	M15Jan2009	0	0	0	0	0	0	0	0	0	0	0	0	0	0	0	0	0	0	0	0	0	0	0	0	0	0	0	0
M15Jan2009	2009	Jan	M15	3	Fresh	2	1.8	7.13	0.9	20.72	7.08	0.91	7.65	20.6	6.85	0.92	7.6	0	23.8	111.3	M15Jan2009	0	0	0	0	0	0	0	0	0	0	0	0	0	0	0	0	0	0	0	0	0	0	0	0	0	0	0	0
M01Apr2009	2009	Apr	M01	1	Fresh	2	1.7	7	1.5	26.1	5.61	4.7	7.73	26	5.67	4.8	7.71	0	25.7	114	M01Apr2009	0	0	0	0	0	0	0	0	0	0	0	0	0	0	0	0	0	0	0	0	0	0	0	0	0	0	0	0
M01Apr2009	2009	Apr	M01	2	Fresh	2	1.7	7	1.5	26.1	5.61	4.7	7.73	26	5.67	4.8	7.71	0	25.7	114	M01Apr2009	0	0	0	0	0	0	0	0	0	0	0	0	0	0	0	0	0	0	0	0	0	0	0	0	0	0	0	0
M01Apr2009	2009	Apr	M01	3	Fresh	2	1.7	7	1.5	26.1	5.61	4.7	7.73	26	5.67	4.8	7.71	0	25.7	114	M01Apr2009	0	0	0	0	0	0	0	0	0	0	0	0	0	0	0	0	0	0	0	0	0	0	0	0	0	0	0	0
M02Apr2009	2009	Apr	M02	1	Estuarine	2	2.2	4	1.2	26.2	4.56	17	7.53	26.4	4.45	19.4	7.57	1	23.1	192.6	M02Apr2009	0	0	0	0	0	0	0	0	0	0	0	0	0	0	0	0	0	0	0	0	0	0	0	0	0	0	0	0
M02Apr2009	2009	Apr	M02	2	Estuarine	2	2.2	4	1.2	26.2	4.56	17	7.53	26.4	4.45	19.4	7.57	1	23.1	192.6	M02Apr2009	0	0	0	0	0	0	0	0	0	0	0	0	0	0	0	0	0	0	0	1	0	0	0	0	0	0	0	0
M02Apr2009	2009	Apr	M02	3	Estuarine	2	2.2	4	1.2	26.2	4.56	17	7.53	26.4	4.45	19.4	7.57	1	23.1	192.6	M02Apr2009	0	0	0	0	0	0	0	0	0	0	0	0	0	0	0	0	0	0	0	0	0	0	0	0	0	0	0	0
M03Apr2009	2009	Apr	M03	1	Estuarine	2	2.7	1.7	1.8	24.4	6.68	23.1	7.9	24.7	5.48	24.7	7.73	1	23.5	274.057	M03Apr2009	0	0	0	0	0	0	0	0	0	0	0	0	0	0	0	0	0	0	0	0	0	0	0	0	0	0	0	0
M03Apr2009	2009	Apr	M03	2	Estuarine	2	2.7	1.7	1.8	24.4	6.68	23.1	7.9	24.7	5.48	24.7	7.73	1	23.5	274.057	M03Apr2009	0	0	0	0	0	0	0	0	0	0	0	0	0	0	0	0	0	0	0	0	0	0	0	0	0	0	0	0
M03Apr2009	2009	Apr	M03	3	Estuarine	2	2.7	1.7	1.8	24.4	6.68	23.1	7.9	24.7	5.48	24.7	7.73	1	23.5	274.057	M03Apr2009	0	0	0	0	0	0	0	0	0	0	0	0	0	0	0	0	0	0	0	0	0	0	0	0	0	0	0	0
M04Apr2009	2009	Apr	M04	1	Estuarine	2	1.6	2.8	1.3	24.9	5.2	20.9	7.73	25	5.12	25.5	7.71	1	25.8	294.824	M04Apr2009	0	0	0	0	0	0	0	0	0	0	0	0	0	0	0	0	0	0	0	0	0	0	0	0	0	0	0	0
M04Apr2009	2009	Apr	M04	2	Estuarine	2	1.6	2.8	1.3	24.9	5.2	20.9	7.73	25	5.12	25.5	7.71	1	25.8	294.824	M04Apr2009	0	0	0	0	0	0	0	0	0	0	0	0	0	0	0	0	0	0	0	0	0	0	0	0	0	0	0	0
M04Apr2009	2009	Apr	M04	3	Estuarine	2	1.6	2.8	1.3	24.9	5.2	20.9	7.73	25	5.12	25.5	7.71	1	25.8	294.824	M04Apr2009	0	0	0	0	0	0	0	0	0	0	0	0	0	0	0	0	0	0	0	0	0	0	0	0	0	0	0	0
M05Apr2009	2009	Apr	M05	1	Estuarine	2	2	2.4	1.7	25	6.12	25.1	7.86	24.9	5.3	28.6	7.89	1	25.6	205.9	M05Apr2009	0	0	0	0	0	0	0	0	0	0	0	0	0	0	0	0	0	0	0	0	0	0	0	0	0	0	0	0
M05Apr2009	2009	Apr	M05	2	Estuarine	2	2	2.4	1.7	25	6.12	25.1	7.86	24.9	5.3	28.6	7.89	1	25.6	205.9	M05Apr2009	0	0	0	0	0	0	0	0	0	0	0	0	0	0	0	0	0	0	0	0	0	0	0	0	0	0	0	0
M05Apr2009	2009	Apr	M05	3	Estuarine	2	2	2.4	1.7	25	6.12	25.1	7.86	24.9	5.3	28.6	7.89	1	25.6	205.9	M05Apr2009	0	0	0	0	0	0	0	0	0	0	0	0	0	0	0	0	0	0	0	0	0	0	0	0	0	0	0	0
M06Apr2009	2009	Apr	M06	1	Estuarine	2	2.4	3.9	1.5	25.1	6.23	28.6	7.93	24.6	5.87	30.1	7.94	1	26.1	209.514	M06Apr2009	0	0	0	0	0	0	0	0	0	0	0	0	0	0	0	0	0	0	0	0	0	0	0	0	0	0	0	0
M06Apr2009	2009	Apr	M06	2	Estuarine	2	2.4	3.9	1.5	25.1	6.23	28.6	7.93	24.6	5.87	30.1	7.94	1	26.1	209.514	M06Apr2009	0	0	0	0	0	0	0	0	0	0	0	0	0	0	0	0	0	0	0	0	0	0	0	0	0	0	0	0
M06Apr2009	2009	Apr	M06	3	Estuarine	2	2.4	3.9	1.5	25.1	6.23	28.6	7.93	24.6	5.87	30.1	7.94	1	26.1	209.514	M06Apr2009	0	0	0	0	0	0	0	0	0	0	0	0	0	0	0	0	0	0	0	0	0	0	0	0	0	0	0	0
M07Apr2009	2009	Apr	M07	1	Saline	2	1.8	6.5	1.4	25.1	6.16	34.2	8.05	25.1	5.91	34.2	8.05	0	28.6	85.2171	M07Apr2009	0	1	0	0	0	0	0	0	0	0	0	0	0	0	0	0	0	0	0	0	0	0	0	0	0	0	0	0
M07Apr2009	2009	Apr	M07	2	Saline	2	1.8	6.5	1.4	25.1	6.16	34.2	8.05	25.1	5.91	34.2	8.05	0	28.6	85.2171	M07Apr2009	0	1	0	0	0	0	0	0	0	0	0	0	0	0	0	0	0	0	0	0	0	0	0	0	0	0	0	0
M07Apr2009	2009	Apr	M07	3	Saline	2	1.8	6.5	1.4	25.1	6.16	34.2	8.05	25.1	5.91	34.2	8.05	0	28.6	85.2171	M07Apr2009	0	0	0	0	0	0	0	0	0	0	0	0	0	0	0	0	0	0	0	0	0	0	0	0	0	0	0	0
M08Apr2009	2009	Apr	M08	1	Saline	2	1.2	11.4	0.8	25.9	5.54	34.9	7.97	25.9	5.47	35.1	7.97	0	27.1	108.817	M08Apr2009	0	0	0	0	0	0	0	0	0	2	0	0	0	0	0	0	0	0	0	0	0	0	0	0	0	0	0	1
M08Apr2009	2009	Apr	M08	2	Saline	2	1.2	11.4	0.8	25.9	5.54	34.9	7.97	25.9	5.47	35.1	7.97	0	27.1	108.817	M08Apr2009	0	1	0	0	0	0	0	0	0	0	1	0	0	0	0	0	0	0	0	0	0	0	0	0	0	0	0	1
M08Apr2009	2009	Apr	M08	3	Saline	2	1.2	11.4	0.8	25.9	5.54	34.9	7.97	25.9	5.47	35.1	7.97	0	27.1	108.817	M08Apr2009	0	0	0	0	0	0	0	0	0	1	0	0	0	0	0	0	0	0	0	0	0	0	0	0	0	0	0	7
M09Apr2009	2009	Apr	M09	1	Saline	2	1.6	6.7	9.9	24.9	5.89	35.7	8.08	24.9	5.63	35.7	8.08	0	28.5	178.814	M09Apr2009	0	0	0	0	0	0	0	0	0	0	0	0	0	0	0	0	0	0	0	0	0	0	0	0	0	0	0	0
M09Apr2009	2009	Apr	M09	2	Saline	2	1.6	6.7	9.9	24.9	5.89	35.7	8.08	24.9	5.63	35.7	8.08	0	28.5	178.814	M09Apr2009	0	1	0	0	0	0	0	0	0	0	0	0	0	0	0	0	0	0	0	0	0	0	0	0	0	0	0	0
M09Apr2009	2009	Apr	M09	3	Saline	2	1.6	6.7	9.9	24.9	5.89	35.7	8.08	24.9	5.63	35.7	8.08	0	28.5	178.814	M09Apr2009	0	0	0	0	0	0	0	0	0	0	1	0	0	0	0	0	0	0	0	0	0	0	0	0	0	0	0	0
M10Apr2009	2009	Apr	M10	1	Saline	2	1.4	9.1	1	25.7	5.49	36.1	7.79	25.7	5.39	36.2	7.97	0	28.1	80.7917	M10Apr2009	0	0	0	0	0	0	0	0	0	0	0	0	0	0	0	0	0	0	0	0	0	0	0	0	0	0	0	0
M10Apr2009	2009	Apr	M10	2	Saline	2	1.4	9.1	1	25.7	5.49	36.1	7.79	25.7	5.39	36.2	7.97	0	28.1	80.7917	M10Apr2009	0	0	0	0	0	0	0	0	0	0	1	0	0	0	0	0	0	0	0	0	0	0	0	0	0	0	0	0
M10Apr2009	2009	Apr	M10	3	Saline	2	1.4	9.1	1	25.7	5.49	36.1	7.79	25.7	5.39	36.2	7.97	0	28.1	80.7917	M10Apr2009	0	0	0	0	0	0	0	0	0	0	0	0	0	0	0	0	0	0	0	0	0	0	0	0	0	0	0	0
M11Apr2009	2009	Apr	M11	1	Saline	2	2	13	1	25.9	5.76	36.4	8.04	25.9	5.63	36.4	8.03	0	28.7	79.315	M11Apr2009	0	0	0	0	0	0	0	0	0	0	0	0	0	0	0	0	0	0	0	0	0	0	0	0	0	0	0	0
M11Apr2009	2009	Apr	M11	2	Saline	2	2	13	1	25.9	5.76	36.4	8.04	25.9	5.63	36.4	8.03	0	28.7	79.315	M11Apr2009	0	0	0	0	0	0	0	0	0	0	0	0	0	0	0	0	0	0	0	0	0	0	0	0	0	0	0	0
M11Apr2009	2009	Apr	M11	3	Saline	2	2	13	1	25.9	5.76	36.4	8.04	25.9	5.63	36.4	8.03	0	28.7	79.315	M11Apr2009	0	0	0	0	0	0	0	0	0	0	0	0	0	0	0	0	0	0	0	0	0	0	0	0	0	0	0	0
M12Apr2009	2009	Apr	M12	1	Saline	2	1.8	7.8	1.3	20.8	5.13	37.9	8.19	20.8	5.32	37.9	8.19	0	9.6	165.017	M12Apr2009	0	2	0	0	0	0	0	0	0	0	1	0	0	0	0	0	0	0	0	1	0	0	0	0	0	0	0	34
M12Apr2009	2009	Apr	M12	2	Saline	2	1.8	7.8	1.3	20.8	5.13	37.9	8.19	20.8	5.32	37.9	8.19	0	9.6	165.017	M12Apr2009	0	0	0	0	0	0	0	0	0	0	0	0	0	0	0	0	0	0	0	0	0	0	0	0	0	0	0	0
M12Apr2009	2009	Apr	M12	3	Saline	2	1.8	7.8	1.3	20.8	5.13	37.9	8.19	20.8	5.32	37.9	8.19	0	9.6	165.017	M12Apr2009	0	15	0	0	0	0	0	0	0	0	1	0	0	0	0	0	0	0	0	0	0	0	0	0	0	0	0	0
M13Apr2009	2009	Apr	M13	1	Saline	2	1.3	6	9.9	19.3	5.34	37.9	8.22	19.3	5.01	37.9	8.24	0	8.2	183.167	M13Apr2009	0	2	0	0	0	0	0	0	0	0	0	0	0	0	0	0	0	0	0	0	0	0	0	0	0	0	0	0
M13Apr2009	2009	Apr	M13	2	Saline	2	1.3	6	9.9	19.3	5.34	37.9	8.22	19.3	5.01	37.9	8.24	0	8.2	183.167	M13Apr2009	0	0	0	0	0	0	0	0	0	0	0	0	0	0	0	0	0	0	0	0	0	0	0	0	0	0	0	0
M13Apr2009	2009	Apr	M13	3	Saline	2	1.3	6	9.9	19.3	5.34	37.9	8.22	19.3	5.01	37.9	8.24	0	8.2	183.167	M13Apr2009	0	1	0	0	0	0	0	0	0	0	0	0	0	0	0	0	0	0	0	2	0	0	0	0	0	0	0	0
M14Apr2009	2009	Apr	M14	1	Estuarine	2	1.8	5.09	0.8	24.9	4.15	12.8	7.69	25.1	5.9	21.7	7.6	1	24.8	91.1083	M14Apr2009	0	0	0	0	0	0	0	0	0	0	0	0	0	0	0	0	0	0	0	0	0	0	0	0	0	0	0	0
M14Apr2009	2009	Apr	M14	2	Estuarine	2	1.8	5.09	0.8	24.9	4.15	12.8	7.69	25.1	5.9	21.7	7.6	1	24.8	91.1083	M14Apr2009	0	0	0	0	0	0	0	0	0	0	0	0	0	0	0	0	0	0	0	0	0	0	0	0	0	0	0	0
M14Apr2009	2009	Apr	M14	3	Estuarine	2	1.8	5.09	0.8	24.9	4.15	12.8	7.69	25.1	5.9	21.7	7.6	1	24.8	91.1083	M14Apr2009	0	0	0	0	0	0	0	0	0	0	0	0	0	0	0	0	0	0	0	1	0	0	0	0	0	0	0	0
M01Jul2009	2009	Jul	M01	1	Fresh	2	1.1	7.7	0.7	31	3.89	0.6	7.45	31	3.88	0.6	7.29	1	32.9	114	M01Jul2009	0	0	0	0	0	0	0	0	0	0	0	0	0	0	0	0	0	0	0	0	0	0	0	0	0	0	0	0
M01Jul2009	2009	Jul	M01	2	Fresh	2	1.1	7.7	0.7	31	3.89	0.6	7.45	31	3.88	0.6	7.29	1	32.9	114	M01Jul2009	0	0	0	0	0	0	0	0	0	0	0	0	0	0	0	0	0	0	0	0	0	0	0	0	0	0	0	0
M01Jul2009	2009	Jul	M01	3	Fresh	2	1.1	7.7	0.7	31	3.89	0.6	7.45	31	3.88	0.6	7.29	1	32.9	114	M01Jul2009	0	0	0	0	0	0	0	0	0	0	0	0	0	0	0	0	0	0	0	0	0	0	0	0	0	0	0	0
M02Jul2009	2009	Jul	M02	1	Estuarine	2	1.1	9.92	9.9	31	3.89	1.1	7.54	30.9	3.6	1.1	7.51	0	32.7	192.6	M02Jul2009	0	0	0	0	0	0	0	0	0	0	0	0	0	0	0	0	0	0	0	0	0	0	0	0	0	0	0	0
M02Jul2009	2009	Jul	M02	2	Estuarine	2	1.1	9.92	9.9	31	3.89	1.1	7.54	30.9	3.6	1.1	7.51	0	32.7	192.6	M02Jul2009	0	0	0	0	0	0	0	0	0	0	0	0	0	0	0	0	0	0	0	0	0	0	0	0	0	0	0	0
M02Jul2009	2009	Jul	M02	3	Estuarine	2	1.1	9.92	9.9	31	3.89	1.1	7.54	30.9	3.6	1.1	7.51	0	32.7	192.6	M02Jul2009	0	0	0	0	0	0	0	0	0	0	0	0	0	0	0	0	0	0	0	0	0	0	0	0	0	0	0	0
M03Jul2009	2009	Jul	M03	1	Estuarine	2	3	3.13	1.1	29.9	5.4	7.1	7.87	29.8	1.52	15	7.1	1	29.2	274.057	M03Jul2009	0	0	0	0	0	0	0	0	0	0	0	0	0	0	0	0	0	0	0	0	0	0	0	0	0	0	0	0
M03Jul2009	2009	Jul	M03	2	Estuarine	2	3	3.13	1.1	29.9	5.4	7.1	7.87	29.8	1.52	15	7.1	1	29.2	274.057	M03Jul2009	0	0	0	0	0	0	0	0	0	0	0	0	0	0	0	0	0	0	0	0	0	0	0	0	0	0	0	0
M03Jul2009	2009	Jul	M03	3	Estuarine	2	3	3.13	1.1	29.9	5.4	7.1	7.87	29.8	1.52	15	7.1	1	29.2	274.057	M03Jul2009	0	0	0	0	0	0	0	0	0	0	0	0	0	0	0	0	0	0	0	0	0	0	0	0	0	0	0	0
M04Jul2009	2009	Jul	M04	1	Estuarine	2	1.8	6.23	1	29.8	4.25	14.2	7.73	29.9	3.32	15.9	7.23	1	28.7	294.824	M04Jul2009	0	0	0	0	0	0	0	0	0	0	0	0	0	0	0	0	0	0	0	0	0	0	0	0	0	0	0	0
M04Jul2009	2009	Jul	M04	2	Estuarine	2	1.8	6.23	1	29.8	4.25	14.2	7.73	29.9	3.32	15.9	7.23	1	28.7	294.824	M04Jul2009	0	0	0	0	0	0	0	0	0	0	0	0	0	0	0	0	0	0	0	0	0	0	0	0	0	0	0	0
M04Jul2009	2009	Jul	M04	3	Estuarine	2	1.8	6.23	1	29.8	4.25	14.2	7.73	29.9	3.32	15.9	7.23	1	28.7	294.824	M04Jul2009	0	0	0	0	0	0	0	0	0	0	0	0	0	0	0	0	0	0	0	0	0	0	0	0	0	0	0	0
M05Jul2009	2009	Jul	M05	1	Estuarine	2	2.3	5.37	1	29.6	5.43	18	7.94	28.7	2.87	24.4	7.25	1	29.6	205.9	M05Jul2009	0	0	0	0	0	0	0	0	0	0	0	0	0	0	0	0	0	0	0	0	0	0	0	0	0	0	0	0
M05Jul2009	2009	Jul	M05	2	Estuarine	2	2.3	5.37	1	29.6	5.43	18	7.94	28.7	2.87	24.4	7.25	1	29.6	205.9	M05Jul2009	0	0	0	0	0	0	0	0	0	0	0	0	0	0	0	0	0	0	0	0	0	0	0	0	0	0	0	0
M05Jul2009	2009	Jul	M05	3	Estuarine	2	2.3	5.37	1	29.6	5.43	18	7.94	28.7	2.87	24.4	7.25	1	29.6	205.9	M05Jul2009	0	0	0	0	0	0	0	0	0	0	0	0	0	0	0	0	0	0	0	0	0	0	0	0	0	0	0	0
M06Jul2009	2009	Jul	M06	1	Estuarine	2	2.9	4.88	1.3	29.5	6.06	19.7	8.02	28	4.11	27.2	7.58	0	29.9	209.514	M06Jul2009	0	0	0	0	0	0	0	0	0	0	0	0	0	0	0	0	0	0	0	0	0	0	0	0	0	0	0	0
M06Jul2009	2009	Jul	M06	2	Estuarine	2	2.9	4.88	1.3	29.5	6.06	19.7	8.02	28	4.11	27.2	7.58	0	29.9	209.514	M06Jul2009	0	0	0	0	0	0	0	0	0	0	0	0	0	0	0	0	0	0	0	0	0	0	0	0	0	0	0	0
M06Jul2009	2009	Jul	M06	3	Estuarine	2	2.9	4.88	1.3	29.5	6.06	19.7	8.02	28	4.11	27.2	7.58	0	29.9	209.514	M06Jul2009	0	0	0	0	0	0	0	0	0	0	0	0	0	0	0	0	0	0	0	0	0	0	0	0	0	0	0	0
M07Jul2009	2009	Jul	M07	1	Saline	2	1.2	4.12	9.9	27.5	4.38	32.6	7.9	27.2	4.34	33.1	7.91	0	30.5	85.2171	M07Jul2009	0	0	0	0	0	0	0	0	0	0	0	0	0	0	0	0	0	0	0	0	0	0	0	0	0	0	0	0
M07Jul2009	2009	Jul	M07	2	Saline	2	1.2	4.12	9.9	27.5	4.38	32.6	7.9	27.2	4.34	33.1	7.91	0	30.5	85.2171	M07Jul2009	0	0	0	0	0	0	0	0	0	0	0	0	0	0	0	3	0	0	0	0	0	0	0	0	0	0	0	0
M07Jul2009	2009	Jul	M07	3	Saline	2	1.2	4.12	9.9	27.5	4.38	32.6	7.9	27.2	4.34	33.1	7.91	0	30.5	85.2171	M07Jul2009	0	0	0	0	0	0	0	0	0	0	0	0	0	0	0	0	0	0	0	0	0	0	0	0	0	0	0	0
M08Jul2009	2009	Jul	M08	1	Saline	2	1.2	6.9	1	30.5	3.66	31.8	7.65	31.8	3.56	31.8	7.56	0	31.5	108.817	M08Jul2009	0	0	0	0	0	0	0	0	19	0	0	0	0	0	0	0	0	0	0	0	0	0	0	0	0	0	0	0
M08Jul2009	2009	Jul	M08	2	Saline	2	1.2	6.9	1	30.5	3.66	31.8	7.65	31.8	3.56	31.8	7.56	0	31.5	108.817	M08Jul2009	0	0	0	0	0	0	0	0	8	0	1	0	0	0	0	0	0	0	0	0	0	0	0	0	0	0	0	0
M08Jul2009	2009	Jul	M08	3	Saline	2	1.2	6.9	1	30.5	3.66	31.8	7.65	31.8	3.56	31.8	7.56	0	31.5	108.817	M08Jul2009	0	0	0	0	0	0	0	0	1	0	0	0	0	0	0	0	0	0	0	0	0	0	0	0	0	0	0	0
M09Jul2009	2009	Jul	M09	1	Saline	2	1.5	2.44	9.9	27.9	4.33	33.1	7.93	27.8	4.41	33.3	7.88	0	30.2	178.814	M09Jul2009	0	0	0	0	0	0	0	1	0	0	0	0	0	0	0	0	0	0	0	0	0	0	0	0	0	0	0	0
M09Jul2009	2009	Jul	M09	2	Saline	2	1.5	2.44	9.9	27.9	4.33	33.1	7.93	27.8	4.41	33.3	7.88	0	30.2	178.814	M09Jul2009	0	0	0	0	0	0	0	2	0	0	0	0	0	0	0	0	0	0	0	0	0	0	0	0	0	0	0	0
M09Jul2009	2009	Jul	M09	3	Saline	2	1.5	2.44	9.9	27.9	4.33	33.1	7.93	27.8	4.41	33.3	7.88	0	30.2	178.814	M09Jul2009	0	0	0	0	0	0	0	0	0	0	0	0	0	0	0	0	0	0	0	0	0	0	0	0	0	0	0	0
M11Jul2009	2009	Jul	M11	1	Saline	2	2	1.05	9.9	29.98	5.51	34.34	8.39	29.96	4.77	34.34	8.38	1	29.5	79.315	M11Jul2009	0	0	0	0	0	0	0	0	0	0	5	0	0	0	0	0	0	0	0	0	0	0	0	0	0	0	0	0
M11Jul2009	2009	Jul	M11	2	Saline	2	2	1.05	9.9	29.98	5.51	34.34	8.39	29.96	4.77	34.34	8.38	1	29.5	79.315	M11Jul2009	0	0	0	0	0	0	0	0	0	0	1	0	0	0	0	0	0	0	0	0	0	0	0	0	0	0	0	0
M11Jul2009	2009	Jul	M11	3	Saline	2	2	1.05	9.9	29.98	5.51	34.34	8.39	29.96	4.77	34.34	8.38	1	29.5	79.315	M11Jul2009	0	0	0	0	0	0	0	0	0	0	1	0	0	0	0	0	0	0	0	0	0	0	0	0	0	0	0	0
M12Jul2009	2009	Jul	M12	1	Saline	2	1.5	1.97	9.9	26.47	5.98	34.16	8.15	25.87	5.87	35.07	8.17	0	31	165.017	M12Jul2009	0	1	0	0	0	0	0	0	0	0	2	0	0	0	0	0	0	0	0	0	0	0	0	0	0	0	0	0
M12Jul2009	2009	Jul	M12	2	Saline	2	1.5	1.97	9.9	26.47	5.98	34.16	8.15	25.87	5.87	35.07	8.17	0	31	165.017	M12Jul2009	0	0	0	0	0	0	0	0	0	0	0	0	0	0	0	0	0	0	0	0	0	0	0	0	0	0	0	0
M12Jul2009	2009	Jul	M12	3	Saline	2	1.5	1.97	9.9	26.47	5.98	34.16	8.15	25.87	5.87	35.07	8.17	0	31	165.017	M12Jul2009	0	0	0	0	0	0	0	0	0	0	0	0	0	0	0	0	0	0	0	0	0	0	0	0	0	0	0	0
M13Jul2009	2009	Jul	M13	1	Saline	2	1.5	2.93	9.9	28.99	4.9	30.38	8.14	28.86	4.46	30.56	8.13	0	30.2	183.167	M13Jul2009	0	6	0	0	0	0	0	0	0	0	0	0	0	0	0	0	0	0	0	0	0	0	0	0	0	0	0	0
M13Jul2009	2009	Jul	M13	2	Saline	2	1.5	2.93	9.9	28.99	4.9	30.38	8.14	28.86	4.46	30.56	8.13	0	30.2	183.167	M13Jul2009	0	0	0	0	0	0	0	0	0	0	0	0	0	0	0	0	0	0	0	0	0	0	0	0	0	0	0	0
M13Jul2009	2009	Jul	M13	3	Saline	2	1.5	2.93	9.9	28.99	4.9	30.38	8.14	28.86	4.46	30.56	8.13	0	30.2	183.167	M13Jul2009	0	1	0	0	0	0	0	0	0	0	0	0	0	0	0	0	0	0	0	0	0	0	0	0	0	0	0	0
M14Jul2009	2009	Jul	M14	1	Estuarine	2	1.1	4.22	1	30.2	3.89	8.6	7.7	30	3.45	8.8	7.51	0	28.1	91.1083	M14Jul2009	0	0	0	0	0	0	0	0	0	0	0	0	0	0	0	0	0	0	0	0	0	0	0	0	0	0	0	0
M14Jul2009	2009	Jul	M14	2	Estuarine	2	1.1	4.22	1	30.2	3.89	8.6	7.7	30	3.45	8.8	7.51	0	28.1	91.1083	M14Jul2009	0	0	0	0	0	0	0	0	0	0	0	0	0	0	0	0	0	0	0	0	0	0	0	0	0	0	0	0
M14Jul2009	2009	Jul	M14	3	Estuarine	2	1.1	4.22	1	30.2	3.89	8.6	7.7	30	3.45	8.8	7.51	0	28.1	91.1083	M14Jul2009	0	0	0	0	0	0	0	0	0	0	0	0	0	0	0	0	0	0	0	0	0	0	0	0	0	0	0	0
M15Jul2009	2009	Jul	M15	1	Fresh	2	1.7	5.62	0.8	31.5	4.39	0.6	7.53	29.6	2.53	0.6	7.46	0	33	111.3	M15Jul2009	0	0	0	0	0	0	0	0	0	0	0	0	0	0	0	0	0	0	0	0	0	0	0	0	0	0	0	0
M15Jul2009	2009	Jul	M15	2	Fresh	2	1.7	5.62	0.8	31.5	4.39	0.6	7.53	29.6	2.53	0.6	7.46	0	33	111.3	M15Jul2009	0	0	0	0	0	0	0	0	0	0	0	0	0	0	0	0	0	0	0	0	0	0	0	0	0	0	0	0
M15Jul2009	2009	Jul	M15	3	Fresh	2	1.7	5.62	0.8	31.5	4.39	0.6	7.53	29.6	2.53	0.6	7.46	0	33	111.3	M15Jul2009	0	0	0	0	0	0	0	0	0	0	0	0	0	0	0	0	0	0	0	0	0	0	0	0	0	0	0	0
M02Sept2009	2009	Sept	M02	1	Estuarine	2	2	0.1	1.5	29.6	3.92	2.2	7.53	29.6	3.11	4.3	7.45	0	28.3	79.315	M02Sept2009	0	0	0	0	0	0	0	0	0	0	0	0	0	0	0	0	0	0	0	0	0	0	0	0	0	0	0	0
M02Sept2009	2009	Sept	M02	2	Estuarine	2	2	0.1	1.5	29.6	3.92	2.2	7.53	29.6	3.11	4.3	7.45	0	28.3	79.315	M02Sept2009	0	0	0	0	0	0	0	0	0	0	0	0	0	0	0	0	0	0	0	0	0	0	0	0	0	0	0	0
M02Sept2009	2009	Sept	M02	3	Estuarine	2	2	0.1	1.5	29.6	3.92	2.2	7.53	29.6	3.11	4.3	7.45	0	28.3	79.315	M02Sept2009	0	0	0	0	0	0	0	0	0	0	0	0	0	0	0	0	0	0	0	0	0	0	0	0	0	0	0	0
M03Sept2009	2009	Sept	M03	1	Estuarine	2	3.2	1.5	1.3	29.2	6.71	6.2	7.77	30.6	4.21	14.7	7.66	1	25.1	192.6	M03Sept2009	0	0	0	0	0	0	0	0	0	0	0	0	0	0	0	0	0	0	0	0	0	0	0	0	0	0	0	0
M03Sept2009	2009	Sept	M03	2	Estuarine	2	3.2	1.5	1.3	29.2	6.71	6.2	7.77	30.6	4.21	14.7	7.66	1	25.1	192.6	M03Sept2009	0	0	0	0	0	0	0	0	0	0	0	0	0	0	0	0	0	0	0	0	0	0	0	0	0	0	0	0
M03Sept2009	2009	Sept	M03	3	Estuarine	2	3.2	1.5	1.3	29.2	6.71	6.2	7.77	30.6	4.21	14.7	7.66	1	25.1	192.6	M03Sept2009	0	0	0	0	0	0	0	0	0	0	0	0	0	0	0	0	0	0	0	0	0	0	0	0	0	0	0	0
M05Sept2009	2009	Sept	M05	1	Estuarine	2	2.7	2.7	1.3	29.1	6.24	11.9	7.8	30.3	4.02	23.7	7.79	0	24.9	274.057	M05Sept2009	0	0	0	0	0	0	0	0	0	0	0	0	0	0	0	0	0	0	0	0	0	0	0	0	0	0	0	0
M05Sept2009	2009	Sept	M05	2	Estuarine	2	2.7	2.7	1.3	29.1	6.24	11.9	7.8	30.3	4.02	23.7	7.79	0	24.9	274.057	M05Sept2009	0	0	0	0	0	0	0	0	0	0	0	0	0	0	0	0	0	0	0	0	0	0	0	0	0	0	0	0
M05Sept2009	2009	Sept	M05	3	Estuarine	2	2.7	2.7	1.3	29.1	6.24	11.9	7.8	30.3	4.02	23.7	7.79	0	24.9	274.057	M05Sept2009	0	0	0	0	0	0	0	0	0	0	0	0	0	0	0	0	0	0	0	0	0	0	0	0	0	0	0	0
M06Sept2009	2009	Sept	M06	1	Estuarine	2	2.9	2.4	1.4	29	6.86	15.9	7.91	30.1	5.4	28.3	7.99	0	25.4	205.9	M06Sept2009	0	0	0	0	0	0	0	0	0	0	0	0	0	0	0	0	0	0	0	0	0	0	0	0	0	0	0	0
M06Sept2009	2009	Sept	M06	2	Estuarine	2	2.9	2.4	1.4	29	6.86	15.9	7.91	30.1	5.4	28.3	7.99	0	25.4	205.9	M06Sept2009	0	0	0	0	0	0	0	0	0	0	0	0	0	0	0	0	0	0	0	1	0	0	0	0	0	0	0	0
M06Sept2009	2009	Sept	M06	3	Estuarine	2	2.9	2.4	1.4	29	6.86	15.9	7.91	30.1	5.4	28.3	7.99	0	25.4	205.9	M06Sept2009	0	0	0	0	0	0	0	0	0	0	0	0	0	0	0	0	0	0	0	0	0	0	0	0	0	0	0	0
M07Sept2009	2009	Sept	M07	1	Saline	2	1.9	2.9	9.9	29.3	6.31	30.2	8.06	29.4	5.89	32.7	8.08	0	25.6	209.514	M07Sept2009	0	0	0	0	0	0	0	0	0	0	0	0	0	0	0	0	0	0	0	2	0	0	0	0	0	0	0	0
M07Sept2009	2009	Sept	M07	2	Saline	2	1.9	2.9	9.9	29.3	6.31	30.2	8.06	29.4	5.89	32.7	8.08	0	25.6	209.514	M07Sept2009	0	0	0	0	0	0	0	0	0	0	0	0	0	0	0	3	0	0	0	2	0	0	0	0	0	0	0	0
M07Sept2009	2009	Sept	M07	3	Saline	2	1.9	2.9	9.9	29.3	6.31	30.2	8.06	29.4	5.89	32.7	8.08	0	25.6	209.514	M07Sept2009	0	0	0	0	0	0	0	0	0	0	0	0	0	0	0	0	0	0	0	1	0	0	0	0	0	0	0	0
M08Sept2009	2009	Sept	M08	1	Saline	2	1.3	5.9	1	29.6	5.36	27.1	7.74	29.7	4.67	27.5	7.66	0	26.4	85.2171	M08Sept2009	0	0	0	0	0	0	4	0	0	0	3	0	0	0	0	0	0	0	0	0	0	0	0	0	0	0	0	0
M08Sept2009	2009	Sept	M08	2	Saline	2	1.3	5.9	1	29.6	5.36	27.1	7.74	29.7	4.67	27.5	7.66	0	26.4	85.2171	M08Sept2009	0	0	0	0	0	0	2	0	0	0	4	0	0	0	0	0	0	0	0	0	0	0	0	0	0	0	0	1
M08Sept2009	2009	Sept	M08	3	Saline	2	1.3	5.9	1	29.6	5.36	27.1	7.74	29.7	4.67	27.5	7.66	0	26.4	85.2171	M08Sept2009	0	0	0	0	0	0	4	0	0	0	4	0	0	0	0	0	0	0	0	0	0	0	0	0	0	0	0	0
M09Sept2009	2009	Sept	M09	1	Saline	2	1.7	7.2	1.4	29.1	7.05	29.7	8.12	29.3	4.94	33.4	8.06	0	26.1	108.817	M09Sept2009	0	0	0	0	0	0	0	0	0	1	0	0	0	0	0	0	0	0	0	0	0	0	0	0	0	0	0	0
M09Sept2009	2009	Sept	M09	2	Saline	2	1.7	7.2	1.4	29.1	7.05	29.7	8.12	29.3	4.94	33.4	8.06	0	26.1	108.817	M09Sept2009	0	0	0	0	0	0	0	0	0	0	0	0	0	0	0	0	0	0	0	0	0	0	0	0	0	0	0	0
M09Sept2009	2009	Sept	M09	3	Saline	2	1.7	7.2	1.4	29.1	7.05	29.7	8.12	29.3	4.94	33.4	8.06	0	26.1	108.817	M09Sept2009	0	0	0	0	0	0	0	0	0	0	0	0	0	0	0	0	0	0	0	0	0	0	0	0	0	0	0	0
M11Oct2009	2009	Oct	M11	1	Saline	2	2.1	0	1.2	28.25	5.37	31.25	8.18	28.21	5.28	31.26	8.18	0	28.2	178.814	M11Oct2009	0	0	0	0	0	0	0	0	0	0	1	0	0	0	0	0	0	0	0	0	0	0	0	0	0	0	0	0
M11Oct2009	2009	Oct	M11	2	Saline	2	2.1	0	1.2	28.25	5.37	31.25	8.18	28.21	5.28	31.26	8.18	0	28.2	178.814	M11Oct2009	0	0	0	0	0	0	0	0	0	0	1	0	0	0	0	0	0	0	0	0	0	0	0	0	0	0	0	0
M11Oct2009	2009	Oct	M11	3	Saline	2	2.1	0	1.2	28.25	5.37	31.25	8.18	28.21	5.28	31.26	8.18	0	28.2	178.814	M11Oct2009	0	0	0	0	0	0	0	0	0	0	0	0	0	0	0	0	0	0	0	0	0	0	0	0	0	0	0	0
M14Sept2009	2009	Sept	M14	1	Estuarine	2	1.1	3.9	0.7	29	4.91	1	7.45	29.3	4.94	1.35	7.43	1	25.5	91.1083	M14Sept2009	0	0	0	0	0	0	0	0	0	0	0	0	0	0	0	0	0	0	0	0	0	0	0	0	0	0	0	0
M14Sept2009	2009	Sept	M14	2	Estuarine	2	1.1	3.9	0.7	29	4.91	1	7.45	29.3	4.94	1.35	7.43	1	25.5	91.1083	M14Sept2009	0	0	0	0	0	0	0	0	0	0	0	0	0	0	0	0	0	0	0	0	0	0	0	0	0	0	0	0
M14Sept2009	2009	Sept	M14	3	Estuarine	2	1.1	3.9	0.7	29	4.91	1	7.45	29.3	4.94	1.35	7.43	1	25.5	91.1083	M14Sept2009	0	0	0	0	0	0	0	0	0	0	0	0	0	0	0	0	0	0	0	0	0	0	0	0	0	0	0	0
M01Jan2010	2010	Jan	M01	1	Fresh	2	1.4	4.21	1.2	16.85	10.55	0.91	7.47	16.85	10.4	0.92	7.47	1	11.5	114	M01Jan2010	0	0	0	0	0	0	0	0	0	0	0	0	0	0	0	0	0	0	0	0	0	0	0	0	0	0	0	0
M01Jan2010	2010	Jan	M01	2	Fresh	2	1.4	4.21	1.2	16.85	10.55	0.91	7.47	16.85	10.4	0.92	7.47	1	11.5	114	M01Jan2010	0	0	0	0	0	0	0	0	0	0	0	0	0	0	0	0	0	0	0	0	0	0	0	0	0	0	0	0
M01Jan2010	2010	Jan	M01	3	Fresh	2	1.4	4.21	1.2	16.85	10.55	0.91	7.47	16.85	10.4	0.92	7.47	1	11.5	114	M01Jan2010	0	0	0	0	0	0	0	0	0	0	0	0	0	0	0	0	0	0	0	0	0	0	0	0	0	0	0	0
M02Jan2010	2010	Jan	M02	1	Estuarine	2	1.6	3.13	1	15.82	11.3	5.16	7.41	15.6	11.34	5.46	7.39	1	11.2	192.6	M02Jan2010	0	0	0	0	0	0	0	0	0	0	0	0	0	0	0	0	0	0	0	0	0	0	0	0	0	0	0	0
M02Jan2010	2010	Jan	M02	2	Estuarine	2	1.6	3.13	1	15.82	11.3	5.16	7.41	15.6	11.34	5.46	7.39	1	11.2	192.6	M02Jan2010	0	0	0	0	0	0	0	0	0	0	0	0	0	0	0	0	0	0	0	0	0	0	0	0	0	0	0	0
M02Jan2010	2010	Jan	M02	3	Estuarine	2	1.6	3.13	1	15.82	11.3	5.16	7.41	15.6	11.34	5.46	7.39	1	11.2	192.6	M02Jan2010	0	0	0	0	0	0	0	0	0	0	0	0	0	0	0	0	0	0	0	0	0	0	0	0	0	0	0	0
M03Jan2010	2010	Jan	M03	1	Estuarine	2	3.1	1.7	2.2	10.94	10.43	16.76	7.09	10.92	9.54	20.59	7.1	1	11.9	274.057	M03Jan2010	0	0	0	0	0	0	0	0	0	0	0	0	0	0	0	0	0	0	0	0	0	0	0	0	0	0	0	0
M03Jan2010	2010	Jan	M03	2	Estuarine	2	3.1	1.7	2.2	10.94	10.43	16.76	7.09	10.92	9.54	20.59	7.1	1	11.9	274.057	M03Jan2010	0	0	0	0	0	0	0	0	0	0	0	0	0	0	0	0	0	0	0	0	0	0	0	0	0	0	0	0
M03Jan2010	2010	Jan	M03	3	Estuarine	2	3.1	1.7	2.2	10.94	10.43	16.76	7.09	10.92	9.54	20.59	7.1	1	11.9	274.057	M03Jan2010	0	0	0	0	0	0	0	0	0	0	0	0	0	0	0	0	0	0	0	0	0	0	0	0	0	0	0	0
M05Jan2010	2010	Jan	M05	1	Estuarine	2	2.5	4.98	2	11.41	9.89	19.89	7.13	11.37	9.65	25.45	7.16	1	15.4	205.9	M05Jan2010	0	0	0	0	0	0	0	0	0	0	0	0	0	0	0	0	0	0	0	0	0	0	0	0	0	0	0	0
M05Jan2010	2010	Jan	M05	2	Estuarine	2	2.5	4.98	2	11.41	9.89	19.89	7.13	11.37	9.65	25.45	7.16	1	15.4	205.9	M05Jan2010	0	0	0	0	0	0	0	0	0	0	0	0	0	0	0	0	0	0	0	0	0	0	0	0	0	0	0	0
M05Jan2010	2010	Jan	M05	3	Estuarine	2	2.5	4.98	2	11.41	9.89	19.89	7.13	11.37	9.65	25.45	7.16	1	15.4	205.9	M05Jan2010	0	0	0	0	0	0	0	0	0	0	0	0	0	0	0	0	0	0	0	0	0	0	0	0	0	0	0	0
M06Jan2010	2010	Jan	M06	1	Estuarine	2	2.7	4.25	2	11.48	9.79	25.9	7.14	11.61	9.48	29.52	7.15	0	14.4	209.514	M06Jan2010	0	1	0	0	0	0	0	0	0	0	2	0	0	0	0	1	0	0	0	0	0	0	0	0	0	0	0	0
M06Jan2010	2010	Jan	M06	2	Estuarine	2	2.7	4.25	2	11.48	9.79	25.9	7.14	11.61	9.48	29.52	7.15	0	14.4	209.514	M06Jan2010	0	0	0	0	0	0	0	0	0	0	5	0	0	0	0	0	0	0	0	0	0	0	0	0	0	0	0	0
M06Jan2010	2010	Jan	M06	3	Estuarine	2	2.7	4.25	2	11.48	9.79	25.9	7.14	11.61	9.48	29.52	7.15	0	14.4	209.514	M06Jan2010	0	0	0	0	0	0	5	0	0	0	7	0	0	0	0	0	0	0	0	0	0	0	0	0	0	0	0	0
M07Jan2010	2010	Jan	M07	1	Saline	2	2.1	1.16	9.9	14.71	8.66	34.04	7.34	15	8.35	34.56	7.36	0	18.8	85.2171	M07Jan2010	0	0	0	0	0	0	1	0	0	0	0	0	0	0	0	0	0	0	0	0	0	0	0	0	0	0	0	0
M07Jan2010	2010	Jan	M07	2	Saline	2	2.1	1.16	9.9	14.71	8.66	34.04	7.34	15	8.35	34.56	7.36	0	18.8	85.2171	M07Jan2010	0	0	0	0	0	0	0	0	0	0	0	0	0	0	0	0	0	0	0	0	0	0	0	0	0	0	0	0
M07Jan2010	2010	Jan	M07	3	Saline	2	2.1	1.16	9.9	14.71	8.66	34.04	7.34	15	8.35	34.56	7.36	0	18.8	85.2171	M07Jan2010	1	0	0	0	0	0	3	0	0	0	0	0	0	0	0	0	0	0	0	0	0	0	0	0	0	0	0	0
M08Jan2010	2010	Jan	M08	1	Saline	2	1.1	1.39	9.9	12.65	9.78	31.01	7.25	12.59	9.79	31.01	7.26	0	16.6	108.817	M08Jan2010	0	0	0	0	0	0	16	0	0	0	5	0	0	0	0	0	0	0	0	2	0	0	0	0	0	0	0	0
M08Jan2010	2010	Jan	M08	2	Saline	2	1.1	1.39	9.9	12.65	9.78	31.01	7.25	12.59	9.79	31.01	7.26	0	16.6	108.817	M08Jan2010	0	1	0	0	0	0	10	0	0	0	4	0	0	0	0	0	0	0	0	0	0	0	0	0	0	0	0	0
M08Jan2010	2010	Jan	M08	3	Saline	2	1.1	1.39	9.9	12.65	9.78	31.01	7.25	12.59	9.79	31.01	7.26	0	16.6	108.817	M08Jan2010	0	0	0	0	0	0	5	0	0	0	2	0	0	0	0	0	0	0	0	1	0	0	0	0	0	0	0	0
M09Jan2010	2010	Jan	M09	1	Saline	2	1.5	4.58	9.9	14.35	8.51	34.84	7.3	15.21	8.08	35.33	7.35	0	16.2	178.814	M09Jan2010	0	0	0	0	0	0	1	0	0	0	0	0	0	0	0	0	0	0	0	0	0	0	0	0	0	0	0	0
M09Jan2010	2010	Jan	M09	2	Saline	2	1.5	4.58	9.9	14.35	8.51	34.84	7.3	15.21	8.08	35.33	7.35	0	16.2	178.814	M09Jan2010	0	1	0	0	0	0	1	0	0	0	5	0	0	0	0	0	0	0	0	0	0	0	0	0	0	0	0	0
M09Jan2010	2010	Jan	M09	3	Saline	2	1.5	4.58	9.9	14.35	8.51	34.84	7.3	15.21	8.08	35.33	7.35	0	16.2	178.814	M09Jan2010	0	0	0	0	0	0	1	0	0	0	1	0	0	0	0	0	0	0	0	0	0	0	0	0	0	0	0	0
M12Jan2010	2010	Jan	M12	1	Saline	2	1.7	2.74	9.9	13.01	8.71	33.85	7.53	12.99	8.55	34.29	7.53	0	18.4	165.017	M12Jan2010	0	0	0	0	0	0	0	0	0	0	0	0	0	0	0	0	0	0	0	0	0	0	0	0	0	0	0	0
M12Jan2010	2010	Jan	M12	2	Saline	2	1.7	2.74	9.9	13.01	8.71	33.85	7.53	12.99	8.55	34.29	7.53	0	18.4	165.017	M12Jan2010	0	0	0	0	0	0	0	0	0	0	0	0	0	0	0	0	0	0	0	0	0	0	0	0	0	0	0	0
M12Jan2010	2010	Jan	M12	3	Saline	2	1.7	2.74	9.9	13.01	8.71	33.85	7.53	12.99	8.55	34.29	7.53	0	18.4	165.017	M12Jan2010	0	0	0	0	0	0	0	0	0	0	0	0	0	0	0	0	0	0	0	0	0	0	0	0	0	0	0	0
M13Jan2010	2010	Jan	M13	1	Saline	2	1.2	4.15	9.9	12.32	9.72	30.31	7.52	12.32	9.4	30.37	7.52	0	18.5	183.167	M13Jan2010	0	0	0	0	0	0	0	0	0	0	0	0	0	0	0	0	0	0	0	0	0	0	0	0	0	0	0	0
M13Jan2010	2010	Jan	M13	2	Saline	2	1.2	4.15	9.9	12.32	9.72	30.31	7.52	12.32	9.4	30.37	7.52	0	18.5	183.167	M13Jan2010	0	0	0	0	0	0	0	0	0	0	0	0	0	0	0	0	0	0	0	0	0	0	0	0	0	0	0	0
M13Jan2010	2010	Jan	M13	3	Saline	2	1.2	4.15	9.9	12.32	9.72	30.31	7.52	12.32	9.4	30.37	7.52	0	18.5	183.167	M13Jan2010	0	1	0	0	0	0	1	0	0	0	0	0	0	0	0	2	0	0	0	0	0	0	0	0	0	0	0	0
M14Jan2010	2010	Jan	M14	1	Estuarine	2	1.9	3.88	1.1	11.79	10.52	6.1	7.03	11.44	10.3	10.85	7.03	1	12.7	91.1083	M14Jan2010	0	0	0	0	0	0	0	0	0	0	0	0	0	0	0	0	0	0	0	0	0	0	0	0	0	0	0	0
M14Jan2010	2010	Jan	M14	2	Estuarine	2	1.9	3.88	1.1	11.79	10.52	6.1	7.03	11.44	10.3	10.85	7.03	1	12.7	91.1083	M14Jan2010	0	0	0	0	0	0	0	0	0	0	0	0	0	0	0	0	0	0	0	0	0	0	0	0	0	0	0	0
M14Jan2010	2010	Jan	M14	3	Estuarine	2	1.9	3.88	1.1	11.79	10.52	6.1	7.03	11.44	10.3	10.85	7.03	1	12.7	91.1083	M14Jan2010	0	0	0	0	0	0	0	0	0	0	0	0	0	0	0	0	0	0	0	0	0	0	0	0	0	0	0	0
M01Apr2010	2010	Apr	M01	1	Fresh	2	1.5	14	0.5	24.7	7.53	0.5	7.75	24.4	7.01	0.5	7.71	1	26	114	M01Apr2010	0	0	0	0	0	0	0	0	0	0	0	0	0	0	0	0	0	0	0	0	0	0	0	0	0	0	0	0
M01Apr2010	2010	Apr	M01	2	Fresh	2	1.5	14	0.5	24.7	7.53	0.5	7.75	24.4	7.01	0.5	7.71	1	26	114	M01Apr2010	0	0	0	0	0	0	0	0	0	0	0	0	0	0	0	0	0	0	0	0	0	0	0	0	0	0	0	0
M01Apr2010	2010	Apr	M01	3	Fresh	2	1.5	14	0.5	24.7	7.53	0.5	7.75	24.4	7.01	0.5	7.71	1	26	114	M01Apr2010	0	0	0	0	0	0	0	0	0	0	0	0	0	0	0	0	0	0	0	0	0	0	0	0	0	0	0	0
M02Apr2010	2010	Apr	M02	1	Estuarine	2	1.8	6.4	0.9	24.2	7.84	0.6	7.84	24	7.49	0.6	7.79	1	25.5	192.6	M02Apr2010	0	0	0	0	0	0	0	0	0	0	0	0	0	0	0	0	0	0	0	0	0	0	0	0	0	0	0	0
M02Apr2010	2010	Apr	M02	2	Estuarine	2	1.8	6.4	0.9	24.2	7.84	0.6	7.84	24	7.49	0.6	7.79	1	25.5	192.6	M02Apr2010	0	0	0	0	0	0	0	0	0	0	0	0	0	0	0	0	0	0	0	0	0	0	0	0	0	0	0	0
M02Apr2010	2010	Apr	M02	3	Estuarine	2	1.8	6.4	0.9	24.2	7.84	0.6	7.84	24	7.49	0.6	7.79	1	25.5	192.6	M02Apr2010	0	0	0	0	0	0	0	0	0	0	0	0	0	0	0	0	0	0	0	0	0	1	0	0	0	0	0	0
M03Apr2010	2010	Apr	M03	1	Estuarine	2	3	7.7	0.7	23.5	7.51	2.2	7.99	23.5	6.21	2.5	8.83	1	23	274.057	M03Apr2010	0	0	0	0	0	0	0	0	0	0	0	0	0	0	0	0	0	0	0	0	0	0	0	0	0	0	0	0
M03Apr2010	2010	Apr	M03	2	Estuarine	2	3	7.7	0.7	23.5	7.51	2.2	7.99	23.5	6.21	2.5	8.83	1	23	274.057	M03Apr2010	0	0	0	0	0	0	0	0	0	0	0	0	0	0	0	0	0	0	0	0	0	0	0	0	0	0	0	0
M03Apr2010	2010	Apr	M03	3	Estuarine	2	3	7.7	0.7	23.5	7.51	2.2	7.99	23.5	6.21	2.5	8.83	1	23	274.057	M03Apr2010	0	0	0	0	0	0	0	0	0	0	0	0	0	0	0	0	0	0	0	0	0	0	0	0	0	0	0	0
M04Apr2010	2010	Apr	M04	1	Estuarine	2	1.7	9.7	0.7	23.1	7.18	0.3	7.53	23.7	6.44	1.7	7.46	1	23.2	294.824	M04Apr2010	0	0	0	0	0	0	0	0	0	0	0	0	0	0	0	0	0	0	0	0	0	0	0	0	0	0	0	0
M04Apr2010	2010	Apr	M04	2	Estuarine	2	1.7	9.7	0.7	23.1	7.18	0.3	7.53	23.7	6.44	1.7	7.46	1	23.2	294.824	M04Apr2010	0	0	0	0	0	0	0	0	0	0	0	0	0	0	0	0	0	0	0	0	0	0	0	0	0	0	0	0
M04Apr2010	2010	Apr	M04	3	Estuarine	2	1.7	9.7	0.7	23.1	7.18	0.3	7.53	23.7	6.44	1.7	7.46	1	23.2	294.824	M04Apr2010	0	0	0	0	0	0	0	0	0	0	0	0	0	0	0	0	0	0	0	0	0	0	0	0	0	0	0	0
M05Apr2010	2010	Apr	M05	1	Estuarine	2	2.1	12.3	0.7	23.4	6.8	2.6	7.68	22.2	6.24	9	7.69	1	22.7	205.9	M05Apr2010	0	0	0	0	0	0	0	0	0	0	0	0	0	0	0	0	0	0	0	0	0	0	0	0	0	0	0	0
M05Apr2010	2010	Apr	M05	2	Estuarine	2	2.1	12.3	0.7	23.4	6.8	2.6	7.68	22.2	6.24	9	7.69	1	22.7	205.9	M05Apr2010	0	0	0	0	0	0	0	0	0	0	0	0	0	0	0	0	0	0	0	0	0	0	0	0	0	0	0	0
M05Apr2010	2010	Apr	M05	3	Estuarine	2	2.1	12.3	0.7	23.4	6.8	2.6	7.68	22.2	6.24	9	7.69	1	22.7	205.9	M05Apr2010	0	0	0	0	0	0	0	0	0	0	0	0	0	0	0	0	0	0	0	0	0	0	0	0	0	0	0	0
M06Apr2010	2010	Apr	M06	1	Estuarine	2	2.7	7.3	0.9	23.3	7.19	5.6	7.77	23	6.17	20.1	7.94	0	23.2	209.514	M06Apr2010	0	0	0	0	0	0	0	0	0	0	0	0	0	0	0	0	0	0	0	0	0	0	0	0	0	0	0	0
M06Apr2010	2010	Apr	M06	2	Estuarine	2	2.7	7.3	0.9	23.3	7.19	5.6	7.77	23	6.17	20.1	7.94	0	23.2	209.514	M06Apr2010	0	0	0	0	0	0	0	0	0	0	0	0	0	0	0	0	0	0	0	0	0	0	0	0	0	0	0	0
M06Apr2010	2010	Apr	M06	3	Estuarine	2	2.7	7.3	0.9	23.3	7.19	5.6	7.77	23	6.17	20.1	7.94	0	23.2	209.514	M06Apr2010	0	0	0	0	0	0	1	0	0	0	0	0	0	0	0	0	0	0	0	0	0	0	0	0	0	0	0	0
M07Apr2010	2010	Apr	M07	1	Saline	2	1.6	3.8	1.4	24	7.25	14.6	8.04	24	7.22	14.6	8.05	0	23.1	85.2171	M07Apr2010	0	1	0	0	0	0	0	0	0	0	0	0	0	0	0	0	0	0	0	0	0	0	0	0	0	0	0	0
M07Apr2010	2010	Apr	M07	2	Saline	2	1.6	3.8	1.4	24	7.25	14.6	8.04	24	7.22	14.6	8.05	0	23.1	85.2171	M07Apr2010	0	1	0	0	0	0	1	0	0	0	0	0	0	0	0	0	0	0	0	2	0	0	0	0	0	0	0	0
M07Apr2010	2010	Apr	M07	3	Saline	2	1.6	3.8	1.4	24	7.25	14.6	8.04	24	7.22	14.6	8.05	0	23.1	85.2171	M07Apr2010	0	0	0	0	0	0	1	0	0	0	1	0	0	0	0	0	0	0	0	1	0	0	0	0	0	0	0	0
M08Apr2010	2010	Apr	M08	1	Saline	2	1.2	5.1	9.9	23.7	7.12	23.5	8.1	23.7	7.15	23.5	8.11	0	23.2	108.817	M08Apr2010	0	0	0	0	0	0	3	0	0	0	1	0	0	0	0	0	0	0	0	0	0	0	0	0	0	0	0	0
M08Apr2010	2010	Apr	M08	2	Saline	2	1.2	5.1	9.9	23.7	7.12	23.5	8.1	23.7	7.15	23.5	8.11	0	23.2	108.817	M08Apr2010	0	0	0	0	0	0	1	0	0	0	4	0	0	0	0	0	0	0	0	0	0	0	0	0	0	0	0	0
M08Apr2010	2010	Apr	M08	3	Saline	2	1.2	5.1	9.9	23.7	7.12	23.5	8.1	23.7	7.15	23.5	8.11	0	23.2	108.817	M08Apr2010	0	0	0	0	0	0	8	0	0	0	3	0	0	0	0	0	0	0	0	0	0	0	0	0	0	0	0	0
M09Apr2010	2010	Apr	M09	1	Saline	2	1.4	2.5	9.9	23.2	7.18	27.8	8.07	22.4	7.04	31.3	8.1	0	22.3	178.814	M09Apr2010	0	0	0	0	0	0	0	0	0	0	0	0	0	0	0	0	0	0	0	0	0	0	0	0	0	0	0	0
M09Apr2010	2010	Apr	M09	2	Saline	2	1.4	2.5	9.9	23.2	7.18	27.8	8.07	22.4	7.04	31.3	8.1	0	22.3	178.814	M09Apr2010	0	0	0	0	0	0	0	0	0	0	0	0	0	0	0	0	0	0	0	0	0	0	0	0	0	0	0	0
M09Apr2010	2010	Apr	M09	3	Saline	2	1.4	2.5	9.9	23.2	7.18	27.8	8.07	22.4	7.04	31.3	8.1	0	22.3	178.814	M09Apr2010	0	0	0	0	0	0	1	0	0	0	2	0	0	0	0	0	0	0	0	0	0	0	0	0	0	0	0	0
M10Apr2010	2010	Apr	M10	1	Saline	2	1.5	9.1	0	23.3	6.63	29.4	8.14	23.3	6.43	29.4	8.14	0	21.9	80.7917	M10Apr2010	0	0	0	0	0	0	0	0	0	0	0	0	0	0	0	0	0	0	0	0	0	0	0	0	0	0	0	0
M10Apr2010	2010	Apr	M10	2	Saline	2	1.5	9.1	0	23.3	6.63	29.4	8.14	23.3	6.43	29.4	8.14	0	21.9	80.7917	M10Apr2010	0	0	0	0	0	0	3	0	0	0	0	0	0	0	0	0	0	0	0	0	0	0	0	0	0	0	0	0
M10Apr2010	2010	Apr	M10	3	Saline	2	1.5	9.1	0	23.3	6.63	29.4	8.14	23.3	6.43	29.4	8.14	0	21.9	80.7917	M10Apr2010	0	0	0	0	0	0	0	0	0	0	0	0	0	0	0	0	0	0	0	0	0	0	0	0	0	0	0	0
M11Apr2010	2010	Apr	M11	1	Saline	2	1.9	3.8	1.7	23.4	6.45	30.3	8.34	23.4	6.48	30.3	8.32	0	21.6	79.315	M11Apr2010	0	0	0	0	0	0	0	0	0	0	2	0	0	0	0	0	0	0	0	0	0	0	0	0	0	0	0	0
M11Apr2010	2010	Apr	M11	2	Saline	2	1.9	3.8	1.7	23.4	6.45	30.3	8.34	23.4	6.48	30.3	8.32	0	21.6	79.315	M11Apr2010	0	0	0	0	0	0	2	0	0	0	0	0	0	0	0	0	0	0	0	0	0	0	0	0	0	0	0	0
M11Apr2010	2010	Apr	M11	3	Saline	2	1.9	3.8	1.7	23.4	6.45	30.3	8.34	23.4	6.48	30.3	8.32	0	21.6	79.315	M11Apr2010	0	0	0	0	0	0	0	0	0	0	2	0	0	0	0	0	0	0	0	0	0	0	0	0	0	0	0	0
M12Apr2010	2010	Apr	M12	1	Saline	2	1.4	4.1	9.9	22.7	6.9	31.7	8.17	22.7	6.96	31.8	8.18	0	22.6	165.017	M12Apr2010	0	0	0	0	0	0	0	0	0	0	0	0	0	0	0	0	0	0	0	0	0	0	0	0	0	0	0	0
M12Apr2010	2010	Apr	M12	2	Saline	2	1.4	4.1	9.9	22.7	6.9	31.7	8.17	22.7	6.96	31.8	8.18	0	22.6	165.017	M12Apr2010	0	0	0	0	0	0	0	0	0	0	0	0	0	0	0	0	0	0	0	0	0	0	0	0	0	0	0	0
M12Apr2010	2010	Apr	M12	3	Saline	2	1.4	4.1	9.9	22.7	6.9	31.7	8.17	22.7	6.96	31.8	8.18	0	22.6	165.017	M12Apr2010	0	0	0	0	0	0	0	0	0	0	0	0	0	0	0	0	0	0	0	1	0	0	0	0	0	0	0	0
M13Apr2010	2010	Apr	M13	1	Saline	2	1.1	3.6	9.9	22.9	6.85	24	8.28	23.2	6.78	28.7	8.21	0	22.8	183.167	M13Apr2010	0	1	0	0	0	0	0	0	0	0	0	0	0	0	0	0	0	0	0	0	0	0	0	0	0	0	0	0
M13Apr2010	2010	Apr	M13	2	Saline	2	1.1	3.6	9.9	22.9	6.85	24	8.28	23.2	6.78	28.7	8.21	0	22.8	183.167	M13Apr2010	0	1	0	0	0	0	0	0	0	0	0	0	0	0	0	0	0	0	0	0	0	0	0	0	0	0	0	0
M13Apr2010	2010	Apr	M13	3	Saline	2	1.1	3.6	9.9	22.9	6.85	24	8.28	23.2	6.78	28.7	8.21	0	22.8	183.167	M13Apr2010	0	0	0	0	0	0	0	0	0	0	0	0	0	0	0	0	0	0	0	0	0	0	0	0	0	0	0	0
M14Apr2010	2010	Apr	M14	1	Estuarine	2	1.7	10.2	0.6	22.9	7.03	0.3	7.44	22.9	6.89	0.3	7.47	1	21.5	91.1083	M14Apr2010	0	0	0	0	0	0	0	0	0	0	0	0	0	0	0	0	0	0	0	0	0	0	0	0	0	0	0	0
M14Apr2010	2010	Apr	M14	2	Estuarine	2	1.7	10.2	0.6	22.9	7.03	0.3	7.44	22.9	6.89	0.3	7.47	1	21.5	91.1083	M14Apr2010	0	0	0	0	0	0	0	0	0	0	0	0	0	0	0	0	0	0	0	0	0	0	0	0	0	0	0	0
M14Apr2010	2010	Apr	M14	3	Estuarine	2	1.7	10.2	0.6	22.9	7.03	0.3	7.44	22.9	6.89	0.3	7.47	1	21.5	91.1083	M14Apr2010	0	0	0	0	0	0	0	0	0	0	0	0	0	0	0	0	0	0	0	0	0	0	0	0	0	0	0	0
M01Jul2010	2010	Jul	M01	1	Fresh	3	1.7	4.2	1	29.5	6.37	0.6	8.02	29.4	5.88	0.6	7.95	1	28.4	114	M01Jul2010	0	0	0	0	0	0	0	0	0	0	0	0	0	0	0	0	0	0	0	0	0	0	0	0	0	0	0	0
M01Jul2010	2010	Jul	M01	2	Fresh	3	1.7	4.2	1	29.5	6.37	0.6	8.02	29.4	5.88	0.6	7.95	1	28.4	114	M01Jul2010	0	0	0	0	0	0	0	0	0	0	0	0	0	0	0	0	0	0	0	0	0	0	0	0	0	0	0	0
M01Jul2010	2010	Jul	M01	3	Fresh	3	1.7	4.2	1	29.5	6.37	0.6	8.02	29.4	5.88	0.6	7.95	1	28.4	114	M01Jul2010	0	0	0	0	0	0	0	0	0	0	0	0	0	0	0	0	0	0	0	0	0	0	0	0	0	0	0	0
M02Jul2010	2010	Jul	M02	1	Estuarine	3	2.1	5.3	1	30.2	6.62	0.7	8.27	30.2	6.6	0.7	8.22	1	26.5	192.6	M02Jul2010	0	0	0	0	0	0	0	0	0	0	0	0	0	0	0	0	0	0	0	0	0	0	0	0	0	0	0	0
M02Jul2010	2010	Jul	M02	2	Estuarine	3	2.1	5.3	1	30.2	6.62	0.7	8.27	30.2	6.6	0.7	8.22	1	26.5	192.6	M02Jul2010	0	0	0	0	0	0	0	0	0	0	0	0	0	0	0	0	0	0	0	0	0	0	0	0	0	0	0	0
M02Jul2010	2010	Jul	M02	3	Estuarine	3	2.1	5.3	1	30.2	6.62	0.7	8.27	30.2	6.6	0.7	8.22	1	26.5	192.6	M02Jul2010	0	0	0	0	0	0	0	0	0	0	0	0	0	0	0	0	0	0	0	0	0	0	0	0	0	0	0	0
M03Jul2010	2010	Jul	M03	1	Estuarine	3	3	2.7	1.2	29.3	6.59	4.4	8.28	30	4.19	8.4	7.96	1	29.8	274.057	M03Jul2010	0	0	0	0	0	0	0	0	0	0	0	0	0	0	0	0	0	0	0	0	0	0	0	0	0	0	0	0
M03Jul2010	2010	Jul	M03	2	Estuarine	3	3	2.7	1.2	29.3	6.59	4.4	8.28	30	4.19	8.4	7.96	1	29.8	274.057	M03Jul2010	0	0	0	0	0	0	0	0	0	0	0	0	0	0	0	0	0	0	0	0	0	0	0	0	0	0	0	0
M03Jul2010	2010	Jul	M03	3	Estuarine	3	3	2.7	1.2	29.3	6.59	4.4	8.28	30	4.19	8.4	7.96	1	29.8	274.057	M03Jul2010	0	0	0	0	0	0	0	0	0	0	0	0	0	0	0	0	0	0	0	0	0	0	0	0	0	0	0	0
M05Jul2010	2010	Jul	M05	1	Estuarine	3	2.2	5.2	1.1	28.8	6.79	10.4	8.24	28.8	6.58	10.9	8.2	1	29.1	205.9	M05Jul2010	0	0	0	0	0	0	0	0	0	0	0	0	0	0	0	0	0	0	0	0	0	0	0	0	0	0	0	0
M05Jul2010	2010	Jul	M05	2	Estuarine	3	2.2	5.2	1.1	28.8	6.79	10.4	8.24	28.8	6.58	10.9	8.2	1	29.1	205.9	M05Jul2010	0	0	0	0	0	0	0	0	0	0	0	0	0	0	0	0	0	0	0	0	0	0	0	0	0	0	0	0
M05Jul2010	2010	Jul	M05	3	Estuarine	3	2.2	5.2	1.1	28.8	6.79	10.4	8.24	28.8	6.58	10.9	8.2	1	29.1	205.9	M05Jul2010	0	0	0	0	0	0	0	0	0	0	0	0	0	0	0	0	0	0	0	0	0	0	0	0	0	0	0	0
M06Jul2010	2010	Jul	M06	1	Estuarine	3	2.7	4.5	1.3	28.5	6.11	19	8.25	28.6	5.63	24.9	8.26	0	28.7	209.514	M06Jul2010	0	0	0	0	0	0	0	0	0	0	0	0	0	0	0	0	0	0	0	0	0	0	0	0	0	0	0	0
M06Jul2010	2010	Jul	M06	2	Estuarine	3	2.7	4.5	1.3	28.5	6.11	19	8.25	28.6	5.63	24.9	8.26	0	28.7	209.514	M06Jul2010	0	0	0	0	0	0	0	0	0	0	0	0	0	0	0	0	0	0	0	0	0	0	0	0	0	0	0	0
M06Jul2010	2010	Jul	M06	3	Estuarine	3	2.7	4.5	1.3	28.5	6.11	19	8.25	28.6	5.63	24.9	8.26	0	28.7	209.514	M06Jul2010	0	0	0	0	0	0	0	0	0	0	0	0	0	0	0	0	0	0	0	0	0	0	0	0	0	0	0	0
M07Jul2010	2010	Jul	M07	1	Saline	3	2	5.4	1.3	29.2	6.82	20.7	8.3	29.1	6.63	21.5	8.3	0	29.2	85.2171	M07Jul2010	0	0	0	0	0	0	1	0	0	0	1	0	0	0	0	0	0	0	0	0	0	0	0	0	0	0	0	0
M07Jul2010	2010	Jul	M07	2	Saline	3	2	5.4	1.3	29.2	6.82	20.7	8.3	29.1	6.63	21.5	8.3	0	29.2	85.2171	M07Jul2010	0	0	0	0	0	0	3	0	0	0	2	0	0	0	0	1	0	0	0	0	0	0	0	0	0	0	0	0
M07Jul2010	2010	Jul	M07	3	Saline	3	2	5.4	1.3	29.2	6.82	20.7	8.3	29.1	6.63	21.5	8.3	0	29.2	85.2171	M07Jul2010	0	0	0	0	0	0	2	0	0	0	0	0	0	0	0	0	0	0	0	0	0	0	0	0	0	0	0	0
M08Jul2010	2010	Jul	M08	1	Saline	3	0.9	9.1	9.9	30.5	6.44	30.7	8.23	30.5	6.07	30.8	8.22	0	29.3	108.817	M08Jul2010	0	0	0	0	0	0	3	0	0	0	3	0	0	0	0	0	0	0	0	0	0	0	0	0	0	0	0	0
M08Jul2010	2010	Jul	M08	2	Saline	3	0.9	9.1	9.9	30.5	6.44	30.7	8.23	30.5	6.07	30.8	8.22	0	29.3	108.817	M08Jul2010	0	0	0	0	0	0	5	0	0	0	0	0	0	0	0	0	0	0	0	0	0	0	0	0	0	0	0	0
M08Jul2010	2010	Jul	M08	3	Saline	3	0.9	9.1	9.9	30.5	6.44	30.7	8.23	30.5	6.07	30.8	8.22	0	29.3	108.817	M08Jul2010	1	0	0	0	0	0	9	0	0	0	2	0	0	0	0	0	0	0	0	0	0	0	0	0	0	0	0	0
M09Jul2010	2010	Jul	M09	1	Saline	3	1.3	2.2	9.9	28.8	7.26	28.9	8.4	28.8	7.12	28.9	8.4	0	28.9	178.814	M09Jul2010	0	0	0	0	0	0	0	0	0	0	1	0	0	0	0	0	0	0	0	0	0	0	0	0	1	0	0	0
M09Jul2010	2010	Jul	M09	2	Saline	3	1.3	2.2	9.9	28.8	7.26	28.9	8.4	28.8	7.12	28.9	8.4	0	28.9	178.814	M09Jul2010	0	0	0	0	0	0	1	0	0	0	1	0	0	0	0	0	0	0	0	0	0	0	0	0	0	0	0	0
M09Jul2010	2010	Jul	M09	3	Saline	3	1.3	2.2	9.9	28.8	7.26	28.9	8.4	28.8	7.12	28.9	8.4	0	28.9	178.814	M09Jul2010	0	0	0	0	0	0	1	0	0	0	0	0	0	0	0	0	0	0	0	0	0	0	0	0	0	0	0	0
M10Jul2010	2010	Jul	M10	1	Saline	3	1.2	1	9.9	29.4	5.81	27.9	8.42	29.4	6.04	27.9	8.45	0	28.4	80.7917	M10Jul2010	0	0	0	0	0	0	0	0	0	0	0	0	0	0	0	0	0	0	0	0	0	0	0	0	0	0	0	0
M10Jul2010	2010	Jul	M10	2	Saline	3	1.2	1	9.9	29.4	5.81	27.9	8.42	29.4	6.04	27.9	8.45	0	28.4	80.7917	M10Jul2010	0	0	0	0	0	0	0	0	0	0	0	0	0	0	0	0	0	0	0	0	0	0	0	0	0	0	0	0
M10Jul2010	2010	Jul	M10	3	Saline	3	1.2	1	9.9	29.4	5.81	27.9	8.42	29.4	6.04	27.9	8.45	0	28.4	80.7917	M10Jul2010	0	0	0	0	0	0	0	0	0	0	0	0	0	0	0	0	0	0	0	0	0	0	0	0	0	0	0	0
M11Jul2010	2010	Jul	M11	1	Saline	3	1.8	2.1	9.9	29.5	6.72	28	8.61	29.5	6.61	28	8.61	0	28.3	79.315	M11Jul2010	0	0	0	0	0	0	2	0	0	0	0	0	0	0	0	0	0	0	0	1	0	0	0	0	0	0	0	0
M11Jul2010	2010	Jul	M11	2	Saline	3	1.8	2.1	9.9	29.5	6.72	28	8.61	29.5	6.61	28	8.61	0	28.3	79.315	M11Jul2010	0	0	0	0	0	0	1	0	0	0	0	0	0	0	0	0	0	0	0	0	0	0	0	0	0	0	0	0
M11Jul2010	2010	Jul	M11	3	Saline	3	1.8	2.1	9.9	29.5	6.72	28	8.61	29.5	6.61	28	8.61	0	28.3	79.315	M11Jul2010	0	0	0	0	0	0	0	0	0	0	0	0	0	0	0	0	0	0	0	0	0	0	0	0	0	0	0	0
M12Jul2010	2010	Jul	M12	1	Saline	3	1.3	2.6	9.9	29.7	7.79	28.1	8.44	29.7	7.68	28.1	8.44	0	28.4	165.017	M12Jul2010	0	0	0	0	0	0	0	0	0	0	0	0	0	0	0	0	0	0	0	0	0	0	0	1	0	0	0	0
M12Jul2010	2010	Jul	M12	2	Saline	3	1.3	2.6	9.9	29.7	7.79	28.1	8.44	29.7	7.68	28.1	8.44	0	28.4	165.017	M12Jul2010	0	0	0	0	0	0	0	0	0	0	0	0	0	0	0	0	0	0	0	0	0	0	0	0	0	0	0	0
M12Jul2010	2010	Jul	M12	3	Saline	3	1.3	2.6	9.9	29.7	7.79	28.1	8.44	29.7	7.68	28.1	8.44	0	28.4	165.017	M12Jul2010	0	0	0	0	0	0	0	0	0	0	0	0	0	0	0	0	0	0	0	0	0	0	0	0	0	0	0	0
M13Jul2010	2010	Jul	M13	1	Saline	3	1	1.8	9.9	30.3	7.91	29.7	8.59	30.3	8.27	29.7	8.59	0	30.7	183.167	M13Jul2010	0	0	0	0	0	0	0	0	0	0	0	0	0	0	0	0	0	0	0	0	0	0	0	0	0	0	0	0
M13Jul2010	2010	Jul	M13	2	Saline	3	1	1.8	9.9	30.3	7.91	29.7	8.59	30.3	8.27	29.7	8.59	0	30.7	183.167	M13Jul2010	0	0	0	0	0	0	0	0	0	0	0	0	0	0	0	0	0	0	0	0	0	0	0	0	0	0	0	0
M13Jul2010	2010	Jul	M13	3	Saline	3	1	1.8	9.9	30.3	7.91	29.7	8.59	30.3	8.27	29.7	8.59	0	30.7	183.167	M13Jul2010	0	0	0	0	0	0	0	0	0	0	0	0	0	0	0	0	0	0	0	0	0	0	0	0	0	0	0	0
M14Jul2010	2010	Jul	M14	1	Estuarine	3	2.3	11.2	0.8	29.1	6.82	0.2	8.15	29	6.6	0.2	8.06	0	28.8	91.1083	M14Jul2010	0	0	0	0	0	0	0	0	0	0	0	0	0	0	0	0	0	0	0	0	0	0	0	0	0	0	0	0
M14Jul2010	2010	Jul	M14	2	Estuarine	3	2.3	11.2	0.8	29.1	6.82	0.2	8.15	29	6.6	0.2	8.06	0	28.8	91.1083	M14Jul2010	0	0	0	0	0	0	0	0	0	0	0	0	0	0	0	0	0	0	0	0	0	0	0	0	0	0	0	0
M14Jul2010	2010	Jul	M14	3	Estuarine	3	2.3	11.2	0.8	29.1	6.82	0.2	8.15	29	6.6	0.2	8.06	0	28.8	91.1083	M14Jul2010	0	0	0	0	0	0	0	0	0	0	0	0	0	0	0	0	0	0	0	0	0	0	0	0	0	0	0	0
M01Oct2010	2010	Oct	M01	1	Fresh	3	2.3	8.62	1	26.1	6.08	1.2	8.04	26	5.8	1.4	8	0	28	114	M01Oct2010	0	0	0	0	0	0	0	0	0	0	0	0	0	0	0	0	0	0	0	0	0	0	0	0	0	0	0	0
M01Oct2010	2010	Oct	M01	2	Fresh	3	2.3	8.62	1	26.1	6.08	1.2	8.04	26	5.8	1.4	8	0	28	114	M01Oct2010	0	0	0	0	0	0	0	0	0	0	0	0	0	0	0	0	0	0	0	0	0	0	0	0	0	0	0	0
M01Oct2010	2010	Oct	M01	3	Fresh	3	2.3	8.62	1	26.1	6.08	1.2	8.04	26	5.8	1.4	8	0	28	114	M01Oct2010	0	0	0	0	0	0	0	0	0	0	0	0	0	0	0	0	0	0	0	0	0	0	0	0	0	0	0	0
M02Oct2010	2010	Oct	M02	1	Estuarine	3	2	3.08	1.1	26	5.72	8.3	7.99	26	5.52	8.7	8.03	1	27.3	192.6	M02Oct2010	0	0	0	0	0	0	0	0	0	0	0	0	0	0	0	0	0	0	0	0	0	0	0	0	0	0	0	0
M02Oct2010	2010	Oct	M02	2	Estuarine	3	2	3.08	1.1	26	5.72	8.3	7.99	26	5.52	8.7	8.03	1	27.3	192.6	M02Oct2010	0	0	0	0	0	0	0	0	0	0	0	0	0	0	0	0	0	0	0	0	0	0	0	0	0	0	0	0
M02Oct2010	2010	Oct	M02	3	Estuarine	3	2	3.08	1.1	26	5.72	8.3	7.99	26	5.52	8.7	8.03	1	27.3	192.6	M02Oct2010	0	0	0	0	0	0	0	0	0	0	0	0	0	0	0	0	0	0	0	0	0	0	0	0	0	0	0	0
M04Oct2010	2010	Oct	M04	1	Estuarine	3	2.1	5.13	1	26.1	6.83	4.6	8.06	27.6	5.55	10.4	7.96	1	23.5	294.824	M04Oct2010	0	0	0	0	0	0	0	0	0	0	0	0	0	0	0	0	0	0	0	0	0	0	0	0	0	0	0	0
M04Oct2010	2010	Oct	M04	2	Estuarine	3	2.1	5.13	1	26.1	6.83	4.6	8.06	27.6	5.55	10.4	7.96	1	23.5	294.824	M04Oct2010	0	0	0	0	0	0	0	0	0	0	0	0	0	0	0	0	0	0	0	0	0	0	0	0	0	0	0	0
M04Oct2010	2010	Oct	M04	3	Estuarine	3	2.1	5.13	1	26.1	6.83	4.6	8.06	27.6	5.55	10.4	7.96	1	23.5	294.824	M04Oct2010	0	0	0	0	0	0	0	0	0	0	0	0	0	0	0	0	0	0	0	0	0	0	0	0	0	0	0	0
M06Oct2010	2010	Oct	M06	1	Estuarine	3	2.9	2.93	1.8	26.3	7.53	16.2	8.2	27.4	5.36	27.6	8.27	0	26.4	209.514	M06Oct2010	0	0	0	0	0	0	0	0	0	0	0	0	0	0	0	0	0	0	0	0	0	0	0	0	0	0	0	0
M06Oct2010	2010	Oct	M06	2	Estuarine	3	2.9	2.93	1.8	26.3	7.53	16.2	8.2	27.4	5.36	27.6	8.27	0	26.4	209.514	M06Oct2010	0	0	0	0	0	0	0	0	0	0	1	0	0	0	0	0	0	0	0	0	0	0	0	0	0	0	0	0
M06Oct2010	2010	Oct	M06	3	Estuarine	3	2.9	2.93	1.8	26.3	7.53	16.2	8.2	27.4	5.36	27.6	8.27	0	26.4	209.514	M06Oct2010	0	0	0	0	0	0	0	0	0	0	1	0	0	0	0	1	0	0	0	0	0	0	0	0	0	0	0	0
M07Oct2010	2010	Oct	M07	1	Saline	3	2.2	5.71	1.5	26.9	7.53	24.7	8.36	26.9	7.18	25.1	8.39	0	26.5	85.2171	M07Oct2010	0	0	0	0	0	0	0	0	0	0	0	0	0	0	0	0	0	0	0	0	0	0	0	0	0	0	0	0
M07Oct2010	2010	Oct	M07	2	Saline	3	2.2	5.71	1.5	26.9	7.53	24.7	8.36	26.9	7.18	25.1	8.39	0	26.5	85.2171	M07Oct2010	0	0	0	0	0	0	0	0	0	0	0	0	0	0	0	0	0	0	0	1	0	0	0	0	0	0	0	0
M07Oct2010	2010	Oct	M07	3	Saline	3	2.2	5.71	1.5	26.9	7.53	24.7	8.36	26.9	7.18	25.1	8.39	0	26.5	85.2171	M07Oct2010	1	0	0	0	0	0	0	0	0	0	0	0	0	0	0	0	0	0	0	1	0	0	0	0	0	0	0	0
M08Oct2010	2010	Oct	M08	1	Saline	3	1	9.53	0.9	27.1	7.84	26.7	8.32	27.1	7.24	26.7	8.36	0	26.5	108.817	M08Oct2010	0	0	0	0	0	0	2	0	0	0	3	0	0	0	0	0	0	0	0	1	0	0	0	0	0	0	0	0
M08Oct2010	2010	Oct	M08	2	Saline	3	1	9.53	0.9	27.1	7.84	26.7	8.32	27.1	7.24	26.7	8.36	0	26.5	108.817	M08Oct2010	0	0	0	0	0	0	0	0	0	0	0	0	0	0	0	0	0	0	0	1	0	0	0	0	0	0	0	0
M08Oct2010	2010	Oct	M08	3	Saline	3	1	9.53	0.9	27.1	7.84	26.7	8.32	27.1	7.24	26.7	8.36	0	26.5	108.817	M08Oct2010	0	0	0	0	0	0	2	0	0	0	3	0	0	0	0	0	0	0	0	0	0	0	0	0	0	0	0	0
M09Oct2010	2010	Oct	M09	1	Saline	3	1.6	10.4	0.9	26.4	7	29.4	8.42	26.4	7	29.4	8.42	0	27.2	178.814	M09Oct2010	0	0	0	0	0	0	0	0	0	0	4	0	0	0	0	0	0	0	0	1	0	0	0	0	0	0	0	0
M09Oct2010	2010	Oct	M09	2	Saline	3	1.6	10.4	0.9	26.4	7	29.4	8.42	26.4	7	29.4	8.42	0	27.2	178.814	M09Oct2010	0	0	0	0	0	0	0	0	0	0	2	0	0	0	0	0	0	0	0	0	0	0	0	0	0	0	0	0
M09Oct2010	2010	Oct	M09	3	Saline	3	1.6	10.4	0.9	26.4	7	29.4	8.42	26.4	7	29.4	8.42	0	27.2	178.814	M09Oct2010	0	0	0	0	0	0	0	0	0	0	1	0	0	0	0	0	0	0	0	0	0	0	0	0	0	0	0	0
M10Oct2010	2010	Oct	M10	1	Saline	3	2	13.1	0.8	24.1	6.21	31.5	8.31	24.2	6.13	31.6	8.3	0	25.3	80.7917	M10Oct2010	0	0	0	0	0	0	0	0	0	0	0	0	0	0	0	0	0	0	0	0	0	0	0	0	0	0	0	0
M10Oct2010	2010	Oct	M10	2	Saline	3	2	13.1	0.8	24.1	6.21	31.5	8.31	24.2	6.13	31.6	8.3	0	25.3	80.7917	M10Oct2010	0	0	0	0	0	0	0	0	0	0	1	0	0	0	0	0	0	0	0	0	0	0	0	0	0	0	0	0
M10Oct2010	2010	Oct	M10	3	Saline	3	2	13.1	0.8	24.1	6.21	31.5	8.31	24.2	6.13	31.6	8.3	0	25.3	80.7917	M10Oct2010	0	0	0	0	0	0	0	0	0	0	0	0	0	0	0	0	0	0	0	0	0	0	0	0	0	0	1	0
M11Oct2010	2010	Oct	M11	1	Saline	3	2.6	5.48	1.4	24.7	6.89	32.3	8.34	24.7	6.53	32.3	8.35	0	25.6	79.315	M11Oct2010	0	0	0	0	0	0	0	0	0	0	1	0	0	0	0	0	0	0	0	0	0	0	0	0	0	0	0	0
M11Oct2010	2010	Oct	M11	2	Saline	3	2.6	5.48	1.4	24.7	6.89	32.3	8.34	24.7	6.53	32.3	8.35	0	25.6	79.315	M11Oct2010	0	0	0	0	0	0	0	0	0	0	0	0	0	0	0	0	0	0	0	0	0	0	0	0	0	0	0	0
M11Oct2010	2010	Oct	M11	3	Saline	3	2.6	5.48	1.4	24.7	6.89	32.3	8.34	24.7	6.53	32.3	8.35	0	25.6	79.315	M11Oct2010	0	0	0	0	0	0	0	0	0	0	0	0	0	0	0	0	0	0	0	0	0	0	0	0	0	0	0	0
M12Oct2010	2010	Oct	M12	1	Saline	3	2.2	13.2	1.3	26.1	6.79	33.2	8.38	26.1	6.74	33.2	8.41	0	25.6	165.017	M12Oct2010	0	0	0	0	0	0	1	0	0	0	0	0	0	0	0	0	0	0	0	0	0	0	0	0	0	0	0	0
M12Oct2010	2010	Oct	M12	2	Saline	3	2.2	13.2	1.3	26.1	6.79	33.2	8.38	26.1	6.74	33.2	8.41	0	25.6	165.017	M12Oct2010	0	0	0	0	0	0	0	0	0	0	0	0	0	0	0	0	0	0	0	0	0	0	0	0	0	0	0	0
M12Oct2010	2010	Oct	M12	3	Saline	3	2.2	13.2	1.3	26.1	6.79	33.2	8.38	26.1	6.74	33.2	8.41	0	25.6	165.017	M12Oct2010	0	0	0	0	0	0	1	0	0	0	0	0	0	0	0	0	0	0	0	0	0	0	0	0	0	0	0	0
M13Oct2010	2010	Oct	M13	1	Saline	3	1.9	10.2	0.8	24.7	6.58	29.1	8.27	24.7	6.52	29.3	8.28	0	25.5	183.167	M13Oct2010	0	0	0	0	0	0	0	0	0	0	0	0	0	0	0	0	0	0	0	5	0	0	0	0	0	0	0	0
M13Oct2010	2010	Oct	M13	2	Saline	3	1.9	10.2	0.8	24.7	6.58	29.1	8.27	24.7	6.52	29.3	8.28	0	25.5	183.167	M13Oct2010	0	0	0	0	0	0	0	0	0	0	0	0	0	0	0	0	0	0	0	0	0	0	0	0	0	0	0	0
M13Oct2010	2010	Oct	M13	3	Saline	3	1.9	10.2	0.8	24.7	6.58	29.1	8.27	24.7	6.52	29.3	8.28	0	25.5	183.167	M13Oct2010	0	0	0	0	0	0	0	0	0	0	0	0	0	0	0	1	0	0	0	0	0	0	0	0	0	0	0	0
M14Oct2010	2010	Oct	M14	1	Estuarine	3	2	5.08	0.9	26.2	6.13	1.2	7.76	26.5	4.84	1.9	7.79	0	23	91.1083	M14Oct2010	0	0	0	0	0	0	0	0	0	0	0	0	0	0	0	0	0	0	0	0	0	0	0	0	0	0	0	0
M14Oct2010	2010	Oct	M14	2	Estuarine	3	2	5.08	0.9	26.2	6.13	1.2	7.76	26.5	4.84	1.9	7.79	0	23	91.1083	M14Oct2010	0	0	0	0	0	0	0	0	0	0	0	0	0	0	0	0	0	0	0	0	0	0	0	0	0	0	0	0
M14Oct2010	2010	Oct	M14	3	Estuarine	3	2	5.08	0.9	26.2	6.13	1.2	7.76	26.5	4.84	1.9	7.79	0	23	91.1083	M14Oct2010	0	0	0	0	0	0	0	0	0	0	0	0	0	0	0	0	0	0	0	0	0	0	0	0	0	0	0	0
M01Jan2011	2011	Jan	M01	1	Fresh	3	1.8	3.8	1.1	18.7	8.15	10.1	8.59	17.8	7.29	11	8.53	1	24.1	114	M01Jan2011	0	0	0	0	0	0	0	0	0	0	0	0	0	0	0	0	0	0	0	0	0	0	0	0	0	0	0	0
M01Jan2011	2011	Jan	M01	2	Fresh	3	1.8	3.8	1.1	18.7	8.15	10.1	8.59	17.8	7.29	11	8.53	1	24.1	114	M01Jan2011	0	0	0	0	0	0	0	0	0	0	0	0	0	0	0	0	0	0	0	0	0	0	0	0	0	0	0	0
M01Jan2011	2011	Jan	M01	3	Fresh	3	1.8	3.8	1.1	18.7	8.15	10.1	8.59	17.8	7.29	11	8.53	1	24.1	114	M01Jan2011	0	0	0	0	0	0	0	0	0	0	0	0	0	0	0	0	0	0	0	0	0	0	0	0	0	0	0	0
M02Jan2011	2011	Jan	M02	1	Estuarine	3	2.1	2.5	1.5	18.4	7.52	20.9	8.37	17.9	7.3	22.4	8.43	1	24.2	192.6	M02Jan2011	0	0	0	0	0	0	0	0	0	0	0	0	0	0	0	0	0	0	0	0	0	0	0	0	0	0	0	0
M02Jan2011	2011	Jan	M02	2	Estuarine	3	2.1	2.5	1.5	18.4	7.52	20.9	8.37	17.9	7.3	22.4	8.43	1	24.2	192.6	M02Jan2011	0	0	0	0	0	0	0	0	0	0	0	0	0	0	0	0	0	0	0	0	0	0	0	0	0	0	0	0
M02Jan2011	2011	Jan	M02	3	Estuarine	3	2.1	2.5	1.5	18.4	7.52	20.9	8.37	17.9	7.3	22.4	8.43	1	24.2	192.6	M02Jan2011	0	0	0	0	0	0	0	0	0	0	0	0	0	0	0	0	0	0	0	0	0	0	0	0	0	0	0	0
M03Jan2011	2011	Jan	M03	1	Estuarine	3	3	2	2	17.8	9.66	23.4	8.33	17.7	8.39	25.1	8.26	1	21	274.057	M03Jan2011	0	0	0	0	0	0	0	0	0	0	0	0	0	0	0	0	0	0	0	0	0	0	0	0	0	0	0	0
M03Jan2011	2011	Jan	M03	2	Estuarine	3	3	2	2	17.8	9.66	23.4	8.33	17.7	8.39	25.1	8.26	1	21	274.057	M03Jan2011	0	0	0	0	0	0	0	0	0	0	0	0	0	0	0	0	0	0	0	0	0	0	0	0	0	0	0	0
M03Jan2011	2011	Jan	M03	3	Estuarine	3	3	2	2	17.8	9.66	23.4	8.33	17.7	8.39	25.1	8.26	1	21	274.057	M03Jan2011	0	0	0	0	0	0	0	0	0	0	0	0	0	0	0	0	0	0	0	0	0	0	0	0	0	0	0	0
M04Jan2011	2011	Jan	M04	1	Estuarine	3	1.8	3.1	1.6	18.3	8.83	23	8.31	17.9	7.79	24.6	8.23	1	22.3	294.824	M04Jan2011	0	0	0	0	0	0	0	0	0	0	0	0	0	0	0	0	0	0	0	0	0	0	0	0	0	0	0	0
M04Jan2011	2011	Jan	M04	2	Estuarine	3	1.8	3.1	1.6	18.3	8.83	23	8.31	17.9	7.79	24.6	8.23	1	22.3	294.824	M04Jan2011	0	0	0	0	0	0	0	0	0	0	0	0	0	0	0	0	0	0	0	0	0	0	0	0	0	0	0	0
M04Jan2011	2011	Jan	M04	3	Estuarine	3	1.8	3.1	1.6	18.3	8.83	23	8.31	17.9	7.79	24.6	8.23	1	22.3	294.824	M04Jan2011	0	0	0	0	0	0	0	0	0	0	0	0	0	0	0	0	0	0	0	0	0	0	0	0	0	0	0	0
M05Jan2011	2011	Jan	M05	1	Estuarine	3	2.4	1.5	1.5	17.9	9.34	26.1	8.24	18.5	8.08	28.2	8.13	1	18.8	205.9	M05Jan2011	0	0	0	0	0	0	0	0	0	0	0	0	0	0	0	0	0	0	0	0	0	0	0	0	0	0	0	0
M05Jan2011	2011	Jan	M05	2	Estuarine	3	2.4	1.5	1.5	17.9	9.34	26.1	8.24	18.5	8.08	28.2	8.13	1	18.8	205.9	M05Jan2011	0	0	0	0	0	0	0	0	0	0	0	0	0	0	0	0	0	0	0	0	0	0	0	0	0	0	0	0
M05Jan2011	2011	Jan	M05	3	Estuarine	3	2.4	1.5	1.5	17.9	9.34	26.1	8.24	18.5	8.08	28.2	8.13	1	18.8	205.9	M05Jan2011	0	0	0	0	0	0	0	0	0	0	0	0	0	0	0	0	0	0	0	0	0	0	0	0	0	0	0	0
M06Jan2011	2011	Jan	M06	1	Estuarine	3	2.9	4.2	1.5	19.1	8.3	29.4	8.07	19.6	7.62	30.6	8.1	0	21	209.514	M06Jan2011	0	0	0	0	0	0	0	0	0	0	0	0	0	0	0	0	0	0	0	0	0	0	0	0	0	0	0	0
M06Jan2011	2011	Jan	M06	2	Estuarine	3	2.9	4.2	1.5	19.1	8.3	29.4	8.07	19.6	7.62	30.6	8.1	0	21	209.514	M06Jan2011	0	0	0	0	0	0	0	0	0	0	0	0	0	0	0	0	0	0	0	0	0	0	0	0	0	0	0	0
M06Jan2011	2011	Jan	M06	3	Estuarine	3	2.9	4.2	1.5	19.1	8.3	29.4	8.07	19.6	7.62	30.6	8.1	0	21	209.514	M06Jan2011	0	0	0	0	0	0	0	0	0	0	0	0	0	0	0	0	0	0	0	0	0	0	0	0	0	0	0	0
M07Jan2011	2011	Jan	M07	1	Saline	3	2.1	3.7	2.1	21.1	7.91	32.9	8.55	21.2	7.86	33.1	8.53	0	22.1	85.2171	M07Jan2011	0	2	0	0	0	0	0	0	0	0	0	0	0	0	0	0	0	0	0	0	0	0	0	0	0	0	0	0
M07Jan2011	2011	Jan	M07	2	Saline	3	2.1	3.7	2.1	21.1	7.91	32.9	8.55	21.2	7.86	33.1	8.53	0	22.1	85.2171	M07Jan2011	0	4	0	0	0	0	3	0	0	0	0	0	0	0	0	0	0	0	0	0	0	0	0	0	0	0	0	0
M07Jan2011	2011	Jan	M07	3	Saline	3	2.1	3.7	2.1	21.1	7.91	32.9	8.55	21.2	7.86	33.1	8.53	0	22.1	85.2171	M07Jan2011	0	5	0	0	0	0	0	0	0	0	0	0	0	0	0	0	0	0	0	0	0	0	0	0	0	0	0	0
M08Jan2011	2011	Jan	M08	1	Saline	3	1	3	1	20.8	8.46	32.2	8.52	20.8	8.21	32.2	8.49	0	21.4	108.817	M08Jan2011	0	1	0	0	0	0	0	0	0	0	0	0	0	0	0	0	0	0	0	2	0	0	0	0	0	0	0	0
M08Jan2011	2011	Jan	M08	2	Saline	3	1	3	1	20.8	8.46	32.2	8.52	20.8	8.21	32.2	8.49	0	21.4	108.817	M08Jan2011	0	4	0	0	0	0	9	0	0	0	3	0	0	0	0	0	0	0	0	1	0	0	0	0	0	0	0	0
M08Jan2011	2011	Jan	M08	3	Saline	3	1	3	1	20.8	8.46	32.2	8.52	20.8	8.21	32.2	8.49	0	21.4	108.817	M08Jan2011	0	3	0	0	0	0	0	0	0	0	2	0	0	0	0	0	0	0	0	0	0	0	0	0	0	0	1	0
M09Jan2011	2011	Jan	M09	1	Saline	3	1.5	4	1.5	21.3	8.04	33.9	8.59	21.3	7.31	33.8	8.56	0	22.2	178.814	M09Jan2011	1	0	0	0	0	0	0	0	0	0	0	0	0	0	0	0	0	0	0	0	0	0	0	0	0	0	0	0
M09Jan2011	2011	Jan	M09	2	Saline	3	1.5	4	1.5	21.3	8.04	33.9	8.59	21.3	7.31	33.8	8.56	0	22.2	178.814	M09Jan2011	5	0	0	0	0	0	8	0	0	0	0	0	0	0	0	0	1	0	0	0	0	0	0	0	0	0	0	0
M09Jan2011	2011	Jan	M09	3	Saline	3	1.5	4	1.5	21.3	8.04	33.9	8.59	21.3	7.31	33.8	8.56	0	22.2	178.814	M09Jan2011	2	0	0	0	0	0	6	0	0	0	0	0	0	0	0	0	1	0	0	0	0	0	0	0	0	0	0	0
M10Jan2011	2011	Jan	M10	1	Saline	3	1.3	3.6	1.3	18.1	8.17	34.3	8.17	18.1	7.68	34.3	8.12	0	18	80.7917	M10Jan2011	0	0	0	0	0	0	7	0	0	0	0	0	0	0	0	0	0	0	0	0	0	0	0	0	0	0	0	0
M10Jan2011	2011	Jan	M10	2	Saline	3	1.3	3.6	1.3	18.1	8.17	34.3	8.17	18.1	7.68	34.3	8.12	0	18	80.7917	M10Jan2011	0	0	0	0	0	0	8	0	0	0	0	0	0	0	0	0	0	0	0	0	0	0	0	0	0	0	0	0
M10Jan2011	2011	Jan	M10	3	Saline	3	1.3	3.6	1.3	18.1	8.17	34.3	8.17	18.1	7.68	34.3	8.12	0	18	80.7917	M10Jan2011	0	0	0	0	0	0	3	0	0	0	0	0	0	0	0	0	0	0	0	0	0	0	0	0	0	0	0	0
M11Jan2011	2011	Jan	M11	1	Saline	3	1.9	1.8	1.9	17.4	8.14	34.1	8.06	17.4	8.04	341	8.04	0	17.5	79.315	M11Jan2011	0	0	0	0	0	0	2	0	0	0	0	0	0	0	0	0	0	0	0	0	0	0	0	0	0	0	0	0
M11Jan2011	2011	Jan	M11	2	Saline	3	1.9	1.8	1.9	17.4	8.14	34.1	8.06	17.4	8.04	341	8.04	0	17.5	79.315	M11Jan2011	0	0	0	0	0	0	0	0	0	0	0	0	0	0	0	0	0	0	0	0	0	0	0	0	0	0	0	0
M11Jan2011	2011	Jan	M11	3	Saline	3	1.9	1.8	1.9	17.4	8.14	34.1	8.06	17.4	8.04	341	8.04	0	17.5	79.315	M11Jan2011	0	0	0	0	0	0	0	0	0	0	0	0	0	0	0	0	0	0	0	0	0	0	0	0	0	0	0	0
M12Jan2011	2011	Jan	M12	1	Saline	3	1.6	3.4	1.6	21.1	7.56	34	8.24	21.2	7.4	34	8.22	0	17.9	165.017	M12Jan2011	0	0	0	0	0	0	0	0	0	0	0	0	0	0	0	0	0	0	0	0	0	0	0	0	0	0	0	0
M12Jan2011	2011	Jan	M12	2	Saline	3	1.6	3.4	1.6	21.1	7.56	34	8.24	21.2	7.4	34	8.22	0	17.9	165.017	M12Jan2011	0	0	0	0	0	0	0	0	0	0	0	0	0	0	0	0	0	0	0	0	0	0	0	0	0	0	0	0
M12Jan2011	2011	Jan	M12	3	Saline	3	1.6	3.4	1.6	21.1	7.56	34	8.24	21.2	7.4	34	8.22	0	17.9	165.017	M12Jan2011	0	0	0	0	0	0	0	0	0	0	0	0	0	0	0	0	0	0	0	0	0	0	0	0	0	0	0	0
M13Jan2011	2011	Jan	M13	1	Saline	3	1.5	9	1	19.2	7.85	32.6	8.17	19.2	7.74	32.5	8.14	0	19	183.167	M13Jan2011	1	0	0	0	0	0	0	0	0	0	0	0	0	0	0	0	0	0	0	0	0	0	0	0	0	0	0	0
M13Jan2011	2011	Jan	M13	2	Saline	3	1.5	9	1	19.2	7.85	32.6	8.17	19.2	7.74	32.5	8.14	0	19	183.167	M13Jan2011	0	0	0	0	0	0	0	0	0	0	0	0	0	0	0	0	0	0	0	0	0	0	0	0	0	0	1	0
M13Jan2011	2011	Jan	M13	3	Saline	3	1.5	9	1	19.2	7.85	32.6	8.17	19.2	7.74	32.5	8.14	0	19	183.167	M13Jan2011	5	0	0	0	0	0	0	0	0	0	0	0	0	0	0	2	0	0	0	0	0	0	0	0	0	0	3	0
M14Jan2011	2011	Jan	M14	1	Estuarine	3	1.8	3.9	1.3	18.5	8.92	18.5	8.28	18.2	7.68	20.6	8.2	1	22.9	91.1083	M14Jan2011	0	0	0	0	0	0	0	0	0	0	0	0	0	0	0	0	0	0	0	0	0	0	0	0	0	0	0	0
M14Jan2011	2011	Jan	M14	2	Estuarine	3	1.8	3.9	1.3	18.5	8.92	18.5	8.28	18.2	7.68	20.6	8.2	1	22.9	91.1083	M14Jan2011	0	0	0	0	0	0	0	0	0	0	0	0	0	0	0	0	0	0	0	0	0	0	0	0	0	0	0	0
M14Jan2011	2011	Jan	M14	3	Estuarine	3	1.8	3.9	1.3	18.5	8.92	18.5	8.28	18.2	7.68	20.6	8.2	1	22.9	91.1083	M14Jan2011	0	0	0	0	0	0	0	0	0	0	0	0	0	0	0	0	0	0	0	0	0	0	0	0	0	0	0	0
M01Apr2011	2011	Apr	M01	1	Fresh	3	1.7	5.86	0.9	25.72	7.76	4.23	8.04	25.4	6.57	4.48	7.96	1	24.3	114	M01Apr2011	0	0	0	0	0	0	0	0	0	0	0	0	0	0	0	0	0	0	0	0	0	0	0	0	0	0	0	0
M01Apr2011	2011	Apr	M01	2	Fresh	3	1.7	5.86	0.9	25.72	7.76	4.23	8.04	25.4	6.57	4.48	7.96	1	24.3	114	M01Apr2011	0	0	0	0	0	0	0	0	0	0	0	0	0	0	0	0	0	0	0	0	0	0	0	0	0	0	0	0
M01Apr2011	2011	Apr	M01	3	Fresh	3	1.7	5.86	0.9	25.72	7.76	4.23	8.04	25.4	6.57	4.48	7.96	1	24.3	114	M01Apr2011	0	0	0	0	0	0	0	0	0	0	0	0	0	0	0	0	0	0	0	0	0	0	0	0	0	0	0	0
M02Apr2011	2011	Apr	M02	1	Estuarine	3	2	5.75	1.1	25.52	7.39	12.87	7.93	25.57	4.24	19.4	7.71	1	24.7	192.6	M02Apr2011	0	0	0	0	0	0	0	0	0	0	0	0	0	0	0	0	0	0	0	4	0	0	0	0	0	0	0	0
M02Apr2011	2011	Apr	M02	2	Estuarine	3	2	5.75	1.1	25.52	7.39	12.87	7.93	25.57	4.24	19.4	7.71	1	24.7	192.6	M02Apr2011	0	0	0	0	0	0	0	0	0	0	0	0	0	0	0	0	0	0	0	6	0	0	0	0	0	0	0	0
M02Apr2011	2011	Apr	M02	3	Estuarine	3	2	5.75	1.1	25.52	7.39	12.87	7.93	25.57	4.24	19.4	7.71	1	24.7	192.6	M02Apr2011	0	0	0	0	0	0	0	0	0	0	0	0	0	0	0	0	0	0	0	4	0	0	0	0	0	0	0	0
M03Apr2011	2011	Apr	M03	1	Estuarine	3	2.9	7.54	1.5	25.11	6.47	24.22	7.99	25.49	4.28	25.08	7.83	1	25.1	274.057	M03Apr2011	0	0	0	0	0	0	0	0	0	0	0	0	0	0	0	0	0	0	0	0	0	0	0	0	0	0	0	0
M03Apr2011	2011	Apr	M03	2	Estuarine	3	2.9	7.54	1.5	25.11	6.47	24.22	7.99	25.49	4.28	25.08	7.83	1	25.1	274.057	M03Apr2011	0	0	0	0	0	0	0	0	0	0	0	0	0	0	0	0	0	0	0	0	0	0	0	0	0	0	0	0
M03Apr2011	2011	Apr	M03	3	Estuarine	3	2.9	7.54	1.5	25.11	6.47	24.22	7.99	25.49	4.28	25.08	7.83	1	25.1	274.057	M03Apr2011	0	0	0	0	0	0	0	0	0	0	0	0	0	0	0	0	0	0	0	0	0	0	0	0	0	0	0	0
	2011	Apr	M04	1	Estuarine	3	1.6	4.43	1	25.33	6.24	21.59	7.89	25.94	5.37	25.68	7.87	0	25.5	294.824	M04Apr2011	0	0	0	0	0	0	0	0	0	0	0	0	0	0	0	0	0	0	0	0	0	0	0	0	0	0	0	0
M04Apr2011	2011	Apr	M04	2	Estuarine	3	1.6	4.43	1	25.33	6.24	21.59	7.89	25.94	5.37	25.68	7.87	0	25.5	294.824	M04Apr2011	0	0	0	0	0	0	0	0	0	0	0	0	0	0	0	0	0	0	0	0	0	0	0	0	0	0	0	0
M04Apr2011	2011	Apr	M04	3	Estuarine	3	1.6	4.43	1	25.33	6.24	21.59	7.89	25.94	5.37	25.68	7.87	0	25.5	294.824	M04Apr2011	0	0	0	0	0	0	0	0	0	0	0	0	0	0	0	0	0	0	0	0	0	0	0	0	0	0	0	0
M05Apr2011	2011	Apr	M05	1	Estuarine	3	2.2	7.13	0.9	25.23	6.38	27.49	7.99	25.3	6.34	28.12	8	1	25.6	205.9	M05Apr2011	0	0	0	0	0	0	0	0	0	0	0	0	0	0	0	0	0	0	0	0	0	0	0	0	0	0	0	0
M05Apr2011	2011	Apr	M05	2	Estuarine	3	2.2	7.13	0.9	25.23	6.38	27.49	7.99	25.3	6.34	28.12	8	1	25.6	205.9	M05Apr2011	0	0	0	0	0	0	0	0	0	0	0	0	0	0	0	0	0	0	0	0	0	0	0	0	0	0	0	0
M05Apr2011	2011	Apr	M05	3	Estuarine	3	2.2	7.13	0.9	25.23	6.38	27.49	7.99	25.3	6.34	28.12	8	1	25.6	205.9	M05Apr2011	0	0	0	0	0	0	0	0	0	0	0	0	0	0	0	0	0	0	0	0	0	0	0	0	0	0	0	0
M06Apr2011	2011	Apr	M06	1	Estuarine	3	2.7	7.8	1.2	24.92	7	29.34	8.09	24.97	6.51	30.6	8.11	0	25.2	209.514	M06Apr2011	0	0	0	0	0	0	0	0	0	0	0	0	0	0	0	0	0	0	0	0	0	0	0	0	0	0	0	0
M06Apr2011	2011	Apr	M06	2	Estuarine	3	2.7	7.8	1.2	24.92	7	29.34	8.09	24.97	6.51	30.6	8.11	0	25.2	209.514	M06Apr2011	0	0	0	0	0	0	0	0	0	0	0	0	0	0	0	0	0	0	0	0	0	0	0	0	0	0	0	0
M06Apr2011	2011	Apr	M06	3	Estuarine	3	2.7	7.8	1.2	24.92	7	29.34	8.09	24.97	6.51	30.6	8.11	0	25.2	209.514	M06Apr2011	0	0	0	0	0	0	0	0	0	0	0	0	0	0	0	0	0	0	0	0	0	0	0	0	0	0	0	0
M07Apr2011	2011	Apr	M07	1	Saline	3	2	5.19	0.6	24.91	7.1	33.6	8.22	24.55	6.89	34.29	8.24	0	26	85.2171	M07Apr2011	1	0	0	0	0	0	0	0	0	0	0	0	0	0	0	0	0	0	0	0	0	0	0	0	0	0	0	0
M07Apr2011	2011	Apr	M07	2	Saline	3	2	5.19	0.6	24.91	7.1	33.6	8.22	24.55	6.89	34.29	8.24	0	26	85.2171	M07Apr2011	1	0	0	0	0	0	2	0	0	0	0	0	0	0	0	0	0	0	0	0	0	0	0	0	0	0	0	0
M07Apr2011	2011	Apr	M07	3	Saline	3	2	5.19	0.6	24.91	7.1	33.6	8.22	24.55	6.89	34.29	8.24	0	26	85.2171	M07Apr2011	1	0	0	0	0	0	0	0	0	0	0	0	0	0	0	0	0	0	0	0	0	0	0	0	0	0	0	0
M08Apr2011	2011	Apr	M08	1	Saline	3	1.1	8.91	1.1	25.8	7.34	33.35	8.14	25.83	6.93	33.35	8.14	0	25.9	108.817	M08Apr2011	1	0	0	0	0	0	2	0	0	0	0	0	0	0	0	0	0	0	0	0	0	0	0	0	0	0	0	0
M08Apr2011	2011	Apr	M08	2	Saline	3	1.1	8.91	1.1	25.8	7.34	33.35	8.14	25.83	6.93	33.35	8.14	0	25.9	108.817	M08Apr2011	1	0	0	0	0	0	1	0	0	0	0	0	0	0	0	0	0	0	0	0	0	0	0	0	0	0	0	0
M08Apr2011	2011	Apr	M08	3	Saline	3	1.1	8.91	1.1	25.8	7.34	33.35	8.14	25.83	6.93	33.35	8.14	0	25.9	108.817	M08Apr2011	0	0	0	0	0	0	3	0	0	0	0	0	0	0	0	0	0	0	0	0	0	0	0	0	0	0	0	0
M09Apr2011	2011	Apr	M09	1	Saline	3	1.3	2.62	1.3	24.19	7.11	34.38	8.24	24.2	7.07	34.39	8.24	0	25.9	178.814	M09Apr2011	2	0	0	0	0	0	2	0	0	0	0	0	0	0	0	0	0	0	1	0	0	0	0	0	0	0	0	0
M09Apr2011	2011	Apr	M09	2	Saline	3	1.3	2.62	1.3	24.19	7.11	34.38	8.24	24.2	7.07	34.39	8.24	0	25.9	178.814	M09Apr2011	0	0	0	0	0	0	1	0	0	0	0	0	0	0	0	0	0	0	0	0	0	0	0	0	0	0	0	0
M09Apr2011	2011	Apr	M09	3	Saline	3	1.3	2.62	1.3	24.19	7.11	34.38	8.24	24.2	7.07	34.39	8.24	0	25.9	178.814	M09Apr2011	1	0	0	0	0	0	0	0	0	0	0	0	0	0	0	0	0	0	0	0	0	0	0	0	0	0	0	0
M10Apr2011	2011	Apr	M10	1	Saline	3	1.1	9.04	0	22.35	5.82	35.45	8.1	22.34	5.75	35.46	8.11	0	20.9	80.7917	M10Apr2011	0	0	0	0	0	0	2	0	0	0	0	0	0	0	0	0	0	0	0	0	0	0	0	0	0	0	0	0
M10Apr2011	2011	Apr	M10	2	Saline	3	1.1	9.04	0	22.35	5.82	35.45	8.1	22.34	5.75	35.46	8.11	0	20.9	80.7917	M10Apr2011	0	0	0	0	0	0	2	0	0	0	0	0	0	0	0	0	0	0	0	0	0	0	0	0	0	0	0	0
M10Apr2011	2011	Apr	M10	3	Saline	3	1.1	9.04	0	22.35	5.82	35.45	8.1	22.34	5.75	35.46	8.11	0	20.9	80.7917	M10Apr2011	0	0	0	0	0	0	4	0	0	0	0	0	0	0	0	0	0	0	0	0	0	0	0	0	0	0	0	0
M11Apr2011	2011	Apr	M11	1	Saline	3	1.6	0	0.9	22.8	6.29	35.91	8.25	22.82	6.3	35.91	8.25	0	21.8	79.315	M11Apr2011	0	0	0	0	0	0	2	0	0	0	0	0	0	0	0	0	0	0	0	0	0	0	0	0	0	0	0	0
M11Apr2011	2011	Apr	M11	2	Saline	3	1.6	0	0.9	22.8	6.29	35.91	8.25	22.82	6.3	35.91	8.25	0	21.8	79.315	M11Apr2011	0	0	0	0	0	0	0	0	0	0	0	0	0	0	0	0	0	0	0	0	0	0	0	0	0	0	0	0
M11Apr2011	2011	Apr	M11	3	Saline	3	1.6	0	0.9	22.8	6.29	35.91	8.25	22.82	6.3	35.91	8.25	0	21.8	79.315	M11Apr2011	0	0	0	0	0	0	1	0	0	0	0	0	0	0	0	0	0	0	0	0	0	0	0	0	0	0	0	0
M12Apr2011	2011	Apr	M12	1	Saline	3	1.5	7.57	1	22.57	6.78	34.83	8.26	22.52	6.44	34.81	8.26	0	22	165.017	M12Apr2011	0	0	0	0	0	0	1	0	0	0	0	0	0	0	0	0	0	0	0	0	0	0	0	0	0	0	0	0
M12Apr2011	2011	Apr	M12	2	Saline	3	1.5	7.57	1	22.57	6.78	34.83	8.26	22.52	6.44	34.81	8.26	0	22	165.017	M12Apr2011	0	0	0	0	0	0	0	0	0	0	0	0	0	0	0	0	0	0	0	0	0	0	0	0	0	0	0	0
M12Apr2011	2011	Apr	M12	3	Saline	3	1.5	7.57	1	22.57	6.78	34.83	8.26	22.52	6.44	34.81	8.26	0	22	165.017	M12Apr2011	0	0	0	0	0	0	0	0	0	0	0	0	0	0	0	0	0	0	0	0	0	0	0	0	0	0	0	0
M13Apr2011	2011	Apr	M13	1	Saline	3	1	9.6	0.9	22.14	6.21	34.61	8.26	22.14	6.15	34.62	8.25	0	22.1	183.167	M13Apr2011	0	0	0	0	1	0	0	0	0	0	0	0	0	0	0	1	0	0	0	0	0	0	0	0	0	0	0	0
M13Apr2011	2011	Apr	M13	2	Saline	3	1	9.6	0.9	22.14	6.21	34.61	8.26	22.14	6.15	34.62	8.25	0	22.1	183.167	M13Apr2011	0	0	0	0	2	0	0	0	0	0	0	0	0	0	0	0	0	0	0	0	0	0	0	0	0	0	0	0
M13Apr2011	2011	Apr	M13	3	Saline	3	1	9.6	0.9	22.14	6.21	34.61	8.26	22.14	6.15	34.62	8.25	0	22.1	183.167	M13Apr2011	0	0	0	0	0	0	1	0	0	0	0	0	0	0	0	1	0	0	0	0	0	0	0	0	0	0	0	0
M14Apr2011	2011	Apr	M14	1	Estuarine	3	1.8	3.75	1.4	25.74	6.92	12.65	7.91	26.27	5.55	15.58	7.73	0	24.5	91.1083	M14Apr2011	0	0	0	0	0	0	0	0	0	0	0	0	0	0	0	0	0	0	0	0	0	0	0	0	0	0	0	0
M14Apr2011	2011	Apr	M14	2	Estuarine	3	1.8	3.75	1.4	25.74	6.92	12.65	7.91	26.27	5.55	15.58	7.73	0	24.5	91.1083	M14Apr2011	0	0	0	0	0	0	0	0	0	0	0	0	0	0	0	0	0	0	0	0	0	0	0	0	0	0	0	0
M14Apr2011	2011	Apr	M14	3	Estuarine	3	1.8	3.75	1.4	25.74	6.92	12.65	7.91	26.27	5.55	15.58	7.73	0	24.5	91.1083	M14Apr2011	0	0	0	0	0	0	0	0	0	0	0	0	0	0	0	0	0	0	0	0	0	0	0	0	0	0	0	0
M15Apr2011	2011	Apr	M15	1	Fresh	3	1.8	4.4	1.3	24.27	7.36	1.15	7.98	24.07	6.87	1.15	7.94	0	23.2	111.3	M15Apr2011	0	0	0	0	0	0	0	0	0	0	0	0	0	0	0	0	0	0	0	0	0	0	0	0	0	0	0	0
M15Apr2011	2011	Apr	M15	2	Fresh	3	1.8	4.4	1.3	24.27	7.36	1.15	7.98	24.07	6.87	1.15	7.94	0	23.2	111.3	M15Apr2011	0	0	0	0	0	0	0	0	0	0	0	0	0	0	0	0	0	0	0	0	0	0	0	0	0	0	0	0
M15Apr2011	2011	Apr	M15	3	Fresh	3	1.8	4.4	1.3	24.27	7.36	1.15	7.98	24.07	6.87	1.15	7.94	0	23.2	111.3	M15Apr2011	0	0	0	0	0	0	0	0	0	0	0	0	0	0	0	0	0	0	0	0	0	0	0	0	0	0	0	0
M01Jul2011	2011	Jul	M01	1	Fresh	3	1.7	5.35	0.9	29.32	4.5	7.96	7.96	29.31	4.09	0.82	7.95	1	29.2	114	M01Jul2011	0	0	0	0	0	0	0	0	0	0	0	0	0	0	0	0	0	0	0	0	0	0	0	0	0	0	0	0
M01Jul2011	2011	Jul	M01	2	Fresh	3	1.7	5.35	0.9	29.32	4.5	7.96	7.96	29.31	4.09	0.82	7.95	1	29.2	114	M01Jul2011	0	0	0	0	0	0	0	0	0	0	0	0	0	0	0	0	0	0	0	0	0	0	0	0	0	0	0	0
M01Jul2011	2011	Jul	M01	3	Fresh	3	1.7	5.35	0.9	29.32	4.5	7.96	7.96	29.31	4.09	0.82	7.95	1	29.2	114	M01Jul2011	0	0	0	0	0	0	0	0	0	0	0	0	0	0	0	0	0	0	0	0	0	0	0	0	0	0	0	0
M02Jul2011	2011	Jul	M02	1	Estuarine	3	1.6	8.08	0.6	29.45	3.54	2.29	7.88	29.51	2.9	2.45	7.84	0	26.8	192.6	M02Jul2011	0	0	0	0	0	0	0	0	0	0	0	0	0	0	0	0	0	0	0	2	0	0	0	0	0	0	2	0
M02Jul2011	2011	Jul	M02	2	Estuarine	3	1.6	8.08	0.6	29.45	3.54	2.29	7.88	29.51	2.9	2.45	7.84	0	26.8	192.6	M02Jul2011	0	0	0	0	0	0	0	0	0	0	0	0	0	0	0	0	0	0	0	2	0	0	0	0	0	0	1	0
M02Jul2011	2011	Jul	M02	3	Estuarine	3	1.6	8.08	0.6	29.45	3.54	2.29	7.88	29.51	2.9	2.45	7.84	0	26.8	192.6	M02Jul2011	0	0	0	0	0	0	0	0	0	0	0	0	0	0	0	0	0	0	0	1	0	0	0	0	0	0	1	0
M03Jul2011	2011	Jul	M03	1	Estuarine	3	2.9	3.69	1.1	29.05	5.59	8.87	8.33	29.77	1.7	19.39	8.05	1	28.9	274.057	M03Jul2011	0	0	0	0	0	0	0	0	0	0	0	0	0	0	0	0	0	0	0	0	0	0	0	0	0	0	0	0
M03Jul2011	2011	Jul	M03	2	Estuarine	3	2.9	3.69	1.1	29.05	5.59	8.87	8.33	29.77	1.7	19.39	8.05	1	28.9	274.057	M03Jul2011	0	0	0	0	0	0	0	0	0	0	0	0	0	0	0	0	0	0	0	0	0	0	0	0	0	0	0	0
M03Jul2011	2011	Jul	M03	3	Estuarine	3	2.9	3.69	1.1	29.05	5.59	8.87	8.33	29.77	1.7	19.39	8.05	1	28.9	274.057	M03Jul2011	0	0	0	0	0	0	0	0	0	0	0	0	0	0	0	0	0	0	0	0	0	0	0	0	0	0	0	0
M04Jul2011	2011	Jul	M04	1	Estuarine	3	1.7	4.72	0.9	29.61	4.56	17.14	8.29	29.9	2.6	19.01	8.19	0	30.9	294.824	M04Jul2011	0	0	0	0	0	0	0	0	0	0	0	0	0	0	0	0	0	0	0	0	0	0	0	0	0	0	0	0
M04Jul2011	2011	Jul	M04	2	Estuarine	3	1.7	4.72	0.9	29.61	4.56	17.14	8.29	29.9	2.6	19.01	8.19	0	30.9	294.824	M04Jul2011	0	0	0	0	0	0	0	0	0	0	0	0	0	0	0	0	0	0	0	0	0	0	0	0	0	0	0	0
M04Jul2011	2011	Jul	M04	3	Estuarine	3	1.7	4.72	0.9	29.61	4.56	17.14	8.29	29.9	2.6	19.01	8.19	0	30.9	294.824	M04Jul2011	0	0	0	0	0	0	0	0	0	0	0	0	0	0	0	0	0	0	0	0	0	0	0	0	0	0	0	0
M05Jul2011	2011	Jul	M05	1	Estuarine	3	2.2	3.95	1.5	29.1	5.26	21.34	8.4	29.53	4.75	26.44	8.44	1	28.2	205.9	M05Jul2011	0	0	0	0	0	0	0	0	0	0	0	0	0	0	0	0	0	0	0	0	0	0	0	0	0	0	0	0
M05Jul2011	2011	Jul	M05	2	Estuarine	3	2.2	3.95	1.5	29.1	5.26	21.34	8.4	29.53	4.75	26.44	8.44	1	28.2	205.9	M05Jul2011	0	0	0	0	0	0	0	0	0	0	0	0	0	0	0	0	0	0	0	0	0	0	0	0	0	0	0	0
M05Jul2011	2011	Jul	M05	3	Estuarine	3	2.2	3.95	1.5	29.1	5.26	21.34	8.4	29.53	4.75	26.44	8.44	1	28.2	205.9	M05Jul2011	0	0	0	0	0	0	0	0	0	0	0	0	0	0	0	0	0	0	0	0	0	0	0	0	0	0	0	0
M06Jul2011	2011	Jul	M06	1	Estuarine	3	2.9	3.44	1	28.41	6.54	24.16	8.47	28.25	6.05	29.32	8.57	0	27.1	209.514	M06Jul2011	0	0	0	0	0	0	0	0	0	0	0	0	0	0	0	0	0	0	0	0	0	0	0	0	0	0	0	0
M06Jul2011	2011	Jul	M06	2	Estuarine	3	2.9	3.44	1	28.41	6.54	24.16	8.47	28.25	6.05	29.32	8.57	0	27.1	209.514	M06Jul2011	0	0	0	0	0	0	0	0	0	0	0	0	0	0	0	1	0	0	0	0	0	0	0	0	0	0	0	0
M06Jul2011	2011	Jul	M06	3	Estuarine	3	2.9	3.44	1	28.41	6.54	24.16	8.47	28.25	6.05	29.32	8.57	0	27.1	209.514	M06Jul2011	0	0	0	0	0	0	0	0	0	0	0	0	0	0	0	1	0	0	0	0	0	0	0	0	0	0	0	0
M07Jul2011	2011	Jul	M07	1	Saline	3	2	2.55	1.6	27.6	7.67	30.49	8.66	26.41	8.55	33.06	8.74	0	29.3	85.2171	M07Jul2011	0	0	0	0	0	0	0	0	0	0	0	0	0	0	0	0	0	0	0	0	0	0	0	0	0	0	0	0
M07Jul2011	2011	Jul	M07	2	Saline	3	2	2.55	1.6	27.6	7.67	30.49	8.66	26.41	8.55	33.06	8.74	0	29.3	85.2171	M07Jul2011	0	1	0	0	0	0	0	0	0	0	0	0	0	0	0	0	0	0	0	0	0	0	0	0	0	0	0	0
M07Jul2011	2011	Jul	M07	3	Saline	3	2	2.55	1.6	27.6	7.67	30.49	8.66	26.41	8.55	33.06	8.74	0	29.3	85.2171	M07Jul2011	0	0	0	0	0	0	0	0	0	0	0	0	0	0	0	0	0	0	0	0	0	0	0	0	0	0	0	0
M08Jul2011	2011	Jul	M08	1	Saline	3	0.9	3.24	9.9	30.02	6.53	32.14	8.59	30.03	6.76	32.14	8.59	0	29.6	108.817	M08Jul2011	0	0	0	0	0	0	2	0	0	0	3	0	0	0	0	1	0	0	0	0	0	0	0	0	0	0	0	0
M08Jul2011	2011	Jul	M08	2	Saline	3	0.9	3.24	9.9	30.02	6.53	32.14	8.59	30.03	6.76	32.14	8.59	0	29.6	108.817	M08Jul2011	0	0	0	0	0	0	2	0	0	0	0	0	0	0	0	1	0	0	0	0	0	0	0	0	0	0	0	0
M08Jul2011	2011	Jul	M08	3	Saline	3	0.9	3.24	9.9	30.02	6.53	32.14	8.59	30.03	6.76	32.14	8.59	0	29.6	108.817	M08Jul2011	0	1	0	0	0	0	4	0	0	0	1	0	0	0	0	0	0	0	0	0	0	0	0	0	0	0	0	0
M09Jul2011	2011	Jul	M09	1	Saline	3	1.4	2.62	9.9	27.23	7.91	32.98	8.72	27.2	7.67	32.98	8.72	0	31.2	178.814	M09Jul2011	0	0	0	0	0	0	0	0	0	0	0	0	0	0	0	0	0	0	0	0	0	0	0	0	0	0	0	0
M09Jul2011	2011	Jul	M09	2	Saline	3	1.4	2.62	9.9	27.23	7.91	32.98	8.72	27.2	7.67	32.98	8.72	0	31.2	178.814	M09Jul2011	0	0	0	0	0	0	1	0	0	0	1	0	0	0	0	0	0	0	0	0	0	0	0	0	0	0	0	0
M09Jul2011	2011	Jul	M09	3	Saline	3	1.4	2.62	9.9	27.23	7.91	32.98	8.72	27.2	7.67	32.98	8.72	0	31.2	178.814	M09Jul2011	0	0	0	0	0	0	0	0	0	0	2	0	0	0	0	0	0	0	0	0	0	0	0	0	0	0	0	0
M10Jul2011	2011	Jul	M10	1	Saline	3	1.4	6.97	1	30.11	5.07	34.38	8.44	29.87	4.57	34.41	8.44	0	30	80.7917	M10Jul2011	0	0	0	0	0	0	2	0	0	0	2	0	0	0	0	0	0	0	0	0	0	0	0	0	0	0	0	0
M10Jul2011	2011	Jul	M10	2	Saline	3	1.4	6.97	1	30.11	5.07	34.38	8.44	29.87	4.57	34.41	8.44	0	30	80.7917	M10Jul2011	0	0	0	0	0	0	0	0	0	0	1	0	0	0	0	0	0	0	0	0	0	0	0	0	0	0	0	0
M10Jul2011	2011	Jul	M10	3	Saline	3	1.4	6.97	1	30.11	5.07	34.38	8.44	29.87	4.57	34.41	8.44	0	30	80.7917	M10Jul2011	0	0	0	0	0	0	2	0	0	0	0	0	0	0	0	0	0	0	0	0	0	0	0	0	0	0	0	0
M11Jul2011	2011	Jul	M11	1	Saline	3	1.9	9.1	1	30.75	6.8	35.43	8.44	30.14	5.1	35.64	8.46	0	30.6	79.315	M11Jul2011	0	0	0	0	0	0	1	0	0	0	0	0	0	0	0	0	0	0	0	0	0	0	0	0	0	0	0	0
M11Jul2011	2011	Jul	M11	2	Saline	3	1.9	9.1	1	30.75	6.8	35.43	8.44	30.14	5.1	35.64	8.46	0	30.6	79.315	M11Jul2011	0	0	0	0	0	0	0	0	0	0	0	0	0	0	0	0	0	0	0	0	0	0	0	0	0	0	0	0
M11Jul2011	2011	Jul	M11	3	Saline	3	1.9	9.1	1	30.75	6.8	35.43	8.44	30.14	5.1	35.64	8.46	0	30.6	79.315	M11Jul2011	0	0	0	0	0	0	3	0	0	0	0	0	0	0	0	0	0	0	0	0	0	0	0	0	0	0	0	0
M12Jul2011	2011	Jul	M12	1	Saline	3	1.3	3.69	9.9	26.96	8.12	33.8	8.58	26.9	7.86	33.8	8.58	0	29.6	165.017	M12Jul2011	0	0	0	0	0	0	1	0	0	0	0	0	0	0	0	0	0	0	0	0	0	0	0	0	0	0	0	0
M12Jul2011	2011	Jul	M12	2	Saline	3	1.3	3.69	9.9	26.96	8.12	33.8	8.58	26.9	7.86	33.8	8.58	0	29.6	165.017	M12Jul2011	0	0	0	0	0	0	0	0	0	0	0	0	0	0	0	0	0	0	0	0	0	0	0	0	0	0	0	0
M12Jul2011	2011	Jul	M12	3	Saline	3	1.3	3.69	9.9	26.96	8.12	33.8	8.58	26.9	7.86	33.8	8.58	0	29.6	165.017	M12Jul2011	0	0	0	0	0	0	0	0	0	0	0	0	0	0	0	0	0	0	0	0	0	0	0	0	0	0	0	0
M13Jul2011	2011	Jul	M13	1	Saline	3	1.2	4.48	9.9	28.78	6.61	33.48	8.46	28.75	6.48	33.48	8.47	0	31.6	183.167	M13Jul2011	0	0	0	0	0	0	0	0	0	0	0	0	0	0	0	0	0	0	0	0	0	0	0	0	0	0	0	0
M13Jul2011	2011	Jul	M13	2	Saline	3	1.2	4.48	9.9	28.78	6.61	33.48	8.46	28.75	6.48	33.48	8.47	0	31.6	183.167	M13Jul2011	0	5	0	0	0	0	0	0	0	0	0	0	0	0	0	0	0	0	0	0	0	0	0	0	0	0	0	0
M13Jul2011	2011	Jul	M13	3	Saline	3	1.2	4.48	9.9	28.78	6.61	33.48	8.46	28.75	6.48	33.48	8.47	0	31.6	183.167	M13Jul2011	0	0	0	0	0	0	0	0	0	0	0	0	0	0	0	0	0	0	0	0	2	0	0	0	0	0	0	0
M14Jul2011	2011	Jul	M14	1	Estuarine	3	2.5	4.29	1.2	29.81	5.14	13.2	8.23	29.95	3.21	15.46	8.09	1	31	91.1083	M14Jul2011	0	0	0	0	0	0	0	0	0	0	0	0	0	0	0	0	0	0	0	0	0	0	0	0	0	0	0	0
M14Jul2011	2011	Jul	M14	2	Estuarine	3	2.5	4.29	1.2	29.81	5.14	13.2	8.23	29.95	3.21	15.46	8.09	1	31	91.1083	M14Jul2011	0	0	0	0	0	0	0	0	0	0	0	0	0	0	0	0	0	0	0	0	0	0	0	0	0	0	0	0
M14Jul2011	2011	Jul	M14	3	Estuarine	3	2.5	4.29	1.2	29.81	5.14	13.2	8.23	29.95	3.21	15.46	8.09	1	31	91.1083	M14Jul2011	0	0	0	0	0	0	0	0	0	0	0	0	0	0	0	0	0	0	0	0	0	0	0	0	0	0	0	0
M01Oct2011	2011	Oct	M01	1	Fresh	3	1.7	5.3	1	26.7	6.2	0.7	8.38	26.6	5.81	0.7	8.38	0	29.1	114	M01Oct2011	0	0	0	0	0	0	0	0	0	0	0	0	0	0	0	0	0	0	0	0	0	0	0	0	0	0	0	0
M01Oct2011	2011	Oct	M01	2	Fresh	3	1.7	5.3	1	26.7	6.2	0.7	8.38	26.6	5.81	0.7	8.38	0	29.1	114	M01Oct2011	0	0	0	0	0	0	0	0	0	0	0	0	0	0	0	0	0	0	0	0	0	0	0	0	0	0	0	0
M01Oct2011	2011	Oct	M01	3	Fresh	3	1.7	5.3	1	26.7	6.2	0.7	8.38	26.6	5.81	0.7	8.38	0	29.1	114	M01Oct2011	0	0	0	0	0	0	0	0	0	0	0	0	0	0	0	0	0	0	0	0	0	0	0	0	0	0	0	0
M02Oct2011	2011	Oct	M02	1	Estuarine	3	2.2	3.1	0.9	27	4.16	4.9	8.35	37.1	3.94	5.4	8.29	1	29.5	192.6	M02Oct2011	0	0	0	0	0	0	0	0	0	0	0	0	0	0	0	0	0	0	0	0	0	0	0	0	0	0	0	0
M02Oct2011	2011	Oct	M02	2	Estuarine	3	2.2	3.1	0.9	27	4.16	4.9	8.35	37.1	3.94	5.4	8.29	1	29.5	192.6	M02Oct2011	0	0	0	0	0	0	0	0	0	0	0	0	0	0	0	0	0	0	0	0	1	0	0	0	0	0	0	0
M02Oct2011	2011	Oct	M02	3	Estuarine	3	2.2	3.1	0.9	27	4.16	4.9	8.35	37.1	3.94	5.4	8.29	1	29.5	192.6	M02Oct2011	0	0	0	0	0	0	0	0	0	0	0	0	0	0	0	0	0	0	0	0	0	0	0	0	0	0	0	0
M03Oct2011	2011	Oct	M03	1	Estuarine	3	3.1	2.3	1.4	26.7	6.17	11.5	8.59	27.8	4.16	14	8.47	1	26.8	274.057	M03Oct2011	0	0	0	0	0	0	0	0	0	0	0	0	0	0	0	0	0	0	0	0	0	0	0	0	0	0	0	0
M03Oct2011	2011	Oct	M03	2	Estuarine	3	3.1	2.3	1.4	26.7	6.17	11.5	8.59	27.8	4.16	14	8.47	1	26.8	274.057	M03Oct2011	0	0	0	0	0	0	0	0	0	0	0	0	0	0	0	0	0	0	0	0	0	0	0	0	0	0	0	0
M03Oct2011	2011	Oct	M03	3	Estuarine	3	3.1	2.3	1.4	26.7	6.17	11.5	8.59	27.8	4.16	14	8.47	1	26.8	274.057	M03Oct2011	0	0	0	0	0	0	0	0	0	0	0	0	0	0	0	0	0	0	0	0	0	0	0	0	0	0	0	0
M04Oct2011	2011	Oct	M04	1	Estuarine	3	2	6.5	0.8	26.2	6.24	9.4	8.49	26.2	6.24	9.4	8.49	0	26.8	294.824	M04Oct2011	0	0	0	0	0	0	0	0	0	0	0	0	0	0	0	0	0	0	0	0	0	0	0	0	0	0	0	0
M04Oct2011	2011	Oct	M04	2	Estuarine	3	2	6.5	0.8	26.2	6.24	9.4	8.49	26.2	6.24	9.4	8.49	0	26.8	294.824	M04Oct2011	0	0	0	0	0	0	0	0	0	0	0	0	0	0	0	0	0	0	0	0	0	0	0	0	0	0	0	0
M04Oct2011	2011	Oct	M04	3	Estuarine	3	2	6.5	0.8	26.2	6.24	9.4	8.49	26.2	6.24	9.4	8.49	0	26.8	294.824	M04Oct2011	0	0	0	0	0	0	0	0	0	0	0	0	0	0	0	0	0	0	0	0	0	0	0	0	0	0	0	0
M05Oct2011	2011	Oct	M05	1	Estuarine	3	2.2	5.5	1.3	26.5	5.97	16.2	8.64	27	4.73	19.8	8.56	1	26.4	205.9	M05Oct2011	0	0	0	0	0	0	0	0	0	0	0	0	0	0	0	0	0	0	0	0	0	0	0	0	0	0	0	0
M05Oct2011	2011	Oct	M05	2	Estuarine	3	2.2	5.5	1.3	26.5	5.97	16.2	8.64	27	4.73	19.8	8.56	1	26.4	205.9	M05Oct2011	0	0	0	0	0	0	0	0	0	0	0	0	0	0	0	0	0	0	0	0	0	0	0	0	0	0	0	0
M05Oct2011	2011	Oct	M05	3	Estuarine	3	2.2	5.5	1.3	26.5	5.97	16.2	8.64	27	4.73	19.8	8.56	1	26.4	205.9	M05Oct2011	0	0	0	0	0	0	0	0	0	0	0	0	0	0	0	0	0	0	0	0	0	0	0	0	0	0	0	0
M06Oct2011	2011	Oct	M06	1	Estuarine	3	2.8	4	1.2	26.6	6.53	25.8	8.8	27.6	5.55	29.8	8.8	0	26.4	209.514	M06Oct2011	0	0	0	0	0	0	1	0	0	0	0	0	0	0	0	0	0	0	0	0	0	0	0	0	0	0	0	0
M06Oct2011	2011	Oct	M06	2	Estuarine	3	2.8	4	1.2	26.6	6.53	25.8	8.8	27.6	5.55	29.8	8.8	0	26.4	209.514	M06Oct2011	0	0	0	0	0	0	1	0	0	0	3	0	0	0	0	0	0	0	0	0	0	0	0	0	0	0	0	0
M06Oct2011	2011	Oct	M06	3	Estuarine	3	2.8	4	1.2	26.6	6.53	25.8	8.8	27.6	5.55	29.8	8.8	0	26.4	209.514	M06Oct2011	0	0	0	0	0	0	0	0	0	0	0	0	0	0	0	0	0	0	0	0	0	0	0	0	0	0	0	0
M07Oct2011	2011	Oct	M07	1	Saline	3	2.3	4.7	1.2	26.8	6.53	28.1	8.72	26.8	6.4	28.1	8.72	0	26.7	85.2171	M07Oct2011	0	0	0	0	0	0	0	0	0	0	0	0	0	0	0	0	0	0	0	0	0	0	0	0	0	0	0	0
M07Oct2011	2011	Oct	M07	2	Saline	3	2.3	4.7	1.2	26.8	6.53	28.1	8.72	26.8	6.4	28.1	8.72	0	26.7	85.2171	M07Oct2011	0	0	0	0	0	0	0	0	0	0	0	0	0	0	0	0	0	0	0	0	0	0	0	0	0	0	0	0
M07Oct2011	2011	Oct	M07	3	Saline	3	2.3	4.7	1.2	26.8	6.53	28.1	8.72	26.8	6.4	28.1	8.72	0	26.7	85.2171	M07Oct2011	0	1	0	0	0	0	1	0	0	0	2	0	0	0	0	0	0	0	0	0	0	0	0	0	0	0	0	0
M09Oct2011	2011	Oct	M09	1	Saline	3	1.5	7.5	1	26.3	6.69	30.8	8.72	26.3	6.55	30.8	8.72	0	26.7	178.814	M09Oct2011	0	0	0	0	0	0	0	0	0	0	0	0	0	0	0	0	0	0	0	0	0	0	0	0	0	0	0	0
M09Oct2011	2011	Oct	M09	2	Saline	3	1.5	7.5	1	26.3	6.69	30.8	8.72	26.3	6.55	30.8	8.72	0	26.7	178.814	M09Oct2011	0	1	0	0	0	0	0	0	0	0	1	0	0	0	0	0	0	0	0	0	0	0	0	0	0	0	0	0
M09Oct2011	2011	Oct	M09	3	Saline	3	1.5	7.5	1	26.3	6.69	30.8	8.72	26.3	6.55	30.8	8.72	0	26.7	178.814	M09Oct2011	0	0	0	0	0	0	4	0	0	0	1	0	0	0	0	0	0	0	0	0	0	0	0	0	0	0	0	0
M10Oct2011	2011	Oct	M10	1	Saline	3	1.8	13.9	1	25.1	5.66	30.4	8.72	25.6	5.7	30.4	8.43	0	26.4	80.7917	M10Oct2011	0	0	0	0	0	0	0	0	0	0	0	0	0	0	0	0	0	0	0	0	0	0	0	0	0	0	0	0
M10Oct2011	2011	Oct	M10	2	Saline	3	1.8	13.9	1	25.1	5.66	30.4	8.72	25.6	5.7	30.4	8.43	0	26.4	80.7917	M10Oct2011	0	0	0	0	0	0	7	0	0	0	1	0	0	0	0	0	0	0	0	0	0	0	0	0	0	0	0	0
M10Oct2011	2011	Oct	M10	3	Saline	3	1.8	13.9	1	25.1	5.66	30.4	8.72	25.6	5.7	30.4	8.43	0	26.4	80.7917	M10Oct2011	0	0	0	0	0	0	0	0	0	0	4	0	0	0	0	0	0	0	0	0	0	0	0	0	0	0	0	0
M11Oct2011	2011	Oct	M11	1	Saline	3	2.2	10	1	25.4	6.33	33.1	8.51	25.4	6.17	33.1	8.52	0	26.7	79.315	M11Oct2011	0	0	0	0	0	0	2	0	0	0	0	0	0	0	0	0	0	0	0	0	0	0	0	0	0	0	0	0
M11Oct2011	2011	Oct	M11	2	Saline	3	2.2	10	1	25.4	6.33	33.1	8.51	25.4	6.17	33.1	8.52	0	26.7	79.315	M11Oct2011	0	0	0	0	0	0	3	0	0	0	0	0	0	0	0	0	0	0	0	0	0	0	0	0	0	0	0	0
M11Oct2011	2011	Oct	M11	3	Saline	3	2.2	10	1	25.4	6.33	33.1	8.51	25.4	6.17	33.1	8.52	0	26.7	79.315	M11Oct2011	0	0	0	0	0	0	0	0	0	0	0	0	0	0	0	0	0	0	0	0	0	0	0	0	0	0	0	0
M12Oct2011	2011	Oct	M12	1	Saline	3	1.7	5	1.6	26.1	6.08	32.4	8.51	26.1	5.82	32.4	8.53	0	26.4	165.017	M12Oct2011	0	0	0	0	0	0	0	0	0	0	0	0	0	0	0	0	0	0	0	0	0	0	0	0	0	0	0	0
M12Oct2011	2011	Oct	M12	2	Saline	3	1.7	5	1.6	26.1	6.08	32.4	8.51	26.1	5.82	32.4	8.53	0	26.4	165.017	M12Oct2011	2	0	0	0	0	0	0	0	0	0	0	0	0	0	0	0	0	0	0	0	0	0	0	0	0	0	0	0
M12Oct2011	2011	Oct	M12	3	Saline	3	1.7	5	1.6	26.1	6.08	32.4	8.51	26.1	5.82	32.4	8.53	0	26.4	165.017	M12Oct2011	3	0	0	0	0	0	2	0	0	0	0	0	0	0	0	0	0	0	0	0	0	0	0	0	0	0	0	0
M13Oct2011	2011	Oct	M13	1	Saline	3	1.3	10.4	1	25.1	5.74	27.7	8.48	25.1	5.55	27.7	8.48	0	26.1	183.167	M13Oct2011	0	0	0	0	0	0	0	0	0	0	0	0	0	0	0	0	0	0	0	0	0	0	0	0	0	0	0	0
M13Oct2011	2011	Oct	M13	2	Saline	3	1.3	10.4	1	25.1	5.74	27.7	8.48	25.1	5.55	27.7	8.48	0	26.1	183.167	M13Oct2011	0	0	0	0	0	0	0	0	0	0	0	0	0	0	0	0	0	0	0	0	0	0	0	0	0	0	0	0
M13Oct2011	2011	Oct	M13	3	Saline	3	1.3	10.4	1	25.1	5.74	27.7	8.48	25.1	5.55	27.7	8.48	0	26.1	183.167	M13Oct2011	0	0	0	0	0	0	0	0	0	0	0	0	0	0	0	0	0	0	0	0	0	0	0	0	0	0	0	0
M14Oct2011	2011	Oct	M14	1	Estuarine	3	2.1	4.6	0.7	26.7	4.37	4.6	8.53	27.6	3.75	6.8	8.47	1	27.3	91.1083	M14Oct2011	0	0	0	0	0	0	0	0	0	0	0	0	0	0	0	0	0	0	0	0	0	0	0	0	0	0	0	0
M14Oct2011	2011	Oct	M14	2	Estuarine	3	2.1	4.6	0.7	26.7	4.37	4.6	8.53	27.6	3.75	6.8	8.47	1	27.3	91.1083	M14Oct2011	0	0	0	0	0	0	0	0	0	0	0	0	0	0	0	0	0	0	0	0	0	0	0	0	0	0	0	0
M14Oct2011	2011	Oct	M14	3	Estuarine	3	2.1	4.6	0.7	26.7	4.37	4.6	8.53	27.6	3.75	6.8	8.47	1	27.3	91.1083	M14Oct2011	0	0	0	0	0	0	0	0	0	0	0	0	0	0	0	0	0	0	0	0	0	0	0	0	0	0	0	0
M01Jan2012	2012	Jan	M01	1	Fresh	3	1.6	5.5	1	15.7	9.32	0.6	8.09	15.7	9.26	0.6	8.03	0	19.3	114	M01Jan2012	0	0	0	0	0	0	0	0	0	0	0	0	0	0	0	0	0	0	0	0	0	0	0	0	0	0	0	0
M01Jan2012	2012	Jan	M01	2	Fresh	3	1.6	5.5	1	15.7	9.32	0.6	8.09	15.7	9.26	0.6	8.03	0	19.3	114	M01Jan2012	0	0	0	0	0	0	0	0	0	0	0	0	0	0	0	0	0	0	0	0	0	0	0	0	0	0	0	0
M01Jan2012	2012	Jan	M01	3	Fresh	3	1.6	5.5	1	15.7	9.32	0.6	8.09	15.7	9.26	0.6	8.03	0	19.3	114	M01Jan2012	0	0	0	0	0	0	0	0	0	0	0	0	0	0	0	0	0	0	0	0	0	0	0	0	0	0	0	0
M02Jan2012	2012	Jan	M02	1	Estuarine	3	1.6	4	1.1	16.9	8.41	5.5	8.1	16.7	7.96	7.5	8.09	1	16.8	192.6	M02Jan2012	0	0	0	0	0	0	0	0	0	0	0	0	0	0	0	0	0	0	0	0	0	0	0	0	0	0	0	0
M02Jan2012	2012	Jan	M02	2	Estuarine	3	1.6	4	1.1	16.9	8.41	5.5	8.1	16.7	7.96	7.5	8.09	1	16.8	192.6	M02Jan2012	0	0	0	0	0	0	0	0	0	0	0	0	0	0	0	0	0	0	0	0	0	0	0	0	0	0	0	0
M02Jan2012	2012	Jan	M02	3	Estuarine	3	1.6	4	1.1	16.9	8.41	5.5	8.1	16.7	7.96	7.5	8.09	1	16.8	192.6	M02Jan2012	0	0	0	0	0	0	0	0	0	0	0	0	0	0	0	0	0	0	0	0	0	0	0	0	0	0	0	0
M04Jan2012	2012	Jan	M04	1	Estuarine	3	1.8	3.8	1.4	15.2	10.11	8.8	8.23	16.1	7.84	17.2	8.19	0	16.1	294.824	M04Jan2012	0	0	0	0	0	0	0	0	0	0	0	0	0	0	0	0	0	0	0	0	0	0	0	0	0	0	0	0
M04Jan2012	2012	Jan	M04	2	Estuarine	3	1.8	3.8	1.4	15.2	10.11	8.8	8.23	16.1	7.84	17.2	8.19	0	16.1	294.824	M04Jan2012	0	0	0	0	0	0	0	0	0	0	0	0	0	0	0	0	0	0	0	0	0	0	0	0	0	0	0	0
M04Jan2012	2012	Jan	M04	3	Estuarine	3	1.8	3.8	1.4	15.2	10.11	8.8	8.23	16.1	7.84	17.2	8.19	0	16.1	294.824	M04Jan2012	0	0	0	0	0	0	0	0	0	0	0	0	0	0	0	0	0	0	0	0	0	0	0	0	0	0	0	0
M05Jan2012	2012	Jan	M05	1	Estuarine	3	2.3	2.6	1.8	14.5	8.62	19.3	8.21	16.3	7.42	25.2	8.38	1	14	205.9	M05Jan2012	0	0	0	0	0	0	0	0	0	0	0	0	0	0	0	0	0	0	0	0	0	0	0	0	0	0	0	0
M05Jan2012	2012	Jan	M05	2	Estuarine	3	2.3	2.6	1.8	14.5	8.62	19.3	8.21	16.3	7.42	25.2	8.38	1	14	205.9	M05Jan2012	0	0	0	0	0	0	0	0	0	0	0	0	0	0	0	0	0	0	0	0	0	0	0	0	0	0	0	0
M05Jan2012	2012	Jan	M05	3	Estuarine	3	2.3	2.6	1.8	14.5	8.62	19.3	8.21	16.3	7.42	25.2	8.38	1	14	205.9	M05Jan2012	0	0	0	0	0	0	0	0	0	0	0	0	0	0	0	0	0	0	0	0	0	0	0	0	0	0	0	0
M06Jan2012	2012	Jan	M06	1	Estuarine	3	3	3.6	1.6	15.7	8.33	25.3	8.24	15.6	8.27	27.5	8.26	0	11.9	209.514	M06Jan2012	0	0	0	0	0	0	0	0	0	0	0	0	0	0	0	0	0	0	0	0	0	0	0	0	0	0	0	0
M06Jan2012	2012	Jan	M06	2	Estuarine	3	3	3.6	1.6	15.7	8.33	25.3	8.24	15.6	8.27	27.5	8.26	0	11.9	209.514	M06Jan2012	0	0	0	0	0	0	0	0	0	0	0	0	0	0	0	0	0	0	0	0	0	0	0	0	0	0	0	0
M06Jan2012	2012	Jan	M06	3	Estuarine	3	3	3.6	1.6	15.7	8.33	25.3	8.24	15.6	8.27	27.5	8.26	0	11.9	209.514	M06Jan2012	0	0	0	0	0	0	0	0	0	0	0	0	0	0	0	0	0	0	0	0	0	0	0	0	0	0	0	0
M07Jan2012	2012	Jan	M07	1	Saline	3	2	3.9	1.5	17.6	7.94	29.6	8.29	17.8	7.77	30.4	8.3	0	18.1	85.2171	M07Jan2012	0	1	0	0	0	0	0	0	0	0	1	0	0	0	0	0	0	0	0	0	0	0	0	0	0	0	0	0
M07Jan2012	2012	Jan	M07	2	Saline	3	2	3.9	1.5	17.6	7.94	29.6	8.29	17.8	7.77	30.4	8.3	0	18.1	85.2171	M07Jan2012	0	0	0	0	0	0	0	0	0	0	0	0	0	0	0	0	0	0	0	0	0	0	0	0	0	0	0	0
M07Jan2012	2012	Jan	M07	3	Saline	3	2	3.9	1.5	17.6	7.94	29.6	8.29	17.8	7.77	30.4	8.3	0	18.1	85.2171	M07Jan2012	0	1	0	0	0	0	0	0	0	0	0	0	0	0	0	0	0	0	0	0	0	0	0	0	0	0	0	0
M09Jan2012	2012	Jan	M09	1	Saline	3	1.4	3.6	1.2	15.5	8.79	31	8.3	17.3	7.38	33.1	8.32	0	17.5	178.814	M09Jan2012	0	0	0	0	0	0	2	0	0	0	0	0	0	0	0	0	0	0	0	0	0	0	0	0	0	0	0	0
M09Jan2012	2012	Jan	M09	2	Saline	3	1.4	3.6	1.2	15.5	8.79	31	8.3	17.3	7.38	33.1	8.32	0	17.5	178.814	M09Jan2012	0	0	0	0	0	0	0	0	0	0	0	0	0	0	0	0	0	0	0	0	0	0	0	0	0	0	0	0
M09Jan2012	2012	Jan	M09	3	Saline	3	1.4	3.6	1.2	15.5	8.79	31	8.3	17.3	7.38	33.1	8.32	0	17.5	178.814	M09Jan2012	0	0	0	0	0	0	0	0	0	0	0	0	0	0	0	0	0	0	0	0	0	0	0	0	0	0	0	0
M10Jan2012	2012	Jan	M10	1	Saline	3	1.6	8.5	1.1	12.7	8.94	30.7	8.26	12.9	8.65	31.2	8.26	0	7.3	80.7917	M10Jan2012	0	0	0	0	0	0	4	0	0	0	1	0	0	0	0	0	0	0	0	0	0	0	0	0	0	0	0	0
M10Jan2012	2012	Jan	M10	2	Saline	3	1.6	8.5	1.1	12.7	8.94	30.7	8.26	12.9	8.65	31.2	8.26	0	7.3	80.7917	M10Jan2012	0	0	0	0	0	0	1	0	0	0	0	0	0	0	0	0	0	0	0	0	0	0	0	0	0	0	0	0
M10Jan2012	2012	Jan	M10	3	Saline	3	1.6	8.5	1.1	12.7	8.94	30.7	8.26	12.9	8.65	31.2	8.26	0	7.3	80.7917	M10Jan2012	0	0	0	0	0	0	7	0	0	0	5	0	0	0	0	0	0	0	0	0	0	0	0	0	0	0	0	0
M11Jan2012	2012	Jan	M11	1	Saline	3	1.4	3.6	1.8	13.9	7.88	31.3	8.16	13.9	8.06	31.3	8.22	0	8.1	79.315	M11Jan2012	0	0	0	0	0	0	1	0	0	0	0	0	0	0	0	0	0	0	0	0	0	0	0	0	0	0	0	0
M11Jan2012	2012	Jan	M11	2	Saline	3	1.4	3.6	1.8	13.9	7.88	31.3	8.16	13.9	8.06	31.3	8.22	0	8.1	79.315	M11Jan2012	0	0	0	0	0	0	2	0	0	0	0	0	0	0	0	0	0	0	0	0	0	0	0	0	0	0	0	0
M11Jan2012	2012	Jan	M11	3	Saline	3	1.4	3.6	1.8	13.9	7.88	31.3	8.16	13.9	8.06	31.3	8.22	0	8.1	79.315	M11Jan2012	0	0	0	0	0	0	0	0	0	0	0	0	0	0	0	0	0	0	0	0	0	0	0	0	0	0	0	0
M12Jan2012	2012	Jan	M12	1	Saline	3	1.4	5.1	1.4	17	7.55	33.3	8.24	17.1	7.65	33.5	8.31	0	12.9	165.017	M12Jan2012	0	0	0	0	0	0	0	0	0	0	1	0	0	0	0	0	0	0	0	0	0	0	0	0	0	0	0	0
M12Jan2012	2012	Jan	M12	2	Saline	3	1.4	5.1	1.4	17	7.55	33.3	8.24	17.1	7.65	33.5	8.31	0	12.9	165.017	M12Jan2012	0	0	0	0	0	0	0	0	0	0	0	0	0	0	0	0	0	0	0	0	0	0	0	0	0	0	0	0
M12Jan2012	2012	Jan	M12	3	Saline	3	1.4	5.1	1.4	17	7.55	33.3	8.24	17.1	7.65	33.5	8.31	0	12.9	165.017	M12Jan2012	0	0	0	0	0	0	0	0	0	0	0	0	0	0	0	0	0	0	0	0	0	0	0	0	0	0	0	0
M13Jan2012	2012	Jan	M13	1	Saline	3	1.4	4.2	1.4	14	8.62	29.2	8.2	15.6	8.02	31.6	8.25	0	11.2	183.167	M13Jan2012	0	0	0	0	0	0	0	0	0	0	0	0	0	0	0	0	0	0	0	0	0	0	0	0	0	0	0	0
M13Jan2012	2012	Jan	M13	2	Saline	3	1.4	4.2	1.4	14	8.62	29.2	8.2	15.6	8.02	31.6	8.25	0	11.2	183.167	M13Jan2012	0	0	0	0	0	0	0	0	0	0	0	0	0	0	0	0	0	0	0	0	0	0	0	0	0	0	0	0
M13Jan2012	2012	Jan	M13	3	Saline	3	1.4	4.2	1.4	14	8.62	29.2	8.2	15.6	8.02	31.6	8.25	0	11.2	183.167	M13Jan2012	0	0	0	0	0	0	0	0	0	0	1	0	0	0	0	0	0	0	0	0	0	0	0	0	0	0	0	0
M14Jan2012	2012	Jan	M14	1	Estuarine	3	2	3.6	1.3	15.1	8.96	4.1	8.1	15.4	8.43	10	8.14	0	17	91.1083	M14Jan2012	0	0	0	0	0	0	0	0	0	0	0	0	0	0	0	0	0	0	0	0	0	0	0	0	0	0	0	0
M14Jan2012	2012	Jan	M14	2	Estuarine	3	2	3.6	1.3	15.1	8.96	4.1	8.1	15.4	8.43	10	8.14	0	17	91.1083	M14Jan2012	0	0	0	0	0	0	0	0	0	0	0	0	0	0	0	0	0	0	0	0	0	0	0	0	0	0	0	0
M14Jan2012	2012	Jan	M14	3	Estuarine	3	2	3.6	1.3	15.1	8.96	4.1	8.1	15.4	8.43	10	8.14	0	17	91.1083	M14Jan2012	0	0	0	0	0	0	0	0	0	0	0	0	0	0	0	0	0	0	0	0	0	0	0	0	0	0	0	0
M15Jan2012	2012	Jan	M15	1	Fresh	3	2	4.9	1.4	14.9	8.77	0.7	8.1	14	7.82	0.7	7.94	0	17.9	111.3	M15Jan2012	0	0	0	0	0	0	0	0	0	0	0	0	0	0	0	0	0	0	0	0	0	0	0	0	0	0	0	0
M15Jan2012	2012	Jan	M15	2	Fresh	3	2	4.9	1.4	14.9	8.77	0.7	8.1	14	7.82	0.7	7.94	0	17.9	111.3	M15Jan2012	0	0	0	0	0	0	0	0	0	0	0	0	0	0	0	0	0	0	0	0	0	0	0	0	0	0	0	0
M15Jan2012	2012	Jan	M15	3	Fresh	3	2	4.9	1.4	14.9	8.77	0.7	8.1	14	7.82	0.7	7.94	0	17.9	111.3	M15Jan2012	0	0	0	0	0	0	0	0	0	0	0	0	0	0	0	0	0	0	0	0	0	0	0	0	0	0	0	0
M01Apr2012	2012	Apr	M01	1	Fresh	3	1.8	7	0.8	27.1	7.01	1.5	8.1	27.3	6.94	1.7	8.04	1	30.5	114	M01Apr2012	0	0	0	0	0	0	0	0	0	0	0	0	0	0	0	0	0	0	0	0	0	0	0	0	0	0	0	0
M01Apr2012	2012	Apr	M01	2	Fresh	3	1.8	7	0.8	27.1	7.01	1.5	8.1	27.3	6.94	1.7	8.04	1	30.5	114	M01Apr2012	0	0	0	0	0	0	0	0	0	0	0	0	0	0	0	0	0	0	0	0	0	0	0	0	0	0	0	0
M01Apr2012	2012	Apr	M01	3	Fresh	3	1.8	7	0.8	27.1	7.01	1.5	8.1	27.3	6.94	1.7	8.04	1	30.5	114	M01Apr2012	0	0	0	0	0	0	0	0	0	0	0	0	0	0	0	0	0	0	0	0	0	0	0	0	0	0	0	0
M02Apr2012	2012	Apr	M02	1	Estuarine	3	2	3.7	1.5	27.4	5.76	12.4	8.03	27.1	5.03	12.7	8.01	1	28.2	192.6	M02Apr2012	0	0	0	0	0	0	0	0	0	0	0	0	0	0	0	0	0	0	0	0	0	0	0	0	0	0	0	0
M02Apr2012	2012	Apr	M02	2	Estuarine	3	2	3.7	1.5	27.4	5.76	12.4	8.03	27.1	5.03	12.7	8.01	1	28.2	192.6	M02Apr2012	0	0	0	0	0	0	0	0	0	0	0	0	0	0	0	0	0	0	0	0	0	0	0	0	0	0	0	0
M02Apr2012	2012	Apr	M02	3	Estuarine	3	2	3.7	1.5	27.4	5.76	12.4	8.03	27.1	5.03	12.7	8.01	1	28.2	192.6	M02Apr2012	0	0	0	0	0	0	0	0	0	0	0	0	0	0	0	0	0	0	0	0	0	0	0	0	0	0	6	0
M03Apr2012	2012	Apr	M03	1	Estuarine	3	3	2.2	1.8	25.5	6.52	16.4	8.2	25.9	4.72	20.4	8.12	1	23.5	274.057	M03Apr2012	0	0	0	0	0	0	0	0	0	0	0	0	0	0	0	0	0	0	0	0	0	0	0	0	0	0	0	0
M03Apr2012	2012	Apr	M03	2	Estuarine	3	3	2.2	1.8	25.5	6.52	16.4	8.2	25.9	4.72	20.4	8.12	1	23.5	274.057	M03Apr2012	0	0	0	0	0	0	0	0	0	0	0	0	0	0	0	0	0	0	0	0	0	0	0	0	0	0	0	0
M03Apr2012	2012	Apr	M03	3	Estuarine	3	3	2.2	1.8	25.5	6.52	16.4	8.2	25.9	4.72	20.4	8.12	1	23.5	274.057	M03Apr2012	0	0	0	0	0	0	0	0	0	0	0	0	0	0	0	0	0	0	0	0	0	0	0	0	0	0	0	0
M04Apr2012	2012	Apr	M04	1	Estuarine	3	1.8	5.2	1.4	25.8	6.41	18.2	8.18	26.3	4.54	20.5	8.1	0	26.9	294.824	M04Apr2012	0	0	0	0	0	0	0	0	0	0	0	0	0	0	0	0	0	0	0	0	0	0	0	0	0	0	0	0
M04Apr2012	2012	Apr	M04	2	Estuarine	3	1.8	5.2	1.4	25.8	6.41	18.2	8.18	26.3	4.54	20.5	8.1	0	26.9	294.824	M04Apr2012	0	0	0	0	0	0	0	0	0	0	0	0	0	0	0	0	0	0	0	0	0	0	0	0	0	0	0	0
M04Apr2012	2012	Apr	M04	3	Estuarine	3	1.8	5.2	1.4	25.8	6.41	18.2	8.18	26.3	4.54	20.5	8.1	0	26.9	294.824	M04Apr2012	0	0	0	0	0	0	0	0	0	0	0	0	0	0	0	0	0	0	0	0	0	0	0	0	0	0	0	0
M05Apr2012	2012	Apr	M05	1	Estuarine	3	2.5	4.5	1.4	25.4	5.93	23	8.16	26	5.35	27.1	8.16	1	26.9	205.9	M05Apr2012	0	0	0	0	0	0	0	0	0	0	0	0	0	0	0	0	0	0	0	0	0	0	0	0	0	0	0	0
M05Apr2012	2012	Apr	M05	2	Estuarine	3	2.5	4.5	1.4	25.4	5.93	23	8.16	26	5.35	27.1	8.16	1	26.9	205.9	M05Apr2012	0	0	0	0	0	0	0	0	0	0	0	0	0	0	0	0	0	0	0	0	0	0	0	0	0	0	0	0
M05Apr2012	2012	Apr	M05	3	Estuarine	3	2.5	4.5	1.4	25.4	5.93	23	8.16	26	5.35	27.1	8.16	1	26.9	205.9	M05Apr2012	0	0	0	0	0	0	0	0	0	0	0	0	0	0	0	0	0	0	0	0	0	0	0	0	0	0	0	0
M06Apr2012	2012	Apr	M06	1	Estuarine	3	3	4.8	1.5	25.5	6.38	28.5	8.18	25.3	6.33	30.8	8.21	0	24.5	209.514	M06Apr2012	0	0	0	0	0	0	0	0	0	0	0	0	0	0	0	0	0	0	0	0	0	0	0	0	0	0	0	0
M06Apr2012	2012	Apr	M06	2	Estuarine	3	3	4.8	1.5	25.5	6.38	28.5	8.18	25.3	6.33	30.8	8.21	0	24.5	209.514	M06Apr2012	0	0	0	0	0	0	0	0	0	0	0	0	0	0	0	0	0	0	0	0	0	0	0	0	0	0	0	0
M06Apr2012	2012	Apr	M06	3	Estuarine	3	3	4.8	1.5	25.5	6.38	28.5	8.18	25.3	6.33	30.8	8.21	0	24.5	209.514	M06Apr2012	0	0	0	0	0	0	0	0	0	0	0	0	0	0	0	0	0	0	0	0	0	0	0	0	0	0	0	0
M07Apr2012	2012	Apr	M07	1	Saline	3	2.1	4.6	1.6	25.7	6.71	31.8	8.33	25.4	6.76	33	8.34	0	26.2	85.2171	M07Apr2012	0	1	0	0	0	0	0	0	0	0	0	0	0	0	0	0	0	0	0	0	0	0	0	0	0	0	0	0
M07Apr2012	2012	Apr	M07	2	Saline	3	2.1	4.6	1.6	25.7	6.71	31.8	8.33	25.4	6.76	33	8.34	0	26.2	85.2171	M07Apr2012	0	0	0	0	0	0	0	0	0	0	0	0	0	0	0	0	0	0	0	0	0	0	0	0	0	0	0	0
M07Apr2012	2012	Apr	M07	3	Saline	3	2.1	4.6	1.6	25.7	6.71	31.8	8.33	25.4	6.76	33	8.34	0	26.2	85.2171	M07Apr2012	0	0	0	0	0	0	0	0	0	0	0	0	0	0	0	0	0	0	0	0	0	0	0	0	0	0	0	0
M08Apr2012	2012	Apr	M08	1	Saline	3	1	5.2	1	27	6.8	33.4	8.32	26.8	6.73	33.7	8.31	0	27.1	108.817	M08Apr2012	0	0	0	0	0	0	0	0	0	0	0	0	0	0	0	0	0	0	0	0	0	0	0	0	0	0	0	0
M08Apr2012	2012	Apr	M08	2	Saline	3	1	5.2	1	27	6.8	33.4	8.32	26.8	6.73	33.7	8.31	0	27.1	108.817	M08Apr2012	1	0	0	0	0	0	0	0	0	0	0	0	0	0	0	0	0	0	0	0	0	0	0	0	0	0	0	0
M08Apr2012	2012	Apr	M08	3	Saline	3	1	5.2	1	27	6.8	33.4	8.32	26.8	6.73	33.7	8.31	0	27.1	108.817	M08Apr2012	0	0	0	0	0	0	0	0	0	0	0	0	0	0	0	0	0	0	0	0	0	0	0	0	0	0	0	0
M09Apr2012	2012	Apr	M09	1	Saline	3	1.4	4.6	1.4	26.2	6.69	34.2	8.42	26.1	6.63	34.2	8.42	0	24.6	178.814	M09Apr2012	1	0	0	0	0	0	0	0	0	0	0	0	0	0	0	1	0	0	0	0	0	0	0	0	0	0	0	0
M09Apr2012	2012	Apr	M09	2	Saline	3	1.4	4.6	1.4	26.2	6.69	34.2	8.42	26.1	6.63	34.2	8.42	0	24.6	178.814	M09Apr2012	0	0	0	0	1	0	0	0	0	0	0	0	0	0	0	0	0	0	0	0	0	0	0	0	0	0	0	0
M09Apr2012	2012	Apr	M09	3	Saline	3	1.4	4.6	1.4	26.2	6.69	34.2	8.42	26.1	6.63	34.2	8.42	0	24.6	178.814	M09Apr2012	1	0	0	0	0	0	0	0	0	0	0	0	0	0	0	0	0	0	0	0	0	0	0	0	0	0	0	0
M10Apr2012	2012	Apr	M10	1	Saline	3	1.6	4.6	1.6	25.7	6.38	35.1	8.33	25.7	6	35.1	8.34	0	20.9	80.7917	M10Apr2012	0	0	0	0	0	0	3	0	0	0	0	0	0	0	0	0	0	0	0	0	0	0	0	0	0	0	0	0
M10Apr2012	2012	Apr	M10	2	Saline	3	1.6	4.6	1.6	25.7	6.38	35.1	8.33	25.7	6	35.1	8.34	0	20.9	80.7917	M10Apr2012	0	0	0	0	0	0	1	0	0	0	0	0	0	0	0	0	0	0	0	0	0	0	0	0	0	0	0	0
M10Apr2012	2012	Apr	M10	3	Saline	3	1.6	4.6	1.6	25.7	6.38	35.1	8.33	25.7	6	35.1	8.34	0	20.9	80.7917	M10Apr2012	0	0	0	0	0	0	5	0	0	0	0	0	0	0	0	0	0	0	0	0	0	0	0	0	0	0	0	0
M11Apr2012	2012	Apr	M11	1	Saline	3	2.2	4.9	1.6	25.6	6.18	35.5	8.31	25.6	6.21	35.5	8.34	0	22.5	79.315	M11Apr2012	0	0	0	0	0	0	0	0	0	0	2	0	0	0	0	0	0	0	0	0	0	0	0	0	0	0	0	0
M11Apr2012	2012	Apr	M11	2	Saline	3	2.2	4.9	1.6	25.6	6.18	35.5	8.31	25.6	6.21	35.5	8.34	0	22.5	79.315	M11Apr2012	0	0	0	0	0	0	0	0	0	0	2	0	0	0	0	0	0	0	0	0	0	0	0	0	0	0	0	1
M11Apr2012	2012	Apr	M11	3	Saline	3	2.2	4.9	1.6	25.6	6.18	35.5	8.31	25.6	6.21	35.5	8.34	0	22.5	79.315	M11Apr2012	0	0	0	0	0	0	4	0	0	0	0	0	0	0	0	0	0	0	0	0	0	0	0	0	0	0	0	0
M12Apr2012	2012	Apr	M12	1	Saline	3	1.7	1.9	1.7	24.1	6.7	35	8.27	24.1	6.77	35	8.3	0	26.7	165.017	M12Apr2012	0	0	0	0	0	0	0	0	0	0	0	0	0	0	0	0	0	0	0	0	0	0	0	0	0	0	0	0
M12Apr2012	2012	Apr	M12	2	Saline	3	1.7	1.9	1.7	24.1	6.7	35	8.27	24.1	6.77	35	8.3	0	26.7	165.017	M12Apr2012	0	0	0	0	0	0	0	0	0	0	0	0	0	0	0	0	0	0	0	0	0	0	0	0	0	0	0	0
M12Apr2012	2012	Apr	M12	3	Saline	3	1.7	1.9	1.7	24.1	6.7	35	8.27	24.1	6.77	35	8.3	0	26.7	165.017	M12Apr2012	0	0	0	0	0	0	2	0	0	0	0	0	0	0	0	0	0	0	0	0	0	0	0	0	0	0	0	0
M13Apr2012	2012	Apr	M13	1	Saline	3	1.3	4.2	1.3	24.6	6.72	35.1	8.33	24.6	6.56	35.1	8.36	0	23.4	183.167	M13Apr2012	0	0	0	0	0	0	0	0	0	0	0	0	0	0	0	0	0	0	0	0	0	0	0	0	0	0	0	0
M13Apr2012	2012	Apr	M13	2	Saline	3	1.3	4.2	1.3	24.6	6.72	35.1	8.33	24.6	6.56	35.1	8.36	0	23.4	183.167	M13Apr2012	0	0	0	0	0	0	0	0	0	0	0	0	0	0	0	0	0	0	0	0	0	0	0	0	0	0	0	0
M13Apr2012	2012	Apr	M13	3	Saline	3	1.3	4.2	1.3	24.6	6.72	35.1	8.33	24.6	6.56	35.1	8.36	0	23.4	183.167	M13Apr2012	0	2	0	0	0	0	1	0	0	0	0	0	0	0	0	0	0	0	0	0	0	0	0	0	0	0	0	0
M14Apr2012	2012	Apr	M14	1	Estuarine	3	2.2	3.2	1.5	26	6.64	12	8.15	26.6	5.08	16.7	8.08	1	26.1	91.1083	M14Apr2012	0	0	0	0	0	0	0	0	0	0	0	0	0	0	0	0	0	0	0	0	0	0	0	0	0	0	0	0
M14Apr2012	2012	Apr	M14	2	Estuarine	3	2.2	3.2	1.5	26	6.64	12	8.15	26.6	5.08	16.7	8.08	1	26.1	91.1083	M14Apr2012	0	0	0	0	0	0	0	0	0	0	0	0	0	0	0	0	0	0	0	0	0	0	0	0	0	0	0	0
M14Apr2012	2012	Apr	M14	3	Estuarine	3	2.2	3.2	1.5	26	6.64	12	8.15	26.6	5.08	16.7	8.08	1	26.1	91.1083	M14Apr2012	0	0	0	0	0	0	0	0	0	0	0	0	0	0	0	0	0	0	0	0	0	0	0	0	0	0	0	0
M07Oct2012	2012	Oct	M07	1	Saline	3	1.9	6.95	1	28.4	5.16	26.42	8.13	28.4	5.13	32.33	8.3	0	27.4	85.2171	M07Oct2012	0	0	0	0	0	0	0	0	0	0	0	0	0	0	0	0	0	0	0	0	0	0	0	0	0	0	0	0
M07Oct2012	2012	Oct	M07	2	Saline	3	1.9	6.95	1	28.4	5.16	26.42	8.13	28.4	5.13	32.33	8.3	0	27.4	85.2171	M07Oct2012	0	0	0	0	0	0	0	0	0	0	0	0	0	0	0	0	0	0	0	0	0	0	0	0	0	0	0	0
M07Oct2012	2012	Oct	M07	3	Saline	3	1.9	6.95	1	28.4	5.16	26.42	8.13	28.4	5.13	32.33	8.3	0	27.4	85.2171	M07Oct2012	0	0	0	0	0	0	0	0	0	0	0	0	0	0	0	0	0	0	0	0	0	0	0	0	0	0	0	0
M08Oct2012	2012	Oct	M08	1	Saline	3	1.3	7.72	1	28.1	4.94	22.29	8.04	28.2	4.95	26.54	8.13	0	26.1	108.817	M08Oct2012	3	0	0	0	0	0	0	0	0	0	0	0	0	0	0	0	0	0	0	0	0	0	0	0	0	0	0	0
M08Oct2012	2012	Oct	M08	2	Saline	3	1.3	7.72	1	28.1	4.94	22.29	8.04	28.2	4.95	26.54	8.13	0	26.1	108.817	M08Oct2012	0	0	0	0	0	0	0	0	0	0	0	0	0	0	0	0	0	0	0	0	0	0	0	0	0	0	0	0
M08Oct2012	2012	Oct	M08	3	Saline	3	1.3	7.72	1	28.1	4.94	22.29	8.04	28.2	4.95	26.54	8.13	0	26.1	108.817	M08Oct2012	0	0	0	0	0	0	0	0	0	0	0	0	0	0	0	0	0	0	0	0	0	0	0	0	0	0	0	0
M09Oct2012	2012	Oct	M09	1	Saline	3	1.5	5.43	1	27.6	5.16	25.47	8.12	27.6	5.15	25.54	8.12	0	25.7	178.814	M09Oct2012	0	2	0	0	0	0	0	0	0	0	0	0	0	0	0	0	0	0	0	0	0	0	0	0	0	0	0	0
M09Oct2012	2012	Oct	M09	2	Saline	3	1.5	5.43	1	27.6	5.16	25.47	8.12	27.6	5.15	25.54	8.12	0	25.7	178.814	M09Oct2012	0	0	0	0	0	0	0	0	0	0	1	0	0	0	0	0	0	0	0	0	0	0	0	0	0	0	0	0
M09Oct2012	2012	Oct	M09	3	Saline	3	1.5	5.43	1	27.6	5.16	25.47	8.12	27.6	5.15	25.54	8.12	0	25.7	178.814	M09Oct2012	0	2	0	0	0	0	3	0	0	0	0	0	0	0	0	0	0	0	0	0	0	0	0	0	0	0	0	0
M01Jan2013	2013	Jan	M01	1	Fresh	3	1.6	8.27	1	22.7	6.64	1.14	7.93	22.7	6.6	1.14	7.91	0	24.8	114	M01Jan2013	0	0	0	0	0	0	0	0	0	0	0	0	0	0	0	0	0	0	0	0	0	0	0	0	0	0	0	0
M01Jan2013	2013	Jan	M01	2	Fresh	3	1.6	8.27	1	22.7	6.64	1.14	7.93	22.7	6.6	1.14	7.91	0	24.8	114	M01Jan2013	0	0	0	0	0	0	0	0	0	0	0	0	0	0	0	0	0	0	0	0	0	0	0	0	0	0	0	0
M01Jan2013	2013	Jan	M01	3	Fresh	3	1.6	8.27	1	22.7	6.64	1.14	7.93	22.7	6.6	1.14	7.91	0	24.8	114	M01Jan2013	0	0	0	0	0	0	0	0	0	0	0	0	0	0	0	0	0	0	0	0	0	0	0	0	0	0	0	0
M02Jan2013	2013	Jan	M02	1	Estuarine	3	1.6	5.19	1	22.9	5.33	11.98	7.82	22.6	5.13	13.09	7.83	1	26.1	192.6	M02Jan2013	0	0	0	0	0	0	0	0	0	0	0	0	0	0	0	0	0	0	0	0	0	0	0	0	0	0	0	0
M02Jan2013	2013	Jan	M02	2	Estuarine	3	1.6	5.19	1	22.9	5.33	11.98	7.82	22.6	5.13	13.09	7.83	1	26.1	192.6	M02Jan2013	0	0	0	0	0	0	0	0	0	0	0	0	0	0	0	0	0	0	0	0	0	0	0	0	0	0	0	0
M02Jan2013	2013	Jan	M02	3	Estuarine	3	1.6	5.19	1	22.9	5.33	11.98	7.82	22.6	5.13	13.09	7.83	1	26.1	192.6	M02Jan2013	0	0	0	0	0	0	0	0	0	0	0	0	0	0	0	0	0	0	0	0	0	0	0	0	0	0	0	0
M03Jan2013	2013	Jan	M03	1	Estuarine	3	3.2	4.22	1.5	22.8	6.14	18.57	8.1	22.8	5.16	18.23	8.02	0	25.4	274.057	M03Jan2013	0	0	0	0	0	0	0	0	0	0	0	0	0	0	0	0	0	0	0	0	0	0	0	0	0	0	0	0
M03Jan2013	2013	Jan	M03	2	Estuarine	3	3.2	4.22	1.5	22.8	6.14	18.57	8.1	22.8	5.16	18.23	8.02	0	25.4	274.057	M03Jan2013	0	0	0	0	0	0	0	0	0	0	0	0	0	0	0	0	0	0	0	0	0	0	0	0	0	0	0	0
M03Jan2013	2013	Jan	M03	3	Estuarine	3	3.2	4.22	1.5	22.8	6.14	18.57	8.1	22.8	5.16	18.23	8.02	0	25.4	274.057	M03Jan2013	0	0	0	0	0	0	0	0	0	0	0	0	0	0	0	0	0	0	0	0	0	0	0	0	0	0	0	0
M04Jan2013	2013	Jan	M04	1	Estuarine	3	2	5	1.2	23.3	6.26	16.84	8.06	23.1	4.89	19.62	7.96	1	24.6	294.824	M04Jan2013	0	0	0	0	0	0	0	0	0	0	0	0	0	0	0	0	0	0	0	0	0	0	0	0	0	0	0	0
M04Jan2013	2013	Jan	M04	2	Estuarine	3	2	5	1.2	23.3	6.26	16.84	8.06	23.1	4.89	19.62	7.96	1	24.6	294.824	M04Jan2013	0	0	0	0	0	0	0	0	0	0	0	0	0	0	0	0	0	0	0	0	0	0	0	0	0	0	0	0
M04Jan2013	2013	Jan	M04	3	Estuarine	3	2	5	1.2	23.3	6.26	16.84	8.06	23.1	4.89	19.62	7.96	1	24.6	294.824	M04Jan2013	0	0	0	0	0	0	0	0	0	0	0	0	0	0	0	0	0	0	0	0	0	0	0	0	0	0	0	0
M06Jan2013	2013	Jan	M06	1	Estuarine	3	3.2	5.36	1.4	23.2	6.09	26.96	8.2	23.1	5.83	31.88	8.25	0	24.2	209.514	M06Jan2013	0	0	0	0	0	0	0	0	0	0	0	0	0	0	0	0	0	0	0	0	0	0	0	0	0	0	0	0
M06Jan2013	2013	Jan	M06	2	Estuarine	3	3.2	5.36	1.4	23.2	6.09	26.96	8.2	23.1	5.83	31.88	8.25	0	24.2	209.514	M06Jan2013	0	0	0	0	0	0	0	0	0	0	0	0	0	0	0	0	0	0	0	0	0	0	0	0	0	0	0	0
M06Jan2013	2013	Jan	M06	3	Estuarine	3	3.2	5.36	1.4	23.2	6.09	26.96	8.2	23.1	5.83	31.88	8.25	0	24.2	209.514	M06Jan2013	0	0	0	0	0	0	1	0	0	0	0	0	0	0	0	0	0	0	0	0	0	0	0	0	0	0	0	0
M07Jan2013	2013	Jan	M07	1	Saline	3	2	5.04	1.7	22.7	5.89	33.33	8.31	22.9	5.31	35.36	8.34	0	21.7	85.2171	M07Jan2013	0	2	0	0	0	0	0	0	0	0	0	0	0	0	0	0	0	0	0	0	0	0	0	0	0	0	0	0
M07Jan2013	2013	Jan	M07	2	Saline	3	2	5.04	1.7	22.7	5.89	33.33	8.31	22.9	5.31	35.36	8.34	0	21.7	85.2171	M07Jan2013	0	1	0	0	0	0	0	0	0	0	0	0	0	0	0	0	0	0	0	0	0	0	0	0	0	0	0	0
M07Jan2013	2013	Jan	M07	3	Saline	3	2	5.04	1.7	22.7	5.89	33.33	8.31	22.9	5.31	35.36	8.34	0	21.7	85.2171	M07Jan2013	0	2	0	0	0	0	0	0	0	0	0	0	0	0	0	2	0	0	0	0	0	0	0	0	0	0	0	0
M08Jan2013	2013	Jan	M08	1	Saline	3	1.1	7	1.1	22.6	5.41	32.18	8.24	22.6	5.53	32.13	8.24	0	21.9	108.817	M08Jan2013	0	0	0	0	0	0	5	0	0	0	1	0	0	0	0	1	0	0	0	0	0	0	0	0	0	0	0	0
M08Jan2013	2013	Jan	M08	2	Saline	3	1.1	7	1.1	22.6	5.41	32.18	8.24	22.6	5.53	32.13	8.24	0	21.9	108.817	M08Jan2013	0	1	0	0	0	0	1	0	0	0	0	0	0	0	0	0	0	0	0	0	0	0	0	0	0	0	0	0
M08Jan2013	2013	Jan	M08	3	Saline	3	1.1	7	1.1	22.6	5.41	32.18	8.24	22.6	5.53	32.13	8.24	0	21.9	108.817	M08Jan2013	0	2	0	0	0	0	0	0	0	0	1	0	0	0	0	0	0	0	0	0	0	0	0	0	0	0	0	0
M09Jan2013	2013	Jan	M09	1	Saline	3	1.6	8.55	1.2	22.5	5.76	34.36	8.27	22.5	5.14	34.34	8.26	0	21	178.814	M09Jan2013	0	5	0	0	0	0	0	0	0	0	1	0	0	0	0	0	0	0	0	0	0	0	0	0	0	0	0	0
M09Jan2013	2013	Jan	M09	2	Saline	3	1.6	8.55	1.2	22.5	5.76	34.36	8.27	22.5	5.14	34.34	8.26	0	21	178.814	M09Jan2013	0	0	0	0	0	0	1	0	0	0	1	0	0	0	0	0	0	0	0	0	0	0	0	0	0	0	0	0
M09Jan2013	2013	Jan	M09	3	Saline	3	1.6	8.55	1.2	22.5	5.76	34.36	8.27	22.5	5.14	34.34	8.26	0	21	178.814	M09Jan2013	0	2	0	0	0	0	0	0	0	0	0	0	0	0	0	0	0	0	0	0	0	0	0	0	0	0	0	0
M10Jan2013	2013	Jan	M10	1	Saline	3	1.9	6.37	1.5	22.5	5.74	34.41	8.25	22.6	5.75	34.42	8.26	0	23.9	80.7917	M10Jan2013	0	1	0	0	0	0	0	0	0	0	0	0	0	0	0	0	0	0	0	0	0	0	0	0	0	0	0	1
M10Jan2013	2013	Jan	M10	2	Saline	3	1.9	6.37	1.5	22.5	5.74	34.41	8.25	22.6	5.75	34.42	8.26	0	23.9	80.7917	M10Jan2013	0	0	0	0	0	0	3	0	0	0	0	0	0	0	0	0	0	0	0	0	0	0	0	0	0	0	0	0
M10Jan2013	2013	Jan	M10	3	Saline	3	1.9	6.37	1.5	22.5	5.74	34.41	8.25	22.6	5.75	34.42	8.26	0	23.9	80.7917	M10Jan2013	0	0	0	0	0	0	0	0	0	0	0	0	0	0	0	0	0	0	0	0	0	0	0	0	0	0	0	0
M11Jan2013	2013	Jan	M11	1	Saline	3	2.4	7.25	1.5	22.5	5.92	34.79	8.34	22.5	5.98	34.8	8.34	0	23.9	79.315	M11Jan2013	0	0	0	0	0	0	0	0	0	0	0	0	0	0	0	0	0	0	0	0	0	0	0	0	0	0	0	0
M11Jan2013	2013	Jan	M11	2	Saline	3	2.4	7.25	1.5	22.5	5.92	34.79	8.34	22.5	5.98	34.8	8.34	0	23.9	79.315	M11Jan2013	0	0	0	0	0	0	0	0	0	0	1	0	0	0	0	1	0	0	0	0	0	0	0	0	0	0	0	0
M11Jan2013	2013	Jan	M11	3	Saline	3	2.4	7.25	1.5	22.5	5.92	34.79	8.34	22.5	5.98	34.8	8.34	0	23.9	79.315	M11Jan2013	0	0	0	0	0	0	0	0	0	0	0	0	0	0	0	0	0	0	0	0	0	0	0	0	0	0	0	0
M12Jan2013	2013	Jan	M12	1	Saline	3	1.6	2.77	1.6	21.8	6.49	35.69	8.37	21.8	6.54	35.7	8.37	0	23.9	165.017	M12Jan2013	0	0	0	0	0	0	1	0	0	0	0	0	0	0	0	0	0	0	0	0	0	0	0	0	0	0	0	0
M12Jan2013	2013	Jan	M12	2	Saline	3	1.6	2.77	1.6	21.8	6.49	35.69	8.37	21.8	6.54	35.7	8.37	0	23.9	165.017	M12Jan2013	0	0	0	0	0	0	5	0	0	0	1	0	0	0	0	0	0	0	0	0	0	0	0	0	0	0	0	0
M12Jan2013	2013	Jan	M12	3	Saline	3	1.6	2.77	1.6	21.8	6.49	35.69	8.37	21.8	6.54	35.7	8.37	0	23.9	165.017	M12Jan2013	0	0	0	0	0	0	0	0	0	0	2	0	0	0	0	0	0	0	0	0	0	0	0	0	0	0	0	0
M13Jan2013	2013	Jan	M13	1	Saline	3	1.3	6.35	1.3	2.1	6.36	34.83	8.36	21.1	6.52	35.01	8.36	0	24.2	183.167	M13Jan2013	0	1	0	0	0	0	0	0	0	0	0	0	0	0	0	6	0	0	0	2	0	0	0	0	0	0	0	0
M13Jan2013	2013	Jan	M13	2	Saline	3	1.3	6.35	1.3	2.1	6.36	34.83	8.36	21.1	6.52	35.01	8.36	0	24.2	183.167	M13Jan2013	0	0	0	0	0	0	1	0	0	0	0	0	0	0	0	3	0	0	0	1	0	0	0	0	0	0	0	0
M13Jan2013	2013	Jan	M13	3	Saline	3	1.3	6.35	1.3	2.1	6.36	34.83	8.36	21.1	6.52	35.01	8.36	0	24.2	183.167	M13Jan2013	0	0	0	0	0	0	0	0	0	0	0	0	0	0	0	0	0	0	0	1	0	0	0	0	0	1	0	0
M14Jan2013	2013	Jan	M14	1	Estuarine	3	2.1	4.77	1.2	23	5.87	6.92	7.94	23	4.64	15.27	7.87	1	25.4	91.1083	M14Jan2013	0	0	0	0	0	0	0	0	0	0	0	0	0	0	0	0	0	0	0	0	0	0	0	0	0	0	0	0
M14Jan2013	2013	Jan	M14	2	Estuarine	3	2.1	4.77	1.2	23	5.87	6.92	7.94	23	4.64	15.27	7.87	1	25.4	91.1083	M14Jan2013	0	0	0	0	0	0	0	0	0	0	0	0	0	0	0	0	0	0	0	0	0	0	0	0	0	0	0	0
M14Jan2013	2013	Jan	M14	3	Estuarine	3	2.1	4.77	1.2	23	5.87	6.92	7.94	23	4.64	15.27	7.87	1	25.4	91.1083	M14Jan2013	0	0	0	0	0	0	0	0	0	0	0	0	0	0	0	0	0	0	0	0	0	0	0	0	0	0	0	0
M15Jan2013	2013	Jan	M15	1	Fresh	3	2	6.86	1	23	5.64	0.95	7.85	22.1	4.25	0.99	7.71	1	25.3	111.3	M15Jan2013	0	0	0	0	0	0	0	0	0	0	0	0	0	0	0	0	0	0	0	0	0	0	0	0	0	0	0	0
M15Jan2013	2013	Jan	M15	2	Fresh	3	2	6.86	1	23	5.64	0.95	7.85	22.1	4.25	0.99	7.71	1	25.3	111.3	M15Jan2013	0	0	0	0	0	0	0	0	0	0	0	0	0	0	0	0	0	0	0	0	0	0	0	0	0	0	0	0
M15Jan2013	2013	Jan	M15	3	Fresh	3	2	6.86	1	23	5.64	0.95	7.85	22.1	4.25	0.99	7.71	1	25.3	111.3	M15Jan2013	0	0	0	0	0	0	0	0	0	0	0	0	0	0	0	0	0	0	0	0	0	0	0	0	0	0	0	0
M01Apr2013	2013	Apr	M01	1	Fresh	3	1.6	6.88	1	24.5	7.1	3.34	8.19	24.6	7.4	3.47	8.18	1	26.7	114	M01Apr2013	0	0	0	0	0	0	0	0	0	0	0	0	0	0	0	0	0	0	0	0	0	0	0	0	0	0	0	0
M01Apr2013	2013	Apr	M01	2	Fresh	3	1.6	6.88	1	24.5	7.1	3.34	8.19	24.6	7.4	3.47	8.18	1	26.7	114	M01Apr2013	0	0	0	0	0	0	0	0	0	0	0	0	0	0	0	0	0	0	0	0	0	0	0	0	0	0	0	0
M01Apr2013	2013	Apr	M01	3	Fresh	3	1.6	6.88	1	24.5	7.1	3.34	8.19	24.6	7.4	3.47	8.18	1	26.7	114	M01Apr2013	0	0	0	0	0	0	0	0	0	0	0	0	0	0	0	0	0	0	0	0	0	0	0	0	0	0	0	0
M02Apr2013	2013	Apr	M02	1	Estuarine	3	1.7	3.7	1.3	24.4	6.16	14.53	8.01	24	5.87	15.31	7.98	1	27.4	192.6	M02Apr2013	0	0	0	0	0	0	0	0	0	0	0	0	0	0	0	0	0	0	0	0	0	0	0	0	0	0	0	0
M02Apr2013	2013	Apr	M02	2	Estuarine	3	1.7	3.7	1.3	24.4	6.16	14.53	8.01	24	5.87	15.31	7.98	1	27.4	192.6	M02Apr2013	0	0	0	0	0	0	0	0	0	0	0	0	0	0	0	0	0	0	0	0	0	0	0	0	0	0	0	0
M02Apr2013	2013	Apr	M02	3	Estuarine	3	1.7	3.7	1.3	24.4	6.16	14.53	8.01	24	5.87	15.31	7.98	1	27.4	192.6	M02Apr2013	0	0	0	0	0	0	0	0	0	0	0	0	0	0	0	0	0	0	0	0	0	0	0	0	0	0	0	0
M03Apr2013	2013	Apr	M03	1	Estuarine	3	2.7	2.83	1.7	22.5	6.45	22.96	8.23	22.4	5.6	25.37	8.2	0	21.8	274.057	M03Apr2013	0	0	0	0	0	0	0	0	0	0	0	0	0	0	0	0	0	0	0	0	0	0	0	0	0	0	0	0
M03Apr2013	2013	Apr	M03	2	Estuarine	3	2.7	2.83	1.7	22.5	6.45	22.96	8.23	22.4	5.6	25.37	8.2	0	21.8	274.057	M03Apr2013	0	0	0	0	0	0	0	0	0	0	0	0	0	0	0	0	0	0	0	0	0	0	0	0	0	0	0	0
M03Apr2013	2013	Apr	M03	3	Estuarine	3	2.7	2.83	1.7	22.5	6.45	22.96	8.23	22.4	5.6	25.37	8.2	0	21.8	274.057	M03Apr2013	0	0	0	0	0	0	0	0	0	0	0	0	0	0	0	0	0	0	0	0	0	0	0	0	0	0	0	0
M04Apr2013	2013	Apr	M04	1	Estuarine	3	1.6	5.32	1.2	23.5	6.06	21.23	8.13	22.8	5.2	24.48	8.1	0	23.1	294.824	M04Apr2013	0	0	0	0	0	0	0	0	0	0	0	0	0	0	0	0	0	0	0	0	0	0	0	0	0	0	0	0
M04Apr2013	2013	Apr	M04	2	Estuarine	3	1.6	5.32	1.2	23.5	6.06	21.23	8.13	22.8	5.2	24.48	8.1	0	23.1	294.824	M04Apr2013	0	0	0	0	0	0	0	0	0	0	0	0	0	0	0	0	0	0	0	0	0	0	0	0	0	0	0	0
M04Apr2013	2013	Apr	M04	3	Estuarine	3	1.6	5.32	1.2	23.5	6.06	21.23	8.13	22.8	5.2	24.48	8.1	0	23.1	294.824	M04Apr2013	0	0	0	0	0	0	0	0	0	0	0	0	0	0	0	0	0	0	0	0	0	0	0	0	0	0	0	0
M06Apr2013	2013	Apr	M06	1	Estuarine	3	2.7	3.38	1.8	21.9	6.09	29.22	8.29	22.6	6	33.25	8.35	0	19.9	209.514	M06Apr2013	0	0	0	0	0	0	0	0	0	0	0	0	0	0	0	0	0	0	0	0	0	0	0	0	0	0	0	0
M06Apr2013	2013	Apr	M06	2	Estuarine	3	2.7	3.38	1.8	21.9	6.09	29.22	8.29	22.6	6	33.25	8.35	0	19.9	209.514	M06Apr2013	0	0	0	0	0	0	0	0	0	0	0	0	0	0	0	0	0	0	0	0	0	0	0	0	0	0	0	0
M06Apr2013	2013	Apr	M06	3	Estuarine	3	2.7	3.38	1.8	21.9	6.09	29.22	8.29	22.6	6	33.25	8.35	0	19.9	209.514	M06Apr2013	0	0	0	0	0	0	0	0	0	0	0	0	0	0	0	0	0	0	0	0	0	0	0	0	0	0	0	0
M07Apr2013	2013	Apr	M07	1	Saline	3	2.3	4.66	1.7	23.4	6.43	34.46	8.39	23.3	6.42	34.66	8.39	0	22.7	85.2171	M07Apr2013	0	0	0	0	0	0	0	0	0	0	1	0	0	0	0	0	0	0	0	0	0	0	0	0	0	0	0	0
M07Apr2013	2013	Apr	M07	2	Saline	3	2.3	4.66	1.7	23.4	6.43	34.46	8.39	23.3	6.42	34.66	8.39	0	22.7	85.2171	M07Apr2013	0	0	0	0	0	0	2	0	0	0	0	0	0	0	0	0	0	0	0	0	0	0	0	0	0	0	0	0
M07Apr2013	2013	Apr	M07	3	Saline	3	2.3	4.66	1.7	23.4	6.43	34.46	8.39	23.3	6.42	34.66	8.39	0	22.7	85.2171	M07Apr2013	0	0	0	0	0	0	0	0	0	0	0	0	0	0	0	0	0	0	0	0	0	0	0	0	0	0	0	0
M08Apr2013	2013	Apr	M08	1	Saline	3	1	7.03	1	23.5	6.45	34.49	8.37	23.5	6.45	34.5	8.37	0	23.8	108.817	M08Apr2013	0	0	0	0	0	0	0	0	0	0	0	0	0	0	0	0	0	0	0	0	0	0	0	0	0	0	0	0
M08Apr2013	2013	Apr	M08	2	Saline	3	1	7.03	1	23.5	6.45	34.49	8.37	23.5	6.45	34.5	8.37	0	23.8	108.817	M08Apr2013	0	0	0	0	0	0	1	0	0	0	1	0	0	0	0	0	0	0	0	0	0	0	0	0	0	0	0	0
M08Apr2013	2013	Apr	M08	3	Saline	3	1	7.03	1	23.5	6.45	34.49	8.37	23.5	6.45	34.5	8.37	0	23.8	108.817	M08Apr2013	0	0	0	0	0	0	0	0	0	0	0	0	0	0	0	0	0	0	0	0	0	0	0	0	0	0	0	0
M02Jul2013	2013	Jul	M02	1	Estuarine	3	2.1	10.1	0.6	30.5	4.34	0.53	7.78	30.4	4.29	0.53	7.76	1	27.4	192.6	M02Jul2013	0	0	0	0	0	0	0	0	0	0	0	0	0	0	0	0	0	0	0	0	0	0	0	0	0	0	0	0
M02Jul2013	2013	Jul	M02	2	Estuarine	3	2.1	10.1	0.6	30.5	4.34	0.53	7.78	30.4	4.29	0.53	7.76	1	27.4	192.6	M02Jul2013	0	0	0	0	0	0	0	0	0	0	0	0	0	0	0	0	0	0	0	0	0	0	0	0	0	0	0	0
M02Jul2013	2013	Jul	M02	3	Estuarine	3	2.1	10.1	0.6	30.5	4.34	0.53	7.78	30.4	4.29	0.53	7.76	1	27.4	192.6	M02Jul2013	0	0	0	0	0	0	0	0	0	0	0	0	0	0	0	0	0	0	0	0	0	0	0	0	0	0	0	0
M03Jul2013	2013	Jul	M03	1	Estuarine	3	3	21.6	0.5	29.5	6.06	0.62	8.44	29.1	5.65	0.61	8.35	1	26.6	274.057	M03Jul2013	0	0	0	0	0	0	0	0	0	0	0	0	0	0	0	0	0	0	0	0	0	0	0	0	0	0	0	0
M03Jul2013	2013	Jul	M03	2	Estuarine	3	3	21.6	0.5	29.5	6.06	0.62	8.44	29.1	5.65	0.61	8.35	1	26.6	274.057	M03Jul2013	0	0	0	0	0	0	0	0	0	0	0	0	0	0	0	0	0	0	0	0	0	0	0	0	0	0	0	0
M03Jul2013	2013	Jul	M03	3	Estuarine	3	3	21.6	0.5	29.5	6.06	0.62	8.44	29.1	5.65	0.61	8.35	1	26.6	274.057	M03Jul2013	0	0	0	0	0	0	0	0	0	0	0	0	0	0	0	0	0	0	0	0	0	0	0	0	0	0	0	0
M04Jul2013	2013	Jul	M04	1	Estuarine	3	1.7	22.5	0.5	29.1	6.1	0.26	8.1	29	5.84	0.26	8.07	1	26.3	294.824	M04Jul2013	0	0	0	0	0	0	0	0	0	0	0	0	0	0	0	0	0	0	0	0	0	0	0	0	0	0	0	0
M04Jul2013	2013	Jul	M04	2	Estuarine	3	1.7	22.5	0.5	29.1	6.1	0.26	8.1	29	5.84	0.26	8.07	1	26.3	294.824	M04Jul2013	0	0	0	0	0	0	0	0	0	0	0	0	0	0	0	0	0	0	0	0	0	0	0	0	0	0	0	0
M04Jul2013	2013	Jul	M04	3	Estuarine	3	1.7	22.5	0.5	29.1	6.1	0.26	8.1	29	5.84	0.26	8.07	1	26.3	294.824	M04Jul2013	0	0	0	0	0	0	0	0	0	0	0	0	0	0	0	0	0	0	0	0	0	0	0	0	0	0	0	0
M06Jul2013	2013	Jul	M06	1	Estuarine	3	2.6	15.7	0.6	29.4	5.69	1.74	8.41	28.1	4.86	26.77	8.42	0	24.7	209.514	M06Jul2013	0	0	0	0	0	0	0	0	0	0	0	0	0	0	0	0	0	0	0	2	0	0	0	0	0	0	0	0
M06Jul2013	2013	Jul	M06	2	Estuarine	3	2.6	15.7	0.6	29.4	5.69	1.74	8.41	28.1	4.86	26.77	8.42	0	24.7	209.514	M06Jul2013	0	0	0	0	0	0	0	0	0	0	0	0	0	0	0	0	0	0	0	1	0	0	0	0	0	0	0	0
M06Jul2013	2013	Jul	M06	3	Estuarine	3	2.6	15.7	0.6	29.4	5.69	1.74	8.41	28.1	4.86	26.77	8.42	0	24.7	209.514	M06Jul2013	0	0	0	0	0	0	0	0	0	0	0	0	0	0	0	0	0	0	0	0	0	0	0	0	0	0	0	0
M07Jul2013	2013	Jul	M07	1	Saline	3	2	11.2	1	28.9	6.12	10.49	8.53	28.1	6	23.03	8.47	1	25.3	85.2171	M07Jul2013	0	0	0	0	0	0	0	0	0	0	0	0	0	0	0	2	0	0	0	3	0	0	0	0	0	0	0	0
M07Jul2013	2013	Jul	M07	2	Saline	3	2	11.2	1	28.9	6.12	10.49	8.53	28.1	6	23.03	8.47	1	25.3	85.2171	M07Jul2013	0	0	0	0	0	0	5	0	0	0	1	0	0	0	0	3	0	0	0	7	0	0	0	0	0	0	0	0
M07Jul2013	2013	Jul	M07	3	Saline	3	2	11.2	1	28.9	6.12	10.49	8.53	28.1	6	23.03	8.47	1	25.3	85.2171	M07Jul2013	0	0	0	0	0	0	1	0	0	0	0	0	0	0	0	4	0	0	0	12	0	0	0	0	0	0	0	0
M08Jul2013	2013	Jul	M08	1	Saline	3	1.2	5.48	1.2	29.2	4.68	26.75	8.38	29.9	3.98	28.48	8.33	0	24.2	108.817	M08Jul2013	0	0	0	0	0	0	0	0	0	0	0	0	0	0	0	0	0	0	0	2	0	0	0	0	0	0	0	0
M08Jul2013	2013	Jul	M08	2	Saline	3	1.2	5.48	1.2	29.2	4.68	26.75	8.38	29.9	3.98	28.48	8.33	0	24.2	108.817	M08Jul2013	0	0	0	0	0	0	3	0	0	0	0	0	0	0	0	0	0	0	0	1	0	0	0	0	0	0	0	0
M08Jul2013	2013	Jul	M08	3	Saline	3	1.2	5.48	1.2	29.2	4.68	26.75	8.38	29.9	3.98	28.48	8.33	0	24.2	108.817	M08Jul2013	0	0	0	0	0	0	1	0	0	0	0	0	0	0	0	2	0	0	0	1	0	0	0	0	0	0	0	0
M09Jul2013	2013	Jul	M09	1	Saline	3	1.5	4.5	1.4	27.5	5.87	24.72	8.49	27.1	5.26	29.76	8.47	0	25.1	178.814	M09Jul2013	0	1	0	0	0	1	0	0	0	0	0	0	0	0	0	0	0	0	0	0	0	0	0	0	0	0	0	0
M09Jul2013	2013	Jul	M09	2	Saline	3	1.5	4.5	1.4	27.5	5.87	24.72	8.49	27.1	5.26	29.76	8.47	0	25.1	178.814	M09Jul2013	0	0	0	0	0	0	0	0	0	0	0	0	0	0	0	0	0	0	0	0	0	0	0	0	0	0	0	0
M09Jul2013	2013	Jul	M09	3	Saline	3	1.5	4.5	1.4	27.5	5.87	24.72	8.49	27.1	5.26	29.76	8.47	0	25.1	178.814	M09Jul2013	0	0	0	0	0	0	1	0	0	0	0	0	0	0	0	2	0	0	0	0	0	0	0	0	0	0	0	0
M10Jul2013	2013	Jul	M10	1	Saline	3	1.5	5.94	1.5	30.2	4.81	29.32	8.6	30.2	4.94	29.45	8.6	0	26	80.7917	M10Jul2013	0	0	0	0	0	0	13	0	0	0	0	0	0	0	0	4	0	0	0	0	0	0	0	0	0	0	0	0
M10Jul2013	2013	Jul	M10	2	Saline	3	1.5	5.94	1.5	30.2	4.81	29.32	8.6	30.2	4.94	29.45	8.6	0	26	80.7917	M10Jul2013	0	0	0	0	0	0	11	0	0	0	0	0	0	0	0	4	0	0	0	0	0	0	0	0	0	0	0	0
M10Jul2013	2013	Jul	M10	3	Saline	3	1.5	5.94	1.5	30.2	4.81	29.32	8.6	30.2	4.94	29.45	8.6	0	26	80.7917	M10Jul2013	0	0	0	0	0	0	5	0	0	0	0	0	0	0	0	2	0	0	0	0	0	0	0	0	0	0	0	0
M11Jul2013	2013	Jul	M11	1	Saline	3	1.8	3.62	1.8	28.8	2.73	29.52	8.58	28.8	3.14	29.52	8.58	0	25.8	79.315	M11Jul2013	0	0	0	0	0	0	1	0	0	0	0	0	0	0	0	0	0	0	0	0	0	0	0	0	0	0	0	0
M11Jul2013	2013	Jul	M11	2	Saline	3	1.8	3.62	1.8	28.8	2.73	29.52	8.58	28.8	3.14	29.52	8.58	0	25.8	79.315	M11Jul2013	0	0	0	0	0	0	0	0	0	0	0	0	0	0	0	3	0	0	0	0	0	0	0	0	0	0	0	0
M11Jul2013	2013	Jul	M11	3	Saline	3	1.8	3.62	1.8	28.8	2.73	29.52	8.58	28.8	3.14	29.52	8.58	0	25.8	79.315	M11Jul2013	0	0	0	0	0	0	1	0	0	0	0	0	0	0	0	0	0	0	0	0	0	0	0	0	0	0	0	0
M12Jul2013	2013	Jul	M12	1	Saline	3	1.6	3.09	1.3	26	1.11	29.33	8.32	26.4	1.1	25.08	8.27	0	27.6	165.017	M12Jul2013	0	0	0	0	0	0	3	0	0	0	0	0	0	0	0	0	0	0	0	0	0	0	0	0	0	0	0	0
M12Jul2013	2013	Jul	M12	2	Saline	3	1.6	3.09	1.3	26	1.11	29.33	8.32	26.4	1.1	25.08	8.27	0	27.6	165.017	M12Jul2013	0	3	0	0	0	0	0	0	0	0	0	0	0	0	0	0	0	0	0	0	0	0	0	0	0	0	0	0
M12Jul2013	2013	Jul	M12	3	Saline	3	1.6	3.09	1.3	26	1.11	29.33	8.32	26.4	1.1	25.08	8.27	0	27.6	165.017	M12Jul2013	0	1	0	0	0	0	0	0	0	0	0	0	0	0	0	0	0	0	0	0	0	0	0	0	0	0	0	0
M13Jul2013	2013	Jul	M13	1	Saline	3	0.6	2.78	0.6	27.7	1.05	27.85	8.3	27.6	1.05	27.9	8.29	0	27.6	183.167	M13Jul2013	0	0	0	0	0	0	0	0	0	0	0	0	0	0	0	0	0	0	0	0	0	0	0	0	0	0	0	0
M13Jul2013	2013	Jul	M13	2	Saline	3	0.6	2.78	0.6	27.7	1.05	27.85	8.3	27.6	1.05	27.9	8.29	0	27.6	183.167	M13Jul2013	0	0	0	0	0	0	0	0	0	0	0	0	0	0	0	1	0	0	0	0	0	0	0	0	0	0	0	0
M13Jul2013	2013	Jul	M13	3	Saline	3	0.6	2.78	0.6	27.7	1.05	27.85	8.3	27.6	1.05	27.9	8.29	0	27.6	183.167	M13Jul2013	0	0	0	0	0	0	1	0	0	0	0	0	0	0	0	0	0	0	0	0	0	0	0	0	0	0	0	0
M14Jul2013	2013	Jul	M14	1	Estuarine	3	2.2	18.6	0.5	29.2	5.69	0.26	8.15	29.2	5.68	0.26	8.1	1	25.4	91.1083	M14Jul2013	0	0	0	0	0	0	0	0	0	0	0	0	0	0	0	0	0	0	0	0	0	0	0	0	0	0	0	0
M14Jul2013	2013	Jul	M14	2	Estuarine	3	2.2	18.6	0.5	29.2	5.69	0.26	8.15	29.2	5.68	0.26	8.1	1	25.4	91.1083	M14Jul2013	0	0	0	0	0	0	0	0	0	0	0	0	0	0	0	0	0	0	0	0	0	0	0	0	0	0	0	0
M14Jul2013	2013	Jul	M14	3	Estuarine	3	2.2	18.6	0.5	29.2	5.69	0.26	8.15	29.2	5.68	0.26	8.1	1	25.4	91.1083	M14Jul2013	0	0	0	0	0	0	0	0	0	0	0	0	0	0	0	0	0	0	0	0	0	0	0	0	0	0	0	0
M15Jul2013	2013	Jul	M15	1	Fresh	3	1.9	8.26	0.8	30.3	4.34	0.67	7.79	29.3	3.89	0.68	7.69	0	30.3	111.3	M15Jul2013	0	0	0	0	0	0	0	0	0	0	0	0	0	0	0	0	0	0	0	0	0	0	0	0	0	0	0	0
M15Jul2013	2013	Jul	M15	2	Fresh	3	1.9	8.26	0.8	30.3	4.34	0.67	7.79	29.3	3.89	0.68	7.69	0	30.3	111.3	M15Jul2013	0	0	0	0	0	0	0	0	0	0	0	0	0	0	0	0	0	0	0	0	0	0	0	0	0	0	0	0
M15Jul2013	2013	Jul	M15	3	Fresh	3	1.9	8.26	0.8	30.3	4.34	0.67	7.79	29.3	3.89	0.68	7.69	0	30.3	111.3	M15Jul2013	0	0	0	0	0	0	0	0	0	0	0	0	0	0	0	0	0	0	0	0	0	0	0	0	0	0	0	0
M01Oct2013	2013	Oct	M01	1	Fresh	4	2	6.76	0.9	28.1	4.47	0.46	7.65	28.1	4.17	0.46	7.38	0	30.2	114	M01Oct2013	0	0	0	0	0	0	0	0	0	0	0	0	0	0	0	0	0	0	0	0	0	0	0	0	0	0	0	0
M01Oct2013	2013	Oct	M01	2	Fresh	4	2	6.76	0.9	28.1	4.47	0.46	7.65	28.1	4.17	0.46	7.38	0	30.2	114	M01Oct2013	0	0	0	0	0	0	0	0	0	0	0	0	0	0	0	0	0	0	0	0	0	0	0	0	0	0	0	0
M01Oct2013	2013	Oct	M01	3	Fresh	4	2	6.76	0.9	28.1	4.47	0.46	7.65	28.1	4.17	0.46	7.38	0	30.2	114	M01Oct2013	0	0	0	0	0	0	0	0	0	0	0	0	0	0	0	0	0	0	0	0	0	0	0	0	0	0	0	0
M02Oct2013	2013	Oct	M02	1	Estuarine	4	1.3	6.59	0.8	28	4.62	0.33	8.02	27.9	4.37	0.33	7.74	1	30.2	192.6	M02Oct2013	0	0	0	0	0	0	0	0	0	0	0	0	0	0	0	0	0	0	0	0	0	0	0	0	0	0	0	0
M02Oct2013	2013	Oct	M02	2	Estuarine	4	1.3	6.59	0.8	28	4.62	0.33	8.02	27.9	4.37	0.33	7.74	1	30.2	192.6	M02Oct2013	0	0	0	0	0	0	0	0	0	0	0	0	0	0	0	0	0	0	0	0	0	0	0	0	0	0	0	0
M02Oct2013	2013	Oct	M02	3	Estuarine	4	1.3	6.59	0.8	28	4.62	0.33	8.02	27.9	4.37	0.33	7.74	1	30.2	192.6	M02Oct2013	0	0	0	0	0	0	0	0	0	0	0	0	0	0	0	0	0	0	0	0	0	0	0	0	0	0	0	0
M04Oct2013	2013	Oct	M04	1	Estuarine	4	2.1	11.1	0.5	17.8	6.04	0.21	7.86	27.8	5.76	0.21	7.69	1	27.7	294.824	M04Oct2013	0	0	0	0	0	0	0	0	0	0	0	0	0	0	0	0	0	0	0	0	0	0	0	0	0	0	0	0
M04Oct2013	2013	Oct	M04	2	Estuarine	4	2.1	11.1	0.5	17.8	6.04	0.21	7.86	27.8	5.76	0.21	7.69	1	27.7	294.824	M04Oct2013	0	0	0	0	0	0	0	0	0	0	0	0	0	0	0	0	0	0	0	0	0	0	0	0	0	0	0	0
M04Oct2013	2013	Oct	M04	3	Estuarine	4	2.1	11.1	0.5	17.8	6.04	0.21	7.86	27.8	5.76	0.21	7.69	1	27.7	294.824	M04Oct2013	0	0	0	0	0	0	0	0	0	0	0	0	0	0	0	0	0	0	0	0	0	0	0	0	0	0	0	0
M05Oct2013	2013	Oct	M05	1	Estuarine	4	2.7	5.16	0.6	27.8	5.44	3.03	7.91	28.5	4.31	7.62	7.59	1	27.2	205.9	M05Oct2013	0	0	0	0	0	0	0	0	0	0	0	0	0	0	0	0	0	0	0	0	0	0	0	0	0	0	0	0
M05Oct2013	2013	Oct	M05	2	Estuarine	4	2.7	5.16	0.6	27.8	5.44	3.03	7.91	28.5	4.31	7.62	7.59	1	27.2	205.9	M05Oct2013	0	0	0	0	0	0	0	0	0	0	0	0	0	0	0	0	0	0	0	0	0	0	0	0	0	0	0	0
M05Oct2013	2013	Oct	M05	3	Estuarine	4	2.7	5.16	0.6	27.8	5.44	3.03	7.91	28.5	4.31	7.62	7.59	1	27.2	205.9	M05Oct2013	0	0	0	0	0	0	0	0	0	0	0	0	0	0	0	0	0	0	0	0	0	0	0	0	0	0	0	0
M06Oct2013	2013	Oct	M06	1	Estuarine	4	3.2	4.23	0.7	27.8	5.27	7.91	7.63	28.5	4.26	21.6	7.67	0	27.7	209.514	M06Oct2013	0	0	0	0	0	0	0	0	0	0	0	0	0	0	0	0	0	0	0	1	0	0	0	0	0	0	0	0
M06Oct2013	2013	Oct	M06	2	Estuarine	4	3.2	4.23	0.7	27.8	5.27	7.91	7.63	28.5	4.26	21.6	7.67	0	27.7	209.514	M06Oct2013	0	0	0	0	0	0	0	0	0	0	0	0	0	0	0	0	0	0	0	3	0	0	0	0	0	0	0	0
M06Oct2013	2013	Oct	M06	3	Estuarine	4	3.2	4.23	0.7	27.8	5.27	7.91	7.63	28.5	4.26	21.6	7.67	0	27.7	209.514	M06Oct2013	0	0	0	0	0	0	0	0	0	0	0	0	0	0	0	0	0	0	0	4	0	0	0	0	0	0	0	0
M07Oct2013	2013	Oct	M07	1	Saline	4	2.3	3.96	1.1	28.8	6.22	21.4	7.92	28.1	5.04	29.25	7.93	0	28.1	85.2171	M07Oct2013	0	1	0	0	0	0	1	0	0	0	1	0	0	0	0	0	0	0	0	3	0	0	0	0	0	0	0	0
M07Oct2013	2013	Oct	M07	2	Saline	4	2.3	3.96	1.1	28.8	6.22	21.4	7.92	28.1	5.04	29.25	7.93	0	28.1	85.2171	M07Oct2013	0	0	0	0	0	0	0	0	0	0	1	0	0	0	0	0	0	0	0	0	0	0	0	0	0	0	0	0
M07Oct2013	2013	Oct	M07	3	Saline	4	2.3	3.96	1.1	28.8	6.22	21.4	7.92	28.1	5.04	29.25	7.93	0	28.1	85.2171	M07Oct2013	0	0	0	0	0	0	1	0	0	0	1	0	0	0	0	0	0	0	0	3	0	0	0	0	0	0	0	0
M08Oct2013	2013	Oct	M08	1	Saline	4	1.3	5.01	0.9	28.7	4.7	21.28	7.71	28.5	4.7	21.49	7.66	0	28.3	108.817	M08Oct2013	0	0	0	0	0	0	3	0	0	0	0	0	0	0	0	0	0	0	0	0	0	0	0	0	0	0	0	0
M08Oct2013	2013	Oct	M08	2	Saline	4	1.3	5.01	0.9	28.7	4.7	21.28	7.71	28.5	4.7	21.49	7.66	0	28.3	108.817	M08Oct2013	0	0	0	0	0	0	1	0	0	0	0	0	0	0	0	0	0	0	0	0	0	0	0	0	0	0	0	0
M08Oct2013	2013	Oct	M08	3	Saline	4	1.3	5.01	0.9	28.7	4.7	21.28	7.71	28.5	4.7	21.49	7.66	0	28.3	108.817	M08Oct2013	0	0	0	0	0	0	0	0	0	0	0	0	0	0	0	0	0	0	0	0	0	0	0	0	0	0	0	0
M09Oct2013	2013	Oct	M09	1	Saline	4	1.8	6.36	1	28.1	5.61	25.69	7.89	27.9	5.34	27.84	7.9	0	27.8	178.814	M09Oct2013	0	0	0	0	0	0	0	0	0	0	0	0	0	0	0	0	0	0	0	0	0	0	0	0	0	0	0	0
M09Oct2013	2013	Oct	M09	2	Saline	4	1.8	6.36	1	28.1	5.61	25.69	7.89	27.9	5.34	27.84	7.9	0	27.8	178.814	M09Oct2013	0	0	0	0	0	0	3	0	0	0	0	0	0	0	0	0	0	0	0	0	0	0	0	0	0	0	0	0
M09Oct2013	2013	Oct	M09	3	Saline	4	1.8	6.36	1	28.1	5.61	25.69	7.89	27.9	5.34	27.84	7.9	0	27.8	178.814	M09Oct2013	0	0	0	0	0	0	2	0	0	0	0	0	0	0	0	0	0	0	0	0	0	0	0	0	0	0	0	0
M10Oct2013	2013	Oct	M10	1	Saline	4	1.8	3.2	1.7	27.6	5.04	25.97	7.88	27.6	4.46	25.96	7.89	0	26.4	80.7917	M10Oct2013	0	0	0	0	0	0	5	0	0	0	0	0	0	0	0	1	0	0	0	1	0	0	0	0	0	0	0	0
M10Oct2013	2013	Oct	M10	2	Saline	4	1.8	3.2	1.7	27.6	5.04	25.97	7.88	27.6	4.46	25.96	7.89	0	26.4	80.7917	M10Oct2013	0	0	0	0	0	0	4	0	0	0	0	0	0	0	0	0	0	0	0	0	0	0	0	0	0	0	0	1
M10Oct2013	2013	Oct	M10	3	Saline	4	1.8	3.2	1.7	27.6	5.04	25.97	7.88	27.6	4.46	25.96	7.89	0	26.4	80.7917	M10Oct2013	0	0	0	0	0	0	10	0	0	0	0	0	0	0	0	0	0	0	0	2	0	0	0	0	0	0	0	0
M11Oct2013	2013	Oct	M11	1	Saline	4	2.3	6.34	1.1	27.6	5.7	28.6	7.89	27.6	5.55	28.64	7.89	0	26.6	79.315	M11Oct2013	0	0	0	0	0	0	0	0	0	0	1	0	0	0	0	0	0	0	0	2	0	0	0	0	0	0	0	0
M11Oct2013	2013	Oct	M11	2	Saline	4	2.3	6.34	1.1	27.6	5.7	28.6	7.89	27.6	5.55	28.64	7.89	0	26.6	79.315	M11Oct2013	0	0	0	0	0	0	0	0	0	0	1	0	0	0	0	0	0	0	0	5	0	0	0	0	0	0	0	0
M11Oct2013	2013	Oct	M11	3	Saline	4	2.3	6.34	1.1	27.6	5.7	28.6	7.89	27.6	5.55	28.64	7.89	0	26.6	79.315	M11Oct2013	0	0	0	0	0	0	0	0	0	0	2	0	0	0	0	0	0	0	0	15	0	0	0	0	0	0	0	0
M12Oct2013	2013	Oct	M12	1	Saline	4	2	2.61	2.61	27.9	5.88	32.23	7.91	28	5.18	35.07	7.94	0	27.4	165.017	M12Oct2013	0	0	0	0	0	0	0	0	0	0	0	0	0	0	0	0	0	0	0	0	0	0	0	0	0	0	0	0
M12Oct2013	2013	Oct	M12	2	Saline	4	2	2.61	2.61	27.9	5.88	32.23	7.91	28	5.18	35.07	7.94	0	27.4	165.017	M12Oct2013	0	0	0	0	0	0	0	0	0	0	0	0	0	0	0	0	0	0	0	0	0	0	0	0	0	0	0	0
M12Oct2013	2013	Oct	M12	3	Saline	4	2	2.61	2.61	27.9	5.88	32.23	7.91	28	5.18	35.07	7.94	0	27.4	165.017	M12Oct2013	0	1	0	0	0	0	1	0	0	0	0	0	0	0	0	0	0	0	0	0	0	0	0	0	0	0	0	0
M13Oct2013	2013	Oct	M13	1	Saline	4	1.6	6.9	0.9	27.7	5.16	27.3	7.9	27.8	4.99	29.1	7.9	0	27.6	183.167	M13Oct2013	0	0	0	0	0	0	1	0	0	0	0	0	0	0	0	0	0	0	0	0	0	0	0	0	0	0	0	0
M13Oct2013	2013	Oct	M13	2	Saline	4	1.6	6.9	0.9	27.7	5.16	27.3	7.9	27.8	4.99	29.1	7.9	0	27.6	183.167	M13Oct2013	0	0	0	0	0	0	0	0	0	0	0	0	0	0	0	1	0	0	0	0	0	0	0	0	0	0	0	0
M13Oct2013	2013	Oct	M13	3	Saline	4	1.6	6.9	0.9	27.7	5.16	27.3	7.9	27.8	4.99	29.1	7.9	0	27.6	183.167	M13Oct2013	0	0	0	0	0	0	0	0	0	0	0	0	0	0	0	0	0	0	0	0	0	0	0	0	0	0	0	0
M14Oct2013	2013	Oct	M14	1	Estuarine	4	3.1	10.9	0.5	27.7	5.04	0.2	8.07	27.6	5.08	0.2	7.75	0	28.6	91.1083	M14Oct2013	0	0	0	0	0	0	0	0	0	0	0	0	0	0	0	0	0	0	0	0	0	0	0	0	0	0	0	0
M14Oct2013	2013	Oct	M14	2	Estuarine	4	3.1	10.9	0.5	27.7	5.04	0.2	8.07	27.6	5.08	0.2	7.75	0	28.6	91.1083	M14Oct2013	0	0	0	0	0	0	0	0	0	0	0	0	0	0	0	0	0	0	0	0	0	0	0	0	0	0	0	0
M14Oct2013	2013	Oct	M14	3	Estuarine	4	3.1	10.9	0.5	27.7	5.04	0.2	8.07	27.6	5.08	0.2	7.75	0	28.6	91.1083	M14Oct2013	0	0	0	0	0	0	0	0	0	0	0	0	0	0	0	0	0	0	0	0	0	0	0	0	0	0	0	0
M11Jan2014	2014	Jan	M11	1	Saline	4	2.1	6.77	1	17.2	9.55	34.82	8.07	17.2	10.65	34.86	8.07	0	20.2	79.315	M11Jan2014	0	0	0	0	0	0	1	0	0	0	0	0	0	0	0	1	0	0	0	1	0	0	0	0	0	0	0	2
M11Jan2014	2014	Jan	M11	2	Saline	4	2.1	6.77	1	17.2	9.55	34.82	8.07	17.2	10.65	34.86	8.07	0	20.2	79.315	M11Jan2014	0	0	0	0	0	0	0	0	0	0	0	0	0	0	0	1	0	0	0	0	0	0	0	0	0	0	0	0
M11Jan2014	2014	Jan	M11	3	Saline	4	2.1	6.77	1	17.2	9.55	34.82	8.07	17.2	10.65	34.86	8.07	0	20.2	79.315	M11Jan2014	0	0	0	0	0	0	0	0	0	0	0	0	0	0	0	0	0	0	0	0	0	0	0	0	0	0	0	1
M12Jan2014	2014	Jan	M12	1	Saline	4	1.6	12.6	0.8	17.3	11.35	33.48	8.08	17.4	11.83	33.47	8.08	0	6.2	165.017	M12Jan2014	0	0	0	0	0	0	1	0	0	0	0	0	0	0	0	0	0	0	0	0	0	0	0	0	0	0	0	0
M12Jan2014	2014	Jan	M12	2	Saline	4	1.6	12.6	0.8	17.3	11.35	33.48	8.08	17.4	11.83	33.47	8.08	0	6.2	165.017	M12Jan2014	0	0	0	0	0	0	0	0	0	0	0	0	0	0	0	0	0	0	0	0	0	0	0	0	0	0	0	0
M12Jan2014	2014	Jan	M12	3	Saline	4	1.6	12.6	0.8	17.3	11.35	33.48	8.08	17.4	11.83	33.47	8.08	0	6.2	165.017	M12Jan2014	0	0	0	0	0	0	0	0	0	0	0	0	0	0	0	0	0	0	0	0	0	0	0	0	0	0	0	2
M14Jan2014	2014	Jan	M14	1	Estuarine	4	2.5	5.36	1	17.2	11.02	10.5	7.94	17.2	14.05	12.6	7.86	1	18.1	91.1083	M14Jan2014	0	0	0	0	0	0	0	0	0	0	0	0	0	0	0	0	0	0	0	0	0	0	0	0	0	0	0	0
M14Jan2014	2014	Jan	M14	2	Estuarine	4	2.5	5.36	1	17.2	11.02	10.5	7.94	17.2	14.05	12.6	7.86	1	18.1	91.1083	M14Jan2014	0	0	0	0	0	0	0	0	0	0	0	0	0	0	0	0	0	0	0	0	0	0	0	0	0	0	0	0
M14Jan2014	2014	Jan	M14	3	Estuarine	4	2.5	5.36	1	17.2	11.02	10.5	7.94	17.2	14.05	12.6	7.86	1	18.1	91.1083	M14Jan2014	0	0	0	0	0	0	0	0	0	0	0	0	0	0	0	0	0	0	0	0	0	0	0	0	0	0	0	0
M01Apr2014	2014	Apr	M01	1	Fresh	4	1.5	9.53	0.6	25.1	6.87	0.98	8.18	25	6.7	0.98	8.13	0	78	114	M01Apr2014	0	0	0	0	0	0	0	0	0	0	0	0	0	0	0	0	0	0	0	0	0	0	0	0	0	0	0	0
M01Apr2014	2014	Apr	M01	2	Fresh	4	1.5	9.53	0.6	25.1	6.87	0.98	8.18	25	6.7	0.98	8.13	0	78	114	M01Apr2014	0	0	0	0	0	0	0	0	0	0	0	0	0	0	0	0	0	0	0	0	0	0	0	0	0	0	0	0
M01Apr2014	2014	Apr	M01	3	Fresh	4	1.5	9.53	0.6	25.1	6.87	0.98	8.18	25	6.7	0.98	8.13	0	78	114	M01Apr2014	0	0	0	0	0	0	0	0	0	0	0	0	0	0	0	0	0	0	0	0	0	0	0	0	0	0	0	0
M03Apr2014	2014	Apr	M03	1	Estuarine	4	2.9	1.78	1.7	23.6	7.05	17.77	8.22	24.5	4.25	20.56	7.93	1	78	274.057	M03Apr2014	0	0	0	0	0	0	0	0	0	0	0	0	0	0	0	0	0	0	0	0	0	0	0	0	0	0	0	0
M03Apr2014	2014	Apr	M03	2	Estuarine	4	2.9	1.78	1.7	23.6	7.05	17.77	8.22	24.5	4.25	20.56	7.93	1	78	274.057	M03Apr2014	0	0	0	0	0	0	0	0	0	0	0	0	0	0	0	0	0	0	0	0	0	0	0	0	0	0	0	0
M03Apr2014	2014	Apr	M03	3	Estuarine	4	2.9	1.78	1.7	23.6	7.05	17.77	8.22	24.5	4.25	20.56	7.93	1	78	274.057	M03Apr2014	0	0	0	0	0	0	0	0	0	0	0	0	0	0	0	0	0	0	0	0	0	0	0	0	0	0	0	0
M04Apr2014	2014	Apr	M04	1	Estuarine	4	1.6	7.12	1	23.6	6.65	19.37	8.09	24.1	5.4	20.97	8.03	1	80	294.824	M04Apr2014	0	0	0	0	0	0	0	0	0	0	0	0	0	0	0	0	0	0	0	0	0	0	0	0	0	0	0	0
M04Apr2014	2014	Apr	M04	2	Estuarine	4	1.6	7.12	1	23.6	6.65	19.37	8.09	24.1	5.4	20.97	8.03	1	80	294.824	M04Apr2014	0	0	0	0	0	0	0	0	0	0	0	0	0	0	0	0	0	0	0	0	0	0	0	0	0	0	0	0
M04Apr2014	2014	Apr	M04	3	Estuarine	4	1.6	7.12	1	23.6	6.65	19.37	8.09	24.1	5.4	20.97	8.03	1	80	294.824	M04Apr2014	0	0	0	0	0	0	0	0	0	0	0	0	0	0	0	0	0	0	0	0	0	0	0	0	0	0	0	0
M05Apr2014	2014	Apr	M05	1	Estuarine	4	2.3	5.68	1	23.4	6.12	25.41	8.15	23.5	6.07	26.87	8.17	1	25.6	205.9	M05Apr2014	0	0	0	0	0	0	0	0	0	0	0	0	0	0	0	0	0	0	0	0	0	0	0	0	0	0	0	0
M05Apr2014	2014	Apr	M05	1	Estuarine	4	2.3	5.68	1	23.4	6.12	25.41	8.15	23.5	6.07	26.87	8.17	1	25.6	205.9	M05Apr2014	0	0	0	0	0	0	0	0	0	0	0	0	0	0	0	0	0	0	0	0	0	0	0	0	0	0	0	0
M05Apr2014	2014	Apr	M05	1	Estuarine	4	2.3	5.68	1	23.4	6.12	25.41	8.15	23.5	6.07	26.87	8.17	1	25.6	205.9	M05Apr2014	0	0	0	0	0	0	0	0	0	0	0	0	0	0	0	0	0	0	0	0	0	0	0	0	0	0	0	0
M06Apr2014	2014	Apr	M06	1	Estuarine	4	2.9	5.08	1	23.3	6.2	30.03	8.22	23.1	5.94	31.24	8.24	0	77	209.514	M06Apr2014	0	0	0	0	0	0	0	0	0	0	0	0	0	0	0	0	0	0	0	0	0	0	0	0	0	0	0	0
M06Apr2014	2014	Apr	M06	2	Estuarine	4	2.9	5.08	1	23.3	6.2	30.03	8.22	23.1	5.94	31.24	8.24	0	77	209.514	M06Apr2014	0	0	0	0	0	0	0	0	0	0	0	0	0	0	0	0	0	0	0	0	0	0	0	0	0	0	0	0
M06Apr2014	2014	Apr	M06	3	Estuarine	4	2.9	5.08	1	23.3	6.2	30.03	8.22	23.1	5.94	31.24	8.24	0	77	209.514	M06Apr2014	0	0	0	0	0	0	0	0	0	0	0	0	0	0	0	0	0	0	0	0	0	0	0	0	0	0	0	0
M07Apr2014	2014	Apr	M07	1	Saline	4	2	5.2	1	23.1	6.5	33.31	8.27	23.1	6.51	33.59	8.27	0	80	85.2171	M07Apr2014	0	0	0	0	0	0	0	0	0	0	0	0	0	0	0	0	0	0	0	0	0	0	0	0	0	0	0	0
M07Apr2014	2014	Apr	M07	2	Saline	4	2	5.2	1	23.1	6.5	33.31	8.27	23.1	6.51	33.59	8.27	0	80	85.2171	M07Apr2014	0	0	0	0	0	0	0	0	0	0	0	0	0	0	0	0	0	0	0	0	0	0	0	0	0	0	0	0
M07Apr2014	2014	Apr	M07	3	Saline	4	2	5.2	1	23.1	6.5	33.31	8.27	23.1	6.51	33.59	8.27	0	80	85.2171	M07Apr2014	0	0	0	0	0	0	0	0	0	0	0	0	0	0	0	0	0	0	0	0	0	0	0	0	0	0	0	1
M09Apr2014	2014	Apr	M09	1	Saline	4	1.3	6.91	1	22.6	6.39	35.42	8.27	22.6	6.25	35.42	8.27	0	80	178.814	M09Apr2014	0	2	0	0	0	0	0	0	0	0	0	0	0	0	0	1	0	0	0	0	0	0	0	0	0	0	0	0
M09Apr2014	2014	Apr	M09	2	Saline	4	1.3	6.91	1	22.6	6.39	35.42	8.27	22.6	6.25	35.42	8.27	0	80	178.814	M09Apr2014	0	1	0	0	0	0	0	0	0	0	0	0	0	0	0	0	0	0	0	0	0	0	0	0	0	0	0	0
M09Apr2014	2014	Apr	M09	3	Saline	4	1.3	6.91	1	22.6	6.39	35.42	8.27	22.6	6.25	35.42	8.27	0	80	178.814	M09Apr2014	0	0	0	0	0	0	0	0	0	0	0	0	0	0	0	0	0	0	0	0	0	0	0	0	0	0	0	0
M11Apr2014	2014	Apr	M11	1	Saline	4	2	4.39	1.3	23.6	5.8	33.23	8.3	23.6	5.58	33.23	8.3	0	67	79.315	M11Apr2014	0	0	0	0	0	0	0	0	0	0	0	0	0	0	0	0	0	0	0	0	0	0	0	0	0	0	0	5
M11Apr2014	2014	Apr	M11	2	Saline	4	2	4.39	1.3	23.6	5.8	33.23	8.3	23.6	5.58	33.23	8.3	0	67	79.315	M11Apr2014	0	0	0	0	0	0	0	0	0	0	0	0	0	0	0	0	0	0	0	0	0	0	0	0	0	0	0	2
M11Apr2014	2014	Apr	M11	3	Saline	4	2	4.39	1.3	23.6	5.8	33.23	8.3	23.6	5.58	33.23	8.3	0	67	79.315	M11Apr2014	0	0	0	0	0	0	2	0	0	0	0	0	0	0	0	0	0	0	0	0	0	0	0	0	0	0	0	2
M14Apr2014	2014	Apr	M14	1	Estuarine	4	2	3.64	1.1	24.1	6.43	13.51	8.02	24.3	5.33	17.3	7.9	1	80	91.1083	M14Apr2014	0	0	0	0	0	0	0	0	0	0	0	0	0	0	0	0	0	0	0	0	0	0	0	0	0	0	0	0
M14Apr2014	2014	Apr	M14	2	Estuarine	4	2	3.64	1.1	24.1	6.43	13.51	8.02	24.3	5.33	17.3	7.9	1	80	91.1083	M14Apr2014	0	0	0	0	0	0	0	0	0	0	0	0	0	0	0	0	0	0	0	0	0	0	0	0	0	0	0	0
M14Apr2014	2014	Apr	M14	3	Estuarine	4	2	3.64	1.1	24.1	6.43	13.51	8.02	24.3	5.33	17.3	7.9	1	80	91.1083	M14Apr2014	0	0	0	0	0	0	0	0	0	0	0	0	0	0	0	0	0	0	0	0	0	0	0	0	0	0	0	0
M01Jul2014	2014	Jul	M01	1	Fresh	4	1.5	10.8	1.4	28.3	4.89	0.6	7.75	28.4	4.52	0.66	7.33	0	29.8	114	M01Jul2014	0	0	0	0	0	0	0	0	0	0	0	0	0	0	0	0	0	0	0	0	0	0	0	0	0	0	0	0
M01Jul2014	2014	Jul	M01	2	Fresh	4	1.5	10.8	1.4	28.3	4.89	0.6	7.75	28.4	4.52	0.66	7.33	0	29.8	114	M01Jul2014	0	0	0	0	0	0	0	0	0	0	0	0	0	0	0	0	0	0	0	0	0	0	0	0	0	0	0	0
M01Jul2014	2014	Jul	M01	3	Fresh	4	1.5	10.8	1.4	28.3	4.89	0.6	7.75	28.4	4.52	0.66	7.33	0	29.8	114	M01Jul2014	0	0	0	0	0	0	0	0	0	0	0	0	0	0	0	0	0	0	0	0	0	0	0	0	0	0	0	0
M03Jul2014	2014	Jul	M03	1	Estuarine	4	3	4.88	0.7	29.2	5.78	4.21	7.54	29.3	0.93	9.87	7.19	0	29.3	274.057	M03Jul2014	0	0	0	0	0	0	0	0	0	0	0	0	0	0	0	0	0	0	0	0	0	0	0	0	0	0	0	0
M03Jul2014	2014	Jul	M03	2	Estuarine	4	3	4.88	0.7	29.2	5.78	4.21	7.54	29.3	0.93	9.87	7.19	0	29.3	274.057	M03Jul2014	0	0	0	0	0	0	0	0	0	0	0	0	0	0	0	0	0	0	0	0	0	0	0	0	0	0	0	0
M03Jul2014	2014	Jul	M03	3	Estuarine	4	3	4.88	0.7	29.2	5.78	4.21	7.54	29.3	0.93	9.87	7.19	0	29.3	274.057	M03Jul2014	0	0	0	0	0	0	0	0	0	0	0	0	0	0	0	0	0	0	0	0	0	0	0	0	0	0	0	0
M04Jul2014	2014	Jul	M04	1	Estuarine	4	1.7	15	0.4	29.2	4.09	1.8	7.22	29.2	2.49	7.62	7.18	1	31.2	294.824	M04Jul2014	0	0	0	0	0	0	0	0	0	0	0	0	0	0	0	0	0	0	0	0	0	0	0	0	0	0	0	0
M04Jul2014	2014	Jul	M04	1	Estuarine	4	1.7	15	0.4	29.2	4.09	1.8	7.22	29.2	2.49	7.62	7.18	1	31.2	294.824	M04Jul2014	0	0	0	0	0	0	0	0	0	0	0	0	0	0	0	0	0	0	0	0	0	0	0	0	0	0	0	0
M04Jul2014	2014	Jul	M04	1	Estuarine	4	1.7	15	0.4	29.2	4.09	1.8	7.22	29.2	2.49	7.62	7.18	1	31.2	294.824	M04Jul2014	0	0	0	0	0	0	0	0	0	0	0	0	0	0	0	0	0	0	0	0	0	0	0	0	0	0	0	0
M05Jul2014	2014	Jul	M05	1	Estuarine	4	2.3	5.91	0.6	29	3.79	10.75	7.39	29	2.85	17.9	7.48	0	29.7	205.9	M05Jul2014	0	0	0	0	0	0	0	0	0	0	0	0	0	0	0	0	0	0	0	0	0	0	0	0	0	0	0	0
M05Jul2014	2014	Jul	M05	2	Estuarine	4	2.3	5.91	0.6	29	3.79	10.75	7.39	29	2.85	17.9	7.48	0	29.7	205.9	M05Jul2014	0	0	0	0	0	0	0	0	0	0	0	0	0	0	0	0	0	0	0	0	0	0	0	0	0	0	0	0
M05Jul2014	2014	Jul	M05	3	Estuarine	4	2.3	5.91	0.6	29	3.79	10.75	7.39	29	2.85	17.9	7.48	0	29.7	205.9	M05Jul2014	0	0	0	0	0	0	0	0	0	0	0	0	0	0	0	0	0	0	0	0	0	0	0	0	0	0	0	0
M07Jul2014	2014	Jul	M07	1	Saline	4	2	6.41	0.5	29.2	5.21	20.15	7.72	28.5	4.85	28.14	7.83	0	28.4	85.2171	M07Jul2014	0	0	0	0	0	0	0	0	0	0	0	0	0	0	0	0	0	0	0	0	0	0	0	0	0	0	0	0
M07Jul2014	2014	Jul	M07	2	Saline	4	2	6.41	0.5	29.2	5.21	20.15	7.72	28.5	4.85	28.14	7.83	0	28.4	85.2171	M07Jul2014	0	0	0	0	0	0	0	0	0	0	0	0	0	0	0	0	0	0	0	0	0	0	0	0	0	0	0	0
M07Jul2014	2014	Jul	M07	3	Saline	4	2	6.41	0.5	29.2	5.21	20.15	7.72	28.5	4.85	28.14	7.83	0	28.4	85.2171	M07Jul2014	0	0	0	0	0	0	0	0	0	0	0	0	0	0	0	0	0	0	0	0	0	0	0	0	0	0	0	0
M09Jul2014	2014	Jul	M09	1	Saline	4	1.3	5.65	0.7	29.6	5.39	28.56	7.88	29.4	5.85	28.56	7.88	0	28.8	178.814	M09Jul2014	0	0	0	0	0	0	0	0	0	0	1	0	0	0	0	0	0	0	0	0	0	0	0	0	0	0	0	1
M09Jul2014	2014	Jul	M09	2	Saline	4	1.3	5.65	0.7	29.6	5.39	28.56	7.88	29.4	5.85	28.56	7.88	0	28.8	178.814	M09Jul2014	0	0	1	0	0	0	0	0	0	0	0	0	0	0	0	0	0	0	0	0	0	0	0	0	0	0	0	0
M09Jul2014	2014	Jul	M09	3	Saline	4	1.3	5.65	0.7	29.6	5.39	28.56	7.88	29.4	5.85	28.56	7.88	0	28.8	178.814	M09Jul2014	0	0	0	0	0	0	0	0	0	0	3	0	0	0	0	0	0	0	0	0	0	0	0	0	0	0	0	0
M11Jul2014	2014	Jul	M11	1	Saline	4	2	2.04	2	28.7	4.58	35.13	8.01	28.7	4.53	35.14	8.01	0	26	79.315	M11Jul2014	0	0	0	0	0	0	0	0	0	0	0	0	0	0	0	0	0	0	0	0	0	0	0	0	0	0	0	0
M11Jul2014	2014	Jul	M11	2	Saline	4	2	2.04	2	28.7	4.58	35.13	8.01	28.7	4.53	35.14	8.01	0	26	79.315	M11Jul2014	0	0	0	0	0	0	0	0	0	0	2	0	0	0	0	0	0	0	0	0	0	0	0	0	0	0	0	0
M11Jul2014	2014	Jul	M11	3	Saline	4	2	2.04	2	28.7	4.58	35.13	8.01	28.7	4.53	35.14	8.01	0	26	79.315	M11Jul2014	0	0	0	0	0	0	0	0	0	0	0	0	0	0	0	0	0	0	0	0	0	0	0	0	0	0	0	0
M14Jul2014	2014	Jul	M14	1	Estuarine	4	2.7	9.19	0.5	28.4	4.86	0.23	7.12	28.3	4.74	0.23	7.05	0	29.2	91.1083	M14Jul2014	0	0	0	0	0	0	0	0	0	0	0	0	0	0	0	0	0	0	0	0	0	0	0	0	0	0	0	0
M14Jul2014	2014	Jul	M14	2	Estuarine	4	2.7	9.19	0.5	28.4	4.86	0.23	7.12	28.3	4.74	0.23	7.05	0	29.2	91.1083	M14Jul2014	0	0	0	0	0	0	0	0	0	0	0	0	0	0	0	0	0	0	0	0	0	0	0	0	0	0	0	0
M14Jul2014	2014	Jul	M14	3	Estuarine	4	2.7	9.19	0.5	28.4	4.86	0.23	7.12	28.3	4.74	0.23	7.05	0	29.2	91.1083	M14Jul2014	0	0	0	0	0	0	0	0	0	0	0	0	0	0	0	0	0	0	0	0	0	0	0	0	0	0	0	0
[truncated: 133 more columns]

## Sheet: Enviro
	Year	Month	Station	Rep	Depth	Turbidity	Secchi	Surface temperature	Surface oxygen	Surface salinity	Surface pH	Bottom temperature	Bottom oxygen	Bottom salinity	Bottom pH	H2S	Air temp	LOI 0-2cm	%LOI 2-5cm	Annual Avgsize
M02Apr2007	2007	Apr	M02	1	1.1	3.5	9.9	24.4	4.61	20.5	7.5	24.4	4.35	21.1	7.47	0	23	2.667	21.506	192.6
M02Apr2007	2007	Apr	M02	2	1.1	3.5	9.9	24.4	4.61	20.5	7.5	24.4	4.35	21.1	7.47	0	23	2.667	21.506	192.6
M02Apr2007	2007	Apr	M02	3	1.1	3.5	9.9	24.4	4.61	20.5	7.5	24.4	4.35	21.1	7.47	0	23	2.667	21.506	192.6
M03Apr2007	2007	Apr	M03	1	2.8	2.51	1.5	24.5	6.99	23.99	7.49	22.7	5.91	26.26	7.23	1	26.7	3.76	24.104	274.057
M03Apr2007	2007	Apr	M03	2	2.8	2.51	1.5	24.5	6.99	23.99	7.49	22.7	5.91	26.26	7.23	1	26.7	3.76	24.104	274.057
M03Apr2007	2007	Apr	M03	3	2.8	2.51	1.5	24.5	6.99	23.99	7.49	22.7	5.91	26.26	7.23	1	26.7	3.76	24.104	274.057
M04Apr2007	2007	Apr	M04	1	1.5	4.97	0.9	23.97	5.67	23.04	7.7	22.9	5.17	27.25	7.47	0	26.5	1.998	21.193	294.824
M04Apr2007	2007	Apr	M04	2	1.5	4.97	0.9	23.97	5.67	23.04	7.7	22.9	5.17	27.25	7.47	0	26.5	1.998	21.193	294.824
M04Apr2007	2007	Apr	M04	3	1.5	4.97	0.9	23.97	5.67	23.04	7.7	22.9	5.17	27.25	7.47	0	26.5	1.998	21.193	294.824
M05Apr2007	2007	Apr	M05	1	2.1	1.98	1.7	23.1	5.82	26.6	7.4	22.7	5.05	30.4	6.99	0	26	10.072	25.037	205.9
M05Apr2007	2007	Apr	M05	2	2.1	1.98	1.7	23.1	5.82	26.6	7.4	22.7	5.05	30.4	6.99	0	26	10.072	25.037	205.9
M05Apr2007	2007	Apr	M05	3	2.1	1.98	1.7	23.1	5.82	26.6	7.4	22.7	5.05	30.4	6.99	0	26	10.072	25.037	205.9
M06Apr2007	2007	Apr	M06	1	2.5	2.03	1.8	23.07	5.92	29.7	7.73	22.4	5.58	32.8	7.17	0	24.8	3.643	24.011	209.514
M06Apr2007	2007	Apr	M06	2	2.5	2.03	1.8	23.07	5.92	29.7	7.73	22.4	5.58	32.8	7.17	0	24.8	3.643	24.011	209.514
M06Apr2007	2007	Apr	M06	3	2.5	2.03	1.8	23.07	5.92	29.7	7.73	22.4	5.58	32.8	7.17	0	24.8	3.643	24.011	209.514
M07Apr2007	2007	Apr	M07	1	2.1	6.87	1.2	22.6	5.83	34.5	7.82	22.6	5.76	35.8	7.86	0	25	5.707	22.606	85.2171
M07Apr2007	2007	Apr	M07	2	2.1	6.87	1.2	22.6	5.83	34.5	7.82	22.6	5.76	35.8	7.86	0	25	5.707	22.606	85.2171
M07Apr2007	2007	Apr	M07	3	2.1	6.87	1.2	22.6	5.83	34.5	7.82	22.6	5.76	35.8	7.86	0	25	5.707	22.606	85.2171
M08Apr2007	2007	Apr	M08	1	1.1	6.96	0.9	22.6	5.14	35.9	7.43	22.6	5.02	35.9	7.48	0	23.1	2.866	23.064	108.817
M08Apr2007	2007	Apr	M08	2	1.1	6.96	0.9	22.6	5.14	35.9	7.43	22.6	5.02	35.9	7.48	0	23.1	2.866	23.064	108.817
M08Apr2007	2007	Apr	M08	3	1.1	6.96	0.9	22.6	5.14	35.9	7.43	22.6	5.02	35.9	7.48	0	23.1	2.866	23.064	108.817
M09Apr2007	2007	Apr	M09	1	1.4	3.7	9.9	22.6	5.64	36.6	7.84	22.4	5.73	36.6	7.75	0	24.4	2.206	24.866	178.814
M09Apr2007	2007	Apr	M09	2	1.4	3.7	9.9	22.6	5.64	36.6	7.84	22.4	5.73	36.6	7.75	0	24.4	2.206	24.866	178.814
M09Apr2007	2007	Apr	M09	3	1.4	3.7	9.9	22.6	5.64	36.6	7.84	22.4	5.73	36.6	7.75	0	24.4	2.206	24.866	178.814
M10Apr2007	2007	Apr	M10	1	1.3	3.93	9.9	24.1	6.11	37.1	7.98	24.1	7.12	37.1	7.95	0	25.9	3.165	21.989	80.7917
M10Apr2007	2007	Apr	M10	2	1.3	3.93	9.9	24.1	6.11	37.1	7.98	24.1	7.12	37.1	7.95	0	25.9	3.165	21.989	80.7917
M10Apr2007	2007	Apr	M10	3	1.3	3.93	9.9	24.1	6.11	37.1	7.98	24.1	7.12	37.1	7.95	0	25.9	3.165	21.989	80.7917
M11Apr2007	2007	Apr	M11	1	1.7	1.96	9.9	23.9	6.51	36.3	7.98	23.9	6.59	36.3	7.94	0	28.1	10.075	19.689	79.315
M11Apr2007	2007	Apr	M11	2	1.7	1.96	9.9	23.9	6.51	36.3	7.98	23.9	6.59	36.3	7.94	0	28.1	10.075	19.689	79.315
M11Apr2007	2007	Apr	M11	3	1.7	1.96	9.9	23.9	6.51	36.3	7.98	23.9	6.59	36.3	7.94	0	28.1	10.075	19.689	79.315
M12Apr2007	2007	Apr	M12	1	1.4	4.27	9.9	23.9	6.12	35.5	8.03	23.9	6.15	35.4	8	0	25	3.72	22.406	165.017
M12Apr2007	2007	Apr	M12	2	1.4	4.27	9.9	23.9	6.12	35.5	8.03	23.9	6.15	35.4	8	0	25	3.72	22.406	165.017
M12Apr2007	2007	Apr	M12	3	1.4	4.27	9.9	23.9	6.12	35.5	8.03	23.9	6.15	35.4	8	0	25	3.72	22.406	165.017
M13Apr2007	2007	Apr	M13	1	0.9	2.29	9.9	24.2	6.6	35.1	8.1	24.2	6.43	35.1	8.03	0	24.6	2.954	19.695	183.167
M13Apr2007	2007	Apr	M13	2	0.9	2.29	9.9	24.2	6.6	35.1	8.1	24.2	6.43	35.1	8.03	0	24.6	2.954	19.695	183.167
M13Apr2007	2007	Apr	M13	3	0.9	2.29	9.9	24.2	6.6	35.1	8.1	24.2	6.43	35.1	8.03	0	24.6	2.954	19.695	183.167
M01Jul2007	2007	Jul	M01	1	1.5	5.5	1	27.86	3.55	0.92	7.04	27.84	3.46	0.92	7.08	1	30	3.446	23.007	114
M01Jul2007	2007	Jul	M01	2	1.5	5.5	1	27.86	3.55	0.92	7.04	27.84	3.46	0.92	7.08	1	30	3.446	23.007	114
M01Jul2007	2007	Jul	M01	3	1.5	5.5	1	27.86	3.55	0.92	7.04	27.84	3.46	0.92	7.08	1	30	3.446	23.007	114
M02Jul2007	2007	Jul	M02	1	2	7	0.8	28.2	3.12	2.36	7.38	28.21	3	2.41	7.19	1	27	3.417	22.109	192.6
M02Jul2007	2007	Jul	M02	2	2	7	0.8	28.2	3.12	2.36	7.38	28.21	3	2.41	7.19	1	27	3.417	22.109	192.6
M02Jul2007	2007	Jul	M02	3	2	7	0.8	28.2	3.12	2.36	7.38	28.21	3	2.41	7.19	1	27	3.417	22.109	192.6
M03Jul2007	2007	Jul	M03	1	2.9	3.93	1.1	29.36	5.56	12.14	7.51	29.49	0.61	19.47	6.83	1	29.3	2.342	19.23	274.057
M03Jul2007	2007	Jul	M03	2	2.9	3.93	1.1	29.36	5.56	12.14	7.51	29.49	0.61	19.47	6.83	1	29.3	2.342	19.23	274.057
M03Jul2007	2007	Jul	M03	3	2.9	3.93	1.1	29.36	5.56	12.14	7.51	29.49	0.61	19.47	6.83	1	29.3	2.342	19.23	274.057
M04Jul2007	2007	Jul	M04	1	2	5.32	0.7	29.51	6.53	16.2	7.63	29.43	3.51	18.64	6.79	0	30.3	7.087	23.275	294.824
M04Jul2007	2007	Jul	M04	2	2	5.32	0.7	29.51	6.53	16.2	7.63	29.43	3.51	18.64	6.79	0	30.3	7.087	23.275	294.824
M04Jul2007	2007	Jul	M04	3	2	5.32	0.7	29.51	6.53	16.2	7.63	29.43	3.51	18.64	6.79	0	30.3	7.087	23.275	294.824
M05Jul2007	2007	Jul	M05	1	2.2	4.08	1	28.84	5.24	17.12	7.63	29.47	3.05	22.93	7.48	1	29	23.6869	22.8505	205.9
M05Jul2007	2007	Jul	M05	2	2.2	4.08	1	28.84	5.24	17.12	7.63	29.47	3.05	22.93	7.48	1	29	23.6869	22.8505	205.9
M05Jul2007	2007	Jul	M05	3	2.2	4.08	1	28.84	5.24	17.12	7.63	29.47	3.05	22.93	7.48	1	29	23.6869	22.8505	205.9
M06Jul2007	2007	Jul	M06	1	2.8	4	0.9	28.9	4.98	19.2	7.6	28.9	3.8	25.8	7.27	0	28.2	22.7324	17.4853	209.514
M06Jul2007	2007	Jul	M06	2	2.8	4	0.9	28.9	4.98	19.2	7.6	28.9	3.8	25.8	7.27	0	28.2	22.7324	17.4853	209.514
M06Jul2007	2007	Jul	M06	3	2.8	4	0.9	28.9	4.98	19.2	7.6	28.9	3.8	25.8	7.27	0	28.2	22.7324	17.4853	209.514
M07Jul2007	2007	Jul	M07	1	2.2	4.47	1.1	28.7	5.1	26.1	7.74	28.4	4.8	28.2	7.63	0	27.5	22.4266	22.2975	85.2171
M07Jul2007	2007	Jul	M07	2	2.2	4.47	1.1	28.7	5.1	26.1	7.74	28.4	4.8	28.2	7.63	0	27.5	22.4266	22.2975	85.2171
M07Jul2007	2007	Jul	M07	3	2.2	4.47	1.1	28.7	5.1	26.1	7.74	28.4	4.8	28.2	7.63	0	27.5	22.4266	22.2975	85.2171
M08Jul2007	2007	Jul	M08	1	0.9	3.5	9.9	28.7	3.9	28.6	7.56	28.7	3.45	29.2	7.63	0	28	24.2391	23.3129	108.817
M08Jul2007	2007	Jul	M08	2	0.9	3.5	9.9	28.7	3.9	28.6	7.56	28.7	3.45	29.2	7.63	0	28	24.2391	23.3129	108.817
M08Jul2007	2007	Jul	M08	3	0.9	3.5	9.9	28.7	3.9	28.6	7.56	28.7	3.45	29.2	7.63	0	28	24.2391	23.3129	108.817
M09Jul2007	2007	Jul	M09	1	1.4	2.91	9.9	28.6	4.8	33.2	7.8	28.7	4.76	33.2	7.79	0	27.8	22.8864	22.7232	178.814
M09Jul2007	2007	Jul	M09	2	1.4	2.91	9.9	28.6	4.8	33.2	7.8	28.7	4.76	33.2	7.79	0	27.8	22.8864	22.7232	178.814
M09Jul2007	2007	Jul	M09	3	1.4	2.91	9.9	28.6	4.8	33.2	7.8	28.7	4.76	33.2	7.79	0	27.8	22.8864	22.7232	178.814
M10Jul2007	2007	Jul	M10	1	1.2	3.45	9.9	28.51	4.56	33.7	7.88	28.52	4.75	33.7	7.77	0	29.7	23.2888	22.5773	80.7917
M10Jul2007	2007	Jul	M10	2	1.2	3.45	9.9	28.51	4.56	33.7	7.88	28.52	4.75	33.7	7.77	0	29.7	23.2888	22.5773	80.7917
M10Jul2007	2007	Jul	M10	3	1.2	3.45	9.9	28.51	4.56	33.7	7.88	28.52	4.75	33.7	7.77	0	29.7	23.2888	22.5773	80.7917
M11Jul2007	2007	Jul	M11	1	1.9	1.89	9.9	28.4	4.52	33.5	7.79	28.4	4.38	33.5	7.68	0	30.2	24.4992	23.7338	79.315
M11Jul2007	2007	Jul	M11	2	1.9	1.89	9.9	28.4	4.52	33.5	7.79	28.4	4.38	33.5	7.68	0	30.2	24.4992	23.7338	79.315
M11Jul2007	2007	Jul	M11	3	1.9	1.89	9.9	28.4	4.52	33.5	7.79	28.4	4.38	33.5	7.68	0	30.2	24.4992	23.7338	79.315
M12Jul2007	2007	Jul	M12	1	1.7	3.78	9.9	28.68	5.35	30.9	7.73	28.45	5.02	33.14	7.71	0	32	22.4864	23.3768	165.017
M12Jul2007	2007	Jul	M12	2	1.7	3.78	9.9	28.68	5.35	30.9	7.73	28.45	5.02	33.14	7.71	0	32	22.4864	23.3768	165.017
M12Jul2007	2007	Jul	M12	3	1.7	3.78	9.9	28.68	5.35	30.9	7.73	28.45	5.02	33.14	7.71	0	32	22.4864	23.3768	165.017
M13Jul2007	2007	Jul	M13	1	0.9	1.58	9.9	28.74	5.32	33.79	7.74	28.73	5.5	33.82	7.77	0	32.3	21.8786	23.5239	183.167
M13Jul2007	2007	Jul	M13	2	0.9	1.58	9.9	28.74	5.32	33.79	7.74	28.73	5.5	33.82	7.77	0	32.3	21.8786	23.5239	183.167
M13Jul2007	2007	Jul	M13	3	0.9	1.58	9.9	28.74	5.32	33.79	7.74	28.73	5.5	33.82	7.77	0	32.3	21.8786	23.5239	183.167
M01Oct2007	2007	Oct	M01	1	2.1	4.97	0.8	26.32	3.48	0.46	7.26	26.29	3.38	0.46	4.2	1	28.2	23.7468	23.9238	114
M01Oct2007	2007	Oct	M01	2	2.1	4.97	0.8	26.32	3.48	0.46	7.26	26.29	3.38	0.46	4.2	1	28.2	23.7468	23.9238	114
M01Oct2007	2007	Oct	M01	3	2.1	4.97	0.8	26.32	3.48	0.46	7.26	26.29	3.38	0.46	4.2	1	28.2	23.7468	23.9238	114
M02Oct2007	2007	Oct	M02	1	1.8	3.93	0.8	26.43	3.41	0.43	7.6	26.4	3.37	0.43	7	1	29.8	27.2042	23.4529	192.6
M02Oct2007	2007	Oct	M02	2	1.8	3.93	0.8	26.43	3.41	0.43	7.6	26.4	3.37	0.43	7	1	29.8	27.2042	23.4529	192.6
M02Oct2007	2007	Oct	M02	3	1.8	3.93	0.8	26.43	3.41	0.43	7.6	26.4	3.37	0.43	7	1	29.8	27.2042	23.4529	192.6
M05Oct2007	2007	Oct	M05	1	2.3	13.3	0.4	25.7	6.73	4.1	7.58	25.6	5.9	5	7.21	1	27.3	26.1027	26.2436	205.9
M05Oct2007	2007	Oct	M05	2	2.3	13.3	0.4	25.7	6.73	4.1	7.58	25.6	5.9	5	7.21	1	27.3	26.1027	26.2436	205.9
M05Oct2007	2007	Oct	M05	3	2.3	13.3	0.4	25.7	6.73	4.1	7.58	25.6	5.9	5	7.21	1	27.3	26.1027	26.2436	205.9
M06Oct2007	2007	Oct	M06	1	2.7	9.09	0.4	25.2	6.29	8.24	7.4	27.1	4.2	26.1	7.75	0	26.8	22.92	20.695	209.514
M06Oct2007	2007	Oct	M06	2	2.7	9.09	0.4	25.2	6.29	8.24	7.4	27.1	4.2	26.1	7.75	0	26.8	22.92	20.695	209.514
M06Oct2007	2007	Oct	M06	3	2.7	9.09	0.4	25.2	6.29	8.24	7.4	27.1	4.2	26.1	7.75	0	26.8	22.92	20.695	209.514
M08Oct2007	2007	Oct	M08	1	1.4	7.84	0.8	25.9	5.66	25.6	7.67	25.9	5.54	26.6	7.7	0	27	24.764	21.663	108.817
M08Oct2007	2007	Oct	M08	2	1.4	7.84	0.8	25.9	5.66	25.6	7.67	25.9	5.54	26.6	7.7	0	27	24.764	21.663	108.817
M08Oct2007	2007	Oct	M08	3	1.4	7.84	0.8	25.9	5.66	25.6	7.67	25.9	5.54	26.6	7.7	0	27	24.764	21.663	108.817
M09Oct2007	2007	Oct	M09	1	1.7	5.97	1	25.2	5.96	27.9	7.81	25	5.79	28.8	7.81	0	27.3	20.809	20.718	178.814
M09Oct2007	2007	Oct	M09	2	1.7	5.97	1	25.2	5.96	27.9	7.81	25	5.79	28.8	7.81	0	27.3	20.809	20.718	178.814
M09Oct2007	2007	Oct	M09	3	1.7	5.97	1	25.2	5.96	27.9	7.81	25	5.79	28.8	7.81	0	27.3	20.809	20.718	178.814
M10Oct2007	2007	Oct	M10	1	1.4	6.12	1	25.7	5.2	27	7.55	25.78	5.09	27	7.52	0	26.2	22.596	21.045	80.7917
M10Oct2007	2007	Oct	M10	2	1.4	6.12	1	25.7	5.2	27	7.55	25.78	5.09	27	7.52	0	26.2	22.596	21.045	80.7917
M10Oct2007	2007	Oct	M10	3	1.4	6.12	1	25.7	5.2	27	7.55	25.78	5.09	27	7.52	0	26.2	22.596	21.045	80.7917
M11Oct2007	2007	Oct	M11	1	1.9	6.22	1	25.69	5.4	29.27	7.85	25.69	5.3	29.27	7.85	0	26.2	20.516	9.776	79.315
M11Oct2007	2007	Oct	M11	2	1.9	6.22	1	25.69	5.4	29.27	7.85	25.69	5.3	29.27	7.85	0	26.2	20.516	9.776	79.315
M11Oct2007	2007	Oct	M11	3	1.9	6.22	1	25.69	5.4	29.27	7.85	25.69	5.3	29.27	7.85	0	26.2	20.516	9.776	79.315
M12Oct2007	2007	Oct	M12	1	1.9	4.83	1.2	26.44	5.31	25.36	7.76	26.39	5.26	25.45	7.75	0	26.6	21.709	19.514	165.017
M12Oct2007	2007	Oct	M12	2	1.9	4.83	1.2	26.44	5.31	25.36	7.76	26.39	5.26	25.45	7.75	0	26.6	21.709	19.514	165.017
M12Oct2007	2007	Oct	M12	3	1.9	4.83	1.2	26.44	5.31	25.36	7.76	26.39	5.26	25.45	7.75	0	26.6	21.709	19.514	165.017
M13Oct2007	2007	Oct	M13	1	1.6	4.09	1	26.08	4.22	21.98	7.65	26.12	4.41	22.88	7.66	0	26.5	21.294	19.994	183.167
M13Oct2007	2007	Oct	M13	2	1.6	4.09	1	26.08	4.22	21.98	7.65	26.12	4.41	22.88	7.66	0	26.5	21.294	19.994	183.167
M13Oct2007	2007	Oct	M13	3	1.6	4.09	1	26.08	4.22	21.98	7.65	26.12	4.41	22.88	7.66	0	26.5	21.294	19.994	183.167
M14Oct2007	2007	Oct	M14	1	1.8	8.07	0.45	25.8	3.79	0.3	6.75	25.8	3.65	0.3	6.34	1	27.5	21.505	18.617	91.1083
M14Oct2007	2007	Oct	M14	2	1.8	8.07	0.45	25.8	3.79	0.3	6.75	25.8	3.65	0.3	6.34	1	27.5	21.505	18.617	91.1083
M14Oct2007	2007	Oct	M14	3	1.8	8.07	0.45	25.8	3.79	0.3	6.75	25.8	3.65	0.3	6.34	1	27.5	21.505	18.617	91.1083
M02Jan2008	2008	Jan	M02	1	1.8	3.02	9.9	17.17	6.9	8.12	7.74	17.21	6.75	8.33	7.75	1	4.2	21.402	20.091	192.6
M02Jan2008	2008	Jan	M02	2	1.8	3.02	9.9	17.17	6.9	8.12	7.74	17.21	6.75	8.33	7.75	1	4.2	21.402	20.091	192.6
M02Jan2008	2008	Jan	M02	3	1.8	3.02	9.9	17.17	6.9	8.12	7.74	17.21	6.75	8.33	7.75	1	4.2	21.402	20.091	192.6
M03Jan2008	2008	Jan	M03	1	3	1.57	1.7	18.89	7.88	13.58	8.02	17.55	6.21	16.17	7.81	1	22.7	21.839	20.59	274.057
M03Jan2008	2008	Jan	M03	2	3	1.57	1.7	18.89	7.88	13.58	8.02	17.55	6.21	16.17	7.81	1	22.7	21.839	20.59	274.057
M03Jan2008	2008	Jan	M03	3	3	1.57	1.7	18.89	7.88	13.58	8.02	17.55	6.21	16.17	7.81	1	22.7	21.839	20.59	274.057
M05Jan2008	2008	Jan	M05	1	2.3	3.95	1.5	19.28	7.28	19.25	7.97	18.72	7.17	20.73	8	1	22.4	21.933	18.696	205.9
M05Jan2008	2008	Jan	M05	2	2.3	3.95	1.5	19.28	7.28	19.25	7.97	18.72	7.17	20.73	8	1	22.4	21.933	18.696	205.9
M05Jan2008	2008	Jan	M05	3	2.3	3.95	1.5	19.28	7.28	19.25	7.97	18.72	7.17	20.73	8	1	22.4	21.933	18.696	205.9
M06Jan2008	2008	Jan	M06	1	2.8	2.42	1.4	18.9	7.24	22.46	8.03	19.06	6.77	25.63	8.05	0	22.2	21.202	17.822	209.514
M06Jan2008	2008	Jan	M06	2	2.8	2.42	1.4	18.9	7.24	22.46	8.03	19.06	6.77	25.63	8.05	0	22.2	21.202	17.822	209.514
M06Jan2008	2008	Jan	M06	3	2.8	2.42	1.4	18.9	7.24	22.46	8.03	19.06	6.77	25.63	8.05	0	22.2	21.202	17.822	209.514
M07Jan2008	2008	Jan	M07	1	2.1	3.65	1.6	22.09	6.54	34.76	8.18	22.23	6.47	35.15	8.19	0	22.8	21.728	20.116	85.2171
M07Jan2008	2008	Jan	M07	2	2.1	3.65	1.6	22.09	6.54	34.76	8.18	22.23	6.47	35.15	8.19	0	22.8	21.728	20.116	85.2171
M07Jan2008	2008	Jan	M07	3	2.1	3.65	1.6	22.09	6.54	34.76	8.18	22.23	6.47	35.15	8.19	0	22.8	21.728	20.116	85.2171
M08Jan2008	2008	Jan	M08	1	1.1	4.69	9.9	20.59	7.01	29.88	8.01	20.57	7.04	29.89	8.02	0	22.8	21.749	21.121	108.817
M08Jan2008	2008	Jan	M08	2	1.1	4.69	9.9	20.59	7.01	29.88	8.01	20.57	7.04	29.89	8.02	0	22.8	21.749	21.121	108.817
M08Jan2008	2008	Jan	M08	3	1.1	4.69	9.9	20.59	7.01	29.88	8.01	20.57	7.04	29.89	8.02	0	22.8	21.749	21.121	108.817
M09Jan2008	2008	Jan	M09	1	1.5	3.76	9.9	20.45	6.55	33.25	8.15	20.86	6.39	33.85	8.16	0	22.3	20.738	17.897	178.814
M09Jan2008	2008	Jan	M09	2	1.5	3.76	9.9	20.45	6.55	33.25	8.15	20.86	6.39	33.85	8.16	0	22.3	20.738	17.897	178.814
M09Jan2008	2008	Jan	M09	3	1.5	3.76	9.9	20.45	6.55	33.25	8.15	20.86	6.39	33.85	8.16	0	22.3	20.738	17.897	178.814
M10Jan2008	2008	Jan	M10	1	1.6	2.12	9.9	17.15	7.22	33.52	8.07	17.17	7.17	33.55	8.09	0	22.3	20.404	19.35	80.7917
M10Jan2008	2008	Jan	M10	2	1.6	2.12	9.9	17.15	7.22	33.52	8.07	17.17	7.17	33.55	8.09	0	22.3	20.404	19.35	80.7917
M10Jan2008	2008	Jan	M10	3	1.6	2.12	9.9	17.15	7.22	33.52	8.07	17.17	7.17	33.55	8.09	0	22.3	20.404	19.35	80.7917
M11Jan2008	2008	Jan	M11	1	2.2	2.93	9.9	17.29	7.63	34.3	8.14	17.25	7.65	34.3	8.16	0	21.5	21.371	19.067	79.315
M11Jan2008	2008	Jan	M11	2	2.2	2.93	9.9	17.29	7.63	34.3	8.14	17.25	7.65	34.3	8.16	0	21.5	21.371	19.067	79.315
M11Jan2008	2008	Jan	M11	3	2.2	2.93	9.9	17.29	7.63	34.3	8.14	17.25	7.65	34.3	8.16	0	21.5	21.371	19.067	79.315
M13Jan2008	2008	Jan	M13	1	1.3	5.04	9.9	16.98	8.17	28.82	8.11	16.98	7.96	28.82	8.12	0	19.2	21.624	19.463	183.167
M13Jan2008	2008	Jan	M13	2	1.3	5.04	9.9	16.98	8.17	28.82	8.11	16.98	7.96	28.82	8.12	0	19.2	21.624	19.463	183.167
M13Jan2008	2008	Jan	M13	3	1.3	5.04	9.9	16.98	8.17	28.82	8.11	16.98	7.96	28.82	8.12	0	19.2	21.624	19.463	183.167
M14Jan2008	2008	Jan	M14	1	2.1	4.68	1.1	19.35	6.75	6.6	6.73	18.41	6.57	12.73	7.75	1	23.7	19.3865	20.5022	91.1083
M14Jan2008	2008	Jan	M14	2	2.1	4.68	1.1	19.35	6.75	6.6	6.73	18.41	6.57	12.73	7.75	1	23.7	19.3865	20.5022	91.1083
M14Jan2008	2008	Jan	M14	3	2.1	4.68	1.1	19.35	6.75	6.6	6.73	18.41	6.57	12.73	7.75	1	23.7	19.3865	20.5022	91.1083
M01Apr2008	2008	Apr	M01	1	2	7.8	0.6	25.36	5.64	0.53	7.43	24.58	4.62	0.53	7.33	0	27	21.4364	19.5712	114
M01Apr2008	2008	Apr	M01	2	2	7.8	0.6	25.36	5.64	0.53	7.43	24.58	4.62	0.53	7.33	0	27	21.4364	19.5712	114
M01Apr2008	2008	Apr	M01	3	2	7.8	0.6	25.36	5.64	0.53	7.43	24.58	4.62	0.53	7.33	0	27	21.4364	19.5712	114
M02Apr2008	2008	Apr	M02	1	2	7.1	0.8	26.1	7.31	0.62	7.6	25.71	6.98	0.62	7.54	1	27.2	20.6892	19.3267	192.6
M02Apr2008	2008	Apr	M02	2	2	7.1	0.8	26.1	7.31	0.62	7.6	25.71	6.98	0.62	7.54	1	27.2	20.6892	19.3267	192.6
M02Apr2008	2008	Apr	M02	3	2	7.1	0.8	26.1	7.31	0.62	7.6	25.71	6.98	0.62	7.54	1	27.2	20.6892	19.3267	192.6
M03Apr2008	2008	Apr	M03	1	2.9	3.6	1.3	25.8	7.05	6.13	7.8	26	5.02	16.05	7.75	1	24.9	20.7859	19.8533	274.057
M03Apr2008	2008	Apr	M03	2	2.9	3.6	1.3	25.8	7.05	6.13	7.8	26	5.02	16.05	7.75	1	24.9	20.7859	19.8533	274.057
M03Apr2008	2008	Apr	M03	3	2.9	3.6	1.3	25.8	7.05	6.13	7.8	26	5.02	16.05	7.75	1	24.9	20.7859	19.8533	274.057
M04Apr2008	2008	Apr	M04	1	1.7	5.2	1	25.4	7.06	12.3	7.85	25.6	6.02	14.4	7.79	1	22.6	18.8467	16.7328	294.824
M04Apr2008	2008	Apr	M04	2	1.7	5.2	1	25.4	7.06	12.3	7.85	25.6	6.02	14.4	7.79	1	22.6	18.8467	16.7328	294.824
M04Apr2008	2008	Apr	M04	3	1.7	5.2	1	25.4	7.06	12.3	7.85	25.6	6.02	14.4	7.79	1	22.6	18.8467	16.7328	294.824
M05Apr2008	2008	Apr	M05	1	2.4	4.4	1.3	25.48	7.07	16.5	7.95	25.36	5.26	21.07	7.89	1	24.7	22.4764	20.4823	205.9
M05Apr2008	2008	Apr	M05	2	2.4	4.4	1.3	25.48	7.07	16.5	7.95	25.36	5.26	21.07	7.89	1	24.7	22.4764	20.4823	205.9
M05Apr2008	2008	Apr	M05	3	2.4	4.4	1.3	25.48	7.07	16.5	7.95	25.36	5.26	21.07	7.89	1	24.7	22.4764	20.4823	205.9
M06Apr2008	2008	Apr	M06	1	3.1	3.3	1.5	25.06	7.13	22.09	8.02	24.58	6.76	30.61	8.11	0	24.8	21.9631	21.588	209.514
M06Apr2008	2008	Apr	M06	2	3.1	3.3	1.5	25.06	7.13	22.09	8.02	24.58	6.76	30.61	8.11	0	24.8	21.9631	21.588	209.514
M06Apr2008	2008	Apr	M06	3	3.1	3.3	1.5	25.06	7.13	22.09	8.02	24.58	6.76	30.61	8.11	0	24.8	21.9631	21.588	209.514
M07Apr2008	2008	Apr	M07	1	2.4	5	1.4	24.43	7.29	29.09	8.1	24.19	6.88	32.03	8.13	0	24.5	22.297	20.7726	85.2171
M07Apr2008	2008	Apr	M07	2	2.4	5	1.4	24.43	7.29	29.09	8.1	24.19	6.88	32.03	8.13	0	24.5	22.297	20.7726	85.2171
M07Apr2008	2008	Apr	M07	3	2.4	5	1.4	24.43	7.29	29.09	8.1	24.19	6.88	32.03	8.13	0	24.5	22.297	20.7726	85.2171
M08Apr2008	2008	Apr	M08	1	1.2	5.6	1	24.27	6.44	31.8	8.04	24.23	6.37	31.8	8.05	0	24.3	21.3374	19.7078	108.817
M08Apr2008	2008	Apr	M08	2	1.2	5.6	1	24.27	6.44	31.8	8.04	24.23	6.37	31.8	8.05	0	24.3	21.3374	19.7078	108.817
M08Apr2008	2008	Apr	M08	3	1.2	5.6	1	24.27	6.44	31.8	8.04	24.23	6.37	31.8	8.05	0	24.3	21.3374	19.7078	108.817
M09Apr2008	2008	Apr	M09	1	1.5	4.5	9.9	24.69	6.75	34.7	8.12	24.69	6.72	34.7	8.13	0	24.5	21.2364	19.2655	178.814
M09Apr2008	2008	Apr	M09	2	1.5	4.5	9.9	24.69	6.75	34.7	8.12	24.69	6.72	34.7	8.13	0	24.5	21.2364	19.2655	178.814
M09Apr2008	2008	Apr	M09	3	1.5	4.5	9.9	24.69	6.75	34.7	8.12	24.69	6.72	34.7	8.13	0	24.5	21.2364	19.2655	178.814
M10Apr2008	2008	Apr	M10	1	1.4	4.9	9.9	24.83	6.48	35.02	8.1	24.85	6.46	35.02	8.1	0	23.7	22.1228	19.8523	80.7917
M10Apr2008	2008	Apr	M10	2	1.4	4.9	9.9	24.83	6.48	35.02	8.1	24.85	6.46	35.02	8.1	0	23.7	22.1228	19.8523	80.7917
M10Apr2008	2008	Apr	M10	3	1.4	4.9	9.9	24.83	6.48	35.02	8.1	24.85	6.46	35.02	8.1	0	23.7	22.1228	19.8523	80.7917
M11Apr2008	2008	Apr	M11	1	1.8	2.8	9.9	24.76	6.6	34.71	8.14	24.76	6.56	34.71	8.15	0	24.3	22.6357	20.1558	79.315
M11Apr2008	2008	Apr	M11	2	1.8	2.8	9.9	24.76	6.6	34.71	8.14	24.76	6.56	34.71	8.15	0	24.3	22.6357	20.1558	79.315
M11Apr2008	2008	Apr	M11	3	1.8	2.8	9.9	24.76	6.6	34.71	8.14	24.76	6.56	34.71	8.15	0	24.3	22.6357	20.1558	79.315
M12Apr2008	2008	Apr	M12	1	1.7	2.3	9.9	24.29	6.76	32.54	8.14	24.4	6.89	33.65	8.17	0	24.7	21.7469	19.9972	165.017
M12Apr2008	2008	Apr	M12	2	1.7	2.3	9.9	24.29	6.76	32.54	8.14	24.4	6.89	33.65	8.17	0	24.7	21.7469	19.9972	165.017
M12Apr2008	2008	Apr	M12	3	1.7	2.3	9.9	24.29	6.76	32.54	8.14	24.4	6.89	33.65	8.17	0	24.7	21.7469	19.9972	165.017
M13Apr2008	2008	Apr	M13	1	1.1	3.4	9.9	24.67	6.71	31.98	8.19	24.63	6.93	32.37	8.23	0	24.6	9.22	7.045	183.167
M13Apr2008	2008	Apr	M13	2	1.1	3.4	9.9	24.67	6.71	31.98	8.19	24.63	6.93	32.37	8.23	0	24.6	9.22	7.045	183.167
M13Apr2008	2008	Apr	M13	3	1.1	3.4	9.9	24.67	6.71	31.98	8.19	24.63	6.93	32.37	8.23	0	24.6	9.22	7.045	183.167
M14Apr2008	2008	Apr	M14	1	2.1	4.4	0.9	25.6	6.38	7.1	7.65	25.7	5.42	8.6	7.54	1	21.6	19.708	14.684	91.1083
M14Apr2008	2008	Apr	M14	2	2.1	4.4	0.9	25.6	6.38	7.1	7.65	25.7	5.42	8.6	7.54	1	21.6	19.708	14.684	91.1083
M14Apr2008	2008	Apr	M14	3	2.1	4.4	0.9	25.6	6.38	7.1	7.65	25.7	5.42	8.6	7.54	1	21.6	19.708	14.684	91.1083
M01Jul2008	2008	Jul	M01	1	1.5	14.3	0.5	26.6	3.06	0.4	7.16	26.6	3.01	0.4	7.16	0	30.9	20.398	15.68	114
M01Jul2008	2008	Jul	M01	2	1.5	14.3	0.5	26.6	3.06	0.4	7.16	26.6	3.01	0.4	7.16	0	30.9	20.398	15.68	114
M01Jul2008	2008	Jul	M01	3	1.5	14.3	0.5	26.6	3.06	0.4	7.16	26.6	3.01	0.4	7.16	0	30.9	20.398	15.68	114
M02Jul2008	2008	Jul	M02	1	1.6	7.4	0.8	27.8	3.86	0.5	7.11	27.8	3.8	0.5	7.14	1	28.3	84.038	20.035	192.6
M02Jul2008	2008	Jul	M02	2	1.6	7.4	0.8	27.8	3.86	0.5	7.11	27.8	3.8	0.5	7.14	1	28.3	84.038	20.035	192.6
M02Jul2008	2008	Jul	M02	3	1.6	7.4	0.8	27.8	3.86	0.5	7.11	27.8	3.8	0.5	7.14	1	28.3	84.038	20.035	192.6
M03Jul2008	2008	Jul	M03	1	2.6	5.9	0.9	29.4	7.63	3	8.16	29	1.92	8.7	7.54	1	29.2	17.405	13.542	274.057
M03Jul2008	2008	Jul	M03	2	2.6	5.9	0.9	29.4	7.63	3	8.16	29	1.92	8.7	7.54	1	29.2	17.405	13.542	274.057
M03Jul2008	2008	Jul	M03	3	2.6	5.9	0.9	29.4	7.63	3	8.16	29	1.92	8.7	7.54	1	29.2	17.405	13.542	274.057
M04Jul2008	2008	Jul	M04	1	1.5	10.5	0.6	29.6	4.21	5.4	7.66	29	3.61	10	7.63	1	29.2	9.19	2.184	294.824
M04Jul2008	2008	Jul	M04	2	1.5	10.5	0.6	29.6	4.21	5.4	7.66	29	3.61	10	7.63	1	29.2	9.19	2.184	294.824
M04Jul2008	2008	Jul	M04	3	1.5	10.5	0.6	29.6	4.21	5.4	7.66	29	3.61	10	7.63	1	29.2	9.19	2.184	294.824
M05Jul2008	2008	Jul	M05	1	2	5.5	1	28.8	5.73	7.6	7.9	28.8	4.74	13.4	7.82	1	30.8	19.804	12.834	205.9
M05Jul2008	2008	Jul	M05	2	2	5.5	1	28.8	5.73	7.6	7.9	28.8	4.74	13.4	7.82	1	30.8	19.804	12.834	205.9
M05Jul2008	2008	Jul	M05	3	2	5.5	1	28.8	5.73	7.6	7.9	28.8	4.74	13.4	7.82	1	30.8	19.804	12.834	205.9
M06Jul2008	2008	Jul	M06	1	2.5	4.9	1	28.8	5.92	10.3	8.02	28.1	4.73	21.5	8.06	0	28.6	18.112	17.623	209.514
M06Jul2008	2008	Jul	M06	2	2.5	4.9	1	28.8	5.92	10.3	8.02	28.1	4.73	21.5	8.06	0	28.6	18.112	17.623	209.514
M06Jul2008	2008	Jul	M06	3	2.5	4.9	1	28.8	5.92	10.3	8.02	28.1	4.73	21.5	8.06	0	28.6	18.112	17.623	209.514
M07Jul2008	2008	Jul	M07	1	2.1	6.8	1.1	28.2	5.92	18.7	8.22	27.9	5.28	32.1	8.3	0	28.4	14.377	9.879	85.2171
M07Jul2008	2008	Jul	M07	2	2.1	6.8	1.1	28.2	5.92	18.7	8.22	27.9	5.28	32.1	8.3	0	28.4	14.377	9.879	85.2171
M07Jul2008	2008	Jul	M07	3	2.1	6.8	1.1	28.2	5.92	18.7	8.22	27.9	5.28	32.1	8.3	0	28.4	14.377	9.879	85.2171
M08Jul2008	2008	Jul	M08	1	0.7	6.2	9.9	28.5	4.31	31.5	8.22	28.6	4.34	32	8.2	0	27.5	15.234	10.001	108.817
M08Jul2008	2008	Jul	M08	2	0.7	6.2	9.9	28.5	4.31	31.5	8.22	28.6	4.34	32	8.2	0	27.5	15.234	10.001	108.817
M08Jul2008	2008	Jul	M08	3	0.7	6.2	9.9	28.5	4.31	31.5	8.22	28.6	4.34	32	8.2	0	27.5	15.234	10.001	108.817
M09Jul2008	2008	Jul	M09	1	1.2	2.5	9.9	27.5	5.71	32.2	8.45	27.6	5.31	32.6	8.43	0	28.3	14.793	6.553	178.814
M09Jul2008	2008	Jul	M09	2	1.2	2.5	9.9	27.5	5.71	32.2	8.45	27.6	5.31	32.6	8.43	0	28.3	14.793	6.553	178.814
M09Jul2008	2008	Jul	M09	3	1.2	2.5	9.9	27.5	5.71	32.2	8.45	27.6	5.31	32.6	8.43	0	28.3	14.793	6.553	178.814
M10Jul2008	2008	Jul	M10	1	1.5	1.4	9.9	28.8	4.77	33.8	8.22	28	5.39	33.8	8.25	0	28.1	19.159	15.041	80.7917
M10Jul2008	2008	Jul	M10	2	1.5	1.4	9.9	28.8	4.77	33.8	8.22	28	5.39	33.8	8.25	0	28.1	19.159	15.041	80.7917
M10Jul2008	2008	Jul	M10	3	1.5	1.4	9.9	28.8	4.77	33.8	8.22	28	5.39	33.8	8.25	0	28.1	19.159	15.041	80.7917
M11Jul2008	2008	Jul	M11	1	1.9	2.4	9.9	28.6	5.04	34.8	8.31	28.5	5.34	34.8	8.31	0	28	19.384	14.22	79.315
M11Jul2008	2008	Jul	M11	2	1.9	2.4	9.9	28.6	5.04	34.8	8.31	28.5	5.34	34.8	8.31	0	28	19.384	14.22	79.315
M11Jul2008	2008	Jul	M11	3	1.9	2.4	9.9	28.6	5.04	34.8	8.31	28.5	5.34	34.8	8.31	0	28	19.384	14.22	79.315
M12Jul2008	2008	Jul	M12	1	1.6	3.6	9.9	27.8	5.59	27.3	8.08	27.6	5.53	29.3	8.12	0	28.9	17.628	15.051	165.017
M12Jul2008	2008	Jul	M12	2	1.6	3.6	9.9	27.8	5.59	27.3	8.08	27.6	5.53	29.3	8.12	0	28.9	17.628	15.051	165.017
M12Jul2008	2008	Jul	M12	3	1.6	3.6	9.9	27.8	5.59	27.3	8.08	27.6	5.53	29.3	8.12	0	28.9	17.628	15.051	165.017
M13Jul2008	2008	Jul	M13	1	1.1	2.2	9.9	28.7	6.48	31.5	8.31	28.7	7.11	31.7	8.37	0	28.9	18.061	8.666	183.167
M13Jul2008	2008	Jul	M13	2	1.1	2.2	9.9	28.7	6.48	31.5	8.31	28.7	7.11	31.7	8.37	0	28.9	18.061	8.666	183.167
M13Jul2008	2008	Jul	M13	3	1.1	2.2	9.9	28.7	6.48	31.5	8.31	28.7	7.11	31.7	8.37	0	28.9	18.061	8.666	183.167
M14Jul2008	2008	Jul	M14	1	1.9	8.3	0.6	28.9	3.53	1.4	7.48	28.4	2.47	2.7	7.33	1	31.6	18.237	12.028	91.1083
M14Jul2008	2008	Jul	M14	2	1.9	8.3	0.6	28.9	3.53	1.4	7.48	28.4	2.47	2.7	7.33	1	31.6	18.237	12.028	91.1083
M14Jul2008	2008	Jul	M14	3	1.9	8.3	0.6	28.9	3.53	1.4	7.48	28.4	2.47	2.7	7.33	1	31.6	18.237	12.028	91.1083
M15Jul2008	2008	Jul	M15	1	1.9	5.8	0.8	27.4	4.29	0.5	7.31	26.5	2.86	0.5	7.27	0	28.8	15.629	10.443	111.3
M15Jul2008	2008	Jul	M15	2	1.9	5.8	0.8	27.4	4.29	0.5	7.31	26.5	2.86	0.5	7.27	0	28.8	15.629	10.443	111.3
M15Jul2008	2008	Jul	M15	3	1.9	5.8	0.8	27.4	4.29	0.5	7.31	26.5	2.86	0.5	7.27	0	28.8	15.629	10.443	111.3
M01Oct2008	2008	Oct	M01	1	1.6	8.5	1	26.04	3.59	0.6	7.22	26.04	3.55	0.6	7.2	0	25.6	3.624	3.823	114
M01Oct2008	2008	Oct	M01	2	1.6	8.5	1	26.04	3.59	0.6	7.22	26.04	3.55	0.6	7.2	0	25.6	3.624	3.823	114
M01Oct2008	2008	Oct	M01	3	1.6	8.5	1	26.04	3.59	0.6	7.22	26.04	3.55	0.6	7.2	0	25.6	3.624	3.823	114
M02Oct2008	2008	Oct	M02	1	1.9	5.3	1	26.4	4.08	0.5	7.38	26.4	3.97	0.5	7.42	1	22.4	4.165	6.229	192.6
M02Oct2008	2008	Oct	M02	2	1.9	5.3	1	26.4	4.08	0.5	7.38	26.4	3.97	0.5	7.42	1	22.4	4.165	6.229	192.6
M02Oct2008	2008	Oct	M02	3	1.9	5.3	1	26.4	4.08	0.5	7.38	26.4	3.97	0.5	7.42	1	22.4	4.165	6.229	192.6
M03Oct2008	2008	Oct	M03	1	3.2	3	1.2	27.4	5.66	5.4	7.45	27.8	9.2	7.06	7.45	1	25.5	8.697	6.386	274.057
M03Oct2008	2008	Oct	M03	2	3.2	3	1.2	27.4	5.66	5.4	7.45	27.8	9.2	7.06	7.45	1	25.5	8.697	6.386	274.057
M03Oct2008	2008	Oct	M03	3	3.2	3	1.2	27.4	5.66	5.4	7.45	27.8	9.2	7.06	7.45	1	25.5	8.697	6.386	274.057
M04Oct2008	2008	Oct	M04	1	2.1	19.2	0.5	28	6.01	1.4	7.32	27.7	4.24	9.4	7.23	1	27.1	3.259	4.918	294.824
M04Oct2008	2008	Oct	M04	2	2.1	19.2	0.5	28	6.01	1.4	7.32	27.7	4.24	9.4	7.23	1	27.1	3.259	4.918	294.824
M04Oct2008	2008	Oct	M04	3	2.1	19.2	0.5	28	6.01	1.4	7.32	27.7	4.24	9.4	7.23	1	27.1	3.259	4.918	294.824
M06Oct2008	2008	Oct	M06	1	3.1	6.3	1	26.8	6.12	10.2	7.57	27.7	4.91	25.2	7.41	0	24.3	16.2417	12.3708	209.514
M06Oct2008	2008	Oct	M06	2	3.1	6.3	1	26.8	6.12	10.2	7.57	27.7	4.91	25.2	7.41	0	24.3	16.2417	12.3708	209.514
M06Oct2008	2008	Oct	M06	3	3.1	6.3	1	26.8	6.12	10.2	7.57	27.7	4.91	25.2	7.41	0	24.3	16.2417	12.3708	209.514
M07Oct2008	2008	Oct	M07	1	2.3	5.6	1.1	26.9	5.84	18.9	7.72	27.4	5.75	29.6	7.84	0	23.7	17.0507	16.8917	85.2171
M07Oct2008	2008	Oct	M07	2	2.3	5.6	1.1	26.9	5.84	18.9	7.72	27.4	5.75	29.6	7.84	0	23.7	17.0507	16.8917	85.2171
M07Oct2008	2008	Oct	M07	3	2.3	5.6	1.1	26.9	5.84	18.9	7.72	27.4	5.75	29.6	7.84	0	23.7	17.0507	16.8917	85.2171
M08Oct2008	2008	Oct	M08	1	1.6	6.8	1	27	5.21	23.6	7.77	27.1	3.5	26.1	7.45	0	22.7	2.1514	2.4991	108.817
M08Oct2008	2008	Oct	M08	2	1.6	6.8	1	27	5.21	23.6	7.77	27.1	3.5	26.1	7.45	0	22.7	2.1514	2.4991	108.817
M08Oct2008	2008	Oct	M08	3	1.6	6.8	1	27	5.21	23.6	7.77	27.1	3.5	26.1	7.45	0	22.7	2.1514	2.4991	108.817
M09Oct2008	2008	Oct	M09	1	1.8	5.9	1.3	26.6	6.44	29.5	7.85	27.1	5.2	32.1	7.81	0	22.9	17.2726	14.7312	178.814
M09Oct2008	2008	Oct	M09	2	1.8	5.9	1.3	26.6	6.44	29.5	7.85	27.1	5.2	32.1	7.81	0	22.9	17.2726	14.7312	178.814
M09Oct2008	2008	Oct	M09	3	1.8	5.9	1.3	26.6	6.44	29.5	7.85	27.1	5.2	32.1	7.81	0	22.9	17.2726	14.7312	178.814
M10Oct2008	2008	Oct	M10	1	1.8	5.1	1.4	26.6	5	27	7.73	26.5	4.8	27.9	7.73	0	24.7	14.8598	10.4439	80.7917
M10Oct2008	2008	Oct	M10	2	1.8	5.1	1.4	26.6	5	27	7.73	26.5	4.8	27.9	7.73	0	24.7	14.8598	10.4439	80.7917
M10Oct2008	2008	Oct	M10	3	1.8	5.1	1.4	26.6	5	27	7.73	26.5	4.8	27.9	7.73	0	24.7	14.8598	10.4439	80.7917
M11Oct2008	2008	Oct	M11	1	2.3	9.8	1	27.1	6.68	29.7	8.16	26.9	6.34	29.6	8.15	0	31.3	16.9307	15.1903	79.315
M11Oct2008	2008	Oct	M11	2	2.3	9.8	1	27.1	6.68	29.7	8.16	26.9	6.34	29.6	8.15	0	31.3	16.9307	15.1903	79.315
M11Oct2008	2008	Oct	M11	3	2.3	9.8	1	27.1	6.68	29.7	8.16	26.9	6.34	29.6	8.15	0	31.3	16.9307	15.1903	79.315
M12Oct2008	2008	Oct	M12	1	2	6.5	1.2	28.2	5.88	34.2	8.02	27.9	5.77	36.7	8.18	0	26.3	16.8832	15.44	165.017
M12Oct2008	2008	Oct	M12	2	2	6.5	1.2	28.2	5.88	34.2	8.02	27.9	5.77	36.7	8.18	0	26.3	16.8832	15.44	165.017
M12Oct2008	2008	Oct	M12	3	2	6.5	1.2	28.2	5.88	34.2	8.02	27.9	5.77	36.7	8.18	0	26.3	16.8832	15.44	165.017
M13Oct2008	2008	Oct	M13	1	1.7	4.8	1.3	27.5	5.07	26.2	7.76	27.2	4.62	29.2	7.76	0	26.4	15.6898	15.5348	183.167
M13Oct2008	2008	Oct	M13	2	1.7	4.8	1.3	27.5	5.07	26.2	7.76	27.2	4.62	29.2	7.76	0	26.4	15.6898	15.5348	183.167
M13Oct2008	2008	Oct	M13	3	1.7	4.8	1.3	27.5	5.07	26.2	7.76	27.2	4.62	29.2	7.76	0	26.4	15.6898	15.5348	183.167
M14Oct2008	2008	Oct	M14	1	2.1	20.8	0.5	27.2	6.03	0.3	7.3	26.6	5.63	0.3	7.15	1	27.1	7.7902	8.5588	91.1083
M14Oct2008	2008	Oct	M14	2	2.1	20.8	0.5	27.2	6.03	0.3	7.3	26.6	5.63	0.3	7.15	1	27.1	7.7902	8.5588	91.1083
M14Oct2008	2008	Oct	M14	3	2.1	20.8	0.5	27.2	6.03	0.3	7.3	26.6	5.63	0.3	7.15	1	27.1	7.7902	8.5588	91.1083
M02Jan2009	2009	Jan	M02	1	1.8	3.58	1.3	22.1	6.15	11.15	7.64	22.39	4.87	12.04	7.59	1	21.6	3.7225	2.2064	192.6
M02Jan2009	2009	Jan	M02	2	1.8	3.58	1.3	22.1	6.15	11.15	7.64	22.39	4.87	12.04	7.59	1	21.6	3.7225	2.2064	192.6
M02Jan2009	2009	Jan	M02	3	1.8	3.58	1.3	22.1	6.15	11.15	7.64	22.39	4.87	12.04	7.59	1	21.6	3.7225	2.2064	192.6
M03Jan2009	2009	Jan	M03	1	2.7	2.43	2	22.28	8.07	15.25	7.98	21.46	5.86	18.64	7.77	1	25.5	14.1102	14.9989	274.057
M03Jan2009	2009	Jan	M03	2	2.7	2.43	2	22.28	8.07	15.25	7.98	21.46	5.86	18.64	7.77	1	25.5	14.1102	14.9989	274.057
M03Jan2009	2009	Jan	M03	3	2.7	2.43	2	22.28	8.07	15.25	7.98	21.46	5.86	18.64	7.77	1	25.5	14.1102	14.9989	274.057
M04Jan2009	2009	Jan	M04	1	1.5	7.1	0.9	22.99	7.65	15.5	7.87	21.88	6.59	19.91	7.78	1	25.7	18.3043	3.4873	294.824
M04Jan2009	2009	Jan	M04	2	1.5	7.1	0.9	22.99	7.65	15.5	7.87	21.88	6.59	19.91	7.78	1	25.7	18.3043	3.4873	294.824
M04Jan2009	2009	Jan	M04	3	1.5	7.1	0.9	22.99	7.65	15.5	7.87	21.88	6.59	19.91	7.78	1	25.7	18.3043	3.4873	294.824
M05Jan2009	2009	Jan	M05	1	2	4.3	1.2	21.71	7.15	19.19	7.87	21.81	6.06	26.23	7.9	1	24.8	0	0	205.9
M05Jan2009	2009	Jan	M05	2	2	4.3	1.2	21.71	7.15	19.19	7.87	21.81	6.06	26.23	7.9	1	24.8	0	0	205.9
M05Jan2009	2009	Jan	M05	3	2	4.3	1.2	21.71	7.15	19.19	7.87	21.81	6.06	26.23	7.9	1	24.8	0	0	205.9
M06Jan2009	2009	Jan	M06	1	2.6	3.43	1.4	21.56	7.38	23.72	7.94	21.84	6.38	30.57	7.93	0	23.4	3.479	1.805	209.514
M06Jan2009	2009	Jan	M06	2	2.6	3.43	1.4	21.56	7.38	23.72	7.94	21.84	6.38	30.57	7.93	0	23.4	3.479	1.805	209.514
M06Jan2009	2009	Jan	M06	3	2.6	3.43	1.4	21.56	7.38	23.72	7.94	21.84	6.38	30.57	7.93	0	23.4	3.479	1.805	209.514
M07Jan2009	2009	Jan	M07	1	1.8	5.96	1.3	22.27	6.69	34.08	8.05	22.4	6.53	35.34	8.07	0	24	3.33	2.127	85.2171
M07Jan2009	2009	Jan	M07	2	1.8	5.96	1.3	22.27	6.69	34.08	8.05	22.4	6.53	35.34	8.07	0	24	3.33	2.127	85.2171
M07Jan2009	2009	Jan	M07	3	1.8	5.96	1.3	22.27	6.69	34.08	8.05	22.4	6.53	35.34	8.07	0	24	3.33	2.127	85.2171
M08Jan2009	2009	Jan	M08	1	1.2	6.44	1	21.68	6.49	32.93	7.89	21.68	6.37	33.02	7.88	0	21.8	3.183	2.691	108.817
M08Jan2009	2009	Jan	M08	2	1.2	6.44	1	21.68	6.49	32.93	7.89	21.68	6.37	33.02	7.88	0	21.8	3.183	2.691	108.817
M08Jan2009	2009	Jan	M08	3	1.2	6.44	1	21.68	6.49	32.93	7.89	21.68	6.37	33.02	7.88	0	21.8	3.183	2.691	108.817
M09Jan2009	2009	Jan	M09	1	1.4	6	1.3	21.85	6.76	34.7	8.05	21.85	6.52	34.71	8.05	0	22.4	4.768	4.487	178.814
M09Jan2009	2009	Jan	M09	2	1.4	6	1.3	21.85	6.76	34.7	8.05	21.85	6.52	34.71	8.05	0	22.4	4.768	4.487	178.814
M09Jan2009	2009	Jan	M09	3	1.4	6	1.3	21.85	6.76	34.7	8.05	21.85	6.52	34.71	8.05	0	22.4	4.768	4.487	178.814
M10Jan2009	2009	Jan	M10	1	1.5	5.87	1.4	18.2	7.45	35.8	8.04	18.2	7.26	35	8.05	0	14.2	1.925	1.625	80.7917
M10Jan2009	2009	Jan	M10	2	1.5	5.87	1.4	18.2	7.45	35.8	8.04	18.2	7.26	35	8.05	0	14.2	1.925	1.625	80.7917
M10Jan2009	2009	Jan	M10	3	1.5	5.87	1.4	18.2	7.45	35.8	8.04	18.2	7.26	35	8.05	0	14.2	1.925	1.625	80.7917
M11Jan2009	2009	Jan	M11	1	1.6	17.4	0.6	19.78	7.33	34.71	8.13	19.75	7.15	34.72	8.13	0	19.1	2.584	3.605	79.315
M11Jan2009	2009	Jan	M11	2	1.6	17.4	0.6	19.78	7.33	34.71	8.13	19.75	7.15	34.72	8.13	0	19.1	2.584	3.605	79.315
M11Jan2009	2009	Jan	M11	3	1.6	17.4	0.6	19.78	7.33	34.71	8.13	19.75	7.15	34.72	8.13	0	19.1	2.584	3.605	79.315
M12Jan2009	2009	Jan	M12	1	1.1	9.69	9.9	22.66	6.41	35.06	8.01	22.64	6.43	35.08	8.02	0	25.9	2.661	2.149	165.017
M12Jan2009	2009	Jan	M12	2	1.1	9.69	9.9	22.66	6.41	35.06	8.01	22.64	6.43	35.08	8.02	0	25.9	2.661	2.149	165.017
M12Jan2009	2009	Jan	M12	3	1.1	9.69	9.9	22.66	6.41	35.06	8.01	22.64	6.43	35.08	8.02	0	25.9	2.661	2.149	165.017
M13Jan2009	2009	Jan	M13	1	1	11.6	0.9	22.32	6.41	34.81	8.01	22.32	6.48	34.82	8.01	0	25.5	1.629	1.433	183.167
M13Jan2009	2009	Jan	M13	2	1	11.6	0.9	22.32	6.41	34.81	8.01	22.32	6.48	34.82	8.01	0	25.5	1.629	1.433	183.167
M13Jan2009	2009	Jan	M13	3	1	11.6	0.9	22.32	6.41	34.81	8.01	22.32	6.48	34.82	8.01	0	25.5	1.629	1.433	183.167
M14Jan2009	2009	Jan	M14	1	0	6.66	0.9	22.4	8.27	7.81	7.92	21.92	5.52	13.79	7.64	0	26.2	1.873	2.02	91.1083
M14Jan2009	2009	Jan	M14	2	0	6.66	0.9	22.4	8.27	7.81	7.92	21.92	5.52	13.79	7.64	0	26.2	1.873	2.02	91.1083
M14Jan2009	2009	Jan	M14	3	0	6.66	0.9	22.4	8.27	7.81	7.92	21.92	5.52	13.79	7.64	0	26.2	1.873	2.02	91.1083
M15Jan2009	2009	Jan	M15	1	1.8	7.13	0.9	20.72	7.08	0.91	7.65	20.6	6.85	0.92	7.6	0	23.8	1.812	1.582	111.3
M15Jan2009	2009	Jan	M15	2	1.8	7.13	0.9	20.72	7.08	0.91	7.65	20.6	6.85	0.92	7.6	0	23.8	1.812	1.582	111.3
M15Jan2009	2009	Jan	M15	3	1.8	7.13	0.9	20.72	7.08	0.91	7.65	20.6	6.85	0.92	7.6	0	23.8	1.812	1.582	111.3
M01Apr2009	2009	Apr	M01	1	1.7	7	1.5	26.1	5.61	4.7	7.73	26	5.67	4.8	7.71	0	25.7	2.361	2.143	114
M01Apr2009	2009	Apr	M01	2	1.7	7	1.5	26.1	5.61	4.7	7.73	26	5.67	4.8	7.71	0	25.7	2.361	2.143	114
M01Apr2009	2009	Apr	M01	3	1.7	7	1.5	26.1	5.61	4.7	7.73	26	5.67	4.8	7.71	0	25.7	2.361	2.143	114
M02Apr2009	2009	Apr	M02	1	2.2	4	1.2	26.2	4.56	17	7.53	26.4	4.45	19.4	7.57	1	23.1	2.175	2.214	192.6
M02Apr2009	2009	Apr	M02	2	2.2	4	1.2	26.2	4.56	17	7.53	26.4	4.45	19.4	7.57	1	23.1	2.175	2.214	192.6
M02Apr2009	2009	Apr	M02	3	2.2	4	1.2	26.2	4.56	17	7.53	26.4	4.45	19.4	7.57	1	23.1	2.175	2.214	192.6
M03Apr2009	2009	Apr	M03	1	2.7	1.7	1.8	24.4	6.68	23.1	7.9	24.7	5.48	24.7	7.73	1	23.5	1.954	1.257	274.057
M03Apr2009	2009	Apr	M03	2	2.7	1.7	1.8	24.4	6.68	23.1	7.9	24.7	5.48	24.7	7.73	1	23.5	1.954	1.257	274.057
M03Apr2009	2009	Apr	M03	3	2.7	1.7	1.8	24.4	6.68	23.1	7.9	24.7	5.48	24.7	7.73	1	23.5	1.954	1.257	274.057
M04Apr2009	2009	Apr	M04	1	1.6	2.8	1.3	24.9	5.2	20.9	7.73	25	5.12	25.5	7.71	1	25.8	1.989	1.847	294.824
M04Apr2009	2009	Apr	M04	2	1.6	2.8	1.3	24.9	5.2	20.9	7.73	25	5.12	25.5	7.71	1	25.8	1.989	1.847	294.824
M04Apr2009	2009	Apr	M04	3	1.6	2.8	1.3	24.9	5.2	20.9	7.73	25	5.12	25.5	7.71	1	25.8	1.989	1.847	294.824
M05Apr2009	2009	Apr	M05	1	2	2.4	1.7	25	6.12	25.1	7.86	24.9	5.3	28.6	7.89	1	25.6	2.547	2.041	205.9
M05Apr2009	2009	Apr	M05	2	2	2.4	1.7	25	6.12	25.1	7.86	24.9	5.3	28.6	7.89	1	25.6	2.547	2.041	205.9
M05Apr2009	2009	Apr	M05	3	2	2.4	1.7	25	6.12	25.1	7.86	24.9	5.3	28.6	7.89	1	25.6	2.547	2.041	205.9
M06Apr2009	2009	Apr	M06	1	2.4	3.9	1.5	25.1	6.23	28.6	7.93	24.6	5.87	30.1	7.94	1	26.1	0.853	0.87	209.514
M06Apr2009	2009	Apr	M06	2	2.4	3.9	1.5	25.1	6.23	28.6	7.93	24.6	5.87	30.1	7.94	1	26.1	0.853	0.87	209.514
M06Apr2009	2009	Apr	M06	3	2.4	3.9	1.5	25.1	6.23	28.6	7.93	24.6	5.87	30.1	7.94	1	26.1	0.853	0.87	209.514
M07Apr2009	2009	Apr	M07	1	1.8	6.5	1.4	25.1	6.16	34.2	8.05	25.1	5.91	34.2	8.05	0	28.6	1.127	0.779	85.2171
M07Apr2009	2009	Apr	M07	2	1.8	6.5	1.4	25.1	6.16	34.2	8.05	25.1	5.91	34.2	8.05	0	28.6	1.127	0.779	85.2171
M07Apr2009	2009	Apr	M07	3	1.8	6.5	1.4	25.1	6.16	34.2	8.05	25.1	5.91	34.2	8.05	0	28.6	1.127	0.779	85.2171
M08Apr2009	2009	Apr	M08	1	1.2	11.4	0.8	25.9	5.54	34.9	7.97	25.9	5.47	35.1	7.97	0	27.1	1.902	1.802	108.817
M08Apr2009	2009	Apr	M08	2	1.2	11.4	0.8	25.9	5.54	34.9	7.97	25.9	5.47	35.1	7.97	0	27.1	1.902	1.802	108.817
M08Apr2009	2009	Apr	M08	3	1.2	11.4	0.8	25.9	5.54	34.9	7.97	25.9	5.47	35.1	7.97	0	27.1	1.902	1.802	108.817
M09Apr2009	2009	Apr	M09	1	1.6	6.7	9.9	24.9	5.89	35.7	8.08	24.9	5.63	35.7	8.08	0	28.5	1.337	0.942	178.814
M09Apr2009	2009	Apr	M09	2	1.6	6.7	9.9	24.9	5.89	35.7	8.08	24.9	5.63	35.7	8.08	0	28.5	1.337	0.942	178.814
M09Apr2009	2009	Apr	M09	3	1.6	6.7	9.9	24.9	5.89	35.7	8.08	24.9	5.63	35.7	8.08	0	28.5	1.337	0.942	178.814
M10Apr2009	2009	Apr	M10	1	1.4	9.1	1	25.7	5.49	36.1	7.79	25.7	5.39	36.2	7.97	0	28.1	1.703	2.078	80.7917
M10Apr2009	2009	Apr	M10	2	1.4	9.1	1	25.7	5.49	36.1	7.79	25.7	5.39	36.2	7.97	0	28.1	1.703	2.078	80.7917
M10Apr2009	2009	Apr	M10	3	1.4	9.1	1	25.7	5.49	36.1	7.79	25.7	5.39	36.2	7.97	0	28.1	1.703	2.078	80.7917
M11Apr2009	2009	Apr	M11	1	2	13	1	25.9	5.76	36.4	8.04	25.9	5.63	36.4	8.03	0	28.7	1.561	1.428	79.315
M11Apr2009	2009	Apr	M11	2	2	13	1	25.9	5.76	36.4	8.04	25.9	5.63	36.4	8.03	0	28.7	1.561	1.428	79.315
M11Apr2009	2009	Apr	M11	3	2	13	1	25.9	5.76	36.4	8.04	25.9	5.63	36.4	8.03	0	28.7	1.561	1.428	79.315
M12Apr2009	2009	Apr	M12	1	1.8	7.8	1.3	20.8	5.13	37.9	8.19	20.8	5.32	37.9	8.19	0	9.6	2.029	1.385	165.017
M12Apr2009	2009	Apr	M12	2	1.8	7.8	1.3	20.8	5.13	37.9	8.19	20.8	5.32	37.9	8.19	0	9.6	2.029	1.385	165.017
M12Apr2009	2009	Apr	M12	3	1.8	7.8	1.3	20.8	5.13	37.9	8.19	20.8	5.32	37.9	8.19	0	9.6	2.029	1.385	165.017
M13Apr2009	2009	Apr	M13	1	1.3	6	9.9	19.3	5.34	37.9	8.22	19.3	5.01	37.9	8.24	0	8.2	2.3311	1.8657	183.167
M13Apr2009	2009	Apr	M13	2	1.3	6	9.9	19.3	5.34	37.9	8.22	19.3	5.01	37.9	8.24	0	8.2	2.3311	1.8657	183.167
M13Apr2009	2009	Apr	M13	3	1.3	6	9.9	19.3	5.34	37.9	8.22	19.3	5.01	37.9	8.24	0	8.2	2.3311	1.8657	183.167
M14Apr2009	2009	Apr	M14	1	1.8	5.09	0.8	24.9	4.15	12.8	7.69	25.1	5.9	21.7	7.6	1	24.8	1.8676	1.6671	91.1083
M14Apr2009	2009	Apr	M14	2	1.8	5.09	0.8	24.9	4.15	12.8	7.69	25.1	5.9	21.7	7.6	1	24.8	1.8676	1.6671	91.1083
M14Apr2009	2009	Apr	M14	3	1.8	5.09	0.8	24.9	4.15	12.8	7.69	25.1	5.9	21.7	7.6	1	24.8	1.8676	1.6671	91.1083
M01Jul2009	2009	Jul	M01	1	1.1	7.7	0.7	31	3.89	0.6	7.45	31	3.88	0.6	7.29	1	32.9	1.4752	1.2763	114
M01Jul2009	2009	Jul	M01	2	1.1	7.7	0.7	31	3.89	0.6	7.45	31	3.88	0.6	7.29	1	32.9	1.4752	1.2763	114
M01Jul2009	2009	Jul	M01	3	1.1	7.7	0.7	31	3.89	0.6	7.45	31	3.88	0.6	7.29	1	32.9	1.4752	1.2763	114
M02Jul2009	2009	Jul	M02	1	1.1	9.92	9.9	31	3.89	1.1	7.54	30.9	3.6	1.1	7.51	0	32.7	1.3926	1.1944	192.6
M02Jul2009	2009	Jul	M02	2	1.1	9.92	9.9	31	3.89	1.1	7.54	30.9	3.6	1.1	7.51	0	32.7	1.3926	1.1944	192.6
M02Jul2009	2009	Jul	M02	3	1.1	9.92	9.9	31	3.89	1.1	7.54	30.9	3.6	1.1	7.51	0	32.7	1.3926	1.1944	192.6
M03Jul2009	2009	Jul	M03	1	3	3.13	1.1	29.9	5.4	7.1	7.87	29.8	1.52	15	7.1	1	29.2	1.8797	1.9194	274.057
M03Jul2009	2009	Jul	M03	2	3	3.13	1.1	29.9	5.4	7.1	7.87	29.8	1.52	15	7.1	1	29.2	1.8797	1.9194	274.057
M03Jul2009	2009	Jul	M03	3	3	3.13	1.1	29.9	5.4	7.1	7.87	29.8	1.52	15	7.1	1	29.2	1.8797	1.9194	274.057
M04Jul2009	2009	Jul	M04	1	1.8	6.23	1	29.8	4.25	14.2	7.73	29.9	3.32	15.9	7.23	1	28.7	1.5671	1.5536	294.824
M04Jul2009	2009	Jul	M04	2	1.8	6.23	1	29.8	4.25	14.2	7.73	29.9	3.32	15.9	7.23	1	28.7	1.5671	1.5536	294.824
M04Jul2009	2009	Jul	M04	3	1.8	6.23	1	29.8	4.25	14.2	7.73	29.9	3.32	15.9	7.23	1	28.7	1.5671	1.5536	294.824
M05Jul2009	2009	Jul	M05	1	2.3	5.37	1	29.6	5.43	18	7.94	28.7	2.87	24.4	7.25	1	29.6	2.3307	1.5568	205.9
M05Jul2009	2009	Jul	M05	2	2.3	5.37	1	29.6	5.43	18	7.94	28.7	2.87	24.4	7.25	1	29.6	2.3307	1.5568	205.9
M05Jul2009	2009	Jul	M05	3	2.3	5.37	1	29.6	5.43	18	7.94	28.7	2.87	24.4	7.25	1	29.6	2.3307	1.5568	205.9
M06Jul2009	2009	Jul	M06	1	2.9	4.88	1.3	29.5	6.06	19.7	8.02	28	4.11	27.2	7.58	0	29.9	2.5046	1.8672	209.514
M06Jul2009	2009	Jul	M06	2	2.9	4.88	1.3	29.5	6.06	19.7	8.02	28	4.11	27.2	7.58	0	29.9	2.5046	1.8672	209.514
M06Jul2009	2009	Jul	M06	3	2.9	4.88	1.3	29.5	6.06	19.7	8.02	28	4.11	27.2	7.58	0	29.9	2.5046	1.8672	209.514
M07Jul2009	2009	Jul	M07	1	1.2	4.12	9.9	27.5	4.38	32.6	7.9	27.2	4.34	33.1	7.91	0	30.5	1.3874	1.5469	85.2171
M07Jul2009	2009	Jul	M07	2	1.2	4.12	9.9	27.5	4.38	32.6	7.9	27.2	4.34	33.1	7.91	0	30.5	1.3874	1.5469	85.2171
M07Jul2009	2009	Jul	M07	3	1.2	4.12	9.9	27.5	4.38	32.6	7.9	27.2	4.34	33.1	7.91	0	30.5	1.3874	1.5469	85.2171
M08Jul2009	2009	Jul	M08	1	1.2	6.9	1	30.5	3.66	31.8	7.65	31.8	3.56	31.8	7.56	0	31.5	1.4745	1.7255	108.817
M08Jul2009	2009	Jul	M08	2	1.2	6.9	1	30.5	3.66	31.8	7.65	31.8	3.56	31.8	7.56	0	31.5	1.4745	1.7255	108.817
M08Jul2009	2009	Jul	M08	3	1.2	6.9	1	30.5	3.66	31.8	7.65	31.8	3.56	31.8	7.56	0	31.5	1.4745	1.7255	108.817
M09Jul2009	2009	Jul	M09	1	1.5	2.44	9.9	27.9	4.33	33.1	7.93	27.8	4.41	33.3	7.88	0	30.2	2.009	1.9643	178.814
M09Jul2009	2009	Jul	M09	2	1.5	2.44	9.9	27.9	4.33	33.1	7.93	27.8	4.41	33.3	7.88	0	30.2	2.009	1.9643	178.814
M09Jul2009	2009	Jul	M09	3	1.5	2.44	9.9	27.9	4.33	33.1	7.93	27.8	4.41	33.3	7.88	0	30.2	2.009	1.9643	178.814
M11Jul2009	2009	Jul	M11	1	2	1.05	9.9	29.98	5.51	34.34	8.39	29.96	4.77	34.34	8.38	1	29.5	1.4552	1.3472	79.315
M11Jul2009	2009	Jul	M11	2	2	1.05	9.9	29.98	5.51	34.34	8.39	29.96	4.77	34.34	8.38	1	29.5	1.4552	1.3472	79.315
M11Jul2009	2009	Jul	M11	3	2	1.05	9.9	29.98	5.51	34.34	8.39	29.96	4.77	34.34	8.38	1	29.5	1.4552	1.3472	79.315
M12Jul2009	2009	Jul	M12	1	1.5	1.97	9.9	26.47	5.98	34.16	8.15	25.87	5.87	35.07	8.17	0	31	7.275	6.4	165.017
M12Jul2009	2009	Jul	M12	2	1.5	1.97	9.9	26.47	5.98	34.16	8.15	25.87	5.87	35.07	8.17	0	31	7.275	6.4	165.017
M12Jul2009	2009	Jul	M12	3	1.5	1.97	9.9	26.47	5.98	34.16	8.15	25.87	5.87	35.07	8.17	0	31	7.275	6.4	165.017
M13Jul2009	2009	Jul	M13	1	1.5	2.93	9.9	28.99	4.9	30.38	8.14	28.86	4.46	30.56	8.13	0	30.2	2.949	2.704	183.167
M13Jul2009	2009	Jul	M13	2	1.5	2.93	9.9	28.99	4.9	30.38	8.14	28.86	4.46	30.56	8.13	0	30.2	2.949	2.704	183.167
M13Jul2009	2009	Jul	M13	3	1.5	2.93	9.9	28.99	4.9	30.38	8.14	28.86	4.46	30.56	8.13	0	30.2	2.949	2.704	183.167
M14Jul2009	2009	Jul	M14	1	1.1	4.22	1	30.2	3.89	8.6	7.7	30	3.45	8.8	7.51	0	28.1	4.675	2.924	91.1083
M14Jul2009	2009	Jul	M14	2	1.1	4.22	1	30.2	3.89	8.6	7.7	30	3.45	8.8	7.51	0	28.1	4.675	2.924	91.1083
M14Jul2009	2009	Jul	M14	3	1.1	4.22	1	30.2	3.89	8.6	7.7	30	3.45	8.8	7.51	0	28.1	4.675	2.924	91.1083
M15Jul2009	2009	Jul	M15	1	1.7	5.62	0.8	31.5	4.39	0.6	7.53	29.6	2.53	0.6	7.46	0	33	4.82	2.729	111.3
M15Jul2009	2009	Jul	M15	2	1.7	5.62	0.8	31.5	4.39	0.6	7.53	29.6	2.53	0.6	7.46	0	33	4.82	2.729	111.3
M15Jul2009	2009	Jul	M15	3	1.7	5.62	0.8	31.5	4.39	0.6	7.53	29.6	2.53	0.6	7.46	0	33	4.82	2.729	111.3
M11Oct2009	2009	Oct	M11	1	2.1	0	1.2	28.25	5.37	31.25	8.18	28.21	5.28	31.26	8.18	0	28.2	2.263	1.38	79.315
M11Oct2009	2009	Oct	M11	2	2.1	0	1.2	28.25	5.37	31.25	8.18	28.21	5.28	31.26	8.18	0	28.2	2.263	1.38	79.315
M11Oct2009	2009	Oct	M11	3	2.1	0	1.2	28.25	5.37	31.25	8.18	28.21	5.28	31.26	8.18	0	28.2	2.263	1.38	79.315
M02Sept2009	2009	Sept	M02	1	2	0.1	1.5	29.6	3.92	2.2	7.53	29.6	3.11	4.3	7.45	0	28.3	2.827	2.121	192.6
M02Sept2009	2009	Sept	M02	2	2	0.1	1.5	29.6	3.92	2.2	7.53	29.6	3.11	4.3	7.45	0	28.3	2.827	2.121	192.6
M02Sept2009	2009	Sept	M02	3	2	0.1	1.5	29.6	3.92	2.2	7.53	29.6	3.11	4.3	7.45	0	28.3	2.827	2.121	192.6
M03Sept2009	2009	Sept	M03	1	3.2	1.5	1.3	29.2	6.71	6.2	7.77	30.6	4.21	14.7	7.66	1	25.1	1.916	1.627	274.057
M03Sept2009	2009	Sept	M03	2	3.2	1.5	1.3	29.2	6.71	6.2	7.77	30.6	4.21	14.7	7.66	1	25.1	1.916	1.627	274.057
M03Sept2009	2009	Sept	M03	3	3.2	1.5	1.3	29.2	6.71	6.2	7.77	30.6	4.21	14.7	7.66	1	25.1	1.916	1.627	274.057
M05Sept2009	2009	Sept	M05	1	2.7	2.7	1.3	29.1	6.24	11.9	7.8	30.3	4.02	23.7	7.79	0	24.9	1.604	1.414	205.9
M05Sept2009	2009	Sept	M05	2	2.7	2.7	1.3	29.1	6.24	11.9	7.8	30.3	4.02	23.7	7.79	0	24.9	1.604	1.414	205.9
M05Sept2009	2009	Sept	M05	3	2.7	2.7	1.3	29.1	6.24	11.9	7.8	30.3	4.02	23.7	7.79	0	24.9	1.604	1.414	205.9
M06Sept2009	2009	Sept	M06	1	2.9	2.4	1.4	29	6.86	15.9	7.91	30.1	5.4	28.3	7.99	0	25.4	3.003	1.599	209.514
M06Sept2009	2009	Sept	M06	2	2.9	2.4	1.4	29	6.86	15.9	7.91	30.1	5.4	28.3	7.99	0	25.4	3.003	1.599	209.514
M06Sept2009	2009	Sept	M06	3	2.9	2.4	1.4	29	6.86	15.9	7.91	30.1	5.4	28.3	7.99	0	25.4	3.003	1.599	209.514
M07Sept2009	2009	Sept	M07	1	1.9	2.9	9.9	29.3	6.31	30.2	8.06	29.4	5.89	32.7	8.08	0	25.6	1.797	1.181	85.2171
M07Sept2009	2009	Sept	M07	2	1.9	2.9	9.9	29.3	6.31	30.2	8.06	29.4	5.89	32.7	8.08	0	25.6	1.797	1.181	85.2171
M07Sept2009	2009	Sept	M07	3	1.9	2.9	9.9	29.3	6.31	30.2	8.06	29.4	5.89	32.7	8.08	0	25.6	1.797	1.181	85.2171
M08Sept2009	2009	Sept	M08	1	1.3	5.9	1	29.6	5.36	27.1	7.74	29.7	4.67	27.5	7.66	0	26.4	1.596	0.891	108.817
M08Sept2009	2009	Sept	M08	2	1.3	5.9	1	29.6	5.36	27.1	7.74	29.7	4.67	27.5	7.66	0	26.4	1.596	0.891	108.817
M08Sept2009	2009	Sept	M08	3	1.3	5.9	1	29.6	5.36	27.1	7.74	29.7	4.67	27.5	7.66	0	26.4	1.596	0.891	108.817
M09Sept2009	2009	Sept	M09	1	1.7	7.2	1.4	29.1	7.05	29.7	8.12	29.3	4.94	33.4	8.06	0	26.1	1.718	1.599	178.814
M09Sept2009	2009	Sept	M09	2	1.7	7.2	1.4	29.1	7.05	29.7	8.12	29.3	4.94	33.4	8.06	0	26.1	1.718	1.599	178.814
M09Sept2009	2009	Sept	M09	3	1.7	7.2	1.4	29.1	7.05	29.7	8.12	29.3	4.94	33.4	8.06	0	26.1	1.718	1.599	178.814
M14Sept2009	2009	Sept	M14	1	1.1	3.9	0.7	29	4.91	1	7.45	29.3	4.94	1.35	7.43	1	25.5	1.678	1.084	91.1083
M14Sept2009	2009	Sept	M14	2	1.1	3.9	0.7	29	4.91	1	7.45	29.3	4.94	1.35	7.43	1	25.5	1.678	1.084	91.1083
M14Sept2009	2009	Sept	M14	3	1.1	3.9	0.7	29	4.91	1	7.45	29.3	4.94	1.35	7.43	1	25.5	1.678	1.084	91.1083
M01Jan2010	2010	Jan	M01	1	1.4	4.21	1.2	16.85	10.55	0.91	7.47	16.85	10.4	0.92	7.47	1	11.5	1.628	1.86	114
M01Jan2010	2010	Jan	M01	2	1.4	4.21	1.2	16.85	10.55	0.91	7.47	16.85	10.4	0.92	7.47	1	11.5	1.628	1.86	114
M01Jan2010	2010	Jan	M01	3	1.4	4.21	1.2	16.85	10.55	0.91	7.47	16.85	10.4	0.92	7.47	1	11.5	1.628	1.86	114
M02Jan2010	2010	Jan	M02	1	1.6	3.13	1	15.82	11.3	5.16	7.41	15.6	11.34	5.46	7.39	1	11.2	4.056	2.001	192.6
M02Jan2010	2010	Jan	M02	2	1.6	3.13	1	15.82	11.3	5.16	7.41	15.6	11.34	5.46	7.39	1	11.2	4.056	2.001	192.6
M02Jan2010	2010	Jan	M02	3	1.6	3.13	1	15.82	11.3	5.16	7.41	15.6	11.34	5.46	7.39	1	11.2	4.056	2.001	192.6
M03Jan2010	2010	Jan	M03	1	3.1	1.7	2.2	10.94	10.43	16.76	7.09	10.92	9.54	20.59	7.1	1	11.9	1.436	1.167	274.057
M03Jan2010	2010	Jan	M03	2	3.1	1.7	2.2	10.94	10.43	16.76	7.09	10.92	9.54	20.59	7.1	1	11.9	1.436	1.167	274.057
M03Jan2010	2010	Jan	M03	3	3.1	1.7	2.2	10.94	10.43	16.76	7.09	10.92	9.54	20.59	7.1	1	11.9	1.436	1.167	274.057
M05Jan2010	2010	Jan	M05	1	2.5	4.98	2	11.41	9.89	19.89	7.13	11.37	9.65	25.45	7.16	1	15.4	1.4093	0.9279	205.9
M05Jan2010	2010	Jan	M05	2	2.5	4.98	2	11.41	9.89	19.89	7.13	11.37	9.65	25.45	7.16	1	15.4	1.4093	0.9279	205.9
M05Jan2010	2010	Jan	M05	3	2.5	4.98	2	11.41	9.89	19.89	7.13	11.37	9.65	25.45	7.16	1	15.4	1.4093	0.9279	205.9
M06Jan2010	2010	Jan	M06	1	2.7	4.25	2	11.48	9.79	25.9	7.14	11.61	9.48	29.52	7.15	0	14.4	1.5562	0.9709	209.514
M06Jan2010	2010	Jan	M06	2	2.7	4.25	2	11.48	9.79	25.9	7.14	11.61	9.48	29.52	7.15	0	14.4	1.5562	0.9709	209.514
M06Jan2010	2010	Jan	M06	3	2.7	4.25	2	11.48	9.79	25.9	7.14	11.61	9.48	29.52	7.15	0	14.4	1.5562	0.9709	209.514
M07Jan2010	2010	Jan	M07	1	2.1	1.16	9.9	14.71	8.66	34.04	7.34	15	8.35	34.56	7.36	0	18.8	1.093	0.9389	85.2171
M07Jan2010	2010	Jan	M07	2	2.1	1.16	9.9	14.71	8.66	34.04	7.34	15	8.35	34.56	7.36	0	18.8	1.093	0.9389	85.2171
M07Jan2010	2010	Jan	M07	3	2.1	1.16	9.9	14.71	8.66	34.04	7.34	15	8.35	34.56	7.36	0	18.8	1.093	0.9389	85.2171
M08Jan2010	2010	Jan	M08	1	1.1	1.39	9.9	12.65	9.78	31.01	7.25	12.59	9.79	31.01	7.26	0	16.6	1.3374	0.6705	108.817
M08Jan2010	2010	Jan	M08	2	1.1	1.39	9.9	12.65	9.78	31.01	7.25	12.59	9.79	31.01	7.26	0	16.6	1.3374	0.6705	108.817
M08Jan2010	2010	Jan	M08	3	1.1	1.39	9.9	12.65	9.78	31.01	7.25	12.59	9.79	31.01	7.26	0	16.6	1.3374	0.6705	108.817
M09Jan2010	2010	Jan	M09	1	1.5	4.58	9.9	14.35	8.51	34.84	7.3	15.21	8.08	35.33	7.35	0	16.2	2.0131	1.0274	178.814
M09Jan2010	2010	Jan	M09	2	1.5	4.58	9.9	14.35	8.51	34.84	7.3	15.21	8.08	35.33	7.35	0	16.2	2.0131	1.0274	178.814
M09Jan2010	2010	Jan	M09	3	1.5	4.58	9.9	14.35	8.51	34.84	7.3	15.21	8.08	35.33	7.35	0	16.2	2.0131	1.0274	178.814
M12Jan2010	2010	Jan	M12	1	1.7	2.74	9.9	13.01	8.71	33.85	7.53	12.99	8.55	34.29	7.53	0	18.4	1.3864	1.014	165.017
M12Jan2010	2010	Jan	M12	2	1.7	2.74	9.9	13.01	8.71	33.85	7.53	12.99	8.55	34.29	7.53	0	18.4	1.3864	1.014	165.017
M12Jan2010	2010	Jan	M12	3	1.7	2.74	9.9	13.01	8.71	33.85	7.53	12.99	8.55	34.29	7.53	0	18.4	1.3864	1.014	165.017
M13Jan2010	2010	Jan	M13	1	1.2	4.15	9.9	12.32	9.72	30.31	7.52	12.32	9.4	30.37	7.52	0	18.5	1.7253	1.3274	183.167
M13Jan2010	2010	Jan	M13	2	1.2	4.15	9.9	12.32	9.72	30.31	7.52	12.32	9.4	30.37	7.52	0	18.5	1.7253	1.3274	183.167
M13Jan2010	2010	Jan	M13	3	1.2	4.15	9.9	12.32	9.72	30.31	7.52	12.32	9.4	30.37	7.52	0	18.5	1.7253	1.3274	183.167
M14Jan2010	2010	Jan	M14	1	1.9	3.88	1.1	11.79	10.52	6.1	7.03	11.44	10.3	10.85	7.03	1	12.7	2.1641	0.8455	91.1083
M14Jan2010	2010	Jan	M14	2	1.9	3.88	1.1	11.79	10.52	6.1	7.03	11.44	10.3	10.85	7.03	1	12.7	2.1641	0.8455	91.1083
M14Jan2010	2010	Jan	M14	3	1.9	3.88	1.1	11.79	10.52	6.1	7.03	11.44	10.3	10.85	7.03	1	12.7	2.1641	0.8455	91.1083
M01Apr2010	2010	Apr	M01	1	1.5	14	0.5	24.7	7.53	0.5	7.75	24.4	7.01	0.5	7.71	1	26	1.4319	0.727	114
M01Apr2010	2010	Apr	M01	2	1.5	14	0.5	24.7	7.53	0.5	7.75	24.4	7.01	0.5	7.71	1	26	1.4319	0.727	114
M01Apr2010	2010	Apr	M01	3	1.5	14	0.5	24.7	7.53	0.5	7.75	24.4	7.01	0.5	7.71	1	26	1.4319	0.727	114
M02Apr2010	2010	Apr	M02	1	1.8	6.4	0.9	24.2	7.84	0.6	7.84	24	7.49	0.6	7.79	1	25.5	1.5228	0.9536	192.6
M02Apr2010	2010	Apr	M02	2	1.8	6.4	0.9	24.2	7.84	0.6	7.84	24	7.49	0.6	7.79	1	25.5	1.5228	0.9536	192.6
M02Apr2010	2010	Apr	M02	3	1.8	6.4	0.9	24.2	7.84	0.6	7.84	24	7.49	0.6	7.79	1	25.5	1.5228	0.9536	192.6
M03Apr2010	2010	Apr	M03	1	3	7.7	0.7	23.5	7.51	2.2	7.99	23.5	6.21	2.5	8.83	1	23	0.9315	1.0737	274.057
M03Apr2010	2010	Apr	M03	2	3	7.7	0.7	23.5	7.51	2.2	7.99	23.5	6.21	2.5	8.83	1	23	0.9315	1.0737	274.057
M03Apr2010	2010	Apr	M03	3	3	7.7	0.7	23.5	7.51	2.2	7.99	23.5	6.21	2.5	8.83	1	23	0.9315	1.0737	274.057
M04Apr2010	2010	Apr	M04	1	1.7	9.7	0.7	23.1	7.18	0.3	7.53	23.7	6.44	1.7	7.46	1	23.2	7.335	10.17	294.824
M04Apr2010	2010	Apr	M04	2	1.7	9.7	0.7	23.1	7.18	0.3	7.53	23.7	6.44	1.7	7.46	1	23.2	7.335	10.17	294.824
M04Apr2010	2010	Apr	M04	3	1.7	9.7	0.7	23.1	7.18	0.3	7.53	23.7	6.44	1.7	7.46	1	23.2	7.335	10.17	294.824
M05Apr2010	2010	Apr	M05	1	2.1	12.3	0.7	23.4	6.8	2.6	7.68	22.2	6.24	9	7.69	1	22.7	2.046	1.484	205.9
M05Apr2010	2010	Apr	M05	2	2.1	12.3	0.7	23.4	6.8	2.6	7.68	22.2	6.24	9	7.69	1	22.7	2.046	1.484	205.9
M05Apr2010	2010	Apr	M05	3	2.1	12.3	0.7	23.4	6.8	2.6	7.68	22.2	6.24	9	7.69	1	22.7	2.046	1.484	205.9
M06Apr2010	2010	Apr	M06	1	2.7	7.3	0.9	23.3	7.19	5.6	7.77	23	6.17	20.1	7.94	0	23.2	1.386	0.956	209.514
M06Apr2010	2010	Apr	M06	2	2.7	7.3	0.9	23.3	7.19	5.6	7.77	23	6.17	20.1	7.94	0	23.2	1.386	0.956	209.514
M06Apr2010	2010	Apr	M06	3	2.7	7.3	0.9	23.3	7.19	5.6	7.77	23	6.17	20.1	7.94	0	23.2	1.386	0.956	209.514
M07Apr2010	2010	Apr	M07	1	1.6	3.8	1.4	24	7.25	14.6	8.04	24	7.22	14.6	8.05	0	23.1	1.48	1.533	85.2171
M07Apr2010	2010	Apr	M07	2	1.6	3.8	1.4	24	7.25	14.6	8.04	24	7.22	14.6	8.05	0	23.1	1.48	1.533	85.2171
M07Apr2010	2010	Apr	M07	3	1.6	3.8	1.4	24	7.25	14.6	8.04	24	7.22	14.6	8.05	0	23.1	1.48	1.533	85.2171
M08Apr2010	2010	Apr	M08	1	1.2	5.1	9.9	23.7	7.12	23.5	8.1	23.7	7.15	23.5	8.11	0	23.2	1.593	1.168	108.817
M08Apr2010	2010	Apr	M08	2	1.2	5.1	9.9	23.7	7.12	23.5	8.1	23.7	7.15	23.5	8.11	0	23.2	1.593	1.168	108.817
M08Apr2010	2010	Apr	M08	3	1.2	5.1	9.9	23.7	7.12	23.5	8.1	23.7	7.15	23.5	8.11	0	23.2	1.593	1.168	108.817
M09Apr2010	2010	Apr	M09	1	1.4	2.5	9.9	23.2	7.18	27.8	8.07	22.4	7.04	31.3	8.1	0	22.3	1.198	0.877	178.814
M09Apr2010	2010	Apr	M09	2	1.4	2.5	9.9	23.2	7.18	27.8	8.07	22.4	7.04	31.3	8.1	0	22.3	1.198	0.877	178.814
M09Apr2010	2010	Apr	M09	3	1.4	2.5	9.9	23.2	7.18	27.8	8.07	22.4	7.04	31.3	8.1	0	22.3	1.198	0.877	178.814
M10Apr2010	2010	Apr	M10	1	1.5	9.1	0	23.3	6.63	29.4	8.14	23.3	6.43	29.4	8.14	0	21.9	1.241	0.728	80.7917
M10Apr2010	2010	Apr	M10	2	1.5	9.1	0	23.3	6.63	29.4	8.14	23.3	6.43	29.4	8.14	0	21.9	1.241	0.728	80.7917
M10Apr2010	2010	Apr	M10	3	1.5	9.1	0	23.3	6.63	29.4	8.14	23.3	6.43	29.4	8.14	0	21.9	1.241	0.728	80.7917
M11Apr2010	2010	Apr	M11	1	1.9	3.8	1.7	23.4	6.45	30.3	8.34	23.4	6.48	30.3	8.32	0	21.6	1.298	1.066	79.315
M11Apr2010	2010	Apr	M11	2	1.9	3.8	1.7	23.4	6.45	30.3	8.34	23.4	6.48	30.3	8.32	0	21.6	1.298	1.066	79.315
M11Apr2010	2010	Apr	M11	3	1.9	3.8	1.7	23.4	6.45	30.3	8.34	23.4	6.48	30.3	8.32	0	21.6	1.298	1.066	79.315
M12Apr2010	2010	Apr	M12	1	1.4	4.1	9.9	22.7	6.9	31.7	8.17	22.7	6.96	31.8	8.18	0	22.6	1.184	0.789	165.017
M12Apr2010	2010	Apr	M12	2	1.4	4.1	9.9	22.7	6.9	31.7	8.17	22.7	6.96	31.8	8.18	0	22.6	1.184	0.789	165.017
M12Apr2010	2010	Apr	M12	3	1.4	4.1	9.9	22.7	6.9	31.7	8.17	22.7	6.96	31.8	8.18	0	22.6	1.184	0.789	165.017
M13Apr2010	2010	Apr	M13	1	1.1	3.6	9.9	22.9	6.85	24	8.28	23.2	6.78	28.7	8.21	0	22.8	1.264	1.09	183.167
M13Apr2010	2010	Apr	M13	2	1.1	3.6	9.9	22.9	6.85	24	8.28	23.2	6.78	28.7	8.21	0	22.8	1.264	1.09	183.167
M13Apr2010	2010	Apr	M13	3	1.1	3.6	9.9	22.9	6.85	24	8.28	23.2	6.78	28.7	8.21	0	22.8	1.264	1.09	183.167
M14Apr2010	2010	Apr	M14	1	1.7	10.2	0.6	22.9	7.03	0.3	7.44	22.9	6.89	0.3	7.47	1	21.5	1.098	0.735	91.1083
M14Apr2010	2010	Apr	M14	2	1.7	10.2	0.6	22.9	7.03	0.3	7.44	22.9	6.89	0.3	7.47	1	21.5	1.098	0.735	91.1083
M14Apr2010	2010	Apr	M14	3	1.7	10.2	0.6	22.9	7.03	0.3	7.44	22.9	6.89	0.3	7.47	1	21.5	1.098	0.735	91.1083
M01Jul2010	2010	Jul	M01	1	1.7	4.2	1	29.5	6.37	0.6	8.02	29.4	5.88	0.6	7.95	1	28.4	1.241	0.903	114
M01Jul2010	2010	Jul	M01	2	1.7	4.2	1	29.5	6.37	0.6	8.02	29.4	5.88	0.6	7.95	1	28.4	1.241	0.903	114
M01Jul2010	2010	Jul	M01	3	1.7	4.2	1	29.5	6.37	0.6	8.02	29.4	5.88	0.6	7.95	1	28.4	1.241	0.903	114
M02Jul2010	2010	Jul	M02	1	2.1	5.3	1	30.2	6.62	0.7	8.27	30.2	6.6	0.7	8.22	1	26.5	0.869	1.242	192.6
M02Jul2010	2010	Jul	M02	2	2.1	5.3	1	30.2	6.62	0.7	8.27	30.2	6.6	0.7	8.22	1	26.5	0.869	1.242	192.6
M02Jul2010	2010	Jul	M02	3	2.1	5.3	1	30.2	6.62	0.7	8.27	30.2	6.6	0.7	8.22	1	26.5	0.869	1.242	192.6
M03Jul2010	2010	Jul	M03	1	3	2.7	1.2	29.3	6.59	4.4	8.28	30	4.19	8.4	7.96	1	29.8	1.289	1.365	274.057
M03Jul2010	2010	Jul	M03	2	3	2.7	1.2	29.3	6.59	4.4	8.28	30	4.19	8.4	7.96	1	29.8	1.289	1.365	274.057
M03Jul2010	2010	Jul	M03	3	3	2.7	1.2	29.3	6.59	4.4	8.28	30	4.19	8.4	7.96	1	29.8	1.289	1.365	274.057
M05Jul2010	2010	Jul	M05	1	2.2	5.2	1.1	28.8	6.79	10.4	8.24	28.8	6.58	10.9	8.2	1	29.1	1.139	0.858	205.9
M05Jul2010	2010	Jul	M05	2	2.2	5.2	1.1	28.8	6.79	10.4	8.24	28.8	6.58	10.9	8.2	1	29.1	1.139	0.858	205.9
M05Jul2010	2010	Jul	M05	3	2.2	5.2	1.1	28.8	6.79	10.4	8.24	28.8	6.58	10.9	8.2	1	29.1	1.139	0.858	205.9
M06Jul2010	2010	Jul	M06	1	2.7	4.5	1.3	28.5	6.11	19	8.25	28.6	5.63	24.9	8.26	0	28.7	1.168	1.278	209.514
M06Jul2010	2010	Jul	M06	2	2.7	4.5	1.3	28.5	6.11	19	8.25	28.6	5.63	24.9	8.26	0	28.7	1.168	1.278	209.514
M06Jul2010	2010	Jul	M06	3	2.7	4.5	1.3	28.5	6.11	19	8.25	28.6	5.63	24.9	8.26	0	28.7	1.168	1.278	209.514
M07Jul2010	2010	Jul	M07	1	2	5.4	1.3	29.2	6.82	20.7	8.3	29.1	6.63	21.5	8.3	0	29.2	0.875	1.036	85.2171
M07Jul2010	2010	Jul	M07	2	2	5.4	1.3	29.2	6.82	20.7	8.3	29.1	6.63	21.5	8.3	0	29.2	0.875	1.036	85.2171
M07Jul2010	2010	Jul	M07	3	2	5.4	1.3	29.2	6.82	20.7	8.3	29.1	6.63	21.5	8.3	0	29.2	0.875	1.036	85.2171
M08Jul2010	2010	Jul	M08	1	0.9	9.1	9.9	30.5	6.44	30.7	8.23	30.5	6.07	30.8	8.22	0	29.3	1.898	0.795	108.817
M08Jul2010	2010	Jul	M08	2	0.9	9.1	9.9	30.5	6.44	30.7	8.23	30.5	6.07	30.8	8.22	0	29.3	1.898	0.795	108.817
M08Jul2010	2010	Jul	M08	3	0.9	9.1	9.9	30.5	6.44	30.7	8.23	30.5	6.07	30.8	8.22	0	29.3	1.898	0.795	108.817
M09Jul2010	2010	Jul	M09	1	1.3	2.2	9.9	28.8	7.26	28.9	8.4	28.8	7.12	28.9	8.4	0	28.9	1.232	1.124	178.814
M09Jul2010	2010	Jul	M09	2	1.3	2.2	9.9	28.8	7.26	28.9	8.4	28.8	7.12	28.9	8.4	0	28.9	1.232	1.124	178.814
M09Jul2010	2010	Jul	M09	3	1.3	2.2	9.9	28.8	7.26	28.9	8.4	28.8	7.12	28.9	8.4	0	28.9	1.232	1.124	178.814
M10Jul2010	2010	Jul	M10	1	1.2	1	9.9	29.4	5.81	27.9	8.42	29.4	6.04	27.9	8.45	0	28.4	1.005	0.734	80.7917
M10Jul2010	2010	Jul	M10	2	1.2	1	9.9	29.4	5.81	27.9	8.42	29.4	6.04	27.9	8.45	0	28.4	1.005	0.734	80.7917
M10Jul2010	2010	Jul	M10	3	1.2	1	9.9	29.4	5.81	27.9	8.42	29.4	6.04	27.9	8.45	0	28.4	1.005	0.734	80.7917
M11Jul2010	2010	Jul	M11	1	1.8	2.1	9.9	29.5	6.72	28	8.61	29.5	6.61	28	8.61	0	28.3	0.598	0.481	79.315
M11Jul2010	2010	Jul	M11	2	1.8	2.1	9.9	29.5	6.72	28	8.61	29.5	6.61	28	8.61	0	28.3	0.598	0.481	79.315
M11Jul2010	2010	Jul	M11	3	1.8	2.1	9.9	29.5	6.72	28	8.61	29.5	6.61	28	8.61	0	28.3	0.598	0.481	79.315
M12Jul2010	2010	Jul	M12	1	1.3	2.6	9.9	29.7	7.79	28.1	8.44	29.7	7.68	28.1	8.44	0	28.4	0.8985	0.7977	165.017
M12Jul2010	2010	Jul	M12	2	1.3	2.6	9.9	29.7	7.79	28.1	8.44	29.7	7.68	28.1	8.44	0	28.4	0.8985	0.7977	165.017
M12Jul2010	2010	Jul	M12	3	1.3	2.6	9.9	29.7	7.79	28.1	8.44	29.7	7.68	28.1	8.44	0	28.4	0.8985	0.7977	165.017
M13Jul2010	2010	Jul	M13	1	1	1.8	9.9	30.3	7.91	29.7	8.59	30.3	8.27	29.7	8.59	0	30.7	1.1364	0.4523	183.167
M13Jul2010	2010	Jul	M13	2	1	1.8	9.9	30.3	7.91	29.7	8.59	30.3	8.27	29.7	8.59	0	30.7	1.1364	0.4523	183.167
M13Jul2010	2010	Jul	M13	3	1	1.8	9.9	30.3	7.91	29.7	8.59	30.3	8.27	29.7	8.59	0	30.7	1.1364	0.4523	183.167
M14Jul2010	2010	Jul	M14	1	2.3	11.2	0.8	29.1	6.82	0.2	8.15	29	6.6	0.2	8.06	0	28.8	1.0265	0.6124	91.1083
M14Jul2010	2010	Jul	M14	2	2.3	11.2	0.8	29.1	6.82	0.2	8.15	29	6.6	0.2	8.06	0	28.8	1.0265	0.6124	91.1083
M14Jul2010	2010	Jul	M14	3	2.3	11.2	0.8	29.1	6.82	0.2	8.15	29	6.6	0.2	8.06	0	28.8	1.0265	0.6124	91.1083
M01Oct2010	2010	Oct	M01	1	2.3	8.62	1	26.1	6.08	1.2	8.04	26	5.8	1.4	8	0	28	0.88	1.3861	114
M01Oct2010	2010	Oct	M01	2	2.3	8.62	1	26.1	6.08	1.2	8.04	26	5.8	1.4	8	0	28	0.88	1.3861	114
M01Oct2010	2010	Oct	M01	3	2.3	8.62	1	26.1	6.08	1.2	8.04	26	5.8	1.4	8	0	28	0.88	1.3861	114
M02Oct2010	2010	Oct	M02	1	2	3.08	1.1	26	5.72	8.3	7.99	26	5.52	8.7	8.03	1	27.3	1.4727	1.1535	192.6
M02Oct2010	2010	Oct	M02	2	2	3.08	1.1	26	5.72	8.3	7.99	26	5.52	8.7	8.03	1	27.3	1.4727	1.1535	192.6
M02Oct2010	2010	Oct	M02	3	2	3.08	1.1	26	5.72	8.3	7.99	26	5.52	8.7	8.03	1	27.3	1.4727	1.1535	192.6
M04Oct2010	2010	Oct	M04	1	2.1	5.13	1	26.1	6.83	4.6	8.06	27.6	5.55	10.4	7.96	1	23.5	1.2863	0.8014	294.824
M04Oct2010	2010	Oct	M04	2	2.1	5.13	1	26.1	6.83	4.6	8.06	27.6	5.55	10.4	7.96	1	23.5	1.2863	0.8014	294.824
M04Oct2010	2010	Oct	M04	3	2.1	5.13	1	26.1	6.83	4.6	8.06	27.6	5.55	10.4	7.96	1	23.5	1.2863	0.8014	294.824
M06Oct2010	2010	Oct	M06	1	2.9	2.93	1.8	26.3	7.53	16.2	8.2	27.4	5.36	27.6	8.27	0	26.4	0.5787	0.4844	209.514
M06Oct2010	2010	Oct	M06	2	2.9	2.93	1.8	26.3	7.53	16.2	8.2	27.4	5.36	27.6	8.27	0	26.4	0.5787	0.4844	209.514
M06Oct2010	2010	Oct	M06	3	2.9	2.93	1.8	26.3	7.53	16.2	8.2	27.4	5.36	27.6	8.27	0	26.4	0.5787	0.4844	209.514
M07Oct2010	2010	Oct	M07	1	2.2	5.71	1.5	26.9	7.53	24.7	8.36	26.9	7.18	25.1	8.39	0	26.5	0.6795	0.582	85.2171
M07Oct2010	2010	Oct	M07	2	2.2	5.71	1.5	26.9	7.53	24.7	8.36	26.9	7.18	25.1	8.39	0	26.5	0.6795	0.582	85.2171
M07Oct2010	2010	Oct	M07	3	2.2	5.71	1.5	26.9	7.53	24.7	8.36	26.9	7.18	25.1	8.39	0	26.5	0.6795	0.582	85.2171
M08Oct2010	2010	Oct	M08	1	1	9.53	0.9	27.1	7.84	26.7	8.32	27.1	7.24	26.7	8.36	0	26.5	1.2244	0.8109	108.817
M08Oct2010	2010	Oct	M08	2	1	9.53	0.9	27.1	7.84	26.7	8.32	27.1	7.24	26.7	8.36	0	26.5	1.2244	0.8109	108.817
M08Oct2010	2010	Oct	M08	3	1	9.53	0.9	27.1	7.84	26.7	8.32	27.1	7.24	26.7	8.36	0	26.5	1.2244	0.8109	108.817
M09Oct2010	2010	Oct	M09	1	1.6	10.4	0.9	26.4	7	29.4	8.42	26.4	7	29.4	8.42	0	27.2	1.1959	0.8524	178.814
M09Oct2010	2010	Oct	M09	2	1.6	10.4	0.9	26.4	7	29.4	8.42	26.4	7	29.4	8.42	0	27.2	1.1959	0.8524	178.814
M09Oct2010	2010	Oct	M09	3	1.6	10.4	0.9	26.4	7	29.4	8.42	26.4	7	29.4	8.42	0	27.2	1.1959	0.8524	178.814
M10Oct2010	2010	Oct	M10	1	2	13.1	0.8	24.1	6.21	31.5	8.31	24.2	6.13	31.6	8.3	0	25.3	1.1483	0.6723	80.7917
M10Oct2010	2010	Oct	M10	2	2	13.1	0.8	24.1	6.21	31.5	8.31	24.2	6.13	31.6	8.3	0	25.3	1.1483	0.6723	80.7917
M10Oct2010	2010	Oct	M10	3	2	13.1	0.8	24.1	6.21	31.5	8.31	24.2	6.13	31.6	8.3	0	25.3	1.1483	0.6723	80.7917
M11Oct2010	2010	Oct	M11	1	2.6	5.48	1.4	24.7	6.89	32.3	8.34	24.7	6.53	32.3	8.35	0	25.6	1.475	0.73	79.315
M11Oct2010	2010	Oct	M11	2	2.6	5.48	1.4	24.7	6.89	32.3	8.34	24.7	6.53	32.3	8.35	0	25.6	1.475	0.73	79.315
M11Oct2010	2010	Oct	M11	3	2.6	5.48	1.4	24.7	6.89	32.3	8.34	24.7	6.53	32.3	8.35	0	25.6	1.475	0.73	79.315
M12Oct2010	2010	Oct	M12	1	2.2	13.2	1.3	26.1	6.79	33.2	8.38	26.1	6.74	33.2	8.41	0	25.6	0.919	0.751	165.017
M12Oct2010	2010	Oct	M12	2	2.2	13.2	1.3	26.1	6.79	33.2	8.38	26.1	6.74	33.2	8.41	0	25.6	0.919	0.751	165.017
M12Oct2010	2010	Oct	M12	3	2.2	13.2	1.3	26.1	6.79	33.2	8.38	26.1	6.74	33.2	8.41	0	25.6	0.919	0.751	165.017
M13Oct2010	2010	Oct	M13	1	1.9	10.2	0.8	24.7	6.58	29.1	8.27	24.7	6.52	29.3	8.28	0	25.5	1.04	0.949	183.167
M13Oct2010	2010	Oct	M13	2	1.9	10.2	0.8	24.7	6.58	29.1	8.27	24.7	6.52	29.3	8.28	0	25.5	1.04	0.949	183.167
M13Oct2010	2010	Oct	M13	3	1.9	10.2	0.8	24.7	6.58	29.1	8.27	24.7	6.52	29.3	8.28	0	25.5	1.04	0.949	183.167
M14Oct2010	2010	Oct	M14	1	2	5.08	0.9	26.2	6.13	1.2	7.76	26.5	4.84	1.9	7.79	0	23	1.103	0.951	91.1083
M14Oct2010	2010	Oct	M14	2	2	5.08	0.9	26.2	6.13	1.2	7.76	26.5	4.84	1.9	7.79	0	23	1.103	0.951	91.1083
M14Oct2010	2010	Oct	M14	3	2	5.08	0.9	26.2	6.13	1.2	7.76	26.5	4.84	1.9	7.79	0	23	1.103	0.951	91.1083
M01Jan2011	2011	Jan	M01	1	1.8	3.8	1.1	18.7	8.15	10.1	8.59	17.8	7.29	11	8.53	1	24.1	1.423	0.932	114
M01Jan2011	2011	Jan	M01	2	1.8	3.8	1.1	18.7	8.15	10.1	8.59	17.8	7.29	11	8.53	1	24.1	1.423	0.932	114
M01Jan2011	2011	Jan	M01	3	1.8	3.8	1.1	18.7	8.15	10.1	8.59	17.8	7.29	11	8.53	1	24.1	1.423	0.932	114
M02Jan2011	2011	Jan	M02	1	2.1	2.5	1.5	18.4	7.52	20.9	8.37	17.9	7.3	22.4	8.43	1	24.2	0.969	1.008	192.6
M02Jan2011	2011	Jan	M02	2	2.1	2.5	1.5	18.4	7.52	20.9	8.37	17.9	7.3	22.4	8.43	1	24.2	0.969	1.008	192.6
M02Jan2011	2011	Jan	M02	3	2.1	2.5	1.5	18.4	7.52	20.9	8.37	17.9	7.3	22.4	8.43	1	24.2	0.969	1.008	192.6
M03Jan2011	2011	Jan	M03	1	3	2	2	17.8	9.66	23.4	8.33	17.7	8.39	25.1	8.26	1	21	1.494	1.383	274.057
M03Jan2011	2011	Jan	M03	2	3	2	2	17.8	9.66	23.4	8.33	17.7	8.39	25.1	8.26	1	21	1.494	1.383	274.057
M03Jan2011	2011	Jan	M03	3	3	2	2	17.8	9.66	23.4	8.33	17.7	8.39	25.1	8.26	1	21	1.494	1.383	274.057
M04Jan2011	2011	Jan	M04	1	1.8	3.1	1.6	18.3	8.83	23	8.31	17.9	7.79	24.6	8.23	1	22.3	0.929	0.923	294.824
M04Jan2011	2011	Jan	M04	2	1.8	3.1	1.6	18.3	8.83	23	8.31	17.9	7.79	24.6	8.23	1	22.3	0.929	0.923	294.824
M04Jan2011	2011	Jan	M04	3	1.8	3.1	1.6	18.3	8.83	23	8.31	17.9	7.79	24.6	8.23	1	22.3	0.929	0.923	294.824
M05Jan2011	2011	Jan	M05	1	2.4	1.5	1.5	17.9	9.34	26.1	8.24	18.5	8.08	28.2	8.13	1	18.8	0.969	1.043	205.9
M05Jan2011	2011	Jan	M05	2	2.4	1.5	1.5	17.9	9.34	26.1	8.24	18.5	8.08	28.2	8.13	1	18.8	0.969	1.043	205.9
M05Jan2011	2011	Jan	M05	3	2.4	1.5	1.5	17.9	9.34	26.1	8.24	18.5	8.08	28.2	8.13	1	18.8	0.969	1.043	205.9
M06Jan2011	2011	Jan	M06	1	2.9	4.2	1.5	19.1	8.3	29.4	8.07	19.6	7.62	30.6	8.1	0	21	1.031	1.511	209.514
M06Jan2011	2011	Jan	M06	2	2.9	4.2	1.5	19.1	8.3	29.4	8.07	19.6	7.62	30.6	8.1	0	21	1.031	1.511	209.514
M06Jan2011	2011	Jan	M06	3	2.9	4.2	1.5	19.1	8.3	29.4	8.07	19.6	7.62	30.6	8.1	0	21	1.031	1.511	209.514
M07Jan2011	2011	Jan	M07	1	2.1	3.7	2.1	21.1	7.91	32.9	8.55	21.2	7.86	33.1	8.53	0	22.1	1.314	1.321	85.2171
M07Jan2011	2011	Jan	M07	2	2.1	3.7	2.1	21.1	7.91	32.9	8.55	21.2	7.86	33.1	8.53	0	22.1	1.314	1.321	85.2171
M07Jan2011	2011	Jan	M07	3	2.1	3.7	2.1	21.1	7.91	32.9	8.55	21.2	7.86	33.1	8.53	0	22.1	1.314	1.321	85.2171
M08Jan2011	2011	Jan	M08	1	1	3	1	20.8	8.46	32.2	8.52	20.8	8.21	32.2	8.49	0	21.4	1.256	1.085	108.817
M08Jan2011	2011	Jan	M08	2	1	3	1	20.8	8.46	32.2	8.52	20.8	8.21	32.2	8.49	0	21.4	1.256	1.085	108.817
M08Jan2011	2011	Jan	M08	3	1	3	1	20.8	8.46	32.2	8.52	20.8	8.21	32.2	8.49	0	21.4	1.256	1.085	108.817
M09Jan2011	2011	Jan	M09	1	1.5	4	1.5	21.3	8.04	33.9	8.59	21.3	7.31	33.8	8.56	0	22.2	1.059	0.8	178.814
M09Jan2011	2011	Jan	M09	2	1.5	4	1.5	21.3	8.04	33.9	8.59	21.3	7.31	33.8	8.56	0	22.2	1.059	0.8	178.814
M09Jan2011	2011	Jan	M09	3	1.5	4	1.5	21.3	8.04	33.9	8.59	21.3	7.31	33.8	8.56	0	22.2	1.059	0.8	178.814
M10Jan2011	2011	Jan	M10	1	1.3	3.6	1.3	18.1	8.17	34.3	8.17	18.1	7.68	34.3	8.12	0	18	1.485	1.271	80.7917
M10Jan2011	2011	Jan	M10	2	1.3	3.6	1.3	18.1	8.17	34.3	8.17	18.1	7.68	34.3	8.12	0	18	1.485	1.271	80.7917
M10Jan2011	2011	Jan	M10	3	1.3	3.6	1.3	18.1	8.17	34.3	8.17	18.1	7.68	34.3	8.12	0	18	1.485	1.271	80.7917
M11Jan2011	2011	Jan	M11	1	1.9	1.8	1.9	17.4	8.14	34.1	8.06	17.4	8.04	341	8.04	0	17.5	1.279	0.913	79.315
M11Jan2011	2011	Jan	M11	2	1.9	1.8	1.9	17.4	8.14	34.1	8.06	17.4	8.04	341	8.04	0	17.5	1.279	0.913	79.315
M11Jan2011	2011	Jan	M11	3	1.9	1.8	1.9	17.4	8.14	34.1	8.06	17.4	8.04	341	8.04	0	17.5	1.279	0.913	79.315
M12Jan2011	2011	Jan	M12	1	1.6	3.4	1.6	21.1	7.56	34	8.24	21.2	7.4	34	8.22	0	17.9	1.821	1.654	165.017
M12Jan2011	2011	Jan	M12	2	1.6	3.4	1.6	21.1	7.56	34	8.24	21.2	7.4	34	8.22	0	17.9	1.821	1.654	165.017
M12Jan2011	2011	Jan	M12	3	1.6	3.4	1.6	21.1	7.56	34	8.24	21.2	7.4	34	8.22	0	17.9	1.821	1.654	165.017
M13Jan2011	2011	Jan	M13	1	1.5	9	1	19.2	7.85	32.6	8.17	19.2	7.74	32.5	8.14	0	19	1.26	1.382	183.167
M13Jan2011	2011	Jan	M13	2	1.5	9	1	19.2	7.85	32.6	8.17	19.2	7.74	32.5	8.14	0	19	1.26	1.382	183.167
M13Jan2011	2011	Jan	M13	3	1.5	9	1	19.2	7.85	32.6	8.17	19.2	7.74	32.5	8.14	0	19	1.26	1.382	183.167
M14Jan2011	2011	Jan	M14	1	1.8	3.9	1.3	18.5	8.92	18.5	8.28	18.2	7.68	20.6	8.2	1	22.9	1.291	1.536	91.1083
M14Jan2011	2011	Jan	M14	2	1.8	3.9	1.3	18.5	8.92	18.5	8.28	18.2	7.68	20.6	8.2	1	22.9	1.291	1.536	91.1083
M14Jan2011	2011	Jan	M14	3	1.8	3.9	1.3	18.5	8.92	18.5	8.28	18.2	7.68	20.6	8.2	1	22.9	1.291	1.536	91.1083
M01Apr2011	2011	Apr	M01	1	1.7	5.86	0.9	25.72	7.76	4.23	8.04	25.4	6.57	4.48	7.96	1	24.3	1.253	1.443	114
M01Apr2011	2011	Apr	M01	2	1.7	5.86	0.9	25.72	7.76	4.23	8.04	25.4	6.57	4.48	7.96	1	24.3	1.253	1.443	114
M01Apr2011	2011	Apr	M01	3	1.7	5.86	0.9	25.72	7.76	4.23	8.04	25.4	6.57	4.48	7.96	1	24.3	1.253	1.443	114
M02Apr2011	2011	Apr	M02	1	2	5.75	1.1	25.52	7.39	12.87	7.93	25.57	4.24	19.4	7.71	1	24.7	1.339	1.774	192.6
M02Apr2011	2011	Apr	M02	2	2	5.75	1.1	25.52	7.39	12.87	7.93	25.57	4.24	19.4	7.71	1	24.7	1.339	1.774	192.6
M02Apr2011	2011	Apr	M02	3	2	5.75	1.1	25.52	7.39	12.87	7.93	25.57	4.24	19.4	7.71	1	24.7	1.339	1.774	192.6
M03Apr2011	2011	Apr	M03	1	2.9	7.54	1.5	25.11	6.47	24.22	7.99	25.49	4.28	25.08	7.83	1	25.1	2.207	1.188	274.057
M03Apr2011	2011	Apr	M03	2	2.9	7.54	1.5	25.11	6.47	24.22	7.99	25.49	4.28	25.08	7.83	1	25.1	2.207	1.188	274.057
M03Apr2011	2011	Apr	M03	3	2.9	7.54	1.5	25.11	6.47	24.22	7.99	25.49	4.28	25.08	7.83	1	25.1	2.207	1.188	274.057
M04Apr2011	2011	Apr	M04	1	1.6	4.43	1	25.33	6.24	21.59	7.89	25.94	5.37	25.68	7.87	0	25.5	1.6036	0.853	294.824
M04Apr2011	2011	Apr	M04	2	1.6	4.43	1	25.33	6.24	21.59	7.89	25.94	5.37	25.68	7.87	0	25.5	1.6036	0.853	294.824
M04Apr2011	2011	Apr	M04	3	1.6	4.43	1	25.33	6.24	21.59	7.89	25.94	5.37	25.68	7.87	0	25.5	1.6036	0.853	294.824
M05Apr2011	2011	Apr	M05	1	2.2	7.13	0.9	25.23	6.38	27.49	7.99	25.3	6.34	28.12	8	1	25.6	2.3525	2.235	205.9
M05Apr2011	2011	Apr	M05	2	2.2	7.13	0.9	25.23	6.38	27.49	7.99	25.3	6.34	28.12	8	1	25.6	2.3525	2.235	205.9
M05Apr2011	2011	Apr	M05	3	2.2	7.13	0.9	25.23	6.38	27.49	7.99	25.3	6.34	28.12	8	1	25.6	2.3525	2.235	205.9
M06Apr2011	2011	Apr	M06	1	2.7	7.8	1.2	24.92	7	29.34	8.09	24.97	6.51	30.6	8.11	0	25.2	1.6098	1.3487	209.514
M06Apr2011	2011	Apr	M06	2	2.7	7.8	1.2	24.92	7	29.34	8.09	24.97	6.51	30.6	8.11	0	25.2	1.6098	1.3487	209.514
M06Apr2011	2011	Apr	M06	3	2.7	7.8	1.2	24.92	7	29.34	8.09	24.97	6.51	30.6	8.11	0	25.2	1.6098	1.3487	209.514
M07Apr2011	2011	Apr	M07	1	2	5.19	0.6	24.91	7.1	33.6	8.22	24.55	6.89	34.29	8.24	0	26	1.452	1.598	85.2171
M07Apr2011	2011	Apr	M07	2	2	5.19	0.6	24.91	7.1	33.6	8.22	24.55	6.89	34.29	8.24	0	26	1.452	1.598	85.2171
M07Apr2011	2011	Apr	M07	3	2	5.19	0.6	24.91	7.1	33.6	8.22	24.55	6.89	34.29	8.24	0	26	1.452	1.598	85.2171
M08Apr2011	2011	Apr	M08	1	1.1	8.91	1.1	25.8	7.34	33.35	8.14	25.83	6.93	33.35	8.14	0	25.9	1.4056	1.266	108.817
M08Apr2011	2011	Apr	M08	2	1.1	8.91	1.1	25.8	7.34	33.35	8.14	25.83	6.93	33.35	8.14	0	25.9	1.4056	1.266	108.817
M08Apr2011	2011	Apr	M08	3	1.1	8.91	1.1	25.8	7.34	33.35	8.14	25.83	6.93	33.35	8.14	0	25.9	1.4056	1.266	108.817
M09Apr2011	2011	Apr	M09	1	1.3	2.62	1.3	24.19	7.11	34.38	8.24	24.2	7.07	34.39	8.24	0	25.9	1.4469	2.1103	178.814
M09Apr2011	2011	Apr	M09	2	1.3	2.62	1.3	24.19	7.11	34.38	8.24	24.2	7.07	34.39	8.24	0	25.9	1.4469	2.1103	178.814
M09Apr2011	2011	Apr	M09	3	1.3	2.62	1.3	24.19	7.11	34.38	8.24	24.2	7.07	34.39	8.24	0	25.9	1.4469	2.1103	178.814
M10Apr2011	2011	Apr	M10	1	1.1	9.04	0	22.35	5.82	35.45	8.1	22.34	5.75	35.46	8.11	0	20.9	1.7132	2.0557	80.7917
M10Apr2011	2011	Apr	M10	2	1.1	9.04	0	22.35	5.82	35.45	8.1	22.34	5.75	35.46	8.11	0	20.9	1.7132	2.0557	80.7917
M10Apr2011	2011	Apr	M10	3	1.1	9.04	0	22.35	5.82	35.45	8.1	22.34	5.75	35.46	8.11	0	20.9	1.7132	2.0557	80.7917
M11Apr2011	2011	Apr	M11	1	1.6	0	0.9	22.8	6.29	35.91	8.25	22.82	6.3	35.91	8.25	0	21.8	1.6151	1.3309	79.315
M11Apr2011	2011	Apr	M11	2	1.6	0	0.9	22.8	6.29	35.91	8.25	22.82	6.3	35.91	8.25	0	21.8	1.6151	1.3309	79.315
M11Apr2011	2011	Apr	M11	3	1.6	0	0.9	22.8	6.29	35.91	8.25	22.82	6.3	35.91	8.25	0	21.8	1.6151	1.3309	79.315
M12Apr2011	2011	Apr	M12	1	1.5	7.57	1	22.57	6.78	34.83	8.26	22.52	6.44	34.81	8.26	0	22	1.2142	1.1674	165.017
M12Apr2011	2011	Apr	M12	2	1.5	7.57	1	22.57	6.78	34.83	8.26	22.52	6.44	34.81	8.26	0	22	1.2142	1.1674	165.017
M12Apr2011	2011	Apr	M12	3	1.5	7.57	1	22.57	6.78	34.83	8.26	22.52	6.44	34.81	8.26	0	22	1.2142	1.1674	165.017
M13Apr2011	2011	Apr	M13	1	1	9.6	0.9	22.14	6.21	34.61	8.26	22.14	6.15	34.62	8.25	0	22.1	1.6987	1.5487	183.167
M13Apr2011	2011	Apr	M13	2	1	9.6	0.9	22.14	6.21	34.61	8.26	22.14	6.15	34.62	8.25	0	22.1	1.6987	1.5487	183.167
M13Apr2011	2011	Apr	M13	3	1	9.6	0.9	22.14	6.21	34.61	8.26	22.14	6.15	34.62	8.25	0	22.1	1.6987	1.5487	183.167
M14Apr2011	2011	Apr	M14	1	1.8	3.75	1.4	25.74	6.92	12.65	7.91	26.27	5.55	15.58	7.73	0	24.5	1.8793	1.1439	91.1083
M14Apr2011	2011	Apr	M14	2	1.8	3.75	1.4	25.74	6.92	12.65	7.91	26.27	5.55	15.58	7.73	0	24.5	1.8793	1.1439	91.1083
M14Apr2011	2011	Apr	M14	3	1.8	3.75	1.4	25.74	6.92	12.65	7.91	26.27	5.55	15.58	7.73	0	24.5	1.8793	1.1439	91.1083
M15Apr2011	2011	Apr	M15	1	1.8	4.4	1.3	24.27	7.36	1.15	7.98	24.07	6.87	1.15	7.94	0	23.2	0.8001	1.0932	111.3
M15Apr2011	2011	Apr	M15	2	1.8	4.4	1.3	24.27	7.36	1.15	7.98	24.07	6.87	1.15	7.94	0	23.2	0.8001	1.0932	111.3
M15Apr2011	2011	Apr	M15	3	1.8	4.4	1.3	24.27	7.36	1.15	7.98	24.07	6.87	1.15	7.94	0	23.2	0.8001	1.0932	111.3
M01Jul2011	2011	Jul	M01	1	1.7	5.35	0.9	29.32	4.5	7.96	7.96	29.31	4.09	0.82	7.95	1	29.2	1.4377	1.5877	114
M01Jul2011	2011	Jul	M01	2	1.7	5.35	0.9	29.32	4.5	7.96	7.96	29.31	4.09	0.82	7.95	1	29.2	1.4377	1.5877	114
M01Jul2011	2011	Jul	M01	3	1.7	5.35	0.9	29.32	4.5	7.96	7.96	29.31	4.09	0.82	7.95	1	29.2	1.4377	1.5877	114
M02Jul2011	2011	Jul	M02	1	1.6	8.08	0.6	29.45	3.54	2.29	7.88	29.51	2.9	2.45	7.84	0	26.8	1.0283	0.9004	192.6
M02Jul2011	2011	Jul	M02	2	1.6	8.08	0.6	29.45	3.54	2.29	7.88	29.51	2.9	2.45	7.84	0	26.8	1.0283	0.9004	192.6
M02Jul2011	2011	Jul	M02	3	1.6	8.08	0.6	29.45	3.54	2.29	7.88	29.51	2.9	2.45	7.84	0	26.8	1.0283	0.9004	192.6
M03Jul2011	2011	Jul	M03	1	2.9	3.69	1.1	29.05	5.59	8.87	8.33	29.77	1.7	19.39	8.05	1	28.9	1.165	1.46	274.057
M03Jul2011	2011	Jul	M03	2	2.9	3.69	1.1	29.05	5.59	8.87	8.33	29.77	1.7	19.39	8.05	1	28.9	1.165	1.46	274.057
M03Jul2011	2011	Jul	M03	3	2.9	3.69	1.1	29.05	5.59	8.87	8.33	29.77	1.7	19.39	8.05	1	28.9	1.165	1.46	274.057
M04Jul2011	2011	Jul	M04	1	1.7	4.72	0.9	29.61	4.56	17.14	8.29	29.9	2.6	19.01	8.19	0	30.9	1.961	1.017	294.824
M04Jul2011	2011	Jul	M04	2	1.7	4.72	0.9	29.61	4.56	17.14	8.29	29.9	2.6	19.01	8.19	0	30.9	1.961	1.017	294.824
M04Jul2011	2011	Jul	M04	3	1.7	4.72	0.9	29.61	4.56	17.14	8.29	29.9	2.6	19.01	8.19	0	30.9	1.961	1.017	294.824
M05Jul2011	2011	Jul	M05	1	2.2	3.95	1.5	29.1	5.26	21.34	8.4	29.53	4.75	26.44	8.44	1	28.2	3.485	2.004	205.9
M05Jul2011	2011	Jul	M05	2	2.2	3.95	1.5	29.1	5.26	21.34	8.4	29.53	4.75	26.44	8.44	1	28.2	3.485	2.004	205.9
M05Jul2011	2011	Jul	M05	3	2.2	3.95	1.5	29.1	5.26	21.34	8.4	29.53	4.75	26.44	8.44	1	28.2	3.485	2.004	205.9
M06Jul2011	2011	Jul	M06	1	2.9	3.44	1	28.41	6.54	24.16	8.47	28.25	6.05	29.32	8.57	0	27.1	2.729	0.87	209.514
M06Jul2011	2011	Jul	M06	2	2.9	3.44	1	28.41	6.54	24.16	8.47	28.25	6.05	29.32	8.57	0	27.1	2.729	0.87	209.514
M06Jul2011	2011	Jul	M06	3	2.9	3.44	1	28.41	6.54	24.16	8.47	28.25	6.05	29.32	8.57	0	27.1	2.729	0.87	209.514
M07Jul2011	2011	Jul	M07	1	2	2.55	1.6	27.6	7.67	30.49	8.66	26.41	8.55	33.06	8.74	0	29.3	1.387	0.968	85.2171
M07Jul2011	2011	Jul	M07	2	2	2.55	1.6	27.6	7.67	30.49	8.66	26.41	8.55	33.06	8.74	0	29.3	1.387	0.968	85.2171
M07Jul2011	2011	Jul	M07	3	2	2.55	1.6	27.6	7.67	30.49	8.66	26.41	8.55	33.06	8.74	0	29.3	1.387	0.968	85.2171
M08Jul2011	2011	Jul	M08	1	0.9	3.24	9.9	30.02	6.53	32.14	8.59	30.03	6.76	32.14	8.59	0	29.6	1.472	1.26	108.817
M08Jul2011	2011	Jul	M08	2	0.9	3.24	9.9	30.02	6.53	32.14	8.59	30.03	6.76	32.14	8.59	0	29.6	1.472	1.26	108.817
M08Jul2011	2011	Jul	M08	3	0.9	3.24	9.9	30.02	6.53	32.14	8.59	30.03	6.76	32.14	8.59	0	29.6	1.472	1.26	108.817
M09Jul2011	2011	Jul	M09	1	1.4	2.62	9.9	27.23	7.91	32.98	8.72	27.2	7.67	32.98	8.72	0	31.2	0.843	0.72	178.814
M09Jul2011	2011	Jul	M09	2	1.4	2.62	9.9	27.23	7.91	32.98	8.72	27.2	7.67	32.98	8.72	0	31.2	0.843	0.72	178.814
M09Jul2011	2011	Jul	M09	3	1.4	2.62	9.9	27.23	7.91	32.98	8.72	27.2	7.67	32.98	8.72	0	31.2	0.843	0.72	178.814
M10Jul2011	2011	Jul	M10	1	1.4	6.97	1	30.11	5.07	34.38	8.44	29.87	4.57	34.41	8.44	0	30	1.169	1.265	80.7917
M10Jul2011	2011	Jul	M10	2	1.4	6.97	1	30.11	5.07	34.38	8.44	29.87	4.57	34.41	8.44	0	30	1.169	1.265	80.7917
M10Jul2011	2011	Jul	M10	3	1.4	6.97	1	30.11	5.07	34.38	8.44	29.87	4.57	34.41	8.44	0	30	1.169	1.265	80.7917
M11Jul2011	2011	Jul	M11	1	1.9	9.1	1	30.75	6.8	35.43	8.44	30.14	5.1	35.64	8.46	0	30.6	1.347	1.067	79.315
M11Jul2011	2011	Jul	M11	2	1.9	9.1	1	30.75	6.8	35.43	8.44	30.14	5.1	35.64	8.46	0	30.6	1.347	1.067	79.315
M11Jul2011	2011	Jul	M11	3	1.9	9.1	1	30.75	6.8	35.43	8.44	30.14	5.1	35.64	8.46	0	30.6	1.347	1.067	79.315
M12Jul2011	2011	Jul	M12	1	1.3	3.69	9.9	26.96	8.12	33.8	8.58	26.9	7.86	33.8	8.58	0	29.6	1.215	0.889	165.017
M12Jul2011	2011	Jul	M12	2	1.3	3.69	9.9	26.96	8.12	33.8	8.58	26.9	7.86	33.8	8.58	0	29.6	1.215	0.889	165.017
M12Jul2011	2011	Jul	M12	3	1.3	3.69	9.9	26.96	8.12	33.8	8.58	26.9	7.86	33.8	8.58	0	29.6	1.215	0.889	165.017
M13Jul2011	2011	Jul	M13	1	1.2	4.48	9.9	28.78	6.61	33.48	8.46	28.75	6.48	33.48	8.47	0	31.6	1.165	1.118	183.167
M13Jul2011	2011	Jul	M13	2	1.2	4.48	9.9	28.78	6.61	33.48	8.46	28.75	6.48	33.48	8.47	0	31.6	1.165	1.118	183.167
M13Jul2011	2011	Jul	M13	3	1.2	4.48	9.9	28.78	6.61	33.48	8.46	28.75	6.48	33.48	8.47	0	31.6	1.165	1.118	183.167
M14Jul2011	2011	Jul	M14	1	2.5	4.29	1.2	29.81	5.14	13.2	8.23	29.95	3.21	15.46	8.09	1	31	1.351	1.252	91.1083
M14Jul2011	2011	Jul	M14	2	2.5	4.29	1.2	29.81	5.14	13.2	8.23	29.95	3.21	15.46	8.09	1	31	1.351	1.252	91.1083
M14Jul2011	2011	Jul	M14	3	2.5	4.29	1.2	29.81	5.14	13.2	8.23	29.95	3.21	15.46	8.09	1	31	1.351	1.252	91.1083
M01Oct2011	2011	Oct	M01	1	1.7	5.3	1	26.7	6.2	0.7	8.38	26.6	5.81	0.7	8.38	0	29.1	1.567	0.957	114
M01Oct2011	2011	Oct	M01	2	1.7	5.3	1	26.7	6.2	0.7	8.38	26.6	5.81	0.7	8.38	0	29.1	1.567	0.957	114
M01Oct2011	2011	Oct	M01	3	1.7	5.3	1	26.7	6.2	0.7	8.38	26.6	5.81	0.7	8.38	0	29.1	1.567	0.957	114
M02Oct2011	2011	Oct	M02	1	2.2	3.1	0.9	27	4.16	4.9	8.35	37.1	3.94	5.4	8.29	1	29.5	0.585	0.774	192.6
M02Oct2011	2011	Oct	M02	2	2.2	3.1	0.9	27	4.16	4.9	8.35	37.1	3.94	5.4	8.29	1	29.5	0.585	0.774	192.6
M02Oct2011	2011	Oct	M02	3	2.2	3.1	0.9	27	4.16	4.9	8.35	37.1	3.94	5.4	8.29	1	29.5	0.585	0.774	192.6
M03Oct2011	2011	Oct	M03	1	3.1	2.3	1.4	26.7	6.17	11.5	8.59	27.8	4.16	14	8.47	1	26.8	1.018	0.674	274.057
M03Oct2011	2011	Oct	M03	2	3.1	2.3	1.4	26.7	6.17	11.5	8.59	27.8	4.16	14	8.47	1	26.8	1.018	0.674	274.057
M03Oct2011	2011	Oct	M03	3	3.1	2.3	1.4	26.7	6.17	11.5	8.59	27.8	4.16	14	8.47	1	26.8	1.018	0.674	274.057
M04Oct2011	2011	Oct	M04	1	2	6.5	0.8	26.2	6.24	9.4	8.49	26.2	6.24	9.4	8.49	0	26.8	1.103	0.916	294.824
M04Oct2011	2011	Oct	M04	2	2	6.5	0.8	26.2	6.24	9.4	8.49	26.2	6.24	9.4	8.49	0	26.8	1.103	0.916	294.824
M04Oct2011	2011	Oct	M04	3	2	6.5	0.8	26.2	6.24	9.4	8.49	26.2	6.24	9.4	8.49	0	26.8	1.103	0.916	294.824
M05Oct2011	2011	Oct	M05	1	2.2	5.5	1.3	26.5	5.97	16.2	8.64	27	4.73	19.8	8.56	1	26.4	1.019	0.968	205.9
M05Oct2011	2011	Oct	M05	2	2.2	5.5	1.3	26.5	5.97	16.2	8.64	27	4.73	19.8	8.56	1	26.4	1.019	0.968	205.9
M05Oct2011	2011	Oct	M05	3	2.2	5.5	1.3	26.5	5.97	16.2	8.64	27	4.73	19.8	8.56	1	26.4	1.019	0.968	205.9
M06Oct2011	2011	Oct	M06	1	2.8	4	1.2	26.6	6.53	25.8	8.8	27.6	5.55	29.8	8.8	0	26.4	0.753	0.731	209.514
M06Oct2011	2011	Oct	M06	2	2.8	4	1.2	26.6	6.53	25.8	8.8	27.6	5.55	29.8	8.8	0	26.4	0.753	0.731	209.514
M06Oct2011	2011	Oct	M06	3	2.8	4	1.2	26.6	6.53	25.8	8.8	27.6	5.55	29.8	8.8	0	26.4	0.753	0.731	209.514
M07Oct2011	2011	Oct	M07	1	2.3	4.7	1.2	26.8	6.53	28.1	8.72	26.8	6.4	28.1	8.72	0	26.7	0.862	0.756	85.2171
M07Oct2011	2011	Oct	M07	2	2.3	4.7	1.2	26.8	6.53	28.1	8.72	26.8	6.4	28.1	8.72	0	26.7	0.862	0.756	85.2171
M07Oct2011	2011	Oct	M07	3	2.3	4.7	1.2	26.8	6.53	28.1	8.72	26.8	6.4	28.1	8.72	0	26.7	0.862	0.756	85.2171
M09Oct2011	2011	Oct	M09	1	1.5	7.5	1	26.3	6.69	30.8	8.72	26.3	6.55	30.8	8.72	0	26.7	0.983	0.824	178.814
M09Oct2011	2011	Oct	M09	2	1.5	7.5	1	26.3	6.69	30.8	8.72	26.3	6.55	30.8	8.72	0	26.7	0.983	0.824	178.814
M09Oct2011	2011	Oct	M09	3	1.5	7.5	1	26.3	6.69	30.8	8.72	26.3	6.55	30.8	8.72	0	26.7	0.983	0.824	178.814
M10Oct2011	2011	Oct	M10	1	1.8	13.9	1	25.1	5.66	30.4	8.72	25.6	5.7	30.4	8.43	0	26.4	1.354	1.021	80.7917
M10Oct2011	2011	Oct	M10	2	1.8	13.9	1	25.1	5.66	30.4	8.72	25.6	5.7	30.4	8.43	0	26.4	1.354	1.021	80.7917
M10Oct2011	2011	Oct	M10	3	1.8	13.9	1	25.1	5.66	30.4	8.72	25.6	5.7	30.4	8.43	0	26.4	1.354	1.021	80.7917
M11Oct2011	2011	Oct	M11	1	2.2	10	1	25.4	6.33	33.1	8.51	25.4	6.17	33.1	8.52	0	26.7	0.9055	0.8405	79.315
M11Oct2011	2011	Oct	M11	2	2.2	10	1	25.4	6.33	33.1	8.51	25.4	6.17	33.1	8.52	0	26.7	0.9055	0.8405	79.315
M11Oct2011	2011	Oct	M11	3	2.2	10	1	25.4	6.33	33.1	8.51	25.4	6.17	33.1	8.52	0	26.7	0.9055	0.8405	79.315
M12Oct2011	2011	Oct	M12	1	1.7	5	1.6	26.1	6.08	32.4	8.51	26.1	5.82	32.4	8.53	0	26.4	1.2381	0.9684	165.017
M12Oct2011	2011	Oct	M12	2	1.7	5	1.6	26.1	6.08	32.4	8.51	26.1	5.82	32.4	8.53	0	26.4	1.2381	0.9684	165.017
M12Oct2011	2011	Oct	M12	3	1.7	5	1.6	26.1	6.08	32.4	8.51	26.1	5.82	32.4	8.53	0	26.4	1.2381	0.9684	165.017
M13Oct2011	2011	Oct	M13	1	1.3	10.4	1	25.1	5.74	27.7	8.48	25.1	5.55	27.7	8.48	0	26.1	1.1693	0.7749	183.167
M13Oct2011	2011	Oct	M13	2	1.3	10.4	1	25.1	5.74	27.7	8.48	25.1	5.55	27.7	8.48	0	26.1	1.1693	0.7749	183.167
M13Oct2011	2011	Oct	M13	3	1.3	10.4	1	25.1	5.74	27.7	8.48	25.1	5.55	27.7	8.48	0	26.1	1.1693	0.7749	183.167
M14Oct2011	2011	Oct	M14	1	2.1	4.6	0.7	26.7	4.37	4.6	8.53	27.6	3.75	6.8	8.47	1	27.3	0.9422	0.7002	91.1083
M14Oct2011	2011	Oct	M14	2	2.1	4.6	0.7	26.7	4.37	4.6	8.53	27.6	3.75	6.8	8.47	1	27.3	0.9422	0.7002	91.1083
M14Oct2011	2011	Oct	M14	3	2.1	4.6	0.7	26.7	4.37	4.6	8.53	27.6	3.75	6.8	8.47	1	27.3	0.9422	0.7002	91.1083
M01Jan2012	2012	Jan	M01	1	1.6	5.5	1	15.7	9.32	0.6	8.09	15.7	9.26	0.6	8.03	0	19.3	1.3802	1.0362	114
M01Jan2012	2012	Jan	M01	2	1.6	5.5	1	15.7	9.32	0.6	8.09	15.7	9.26	0.6	8.03	0	19.3	1.3802	1.0362	114
M01Jan2012	2012	Jan	M01	3	1.6	5.5	1	15.7	9.32	0.6	8.09	15.7	9.26	0.6	8.03	0	19.3	1.3802	1.0362	114
M02Jan2012	2012	Jan	M02	1	1.6	4	1.1	16.9	8.41	5.5	8.1	16.7	7.96	7.5	8.09	1	16.8	0.9602	0.9863	192.6
M02Jan2012	2012	Jan	M02	2	1.6	4	1.1	16.9	8.41	5.5	8.1	16.7	7.96	7.5	8.09	1	16.8	0.9602	0.9863	192.6
M02Jan2012	2012	Jan	M02	3	1.6	4	1.1	16.9	8.41	5.5	8.1	16.7	7.96	7.5	8.09	1	16.8	0.9602	0.9863	192.6
M04Jan2012	2012	Jan	M04	1	1.8	3.8	1.4	15.2	10.11	8.8	8.23	16.1	7.84	17.2	8.19	0	16.1	0.5411	0.8029	294.824
M04Jan2012	2012	Jan	M04	2	1.8	3.8	1.4	15.2	10.11	8.8	8.23	16.1	7.84	17.2	8.19	0	16.1	0.5411	0.8029	294.824
M04Jan2012	2012	Jan	M04	3	1.8	3.8	1.4	15.2	10.11	8.8	8.23	16.1	7.84	17.2	8.19	0	16.1	0.5411	0.8029	294.824
M05Jan2012	2012	Jan	M05	1	2.3	2.6	1.8	14.5	8.62	19.3	8.21	16.3	7.42	25.2	8.38	1	14	1.4734	1.0294	205.9
M05Jan2012	2012	Jan	M05	2	2.3	2.6	1.8	14.5	8.62	19.3	8.21	16.3	7.42	25.2	8.38	1	14	1.4734	1.0294	205.9
M05Jan2012	2012	Jan	M05	3	2.3	2.6	1.8	14.5	8.62	19.3	8.21	16.3	7.42	25.2	8.38	1	14	1.4734	1.0294	205.9
M06Jan2012	2012	Jan	M06	1	3	3.6	1.6	15.7	8.33	25.3	8.24	15.6	8.27	27.5	8.26	0	11.9	0.8286	0.8763	209.514
M06Jan2012	2012	Jan	M06	2	3	3.6	1.6	15.7	8.33	25.3	8.24	15.6	8.27	27.5	8.26	0	11.9	0.8286	0.8763	209.514
M06Jan2012	2012	Jan	M06	3	3	3.6	1.6	15.7	8.33	25.3	8.24	15.6	8.27	27.5	8.26	0	11.9	0.8286	0.8763	209.514
M07Jan2012	2012	Jan	M07	1	2	3.9	1.5	17.6	7.94	29.6	8.29	17.8	7.77	30.4	8.3	0	18.1	0.9557	0.8751	85.2171
M07Jan2012	2012	Jan	M07	2	2	3.9	1.5	17.6	7.94	29.6	8.29	17.8	7.77	30.4	8.3	0	18.1	0.9557	0.8751	85.2171
M07Jan2012	2012	Jan	M07	3	2	3.9	1.5	17.6	7.94	29.6	8.29	17.8	7.77	30.4	8.3	0	18.1	0.9557	0.8751	85.2171
M09Jan2012	2012	Jan	M09	1	1.4	3.6	1.2	15.5	8.79	31	8.3	17.3	7.38	33.1	8.32	0	17.5	1.0415	0.9108	178.814
M09Jan2012	2012	Jan	M09	2	1.4	3.6	1.2	15.5	8.79	31	8.3	17.3	7.38	33.1	8.32	0	17.5	1.0415	0.9108	178.814
M09Jan2012	2012	Jan	M09	3	1.4	3.6	1.2	15.5	8.79	31	8.3	17.3	7.38	33.1	8.32	0	17.5	1.0415	0.9108	178.814
M10Jan2012	2012	Jan	M10	1	1.6	8.5	1.1	12.7	8.94	30.7	8.26	12.9	8.65	31.2	8.26	0	7.3	0.785	0.58	80.7917
M10Jan2012	2012	Jan	M10	2	1.6	8.5	1.1	12.7	8.94	30.7	8.26	12.9	8.65	31.2	8.26	0	7.3	0.785	0.58	80.7917
M10Jan2012	2012	Jan	M10	3	1.6	8.5	1.1	12.7	8.94	30.7	8.26	12.9	8.65	31.2	8.26	0	7.3	0.785	0.58	80.7917
M11Jan2012	2012	Jan	M11	1	1.4	3.6	1.8	13.9	7.88	31.3	8.16	13.9	8.06	31.3	8.22	0	8.1	0.952	0.375	79.315
M11Jan2012	2012	Jan	M11	2	1.4	3.6	1.8	13.9	7.88	31.3	8.16	13.9	8.06	31.3	8.22	0	8.1	0.952	0.375	79.315
M11Jan2012	2012	Jan	M11	3	1.4	3.6	1.8	13.9	7.88	31.3	8.16	13.9	8.06	31.3	8.22	0	8.1	0.952	0.375	79.315
M12Jan2012	2012	Jan	M12	1	1.4	5.1	1.4	17	7.55	33.3	8.24	17.1	7.65	33.5	8.31	0	12.9	0.497	0.559	165.017
M12Jan2012	2012	Jan	M12	2	1.4	5.1	1.4	17	7.55	33.3	8.24	17.1	7.65	33.5	8.31	0	12.9	0.497	0.559	165.017
M12Jan2012	2012	Jan	M12	3	1.4	5.1	1.4	17	7.55	33.3	8.24	17.1	7.65	33.5	8.31	0	12.9	0.497	0.559	165.017
M13Jan2012	2012	Jan	M13	1	1.4	4.2	1.4	14	8.62	29.2	8.2	15.6	8.02	31.6	8.25	0	11.2	0.479	0.665	183.167
M13Jan2012	2012	Jan	M13	2	1.4	4.2	1.4	14	8.62	29.2	8.2	15.6	8.02	31.6	8.25	0	11.2	0.479	0.665	183.167
M13Jan2012	2012	Jan	M13	3	1.4	4.2	1.4	14	8.62	29.2	8.2	15.6	8.02	31.6	8.25	0	11.2	0.479	0.665	183.167
M14Jan2012	2012	Jan	M14	1	2	3.6	1.3	15.1	8.96	4.1	8.1	15.4	8.43	10	8.14	0	17	0.702	0.576	91.1083
M14Jan2012	2012	Jan	M14	2	2	3.6	1.3	15.1	8.96	4.1	8.1	15.4	8.43	10	8.14	0	17	0.702	0.576	91.1083
M14Jan2012	2012	Jan	M14	3	2	3.6	1.3	15.1	8.96	4.1	8.1	15.4	8.43	10	8.14	0	17	0.702	0.576	91.1083
M15Jan2012	2012	Jan	M15	1	2	4.9	1.4	14.9	8.77	0.7	8.1	14	7.82	0.7	7.94	0	17.9	0.868	0.474	111.3
M15Jan2012	2012	Jan	M15	2	2	4.9	1.4	14.9	8.77	0.7	8.1	14	7.82	0.7	7.94	0	17.9	0.868	0.474	111.3
M15Jan2012	2012	Jan	M15	3	2	4.9	1.4	14.9	8.77	0.7	8.1	14	7.82	0.7	7.94	0	17.9	0.868	0.474	111.3
M01Apr2012	2012	Apr	M01	1	1.8	7	0.8	27.1	7.01	1.5	8.1	27.3	6.94	1.7	8.04	1	30.5	0.771	0.4	114
M01Apr2012	2012	Apr	M01	2	1.8	7	0.8	27.1	7.01	1.5	8.1	27.3	6.94	1.7	8.04	1	30.5	0.771	0.4	114
M01Apr2012	2012	Apr	M01	3	1.8	7	0.8	27.1	7.01	1.5	8.1	27.3	6.94	1.7	8.04	1	30.5	0.771	0.4	114
M02Apr2012	2012	Apr	M02	1	2	3.7	1.5	27.4	5.76	12.4	8.03	27.1	5.03	12.7	8.01	1	28.2	0.795	0.997	192.6
M02Apr2012	2012	Apr	M02	2	2	3.7	1.5	27.4	5.76	12.4	8.03	27.1	5.03	12.7	8.01	1	28.2	0.795	0.997	192.6
M02Apr2012	2012	Apr	M02	3	2	3.7	1.5	27.4	5.76	12.4	8.03	27.1	5.03	12.7	8.01	1	28.2	0.795	0.997	192.6
M03Apr2012	2012	Apr	M03	1	3	2.2	1.8	25.5	6.52	16.4	8.2	25.9	4.72	20.4	8.12	1	23.5	1.001	0.526	274.057
M03Apr2012	2012	Apr	M03	2	3	2.2	1.8	25.5	6.52	16.4	8.2	25.9	4.72	20.4	8.12	1	23.5	1.001	0.526	274.057
M03Apr2012	2012	Apr	M03	3	3	2.2	1.8	25.5	6.52	16.4	8.2	25.9	4.72	20.4	8.12	1	23.5	1.001	0.526	274.057
M04Apr2012	2012	Apr	M04	1	1.8	5.2	1.4	25.8	6.41	18.2	8.18	26.3	4.54	20.5	8.1	0	26.9	0.494	0.361	294.824
M04Apr2012	2012	Apr	M04	2	1.8	5.2	1.4	25.8	6.41	18.2	8.18	26.3	4.54	20.5	8.1	0	26.9	0.494	0.361	294.824
M04Apr2012	2012	Apr	M04	3	1.8	5.2	1.4	25.8	6.41	18.2	8.18	26.3	4.54	20.5	8.1	0	26.9	0.494	0.361	294.824
M05Apr2012	2012	Apr	M05	1	2.5	4.5	1.4	25.4	5.93	23	8.16	26	5.35	27.1	8.16	1	26.9	0.923	0.883	205.9
M05Apr2012	2012	Apr	M05	2	2.5	4.5	1.4	25.4	5.93	23	8.16	26	5.35	27.1	8.16	1	26.9	0.923	0.883	205.9
M05Apr2012	2012	Apr	M05	3	2.5	4.5	1.4	25.4	5.93	23	8.16	26	5.35	27.1	8.16	1	26.9	0.923	0.883	205.9
M06Apr2012	2012	Apr	M06	1	3	4.8	1.5	25.5	6.38	28.5	8.18	25.3	6.33	30.8	8.21	0	24.5	0.448	0.401	209.514
M06Apr2012	2012	Apr	M06	2	3	4.8	1.5	25.5	6.38	28.5	8.18	25.3	6.33	30.8	8.21	0	24.5	0.448	0.401	209.514
M06Apr2012	2012	Apr	M06	3	3	4.8	1.5	25.5	6.38	28.5	8.18	25.3	6.33	30.8	8.21	0	24.5	0.448	0.401	209.514
M07Apr2012	2012	Apr	M07	1	2.1	4.6	1.6	25.7	6.71	31.8	8.33	25.4	6.76	33	8.34	0	26.2	1.094	0.575	85.2171
M07Apr2012	2012	Apr	M07	2	2.1	4.6	1.6	25.7	6.71	31.8	8.33	25.4	6.76	33	8.34	0	26.2	1.094	0.575	85.2171
M07Apr2012	2012	Apr	M07	3	2.1	4.6	1.6	25.7	6.71	31.8	8.33	25.4	6.76	33	8.34	0	26.2	1.094	0.575	85.2171
M08Apr2012	2012	Apr	M08	1	1	5.2	1	27	6.8	33.4	8.32	26.8	6.73	33.7	8.31	0	27.1	1.297	0.594	108.817
M08Apr2012	2012	Apr	M08	2	1	5.2	1	27	6.8	33.4	8.32	26.8	6.73	33.7	8.31	0	27.1	1.297	0.594	108.817
M08Apr2012	2012	Apr	M08	3	1	5.2	1	27	6.8	33.4	8.32	26.8	6.73	33.7	8.31	0	27.1	1.297	0.594	108.817
M09Apr2012	2012	Apr	M09	1	1.4	4.6	1.4	26.2	6.69	34.2	8.42	26.1	6.63	34.2	8.42	0	24.6	0.691	0.498	178.814
M09Apr2012	2012	Apr	M09	2	1.4	4.6	1.4	26.2	6.69	34.2	8.42	26.1	6.63	34.2	8.42	0	24.6	0.691	0.498	178.814
M09Apr2012	2012	Apr	M09	3	1.4	4.6	1.4	26.2	6.69	34.2	8.42	26.1	6.63	34.2	8.42	0	24.6	0.691	0.498	178.814
M10Apr2012	2012	Apr	M10	1	1.6	4.6	1.6	25.7	6.38	35.1	8.33	25.7	6	35.1	8.34	0	20.9	0.553	0.55	80.7917
M10Apr2012	2012	Apr	M10	2	1.6	4.6	1.6	25.7	6.38	35.1	8.33	25.7	6	35.1	8.34	0	20.9	0.553	0.55	80.7917
M10Apr2012	2012	Apr	M10	3	1.6	4.6	1.6	25.7	6.38	35.1	8.33	25.7	6	35.1	8.34	0	20.9	0.553	0.55	80.7917
M11Apr2012	2012	Apr	M11	1	2.2	4.9	1.6	25.6	6.18	35.5	8.31	25.6	6.21	35.5	8.34	0	22.5	0.685	0.501	79.315
M11Apr2012	2012	Apr	M11	2	2.2	4.9	1.6	25.6	6.18	35.5	8.31	25.6	6.21	35.5	8.34	0	22.5	0.685	0.501	79.315
M11Apr2012	2012	Apr	M11	3	2.2	4.9	1.6	25.6	6.18	35.5	8.31	25.6	6.21	35.5	8.34	0	22.5	0.685	0.501	79.315
M12Apr2012	2012	Apr	M12	1	1.7	1.9	1.7	24.1	6.7	35	8.27	24.1	6.77	35	8.3	0	26.7	0.598	0.344	165.017
M12Apr2012	2012	Apr	M12	2	1.7	1.9	1.7	24.1	6.7	35	8.27	24.1	6.77	35	8.3	0	26.7	0.598	0.344	165.017
M12Apr2012	2012	Apr	M12	3	1.7	1.9	1.7	24.1	6.7	35	8.27	24.1	6.77	35	8.3	0	26.7	0.598	0.344	165.017
M13Apr2012	2012	Apr	M13	1	1.3	4.2	1.3	24.6	6.72	35.1	8.33	24.6	6.56	35.1	8.36	0	23.4	0.576	0.518	183.167
M13Apr2012	2012	Apr	M13	2	1.3	4.2	1.3	24.6	6.72	35.1	8.33	24.6	6.56	35.1	8.36	0	23.4	0.576	0.518	183.167
M13Apr2012	2012	Apr	M13	3	1.3	4.2	1.3	24.6	6.72	35.1	8.33	24.6	6.56	35.1	8.36	0	23.4	0.576	0.518	183.167
M14Apr2012	2012	Apr	M14	1	2.2	3.2	1.5	26	6.64	12	8.15	26.6	5.08	16.7	8.08	1	26.1	0.825	0.484	91.1083
M14Apr2012	2012	Apr	M14	2	2.2	3.2	1.5	26	6.64	12	8.15	26.6	5.08	16.7	8.08	1	26.1	0.825	0.484	91.1083
M14Apr2012	2012	Apr	M14	3	2.2	3.2	1.5	26	6.64	12	8.15	26.6	5.08	16.7	8.08	1	26.1	0.825	0.484	91.1083
M07Oct2012	2012	Oct	M07	1	1.9	6.95	1	28.4	5.16	26.42	8.13	28.4	5.13	32.33	8.3	0	27.4	1.941	1.057	85.2171
M07Oct2012	2012	Oct	M07	2	1.9	6.95	1	28.4	5.16	26.42	8.13	28.4	5.13	32.33	8.3	0	27.4	1.941	1.057	85.2171
M07Oct2012	2012	Oct	M07	3	1.9	6.95	1	28.4	5.16	26.42	8.13	28.4	5.13	32.33	8.3	0	27.4	1.941	1.057	85.2171
M08Oct2012	2012	Oct	M08	1	1.3	7.72	1	28.1	4.94	22.29	8.04	28.2	4.95	26.54	8.13	0	26.1	2.186	1.408	108.817
M08Oct2012	2012	Oct	M08	2	1.3	7.72	1	28.1	4.94	22.29	8.04	28.2	4.95	26.54	8.13	0	26.1	2.186	1.408	108.817
M08Oct2012	2012	Oct	M08	3	1.3	7.72	1	28.1	4.94	22.29	8.04	28.2	4.95	26.54	8.13	0	26.1	2.186	1.408	108.817
M09Oct2012	2012	Oct	M09	1	1.5	5.43	1	27.6	5.16	25.47	8.12	27.6	5.15	25.54	8.12	0	25.7	1.609	1.724	178.814
M09Oct2012	2012	Oct	M09	2	1.5	5.43	1	27.6	5.16	25.47	8.12	27.6	5.15	25.54	8.12	0	25.7	1.609	1.724	178.814
M09Oct2012	2012	Oct	M09	3	1.5	5.43	1	27.6	5.16	25.47	8.12	27.6	5.15	25.54	8.12	0	25.7	1.609	1.724	178.814
M01Jan2013	2013	Jan	M01	1	1.6	8.27	1	22.7	6.64	1.14	7.93	22.7	6.6	1.14	7.91	0	24.8	0.996	1.55	114
M01Jan2013	2013	Jan	M01	2	1.6	8.27	1	22.7	6.64	1.14	7.93	22.7	6.6	1.14	7.91	0	24.8	0.996	1.55	114
M01Jan2013	2013	Jan	M01	3	1.6	8.27	1	22.7	6.64	1.14	7.93	22.7	6.6	1.14	7.91	0	24.8	0.996	1.55	114
M02Jan2013	2013	Jan	M02	1	1.6	5.19	1	22.9	5.33	11.98	7.82	22.6	5.13	13.09	7.83	1	26.1	1.209	0.881	192.6
M02Jan2013	2013	Jan	M02	2	1.6	5.19	1	22.9	5.33	11.98	7.82	22.6	5.13	13.09	7.83	1	26.1	1.209	0.881	192.6
M02Jan2013	2013	Jan	M02	3	1.6	5.19	1	22.9	5.33	11.98	7.82	22.6	5.13	13.09	7.83	1	26.1	1.209	0.881	192.6
M03Jan2013	2013	Jan	M03	1	3.2	4.22	1.5	22.8	6.14	18.57	8.1	22.8	5.16	18.23	8.02	0	25.4	0.825	0.614	274.057
M03Jan2013	2013	Jan	M03	2	3.2	4.22	1.5	22.8	6.14	18.57	8.1	22.8	5.16	18.23	8.02	0	25.4	0.825	0.614	274.057
M03Jan2013	2013	Jan	M03	3	3.2	4.22	1.5	22.8	6.14	18.57	8.1	22.8	5.16	18.23	8.02	0	25.4	0.825	0.614	274.057
M04Jan2013	2013	Jan	M04	1	2	5	1.2	23.3	6.26	16.84	8.06	23.1	4.89	19.62	7.96	1	24.6	0.68	0.774	294.824
M04Jan2013	2013	Jan	M04	2	2	5	1.2	23.3	6.26	16.84	8.06	23.1	4.89	19.62	7.96	1	24.6	0.68	0.774	294.824
M04Jan2013	2013	Jan	M04	3	2	5	1.2	23.3	6.26	16.84	8.06	23.1	4.89	19.62	7.96	1	24.6	0.68	0.774	294.824
M06Jan2013	2013	Jan	M06	1	3.2	5.36	1.4	23.2	6.09	26.96	8.2	23.1	5.83	31.88	8.25	0	24.2	2.426	2.237	209.514
M06Jan2013	2013	Jan	M06	2	3.2	5.36	1.4	23.2	6.09	26.96	8.2	23.1	5.83	31.88	8.25	0	24.2	2.426	2.237	209.514
M06Jan2013	2013	Jan	M06	3	3.2	5.36	1.4	23.2	6.09	26.96	8.2	23.1	5.83	31.88	8.25	0	24.2	2.426	2.237	209.514
M07Jan2013	2013	Jan	M07	1	2	5.04	1.7	22.7	5.89	33.33	8.31	22.9	5.31	35.36	8.34	0	21.7	0.875	0.857	85.2171
M07Jan2013	2013	Jan	M07	2	2	5.04	1.7	22.7	5.89	33.33	8.31	22.9	5.31	35.36	8.34	0	21.7	0.875	0.857	85.2171
M07Jan2013	2013	Jan	M07	3	2	5.04	1.7	22.7	5.89	33.33	8.31	22.9	5.31	35.36	8.34	0	21.7	0.875	0.857	85.2171
M08Jan2013	2013	Jan	M08	1	1.1	7	1.1	22.6	5.41	32.18	8.24	22.6	5.53	32.13	8.24	0	21.9	1.058	0.773	108.817
M08Jan2013	2013	Jan	M08	2	1.1	7	1.1	22.6	5.41	32.18	8.24	22.6	5.53	32.13	8.24	0	21.9	1.058	0.773	108.817
M08Jan2013	2013	Jan	M08	3	1.1	7	1.1	22.6	5.41	32.18	8.24	22.6	5.53	32.13	8.24	0	21.9	1.058	0.773	108.817
M09Jan2013	2013	Jan	M09	1	1.6	8.55	1.2	22.5	5.76	34.36	8.27	22.5	5.14	34.34	8.26	0	21	0.919	1.008	178.814
M09Jan2013	2013	Jan	M09	2	1.6	8.55	1.2	22.5	5.76	34.36	8.27	22.5	5.14	34.34	8.26	0	21	0.919	1.008	178.814
M09Jan2013	2013	Jan	M09	3	1.6	8.55	1.2	22.5	5.76	34.36	8.27	22.5	5.14	34.34	8.26	0	21	0.919	1.008	178.814
M10Jan2013	2013	Jan	M10	1	1.9	6.37	1.5	22.5	5.74	34.41	8.25	22.6	5.75	34.42	8.26	0	23.9	0.5589	0.6682	80.7917
M10Jan2013	2013	Jan	M10	2	1.9	6.37	1.5	22.5	5.74	34.41	8.25	22.6	5.75	34.42	8.26	0	23.9	0.5589	0.6682	80.7917
M10Jan2013	2013	Jan	M10	3	1.9	6.37	1.5	22.5	5.74	34.41	8.25	22.6	5.75	34.42	8.26	0	23.9	0.5589	0.6682	80.7917
M11Jan2013	2013	Jan	M11	1	2.4	7.25	1.5	22.5	5.92	34.79	8.34	22.5	5.98	34.8	8.34	0	23.9	1.5396	0.8351	79.315
M11Jan2013	2013	Jan	M11	2	2.4	7.25	1.5	22.5	5.92	34.79	8.34	22.5	5.98	34.8	8.34	0	23.9	1.5396	0.8351	79.315
M11Jan2013	2013	Jan	M11	3	2.4	7.25	1.5	22.5	5.92	34.79	8.34	22.5	5.98	34.8	8.34	0	23.9	1.5396	0.8351	79.315
M12Jan2013	2013	Jan	M12	1	1.6	2.77	1.6	21.8	6.49	35.69	8.37	21.8	6.54	35.7	8.37	0	23.9	1.6416	1.4201	165.017
M12Jan2013	2013	Jan	M12	2	1.6	2.77	1.6	21.8	6.49	35.69	8.37	21.8	6.54	35.7	8.37	0	23.9	1.6416	1.4201	165.017
M12Jan2013	2013	Jan	M12	3	1.6	2.77	1.6	21.8	6.49	35.69	8.37	21.8	6.54	35.7	8.37	0	23.9	1.6416	1.4201	165.017
M13Jan2013	2013	Jan	M13	1	1.3	6.35	1.3	2.1	6.36	34.83	8.36	21.1	6.52	35.01	8.36	0	24.2	0.9583	1.1317	183.167
M13Jan2013	2013	Jan	M13	2	1.3	6.35	1.3	2.1	6.36	34.83	8.36	21.1	6.52	35.01	8.36	0	24.2	0.9583	1.1317	183.167
M13Jan2013	2013	Jan	M13	3	1.3	6.35	1.3	2.1	6.36	34.83	8.36	21.1	6.52	35.01	8.36	0	24.2	0.9583	1.1317	183.167
M14Jan2013	2013	Jan	M14	1	2.1	4.77	1.2	23	5.87	6.92	7.94	23	4.64	15.27	7.87	1	25.4	1.3127	1.8293	91.1083
M14Jan2013	2013	Jan	M14	2	2.1	4.77	1.2	23	5.87	6.92	7.94	23	4.64	15.27	7.87	1	25.4	1.3127	1.8293	91.1083
M14Jan2013	2013	Jan	M14	3	2.1	4.77	1.2	23	5.87	6.92	7.94	23	4.64	15.27	7.87	1	25.4	1.3127	1.8293	91.1083
M15Jan2013	2013	Jan	M15	1	2	6.86	1	23	5.64	0.95	7.85	22.1	4.25	0.99	7.71	1	25.3	0.7646	0.7558	111.3
M15Jan2013	2013	Jan	M15	2	2	6.86	1	23	5.64	0.95	7.85	22.1	4.25	0.99	7.71	1	25.3	0.7646	0.7558	111.3
M15Jan2013	2013	Jan	M15	3	2	6.86	1	23	5.64	0.95	7.85	22.1	4.25	0.99	7.71	1	25.3	0.7646	0.7558	111.3
M01Apr2013	2013	Apr	M01	1	1.6	6.88	1	24.5	7.1	3.34	8.19	24.6	7.4	3.47	8.18	1	26.7	1.8072	1.2103	114
M01Apr2013	2013	Apr	M01	2	1.6	6.88	1	24.5	7.1	3.34	8.19	24.6	7.4	3.47	8.18	1	26.7	1.8072	1.2103	114
M01Apr2013	2013	Apr	M01	3	1.6	6.88	1	24.5	7.1	3.34	8.19	24.6	7.4	3.47	8.18	1	26.7	1.8072	1.2103	114
M02Apr2013	2013	Apr	M02	1	1.7	3.7	1.3	24.4	6.16	14.53	8.01	24	5.87	15.31	7.98	1	27.4	1.5977	1.1062	192.6
M02Apr2013	2013	Apr	M02	2	1.7	3.7	1.3	24.4	6.16	14.53	8.01	24	5.87	15.31	7.98	1	27.4	1.5977	1.1062	192.6
M02Apr2013	2013	Apr	M02	3	1.7	3.7	1.3	24.4	6.16	14.53	8.01	24	5.87	15.31	7.98	1	27.4	1.5977	1.1062	192.6
M03Apr2013	2013	Apr	M03	1	2.7	2.83	1.7	22.5	6.45	22.96	8.23	22.4	5.6	25.37	8.2	0	21.8	0.9215	0.9724	274.057
M03Apr2013	2013	Apr	M03	2	2.7	2.83	1.7	22.5	6.45	22.96	8.23	22.4	5.6	25.37	8.2	0	21.8	0.9215	0.9724	274.057
M03Apr2013	2013	Apr	M03	3	2.7	2.83	1.7	22.5	6.45	22.96	8.23	22.4	5.6	25.37	8.2	0	21.8	0.9215	0.9724	274.057
M04Apr2013	2013	Apr	M04	1	1.6	5.32	1.2	23.5	6.06	21.23	8.13	22.8	5.2	24.48	8.1	0	23.1	0.818	0.6488	294.824
M04Apr2013	2013	Apr	M04	2	1.6	5.32	1.2	23.5	6.06	21.23	8.13	22.8	5.2	24.48	8.1	0	23.1	0.818	0.6488	294.824
M04Apr2013	2013	Apr	M04	3	1.6	5.32	1.2	23.5	6.06	21.23	8.13	22.8	5.2	24.48	8.1	0	23.1	0.818	0.6488	294.824
M06Apr2013	2013	Apr	M06	1	2.7	3.38	1.8	21.9	6.09	29.22	8.29	22.6	6	33.25	8.35	0	19.9	0.6559	0.7626	209.514
M06Apr2013	2013	Apr	M06	2	2.7	3.38	1.8	21.9	6.09	29.22	8.29	22.6	6	33.25	8.35	0	19.9	0.6559	0.7626	209.514
M06Apr2013	2013	Apr	M06	3	2.7	3.38	1.8	21.9	6.09	29.22	8.29	22.6	6	33.25	8.35	0	19.9	0.6559	0.7626	209.514
M07Apr2013	2013	Apr	M07	1	2.3	4.66	1.7	23.4	6.43	34.46	8.39	23.3	6.42	34.66	8.39	0	22.7	1.0969	0.9163	85.2171
M07Apr2013	2013	Apr	M07	2	2.3	4.66	1.7	23.4	6.43	34.46	8.39	23.3	6.42	34.66	8.39	0	22.7	1.0969	0.9163	85.2171
M07Apr2013	2013	Apr	M07	3	2.3	4.66	1.7	23.4	6.43	34.46	8.39	23.3	6.42	34.66	8.39	0	22.7	1.0969	0.9163	85.2171
M08Apr2013	2013	Apr	M08	1	1	7.03	1	23.5	6.45	34.49	8.37	23.5	6.45	34.5	8.37	0	23.8	0.6552	0.5229	108.817
M08Apr2013	2013	Apr	M08	2	1	7.03	1	23.5	6.45	34.49	8.37	23.5	6.45	34.5	8.37	0	23.8	0.6552	0.5229	108.817
M08Apr2013	2013	Apr	M08	3	1	7.03	1	23.5	6.45	34.49	8.37	23.5	6.45	34.5	8.37	0	23.8	0.6552	0.5229	108.817
M02Jul2013	2013	Jul	M02	1	2.1	10.1	0.6	30.5	4.34	0.53	7.78	30.4	4.29	0.53	7.76	1	27.4	4.138	2.458	192.6
M02Jul2013	2013	Jul	M02	2	2.1	10.1	0.6	30.5	4.34	0.53	7.78	30.4	4.29	0.53	7.76	1	27.4	4.138	2.458	192.6
M02Jul2013	2013	Jul	M02	3	2.1	10.1	0.6	30.5	4.34	0.53	7.78	30.4	4.29	0.53	7.76	1	27.4	4.138	2.458	192.6
M03Jul2013	2013	Jul	M03	1	3	21.6	0.5	29.5	6.06	0.62	8.44	29.1	5.65	0.61	8.35	1	26.6	4.398	2.941	274.057
M03Jul2013	2013	Jul	M03	2	3	21.6	0.5	29.5	6.06	0.62	8.44	29.1	5.65	0.61	8.35	1	26.6	4.398	2.941	274.057
M03Jul2013	2013	Jul	M03	3	3	21.6	0.5	29.5	6.06	0.62	8.44	29.1	5.65	0.61	8.35	1	26.6	4.398	2.941	274.057
M04Jul2013	2013	Jul	M04	1	1.7	22.5	0.5	29.1	6.1	0.26	8.1	29	5.84	0.26	8.07	1	26.3	16.709	8.196	294.824
M04Jul2013	2013	Jul	M04	2	1.7	22.5	0.5	29.1	6.1	0.26	8.1	29	5.84	0.26	8.07	1	26.3	16.709	8.196	294.824
M04Jul2013	2013	Jul	M04	3	1.7	22.5	0.5	29.1	6.1	0.26	8.1	29	5.84	0.26	8.07	1	26.3	16.709	8.196	294.824
M06Jul2013	2013	Jul	M06	1	2.6	15.7	0.6	29.4	5.69	1.74	8.41	28.1	4.86	26.77	8.42	0	24.7	17.452	17.583	209.514
M06Jul2013	2013	Jul	M06	2	2.6	15.7	0.6	29.4	5.69	1.74	8.41	28.1	4.86	26.77	8.42	0	24.7	17.452	17.583	209.514
M06Jul2013	2013	Jul	M06	3	2.6	15.7	0.6	29.4	5.69	1.74	8.41	28.1	4.86	26.77	8.42	0	24.7	17.452	17.583	209.514
M07Jul2013	2013	Jul	M07	1	2	11.2	1	28.9	6.12	10.49	8.53	28.1	6	23.03	8.47	1	25.3	5.34	3.171	85.2171
M07Jul2013	2013	Jul	M07	2	2	11.2	1	28.9	6.12	10.49	8.53	28.1	6	23.03	8.47	1	25.3	5.34	3.171	85.2171
M07Jul2013	2013	Jul	M07	3	2	11.2	1	28.9	6.12	10.49	8.53	28.1	6	23.03	8.47	1	25.3	5.34	3.171	85.2171
M08Jul2013	2013	Jul	M08	1	1.2	5.48	1.2	29.2	4.68	26.75	8.38	29.9	3.98	28.48	8.33	0	24.2	13.328	15.278	108.817
M08Jul2013	2013	Jul	M08	2	1.2	5.48	1.2	29.2	4.68	26.75	8.38	29.9	3.98	28.48	8.33	0	24.2	13.328	15.278	108.817
M08Jul2013	2013	Jul	M08	3	1.2	5.48	1.2	29.2	4.68	26.75	8.38	29.9	3.98	28.48	8.33	0	24.2	13.328	15.278	108.817
M09Jul2013	2013	Jul	M09	1	1.5	4.5	1.4	27.5	5.87	24.72	8.49	27.1	5.26	29.76	8.47	0	25.1	7.733	6.154	178.814
M09Jul2013	2013	Jul	M09	2	1.5	4.5	1.4	27.5	5.87	24.72	8.49	27.1	5.26	29.76	8.47	0	25.1	7.733	6.154	178.814
M09Jul2013	2013	Jul	M09	3	1.5	4.5	1.4	27.5	5.87	24.72	8.49	27.1	5.26	29.76	8.47	0	25.1	7.733	6.154	178.814
M10Jul2013	2013	Jul	M10	1	1.5	5.94	1.5	30.2	4.81	29.32	8.6	30.2	4.94	29.45	8.6	0	26	1.679	1.334	80.7917
M10Jul2013	2013	Jul	M10	2	1.5	5.94	1.5	30.2	4.81	29.32	8.6	30.2	4.94	29.45	8.6	0	26	1.679	1.334	80.7917
M10Jul2013	2013	Jul	M10	3	1.5	5.94	1.5	30.2	4.81	29.32	8.6	30.2	4.94	29.45	8.6	0	26	1.679	1.334	80.7917
M11Jul2013	2013	Jul	M11	1	1.8	3.62	1.8	28.8	2.73	29.52	8.58	28.8	3.14	29.52	8.58	0	25.8	1.005	0.965	79.315
M11Jul2013	2013	Jul	M11	2	1.8	3.62	1.8	28.8	2.73	29.52	8.58	28.8	3.14	29.52	8.58	0	25.8	1.005	0.965	79.315
M11Jul2013	2013	Jul	M11	3	1.8	3.62	1.8	28.8	2.73	29.52	8.58	28.8	3.14	29.52	8.58	0	25.8	1.005	0.965	79.315
M12Jul2013	2013	Jul	M12	1	1.6	3.09	1.3	26	1.11	29.33	8.32	26.4	1.1	25.08	8.27	0	27.6	10.742	9.658	165.017
M12Jul2013	2013	Jul	M12	2	1.6	3.09	1.3	26	1.11	29.33	8.32	26.4	1.1	25.08	8.27	0	27.6	10.742	9.658	165.017
M12Jul2013	2013	Jul	M12	3	1.6	3.09	1.3	26	1.11	29.33	8.32	26.4	1.1	25.08	8.27	0	27.6	10.742	9.658	165.017
M13Jul2013	2013	Jul	M13	1	0.6	2.78	0.6	27.7	1.05	27.85	8.3	27.6	1.05	27.9	8.29	0	27.6	2.221	3.472	183.167
M13Jul2013	2013	Jul	M13	2	0.6	2.78	0.6	27.7	1.05	27.85	8.3	27.6	1.05	27.9	8.29	0	27.6	2.221	3.472	183.167
M13Jul2013	2013	Jul	M13	3	0.6	2.78	0.6	27.7	1.05	27.85	8.3	27.6	1.05	27.9	8.29	0	27.6	2.221	3.472	183.167
M14Jul2013	2013	Jul	M14	1	2.2	18.6	0.5	29.2	5.69	0.26	8.15	29.2	5.68	0.26	8.1	1	25.4	11.154	5.13	91.1083
M14Jul2013	2013	Jul	M14	2	2.2	18.6	0.5	29.2	5.69	0.26	8.15	29.2	5.68	0.26	8.1	1	25.4	11.154	5.13	91.1083
M14Jul2013	2013	Jul	M14	3	2.2	18.6	0.5	29.2	5.69	0.26	8.15	29.2	5.68	0.26	8.1	1	25.4	11.154	5.13	91.1083
M15Jul2013	2013	Jul	M15	1	1.9	8.26	0.8	30.3	4.34	0.67	7.79	29.3	3.89	0.68	7.69	0	30.3	2.043	2.581	111.3
M15Jul2013	2013	Jul	M15	2	1.9	8.26	0.8	30.3	4.34	0.67	7.79	29.3	3.89	0.68	7.69	0	30.3	2.043	2.581	111.3
M15Jul2013	2013	Jul	M15	3	1.9	8.26	0.8	30.3	4.34	0.67	7.79	29.3	3.89	0.68	7.69	0	30.3	2.043	2.581	111.3
M01Oct2013	2013	Oct	M01	1	2	6.76	0.9	28.1	4.47	0.46	7.65	28.1	4.17	0.46	7.38	0	30.2	5.083	3.683	114
M01Oct2013	2013	Oct	M01	2	2	6.76	0.9	28.1	4.47	0.46	7.65	28.1	4.17	0.46	7.38	0	30.2	5.083	3.683	114
M01Oct2013	2013	Oct	M01	3	2	6.76	0.9	28.1	4.47	0.46	7.65	28.1	4.17	0.46	7.38	0	30.2	5.083	3.683	114
M02Oct2013	2013	Oct	M02	1	1.3	6.59	0.8	28	4.62	0.33	8.02	27.9	4.37	0.33	7.74	1	30.2	9.346	6.3417	192.6
M02Oct2013	2013	Oct	M02	2	1.3	6.59	0.8	28	4.62	0.33	8.02	27.9	4.37	0.33	7.74	1	30.2	9.346	6.3417	192.6
M02Oct2013	2013	Oct	M02	3	1.3	6.59	0.8	28	4.62	0.33	8.02	27.9	4.37	0.33	7.74	1	30.2	9.346	6.3417	192.6
M04Oct2013	2013	Oct	M04	1	2.1	11.1	0.5	17.8	6.04	0.21	7.86	27.8	5.76	0.21	7.69	1	27.7	13.1369	3.7279	294.824
M04Oct2013	2013	Oct	M04	2	2.1	11.1	0.5	17.8	6.04	0.21	7.86	27.8	5.76	0.21	7.69	1	27.7	13.1369	3.7279	294.824
M04Oct2013	2013	Oct	M04	3	2.1	11.1	0.5	17.8	6.04	0.21	7.86	27.8	5.76	0.21	7.69	1	27.7	13.1369	3.7279	294.824
M05Oct2013	2013	Oct	M05	1	2.7	5.16	0.6	27.8	5.44	3.03	7.91	28.5	4.31	7.62	7.59	1	27.2	14.2409	11.1978	205.9
M05Oct2013	2013	Oct	M05	2	2.7	5.16	0.6	27.8	5.44	3.03	7.91	28.5	4.31	7.62	7.59	1	27.2	14.2409	11.1978	205.9
M05Oct2013	2013	Oct	M05	3	2.7	5.16	0.6	27.8	5.44	3.03	7.91	28.5	4.31	7.62	7.59	1	27.2	14.2409	11.1978	205.9
M06Oct2013	2013	Oct	M06	1	3.2	4.23	0.7	27.8	5.27	7.91	7.63	28.5	4.26	21.6	7.67	0	27.7	7.7607	0.9273	209.514
M06Oct2013	2013	Oct	M06	2	3.2	4.23	0.7	27.8	5.27	7.91	7.63	28.5	4.26	21.6	7.67	0	27.7	7.7607	0.9273	209.514
M06Oct2013	2013	Oct	M06	3	3.2	4.23	0.7	27.8	5.27	7.91	7.63	28.5	4.26	21.6	7.67	0	27.7	7.7607	0.9273	209.514
M07Oct2013	2013	Oct	M07	1	2.3	3.96	1.1	28.8	6.22	21.4	7.92	28.1	5.04	29.25	7.93	0	28.1	9.3773	6.6871	85.2171
M07Oct2013	2013	Oct	M07	2	2.3	3.96	1.1	28.8	6.22	21.4	7.92	28.1	5.04	29.25	7.93	0	28.1	9.3773	6.6871	85.2171
M07Oct2013	2013	Oct	M07	3	2.3	3.96	1.1	28.8	6.22	21.4	7.92	28.1	5.04	29.25	7.93	0	28.1	9.3773	6.6871	85.2171
M08Oct2013	2013	Oct	M08	1	1.3	5.01	0.9	28.7	4.7	21.28	7.71	28.5	4.7	21.49	7.66	0	28.3	12.1138	2.9108	108.817
M08Oct2013	2013	Oct	M08	2	1.3	5.01	0.9	28.7	4.7	21.28	7.71	28.5	4.7	21.49	7.66	0	28.3	12.1138	2.9108	108.817
M08Oct2013	2013	Oct	M08	3	1.3	5.01	0.9	28.7	4.7	21.28	7.71	28.5	4.7	21.49	7.66	0	28.3	12.1138	2.9108	108.817
M09Oct2013	2013	Oct	M09	1	1.8	6.36	1	28.1	5.61	25.69	7.89	27.9	5.34	27.84	7.9	0	27.8	6.1242	3.5878	178.814
M09Oct2013	2013	Oct	M09	2	1.8	6.36	1	28.1	5.61	25.69	7.89	27.9	5.34	27.84	7.9	0	27.8	6.1242	3.5878	178.814
M09Oct2013	2013	Oct	M09	3	1.8	6.36	1	28.1	5.61	25.69	7.89	27.9	5.34	27.84	7.9	0	27.8	6.1242	3.5878	178.814
M10Oct2013	2013	Oct	M10	1	1.8	3.2	1.7	27.6	5.04	25.97	7.88	27.6	4.46	25.96	7.89	0	26.4	1.1689	0.9635	80.7917
M10Oct2013	2013	Oct	M10	2	1.8	3.2	1.7	27.6	5.04	25.97	7.88	27.6	4.46	25.96	7.89	0	26.4	1.1689	0.9635	80.7917
M10Oct2013	2013	Oct	M10	3	1.8	3.2	1.7	27.6	5.04	25.97	7.88	27.6	4.46	25.96	7.89	0	26.4	1.1689	0.9635	80.7917
M11Oct2013	2013	Oct	M11	1	2.3	6.34	1.1	27.6	5.7	28.6	7.89	27.6	5.55	28.64	7.89	0	26.6	4.6985	0.8417	79.315
M11Oct2013	2013	Oct	M11	2	2.3	6.34	1.1	27.6	5.7	28.6	7.89	27.6	5.55	28.64	7.89	0	26.6	4.6985	0.8417	79.315
M11Oct2013	2013	Oct	M11	3	2.3	6.34	1.1	27.6	5.7	28.6	7.89	27.6	5.55	28.64	7.89	0	26.6	4.6985	0.8417	79.315
M12Oct2013	2013	Oct	M12	1	2	2.61	2.61	27.9	5.88	32.23	7.91	28	5.18	35.07	7.94	0	27.4	3.2795	2.5024	165.017
M12Oct2013	2013	Oct	M12	2	2	2.61	2.61	27.9	5.88	32.23	7.91	28	5.18	35.07	7.94	0	27.4	3.2795	2.5024	165.017
M12Oct2013	2013	Oct	M12	3	2	2.61	2.61	27.9	5.88	32.23	7.91	28	5.18	35.07	7.94	0	27.4	3.2795	2.5024	165.017
M13Oct2013	2013	Oct	M13	1	1.6	6.9	0.9	27.7	5.16	27.3	7.9	27.8	4.99	29.1	7.9	0	27.6	5.4907	2.1909	183.167
M13Oct2013	2013	Oct	M13	2	1.6	6.9	0.9	27.7	5.16	27.3	7.9	27.8	4.99	29.1	7.9	0	27.6	5.4907	2.1909	183.167
M13Oct2013	2013	Oct	M13	3	1.6	6.9	0.9	27.7	5.16	27.3	7.9	27.8	4.99	29.1	7.9	0	27.6	5.4907	2.1909	183.167
M14Oct2013	2013	Oct	M14	1	3.1	10.9	0.5	27.7	5.04	0.2	8.07	27.6	5.08	0.2	7.75	0	28.6	5.1717	4.2202	91.1083
M14Oct2013	2013	Oct	M14	2	3.1	10.9	0.5	27.7	5.04	0.2	8.07	27.6	5.08	0.2	7.75	0	28.6	5.1717	4.2202	91.1083
M14Oct2013	2013	Oct	M14	3	3.1	10.9	0.5	27.7	5.04	0.2	8.07	27.6	5.08	0.2	7.75	0	28.6	5.1717	4.2202	91.1083
M11Jan2014	2014	Jan	M11	1	2.1	6.77	1	17.2	9.55	34.82	8.07	17.2	10.65	34.86	8.07	0	20.2	20.969	18.352	79.315
M11Jan2014	2014	Jan	M11	2	2.1	6.77	1	17.2	9.55	34.82	8.07	17.2	10.65	34.86	8.07	0	20.2	20.969	18.352	79.315
M11Jan2014	2014	Jan	M11	3	2.1	6.77	1	17.2	9.55	34.82	8.07	17.2	10.65	34.86	8.07	0	20.2	20.969	18.352	79.315
M12Jan2014	2014	Jan	M12	1	1.6	12.6	0.8	17.3	11.35	33.48	8.08	17.4	11.83	33.47	8.08	0	6.2	15.123	13.587	165.017
M12Jan2014	2014	Jan	M12	2	1.6	12.6	0.8	17.3	11.35	33.48	8.08	17.4	11.83	33.47	8.08	0	6.2	15.123	13.587	165.017
M12Jan2014	2014	Jan	M12	3	1.6	12.6	0.8	17.3	11.35	33.48	8.08	17.4	11.83	33.47	8.08	0	6.2	15.123	13.587	165.017
M14Jan2014	2014	Jan	M14	1	2.5	5.36	1	17.2	11.02	10.5	7.94	17.2	14.05	12.6	7.86	1	18.1	18.038	14.044	91.1083
M14Jan2014	2014	Jan	M14	2	2.5	5.36	1	17.2	11.02	10.5	7.94	17.2	14.05	12.6	7.86	1	18.1	18.038	14.044	91.1083
M14Jan2014	2014	Jan	M14	3	2.5	5.36	1	17.2	11.02	10.5	7.94	17.2	14.05	12.6	7.86	1	18.1	18.038	14.044	91.1083
M01Apr2014	2014	Apr	M01	1	1.5	9.53	0.6	25.1	6.87	0.98	8.18	25	6.7	0.98	8.13	0	78	20.371	17.948	114
M01Apr2014	2014	Apr	M01	2	1.5	9.53	0.6	25.1	6.87	0.98	8.18	25	6.7	0.98	8.13	0	78	20.371	17.948	114
M01Apr2014	2014	Apr	M01	3	1.5	9.53	0.6	25.1	6.87	0.98	8.18	25	6.7	0.98	8.13	0	78	20.371	17.948	114
M03Apr2014	2014	Apr	M03	1	2.9	1.78	1.7	23.6	7.05	17.77	8.22	24.5	4.25	20.56	7.93	1	78	16.828	17.432	274.057
M03Apr2014	2014	Apr	M03	2	2.9	1.78	1.7	23.6	7.05	17.77	8.22	24.5	4.25	20.56	7.93	1	78	16.828	17.432	274.057
M03Apr2014	2014	Apr	M03	3	2.9	1.78	1.7	23.6	7.05	17.77	8.22	24.5	4.25	20.56	7.93	1	78	16.828	17.432	274.057
M04Apr2014	2014	Apr	M04	1	1.6	7.12	1	23.6	6.65	19.37	8.09	24.1	5.4	20.97	8.03	1	80	19.333	19.453	294.824
M04Apr2014	2014	Apr	M04	2	1.6	7.12	1	23.6	6.65	19.37	8.09	24.1	5.4	20.97	8.03	1	80	19.333	19.453	294.824
M04Apr2014	2014	Apr	M04	3	1.6	7.12	1	23.6	6.65	19.37	8.09	24.1	5.4	20.97	8.03	1	80	19.333	19.453	294.824
M05Apr2014	2014	Apr	M05	1	2.3	5.68	1	23.4	6.12	25.41	8.15	23.5	6.07	26.87	8.17	1	25.6	20.829	18.843	205.9
M05Apr2014	2014	Apr	M05	1	2.3	5.68	1	23.4	6.12	25.41	8.15	23.5	6.07	26.87	8.17	1	25.6	20.829	18.843	205.9
M05Apr2014	2014	Apr	M05	1	2.3	5.68	1	23.4	6.12	25.41	8.15	23.5	6.07	26.87	8.17	1	25.6	20.829	18.843	205.9
M06Apr2014	2014	Apr	M06	1	2.9	5.08	1	23.3	6.2	30.03	8.22	23.1	5.94	31.24	8.24	0	77	20.676	16.219	209.514
M06Apr2014	2014	Apr	M06	2	2.9	5.08	1	23.3	6.2	30.03	8.22	23.1	5.94	31.24	8.24	0	77	20.676	16.219	209.514
M06Apr2014	2014	Apr	M06	3	2.9	5.08	1	23.3	6.2	30.03	8.22	23.1	5.94	31.24	8.24	0	77	20.676	16.219	209.514
M07Apr2014	2014	Apr	M07	1	2	5.2	1	23.1	6.5	33.31	8.27	23.1	6.51	33.59	8.27	0	80	20.347	17.525	85.2171
M07Apr2014	2014	Apr	M07	2	2	5.2	1	23.1	6.5	33.31	8.27	23.1	6.51	33.59	8.27	0	80	20.347	17.525	85.2171
M07Apr2014	2014	Apr	M07	3	2	5.2	1	23.1	6.5	33.31	8.27	23.1	6.51	33.59	8.27	0	80	20.347	17.525	85.2171
M09Apr2014	2014	Apr	M09	1	1.3	6.91	1	22.6	6.39	35.42	8.27	22.6	6.25	35.42	8.27	0	80	20.448	17.899	178.814
M09Apr2014	2014	Apr	M09	2	1.3	6.91	1	22.6	6.39	35.42	8.27	22.6	6.25	35.42	8.27	0	80	20.448	17.899	178.814
M09Apr2014	2014	Apr	M09	3	1.3	6.91	1	22.6	6.39	35.42	8.27	22.6	6.25	35.42	8.27	0	80	20.448	17.899	178.814
M11Apr2014	2014	Apr	M11	1	2	4.39	1.3	23.6	5.8	33.23	8.3	23.6	5.58	33.23	8.3	0	67	21.796	20.227	79.315
M11Apr2014	2014	Apr	M11	2	2	4.39	1.3	23.6	5.8	33.23	8.3	23.6	5.58	33.23	8.3	0	67	21.796	20.227	79.315
M11Apr2014	2014	Apr	M11	3	2	4.39	1.3	23.6	5.8	33.23	8.3	23.6	5.58	33.23	8.3	0	67	21.796	20.227	79.315
M14Apr2014	2014	Apr	M14	1	2	3.64	1.1	24.1	6.43	13.51	8.02	24.3	5.33	17.3	7.9	1	80	18.799	16.464	91.1083
M14Apr2014	2014	Apr	M14	2	2	3.64	1.1	24.1	6.43	13.51	8.02	24.3	5.33	17.3	7.9	1	80	18.799	16.464	91.1083
M14Apr2014	2014	Apr	M14	3	2	3.64	1.1	24.1	6.43	13.51	8.02	24.3	5.33	17.3	7.9	1	80	18.799	16.464	91.1083
M01Jul2014	2014	Jul	M01	1	1.5	10.8	1.4	28.3	4.89	0.6	7.75	28.4	4.52	0.66	7.33	0	29.8	18.584	12.9	114
M01Jul2014	2014	Jul	M01	2	1.5	10.8	1.4	28.3	4.89	0.6	7.75	28.4	4.52	0.66	7.33	0	29.8	18.584	12.9	114
M01Jul2014	2014	Jul	M01	3	1.5	10.8	1.4	28.3	4.89	0.6	7.75	28.4	4.52	0.66	7.33	0	29.8	18.584	12.9	114
M03Jul2014	2014	Jul	M03	1	3	4.88	0.7	29.2	5.78	4.21	7.54	29.3	0.93	9.87	7.19	0	29.3	15.16	12.153	274.057
M03Jul2014	2014	Jul	M03	2	3	4.88	0.7	29.2	5.78	4.21	7.54	29.3	0.93	9.87	7.19	0	29.3	15.16	12.153	274.057
M03Jul2014	2014	Jul	M03	3	3	4.88	0.7	29.2	5.78	4.21	7.54	29.3	0.93	9.87	7.19	0	29.3	15.16	12.153	274.057
M04Jul2014	2014	Jul	M04	1	1.7	15	0.4	29.2	4.09	1.8	7.22	29.2	2.49	7.62	7.18	1	31.2	20.067	18.018	294.824
M04Jul2014	2014	Jul	M04	1	1.7	15	0.4	29.2	4.09	1.8	7.22	29.2	2.49	7.62	7.18	1	31.2	20.067	18.018	294.824
M04Jul2014	2014	Jul	M04	1	1.7	15	0.4	29.2	4.09	1.8	7.22	29.2	2.49	7.62	7.18	1	31.2	20.067	18.018	294.824
M05Jul2014	2014	Jul	M05	1	2.3	5.91	0.6	29	3.79	10.75	7.39	29	2.85	17.9	7.48	0	29.7	20.1379	20.3791	205.9
M05Jul2014	2014	Jul	M05	2	2.3	5.91	0.6	29	3.79	10.75	7.39	29	2.85	17.9	7.48	0	29.7	20.1379	20.3791	205.9
M05Jul2014	2014	Jul	M05	3	2.3	5.91	0.6	29	3.79	10.75	7.39	29	2.85	17.9	7.48	0	29.7	20.1379	20.3791	205.9
M07Jul2014	2014	Jul	M07	1	2	6.41	0.5	29.2	5.21	20.15	7.72	28.5	4.85	28.14	7.83	0	28.4	19.0849	19.0264	85.2171
M07Jul2014	2014	Jul	M07	2	2	6.41	0.5	29.2	5.21	20.15	7.72	28.5	4.85	28.14	7.83	0	28.4	19.0849	19.0264	85.2171
M07Jul2014	2014	Jul	M07	3	2	6.41	0.5	29.2	5.21	20.15	7.72	28.5	4.85	28.14	7.83	0	28.4	19.0849	19.0264	85.2171
M09Jul2014	2014	Jul	M09	1	1.3	5.65	0.7	29.6	5.39	28.56	7.88	29.4	5.85	28.56	7.88	0	28.8	21.6841	21.2127	178.814
M09Jul2014	2014	Jul	M09	2	1.3	5.65	0.7	29.6	5.39	28.56	7.88	29.4	5.85	28.56	7.88	0	28.8	21.6841	21.2127	178.814
M09Jul2014	2014	Jul	M09	3	1.3	5.65	0.7	29.6	5.39	28.56	7.88	29.4	5.85	28.56	7.88	0	28.8	21.6841	21.2127	178.814
M11Jul2014	2014	Jul	M11	1	2	2.04	2	28.7	4.58	35.13	8.01	28.7	4.53	35.14	8.01	0	26	17.2119	16.4516	79.315
M11Jul2014	2014	Jul	M11	2	2	2.04	2	28.7	4.58	35.13	8.01	28.7	4.53	35.14	8.01	0	26	17.2119	16.4516	79.315
M11Jul2014	2014	Jul	M11	3	2	2.04	2	28.7	4.58	35.13	8.01	28.7	4.53	35.14	8.01	0	26	17.2119	16.4516	79.315
M14Jul2014	2014	Jul	M14	1	2.7	9.19	0.5	28.4	4.86	0.23	7.12	28.3	4.74	0.23	7.05	0	29.2	21.563	20.3841	91.1083
M14Jul2014	2014	Jul	M14	2	2.7	9.19	0.5	28.4	4.86	0.23	7.12	28.3	4.74	0.23	7.05	0	29.2	21.563	20.3841	91.1083
M14Jul2014	2014	Jul	M14	3	2.7	9.19	0.5	28.4	4.86	0.23	7.12	28.3	4.74	0.23	7.05	0	29.2	21.563	20.3841	91.1083

## Sheet: Bio
	Anadara floridana	Anadara sp.	Anadara transversa	Arcidae	Glycymeris sp.	Limidae	Caryocorbula sp.	Corbula caribaea	Corbula chittyana	Corbula contracta	Corbula sp.	Corbula swiftiana	Corbulidae	Varicorbula sp.	Sphenia antillensis	Sphenia sp.	Cyrtopleura Costata	Grippina sp.	Mytilidae	Amygdalum papyrium	Brachidontes domingensis	Brachidontes exustus	Lioberus castaneus	Modiolus americanus	Modiolus modiolus	Musculus lateralis	Brachidontes sp.	Nuculana acuta	Nuculana sp.	Nucula proxima	Nucula sp.	Anomia simplex	Crassostrea virginica	ostreidae	Cardiomya Costellata	Periploma margaritaceum	Cardiomya gemma	Cardiomya sp.	Lyonsia floridana	Lyonsia sp.	Periploma sp.	Asthenothaerus hemphilli	Asthenothaerus sp.	Bushia elegans	Thracia	Isognomon	Isognomon radiatus	Atrina sp.	Pinna carnea
M02Apr2007	0	0	0	0	0	0	0	0	0	0	0	0	0	0	0	0	0	0	0	0	0	0	0	0	0	0	0	0	0	0	0	0	0	0	0	0	0	0	0	0	0	0	0	0	0	0	0	0	0
M02Apr2007	0	0	0	0	0	0	0	0	0	0	0	0	0	0	0	0	0	0	0	0	0	0	0	0	0	0	0	0	0	0	0	0	0	0	0	0	0	0	0	0	0	0	0	0	0	0	0	0	0
M02Apr2007	0	0	0	0	0	0	0	0	0	0	0	0	0	0	0	0	0	0	0	0	0	0	0	0	0	0	0	0	0	0	0	0	0	0	0	0	0	0	0	0	0	0	0	0	0	0	0	0	0
M03Apr2007	0	0	0	0	0	0	0	0	0	0	0	0	0	0	0	0	0	0	0	0	0	0	0	0	0	0	0	0	0	0	0	0	0	0	0	0	0	0	0	0	0	0	0	0	0	0	0	0	0
M03Apr2007	0	0	0	0	0	0	0	0	0	0	0	0	0	0	0	0	0	0	0	0	0	0	0	0	0	0	0	0	0	0	0	0	0	0	0	0	0	0	0	0	0	0	0	0	0	0	0	0	0
M03Apr2007	0	0	0	0	0	0	0	0	0	0	0	0	0	0	0	0	0	0	0	0	0	0	0	0	0	0	0	0	0	0	0	0	0	0	0	0	0	0	0	0	0	0	0	0	0	0	0	0	0
M04Apr2007	0	0	0	0	0	0	0	0	0	0	0	0	0	0	0	0	0	0	0	0	0	0	0	0	0	0	0	0	0	0	0	0	0	0	0	0	0	0	0	0	0	0	0	0	0	0	0	0	0
M04Apr2007	0	0	0	0	0	0	0	0	0	0	0	0	0	0	0	0	0	0	0	0	0	0	0	0	0	0	0	0	0	0	0	0	0	0	0	0	0	0	0	0	0	0	0	0	0	0	0	0	0
M04Apr2007	0	0	0	0	0	0	0	0	0	0	0	0	0	0	0	0	0	0	0	0	0	0	0	0	0	0	0	0	0	0	0	0	0	0	0	0	0	0	0	0	0	0	0	0	0	0	0	0	0
M05Apr2007	0	0	0	0	0	0	0	0	0	0	0	0	0	0	0	0	0	0	0	0	0	0	0	0	0	0	0	0	0	0	0	0	0	0	0	0	0	0	0	0	0	0	0	0	0	0	0	0	0
M05Apr2007	0	0	0	0	0	0	0	0	0	0	0	0	0	0	0	0	0	0	0	0	0	0	0	0	0	0	0	0	0	0	0	0	0	0	0	0	0	0	0	0	0	0	0	0	0	0	0	0	0
M05Apr2007	0	0	0	0	0	0	0	0	0	0	0	0	0	0	0	0	0	0	0	0	0	0	0	0	0	0	0	0	0	0	0	0	0	0	0	0	0	0	0	0	0	0	0	0	0	0	0	0	0
M06Apr2007	0	0	0	0	0	0	0	0	0	0	0	0	0	0	0	0	0	0	0	0	0	0	0	0	0	0	0	0	0	0	0	0	0	0	0	0	0	0	0	0	0	1	0	0	0	0	0	0	0
M06Apr2007	0	0	0	0	0	0	0	0	0	0	0	0	0	0	0	0	0	0	0	0	0	0	0	0	0	0	0	0	0	0	0	0	0	0	0	0	0	0	0	0	0	0	0	0	0	0	0	0	0
M06Apr2007	0	0	0	0	0	0	0	0	0	0	0	0	0	0	0	0	0	0	0	0	0	0	0	0	0	0	0	0	0	0	0	0	0	0	0	0	0	0	0	0	0	0	0	0	0	0	0	0	0
M07Apr2007	0	0	0	0	0	0	0	0	0	0	0	0	0	0	0	0	0	0	0	0	0	0	0	0	0	0	0	0	0	0	0	0	0	0	0	0	0	0	2	0	0	1	0	0	0	0	0	0	0
M07Apr2007	0	0	0	0	0	0	0	0	0	0	0	0	0	0	3	0	0	0	0	0	0	0	0	0	0	0	0	0	0	3	0	0	0	0	0	0	0	0	4	0	0	1	0	0	0	0	0	0	0
M07Apr2007	0	0	0	0	0	0	0	0	0	0	2	0	0	0	0	0	0	0	0	0	0	0	0	0	0	0	0	0	0	0	0	0	0	0	0	0	0	0	2	0	0	2	0	0	0	0	0	0	0
M08Apr2007	0	0	0	0	0	0	0	0	0	0	0	0	0	0	0	0	0	0	0	0	0	0	0	0	0	0	0	0	0	1	0	0	0	0	0	0	0	0	2	0	0	2	0	0	0	0	0	0	0
M08Apr2007	0	0	0	0	0	0	0	0	0	0	0	0	0	0	0	0	0	0	0	0	0	0	0	0	0	0	0	0	0	1	0	0	0	0	0	0	0	0	0	0	0	0	0	0	0	0	0	0	0
M08Apr2007	0	0	0	0	0	0	0	0	0	0	0	0	0	0	0	0	0	0	0	0	0	0	0	0	0	0	0	0	0	1	0	0	0	0	0	0	0	0	1	0	0	0	0	0	0	0	0	0	0
M09Apr2007	0	0	0	0	0	0	0	0	0	0	1	0	0	0	0	0	0	0	0	0	0	0	0	0	0	0	0	0	0	7	0	0	0	0	0	0	0	0	1	0	0	0	0	0	0	0	0	0	0
M09Apr2007	0	0	0	0	0	0	0	0	0	0	0	0	0	0	0	0	0	0	0	0	0	0	0	0	0	0	0	0	0	1	0	0	0	0	0	0	0	0	0	0	0	0	0	0	0	0	0	0	0
M09Apr2007	0	0	0	0	0	0	0	0	0	0	0	0	0	0	0	0	0	0	0	0	0	0	0	0	0	0	0	0	0	1	0	0	0	0	0	0	0	0	4	0	0	0	0	0	0	0	0	0	0
M10Apr2007	0	0	0	0	0	0	0	0	0	0	0	0	0	0	0	0	0	0	0	0	0	0	0	0	0	0	0	0	0	0	0	0	0	0	0	0	0	0	0	0	0	0	0	0	0	0	0	0	0
M10Apr2007	0	0	0	0	0	0	0	0	0	0	0	0	0	0	0	0	0	0	0	0	0	0	0	0	0	0	0	0	0	0	0	0	0	0	0	0	0	0	1	0	0	0	0	0	0	0	0	0	0
M10Apr2007	0	0	0	0	0	0	0	0	0	0	1	0	0	0	0	0	0	0	0	0	0	0	0	0	0	0	0	0	0	0	0	0	0	0	0	0	0	0	0	0	0	0	0	0	0	0	0	0	0
M11Apr2007	0	0	0	0	0	0	0	0	0	0	0	0	0	0	0	0	0	0	0	0	0	0	0	0	0	0	0	0	0	3	0	0	0	0	0	0	0	0	0	0	0	0	0	0	0	0	0	0	0
M11Apr2007	0	0	0	0	0	0	0	0	0	0	0	0	0	0	0	0	0	0	0	0	0	0	0	0	0	0	0	0	0	6	0	0	0	0	0	0	0	0	0	0	0	0	0	0	0	0	0	0	0
M11Apr2007	0	0	0	0	0	0	0	0	0	1	0	0	0	0	0	0	0	0	0	0	0	0	0	0	0	0	0	0	0	3	0	0	0	0	0	0	0	0	0	0	0	0	0	0	0	0	0	0	0
M12Apr2007	0	0	0	0	0	0	0	0	0	0	0	0	0	0	0	0	0	0	0	0	0	0	0	0	0	0	0	0	0	1	0	0	0	0	0	0	0	0	3	0	0	0	0	0	0	0	0	0	0
M12Apr2007	0	0	0	0	0	0	0	0	0	0	0	0	0	0	0	0	0	0	0	0	0	0	0	0	0	0	0	0	0	0	0	0	0	0	0	0	0	0	1	0	0	0	0	0	0	0	0	0	0
M12Apr2007	0	0	0	0	0	0	0	0	0	1	0	0	0	0	1	0	0	0	0	1	0	0	0	0	0	0	0	0	0	21	0	0	0	0	0	0	0	0	6	0	0	0	0	0	0	0	0	0	0
M13Apr2007	0	0	0	0	0	0	0	0	0	0	0	0	0	0	0	0	0	0	0	0	0	0	0	0	0	0	0	0	0	0	0	0	0	0	0	0	0	0	0	0	0	0	0	0	0	0	0	0	0
M13Apr2007	0	0	0	0	0	0	0	0	0	0	0	0	0	0	0	0	0	0	0	0	0	1	0	0	0	0	0	0	0	0	0	0	0	0	0	0	0	0	0	0	0	0	0	0	0	0	0	0	0
M13Apr2007	0	0	0	0	0	0	0	0	0	0	0	0	0	0	0	0	0	0	0	0	0	0	0	0	0	0	0	0	0	2	0	0	0	0	0	0	0	0	1	0	0	0	0	0	0	0	0	0	0
M01Jul2007	0	0	0	0	0	0	0	0	0	0	0	0	0	0	0	0	0	0	0	0	0	0	0	0	0	0	0	0	0	0	0	0	0	0	0	0	0	0	0	0	0	0	0	0	0	0	0	0	0
M01Jul2007	0	0	0	0	0	0	0	0	0	0	0	0	0	0	0	0	0	0	0	0	0	0	0	0	0	0	0	0	0	0	0	0	0	0	0	0	0	0	0	0	0	0	0	0	0	0	0	0	0
M01Jul2007	0	0	0	0	0	0	0	0	0	0	0	0	0	0	0	0	0	0	0	0	0	0	0	0	0	0	0	0	0	0	0	0	0	0	0	0	0	0	0	0	0	0	0	0	0	0	0	0	0
M02Jul2007	0	0	0	0	0	0	0	0	0	0	0	0	0	0	0	0	0	0	0	8	0	0	0	0	0	0	0	0	0	0	0	0	0	0	0	0	0	0	0	0	0	0	0	0	0	0	0	0	0
M02Jul2007	0	0	0	0	0	0	0	0	0	0	0	0	0	0	0	0	0	0	0	8	0	0	0	0	0	0	0	0	0	0	0	0	0	0	0	0	0	0	0	0	0	0	0	0	0	0	0	0	0
M02Jul2007	0	0	0	0	0	0	0	0	0	0	0	0	0	0	0	0	0	0	0	0	0	0	0	0	0	0	0	0	0	0	0	0	0	0	0	0	0	0	10	0	0	0	0	0	0	0	0	0	0
M03Jul2007	0	0	0	0	0	0	0	0	0	0	0	0	0	0	0	0	0	0	0	0	0	0	0	0	0	0	0	0	0	0	0	0	0	0	0	0	0	0	0	0	0	0	0	0	0	0	0	0	0
M03Jul2007	0	0	0	0	0	0	0	0	0	0	0	0	0	0	0	0	0	0	0	0	0	0	0	0	0	0	0	0	0	0	0	0	0	0	0	0	0	0	0	0	0	0	0	0	0	0	0	0	0
M03Jul2007	0	0	0	0	0	0	0	0	0	0	0	0	0	0	0	0	0	0	0	0	0	0	0	0	0	0	0	0	0	0	0	0	0	0	0	0	0	0	0	0	0	0	0	0	0	0	0	0	0
M04Jul2007	0	0	0	0	0	0	0	0	0	0	0	0	0	0	0	0	0	0	0	0	0	0	0	0	0	0	0	0	0	0	0	0	0	0	0	0	0	0	0	0	0	0	0	0	0	0	0	0	0
M04Jul2007	0	0	0	0	0	0	0	0	0	0	0	0	0	0	0	0	0	0	0	0	0	0	0	0	0	0	0	0	0	0	0	0	0	0	0	0	0	0	0	0	0	0	0	0	0	0	0	0	0
M04Jul2007	0	0	0	0	0	0	0	0	0	0	0	0	0	0	0	0	0	0	0	0	0	0	0	0	0	0	0	0	0	0	0	0	0	0	0	0	0	0	0	0	0	0	0	0	0	0	0	0	0
M05Jul2007	0	0	0	0	0	0	0	0	0	0	0	0	0	0	0	0	0	0	0	0	0	0	0	0	0	0	0	0	0	0	0	0	0	0	0	0	0	0	0	0	0	0	0	0	0	0	0	0	0
M05Jul2007	0	0	0	0	0	0	0	0	0	0	0	0	0	0	0	0	0	0	0	0	0	0	0	0	0	0	0	0	0	0	0	0	0	0	0	0	0	0	0	0	0	0	0	0	0	0	0	0	0
M05Jul2007	0	0	0	0	0	0	0	0	0	0	0	0	0	0	0	0	0	0	0	0	0	0	0	0	0	0	0	0	0	0	0	0	0	0	0	0	0	0	0	0	0	0	0	0	0	0	0	0	0
M06Jul2007	0	0	0	0	0	0	0	0	0	0	0	0	0	0	0	0	0	0	0	0	0	0	0	0	0	0	0	0	0	0	0	0	0	0	0	0	0	0	0	0	0	0	0	0	0	0	0	0	0
M06Jul2007	0	0	0	0	0	0	0	0	0	0	0	0	0	0	0	0	0	0	0	0	0	0	0	0	0	0	0	0	0	0	0	0	0	0	0	0	1	0	0	0	0	0	0	0	0	0	0	0	0
M06Jul2007	0	0	0	0	0	0	0	0	0	0	0	0	0	0	0	0	0	0	0	0	0	0	0	0	0	0	0	0	0	0	0	0	0	0	0	0	0	0	0	0	0	0	0	0	0	0	0	0	0
M07Jul2007	0	0	0	0	0	0	0	0	0	0	0	0	0	0	0	0	0	0	0	0	0	0	0	0	0	0	0	0	0	0	0	0	0	0	0	0	1	0	0	0	0	0	0	0	0	0	0	0	0
M07Jul2007	0	0	0	0	0	0	0	0	0	0	0	0	0	0	0	0	0	0	0	0	0	0	0	0	0	0	0	0	0	1	0	0	0	0	0	0	0	0	4	0	0	1	0	0	0	0	0	0	0
M07Jul2007	0	0	0	0	0	0	0	0	0	0	0	0	0	0	0	0	0	0	0	0	0	0	0	0	0	0	0	0	0	7	0	0	0	0	0	0	0	0	0	0	0	2	0	0	0	0	0	0	0
M08Jul2007	0	0	0	0	0	0	0	0	0	0	0	0	0	0	1	0	0	0	0	0	0	0	0	0	0	0	0	0	0	0	0	0	0	0	0	0	0	0	1	0	0	3	0	0	0	0	0	0	0
M08Jul2007	0	0	0	0	0	0	0	0	0	0	0	0	0	0	0	0	0	0	0	0	0	0	0	0	0	0	0	2	0	1	0	0	0	0	0	0	0	0	0	0	0	0	0	0	0	0	0	0	0
M08Jul2007	0	0	0	0	0	0	0	0	0	0	0	0	0	0	0	0	0	0	0	0	0	0	0	0	0	0	0	0	0	0	0	0	0	0	0	0	0	0	0	0	0	3	0	0	0	0	0	0	0
M09Jul2007	0	0	0	0	0	0	0	0	0	0	1	0	0	0	0	0	0	0	0	0	0	0	0	0	0	0	0	0	0	4	0	0	0	0	0	0	0	0	0	0	0	0	0	0	0	0	0	0	0
M09Jul2007	0	0	0	0	0	0	0	0	0	0	0	0	0	0	0	0	0	0	0	0	0	0	0	0	0	0	0	0	0	2	0	0	0	0	0	0	0	0	2	0	0	0	0	0	0	0	0	0	0
M09Jul2007	0	0	0	0	0	0	0	0	0	0	0	0	0	0	0	0	0	0	0	0	0	0	0	0	0	0	0	0	0	9	0	0	0	0	0	0	0	0	0	0	0	0	0	0	0	0	0	0	0
M10Jul2007	0	0	0	0	0	0	0	0	0	0	0	0	0	0	0	0	0	0	0	1	0	0	0	0	0	0	0	0	0	0	0	0	0	0	0	0	1	0	0	0	0	0	0	0	0	0	0	0	0
M10Jul2007	0	0	0	0	0	0	0	0	0	0	0	0	0	0	0	0	0	0	0	1	0	0	0	0	0	0	0	0	0	0	0	0	0	0	0	0	0	0	0	0	0	0	0	0	0	0	0	0	0
M10Jul2007	0	0	0	0	0	0	0	0	0	0	0	0	0	0	0	0	0	0	0	0	0	0	0	0	0	0	0	0	0	0	0	0	0	0	0	0	0	0	0	0	0	0	0	0	0	0	0	0	0
M11Jul2007	0	0	0	0	0	0	0	0	0	0	0	0	0	0	0	0	0	0	0	0	0	0	0	0	0	0	0	0	0	3	0	0	0	0	0	0	0	0	0	0	0	0	0	0	0	0	0	0	0
M11Jul2007	0	0	0	0	0	0	0	0	0	0	0	0	0	0	0	0	0	0	0	0	0	0	0	0	0	0	0	0	0	4	0	0	0	0	0	0	0	0	0	0	0	0	0	0	0	0	0	0	0
M11Jul2007	0	0	0	0	0	0	0	0	0	0	1	0	0	0	0	0	0	0	0	0	0	0	0	0	0	0	0	0	0	3	0	0	0	0	0	0	0	0	0	0	0	0	0	0	0	0	0	0	0
M12Jul2007	0	0	0	0	0	0	0	0	0	0	0	0	0	0	0	0	0	0	0	0	0	0	0	0	0	0	0	0	0	49	0	0	0	0	0	0	0	0	0	0	0	0	0	0	0	0	0	0	0
M12Jul2007	0	1	0	0	0	0	0	0	0	0	0	0	0	0	0	0	0	0	0	0	0	0	0	0	0	0	0	0	0	36	0	0	0	0	0	0	0	0	0	0	0	0	0	0	0	0	0	0	0
M12Jul2007	0	1	0	0	0	0	0	0	0	0	0	0	0	0	0	0	0	0	0	0	0	0	0	0	0	0	0	0	0	50	0	0	0	0	0	0	0	0	1	0	0	0	0	0	0	0	0	0	0
M13Jul2007	0	0	0	0	0	0	0	0	0	0	0	0	0	0	0	0	0	0	0	0	0	0	0	0	0	0	0	0	0	9	0	0	0	0	0	0	0	0	0	0	0	0	0	0	0	0	0	0	0
M13Jul2007	0	0	0	0	0	0	0	0	0	0	0	0	0	0	0	0	0	0	0	0	0	0	0	0	0	0	0	0	0	3	0	0	0	0	0	0	0	0	0	0	0	0	0	0	0	0	0	0	0
M13Jul2007	0	0	0	0	0	0	0	0	0	0	0	0	0	0	1	0	0	0	0	0	0	0	0	0	0	0	0	0	0	0	0	0	0	0	0	0	0	0	0	0	0	0	0	0	0	0	0	0	0
M01Oct2007	0	0	0	0	0	0	0	0	0	0	0	0	0	0	0	0	0	0	0	0	0	0	0	0	0	0	0	0	0	0	0	0	0	0	0	0	0	0	0	0	0	0	0	0	0	0	0	0	0
M01Oct2007	0	0	0	0	0	0	0	0	0	0	0	0	0	0	0	0	0	0	0	0	0	0	0	0	0	0	0	0	0	0	0	0	0	0	0	0	0	0	0	0	0	0	0	0	0	0	0	0	0
M01Oct2007	0	0	0	0	0	0	0	0	0	0	0	0	0	0	0	0	0	0	0	0	0	0	0	0	0	0	0	0	0	0	0	0	0	0	0	0	0	0	0	0	0	0	0	0	0	0	0	0	0
M02Oct2007	0	0	0	0	0	0	0	0	0	0	0	0	0	0	0	0	0	0	0	0	0	0	0	0	0	0	0	0	0	0	0	0	0	0	0	0	0	0	0	0	0	0	0	0	0	0	0	0	0
M02Oct2007	0	0	0	0	0	0	0	0	0	0	0	0	0	0	0	0	0	0	0	0	0	0	0	0	0	0	0	0	0	0	0	0	0	0	0	0	0	0	0	0	0	0	0	0	0	0	0	0	0
M02Oct2007	0	0	0	0	0	0	0	0	0	0	0	0	0	0	0	0	0	0	0	0	0	0	0	0	0	0	0	0	0	0	0	0	0	0	0	0	0	0	0	0	0	0	0	0	0	0	0	0	0
M05Oct2007	0	0	0	0	0	0	0	0	0	0	0	0	0	0	0	0	0	0	0	0	0	0	0	0	0	0	0	0	0	0	0	0	0	0	0	0	0	0	0	0	0	0	0	0	0	0	0	0	0
M05Oct2007	0	0	0	0	0	0	0	0	0	0	0	0	0	0	0	0	0	0	0	0	0	0	0	0	0	0	0	0	0	0	0	0	0	0	0	0	0	0	0	0	0	0	0	0	0	0	0	0	0
M05Oct2007	0	0	0	0	0	0	0	0	0	0	0	0	0	0	0	0	0	0	0	0	0	0	0	0	0	0	0	0	0	0	0	0	0	0	0	0	0	0	0	0	0	0	0	0	0	0	0	0	0
M06Oct2007	0	0	0	0	0	0	0	0	0	0	0	0	0	0	0	0	0	0	0	0	0	0	0	0	0	0	0	0	0	0	0	0	0	0	0	0	0	0	0	0	0	0	0	0	0	0	0	0	0
M06Oct2007	0	0	0	0	0	0	0	0	0	0	0	0	0	0	0	0	0	0	0	0	0	0	0	0	0	0	0	0	0	0	0	0	0	0	0	0	0	0	0	0	0	0	0	0	0	0	0	0	0
M06Oct2007	0	0	0	0	0	0	0	0	0	0	0	0	0	0	0	0	0	0	0	0	0	0	0	0	0	0	0	0	0	0	0	0	0	0	0	0	0	0	0	0	0	0	0	0	0	0	0	0	0
M08Oct2007	0	0	0	0	0	0	0	0	0	0	2	0	0	0	0	0	0	0	0	0	0	0	0	0	0	0	0	0	0	0	0	0	0	0	0	0	0	0	0	0	0	0	0	0	0	0	0	0	0
M08Oct2007	0	0	0	0	0	0	0	0	0	0	0	0	0	0	0	0	0	0	0	0	0	0	0	0	0	0	0	0	0	0	0	0	0	0	0	0	0	0	0	0	0	0	0	0	0	0	0	0	0
M08Oct2007	0	0	0	0	0	0	0	0	0	0	0	0	0	0	0	0	0	0	0	0	0	0	0	0	0	0	0	0	0	0	0	0	0	0	0	0	0	0	0	0	0	0	0	0	0	0	0	0	0
M09Oct2007	0	0	0	0	0	0	0	0	0	0	1	0	0	0	0	0	0	0	0	0	0	0	0	0	0	0	0	0	0	0	0	0	0	0	0	0	0	0	0	0	0	0	0	0	0	0	0	0	0
M09Oct2007	0	0	0	0	0	0	0	0	0	5	0	0	0	0	0	0	0	0	0	0	0	0	0	0	0	0	0	0	0	3	0	0	0	0	0	0	0	0	0	0	0	0	0	0	0	0	0	0	0
M09Oct2007	0	0	0	0	0	0	0	0	0	1	0	0	0	0	0	0	0	0	0	1	0	0	0	0	0	0	0	0	0	1	0	0	0	0	0	0	0	0	0	0	0	0	0	0	0	0	0	0	0
M10Oct2007	0	0	0	0	0	0	0	0	0	0	0	0	0	0	0	0	0	0	0	0	0	0	0	0	0	0	0	0	0	0	0	0	0	0	0	0	0	0	0	0	0	0	0	0	0	0	0	0	0
M10Oct2007	0	0	0	0	0	0	0	0	0	0	0	0	0	0	0	0	0	0	0	0	0	0	0	0	0	0	0	0	0	1	0	0	0	0	0	0	0	0	0	0	0	0	0	0	0	0	0	0	0
M10Oct2007	0	0	0	0	0	0	0	0	0	0	0	0	0	0	0	0	0	0	0	0	0	0	0	0	0	0	0	0	0	0	0	0	0	0	0	0	0	0	0	0	0	0	0	0	0	0	0	0	0
M11Oct2007	0	0	0	0	0	0	0	0	0	0	0	0	0	0	0	0	0	0	0	0	0	0	0	0	0	0	0	0	0	0	0	0	0	0	0	0	0	0	0	0	0	0	0	0	0	0	0	0	0
M11Oct2007	0	0	0	0	0	0	0	0	0	0	0	0	0	0	0	0	0	0	0	0	0	0	0	0	0	0	0	0	0	0	0	0	0	0	0	0	0	0	0	0	0	0	0	0	0	0	0	0	0
M11Oct2007	0	0	0	0	0	0	0	0	0	0	0	0	0	0	0	0	0	0	0	0	0	0	0	0	0	0	0	0	0	0	0	0	0	0	0	0	0	0	0	0	0	0	0	0	0	0	0	0	0
M12Oct2007	0	0	0	0	0	0	0	0	0	0	0	0	0	0	0	0	0	0	0	0	0	0	0	0	0	0	0	0	0	37	0	0	0	0	0	0	0	0	0	0	0	0	0	0	0	0	0	0	0
M12Oct2007	0	0	0	0	0	0	0	0	0	0	1	0	0	0	0	0	0	0	0	0	0	0	0	0	0	0	0	0	0	46	0	0	0	0	0	0	0	0	0	0	0	0	0	0	0	0	0	0	0
M12Oct2007	0	0	0	0	0	0	0	0	0	0	1	0	0	0	0	0	0	0	0	0	0	0	0	0	0	0	0	0	0	11	0	0	0	0	0	0	0	0	0	0	0	0	0	0	0	0	0	0	0
M13Oct2007	4	0	0	0	0	0	0	0	0	0	0	0	0	0	0	0	0	0	0	1	0	0	0	0	0	0	0	0	0	0	0	0	0	0	0	0	0	0	0	0	0	0	0	0	0	0	0	0	0
M13Oct2007	1	0	0	0	0	0	0	0	0	0	0	0	0	0	0	0	0	0	0	0	0	0	0	0	0	0	0	0	0	2	0	0	0	0	0	0	0	0	0	0	0	0	0	0	0	0	0	0	0
M13Oct2007	1	0	0	0	0	0	0	0	0	0	0	0	0	0	0	0	0	0	0	0	0	0	0	0	0	0	0	0	0	4	0	0	0	0	0	0	0	0	1	0	0	0	0	0	0	0	0	0	0
M14Oct2007	0	0	0	0	0	0	0	0	0	0	0	0	0	0	0	0	0	0	0	0	0	0	0	0	0	0	0	0	0	0	0	0	0	0	0	0	0	0	0	0	0	0	0	0	0	0	0	0	0
M14Oct2007	0	0	0	0	0	0	0	0	0	0	0	0	0	0	0	0	0	0	0	0	0	0	0	0	0	0	0	0	0	0	0	0	0	0	0	0	0	0	0	0	0	0	0	0	0	0	0	0	0
M14Oct2007	0	0	0	0	0	0	0	0	0	0	0	0	0	0	0	0	0	0	0	0	0	0	0	0	0	0	0	0	0	0	0	0	0	0	0	0	0	0	0	0	0	0	0	0	0	0	0	0	0
M02Jan2008	0	0	0	0	0	0	0	0	0	0	0	0	0	0	0	0	0	0	0	0	0	0	0	0	0	0	0	0	0	0	0	0	0	0	0	0	0	0	0	0	0	0	0	0	0	0	0	0	0
M02Jan2008	0	0	0	0	0	0	0	0	0	0	0	0	0	0	0	0	0	0	0	0	0	0	0	0	0	0	0	0	0	0	0	0	0	0	0	0	0	0	0	0	0	0	0	0	0	0	0	0	0
M02Jan2008	0	0	0	0	0	0	0	0	0	0	0	0	0	0	0	0	0	0	0	0	0	0	0	0	0	0	0	0	0	0	0	0	0	0	0	0	0	0	0	0	0	0	0	0	0	0	0	0	0
M03Jan2008	0	0	0	0	0	0	0	0	0	0	0	0	0	0	0	0	0	0	0	0	0	0	0	0	0	0	0	0	0	0	0	0	0	0	0	0	0	0	0	0	0	0	0	0	0	0	0	0	0
M03Jan2008	0	0	0	0	0	0	0	0	0	0	0	0	0	0	0	0	0	0	0	0	0	0	0	0	0	0	0	0	0	0	0	0	0	0	0	0	0	0	0	0	0	0	0	0	0	0	0	0	0
M03Jan2008	0	0	0	0	0	0	0	0	0	0	0	0	0	0	0	0	0	0	0	0	0	0	0	0	0	0	0	0	0	0	0	0	0	0	0	0	0	0	0	0	0	0	0	0	0	0	0	0	0
M05Jan2008	0	0	0	0	0	0	0	0	0	0	0	0	0	0	0	0	0	0	0	0	0	0	0	0	0	0	0	0	0	0	0	0	0	0	0	0	0	0	0	0	0	0	0	0	0	0	0	0	0
M05Jan2008	0	0	0	0	0	0	0	0	0	0	0	0	0	0	0	0	0	0	0	0	0	0	0	0	0	0	0	0	0	0	0	0	0	0	0	0	0	0	0	0	0	0	0	0	0	0	0	0	0
M05Jan2008	0	0	0	0	0	0	0	0	0	0	0	0	0	0	0	0	0	0	0	0	0	0	0	0	0	0	0	0	0	0	0	0	0	0	0	0	0	0	0	0	0	0	0	0	0	0	0	0	0
M06Jan2008	0	0	0	0	0	0	0	0	0	0	0	0	0	0	0	0	0	0	0	0	0	0	0	0	0	0	0	0	0	0	0	0	0	0	0	0	0	0	0	0	0	0	0	0	0	0	0	0	0
M06Jan2008	0	0	0	0	0	0	0	0	0	0	0	0	0	0	0	0	0	0	0	0	0	0	0	0	0	0	0	0	0	0	0	0	0	0	0	0	0	0	0	0	0	0	0	0	0	0	0	0	0
M06Jan2008	0	0	0	0	0	0	0	0	0	0	0	0	0	0	0	0	0	0	0	0	0	0	0	0	0	0	0	0	0	0	0	0	0	0	0	0	0	0	0	0	0	0	0	0	0	0	0	0	0
M07Jan2008	0	0	0	0	0	0	0	0	0	0	0	0	0	0	0	0	0	0	0	0	0	0	0	0	0	0	0	0	0	2	0	0	0	0	0	0	0	0	1	0	0	0	0	0	0	0	0	0	0
M07Jan2008	0	1	0	0	0	0	0	0	0	0	0	0	0	0	0	0	0	0	0	0	0	0	0	0	0	0	0	0	0	2	0	0	0	0	0	0	0	0	0	0	0	0	0	0	0	0	0	0	0
M07Jan2008	0	1	0	0	0	0	0	0	0	0	1	0	0	0	0	0	0	0	0	0	0	0	0	0	0	0	0	0	0	0	0	0	0	0	0	0	0	0	1	0	0	0	0	0	0	0	0	0	0
M08Jan2008	0	0	0	0	0	0	0	0	0	0	1	0	0	0	0	0	0	0	0	0	0	0	0	0	0	0	0	0	0	0	0	0	0	0	0	0	0	0	1	0	0	1	0	0	0	0	0	0	0
M08Jan2008	0	0	0	0	0	0	0	0	0	0	0	0	0	0	0	0	0	0	0	0	0	0	0	0	0	0	0	0	0	0	0	0	0	0	0	0	0	0	1	0	0	0	0	0	0	0	0	0	0
M08Jan2008	0	0	0	0	0	0	0	0	0	0	4	0	0	0	0	0	0	0	0	0	0	0	0	0	0	0	0	0	0	1	0	0	0	0	0	0	0	0	0	0	0	0	0	0	0	0	0	0	0
M09Jan2008	0	0	0	0	0	0	0	0	0	0	0	0	0	0	0	0	0	0	0	0	0	0	0	0	0	0	0	0	0	2	0	0	0	0	0	0	0	0	0	0	0	0	0	0	0	0	0	0	0
M09Jan2008	0	0	0	0	0	0	0	0	0	0	0	0	0	0	0	0	0	0	0	0	0	0	0	0	0	0	0	0	0	1	0	0	0	0	0	0	0	0	1	0	0	0	0	0	0	0	0	0	0
M09Jan2008	0	0	0	0	0	0	0	0	0	0	0	0	0	0	0	0	0	0	0	0	0	0	0	0	0	0	0	0	0	0	0	0	0	0	0	0	0	0	0	0	0	0	0	0	0	0	0	0	0
M10Jan2008	0	0	0	0	0	0	0	0	0	0	0	0	0	0	0	0	0	0	0	0	0	0	0	0	0	0	0	0	0	0	0	0	0	0	0	0	0	0	0	0	0	0	0	0	0	0	0	0	0
M10Jan2008	0	0	0	0	0	0	0	0	0	0	0	0	0	0	0	0	0	0	0	0	0	0	0	0	0	0	0	0	0	0	0	0	0	0	0	0	0	0	0	0	0	0	0	0	0	0	0	0	0
M10Jan2008	0	0	0	0	0	0	0	0	0	0	0	0	0	0	0	0	0	0	0	1	0	0	0	0	0	0	0	0	0	0	0	0	0	0	0	0	0	0	0	0	0	0	0	0	0	0	0	0	0
M11Jan2008	0	0	0	0	0	0	0	0	0	0	0	0	0	0	0	1	0	0	0	0	0	0	0	0	0	0	0	0	0	0	0	0	0	0	0	0	0	0	1	0	0	0	1	0	0	0	0	0	0
M11Jan2008	0	0	0	0	0	0	0	0	0	0	0	0	0	0	0	0	0	0	0	0	0	0	0	0	0	0	0	0	0	0	0	0	0	0	0	0	0	0	0	0	0	0	1	0	0	0	0	0	0
M11Jan2008	0	0	0	0	0	0	0	0	0	0	2	0	0	0	0	0	0	0	0	0	0	0	0	0	0	0	0	0	0	1	0	0	0	0	0	0	0	0	1	0	0	0	2	0	0	0	0	0	0
M13Jan2008	0	0	0	0	0	0	0	0	0	0	0	0	0	0	0	0	0	0	0	1	0	0	0	0	0	0	0	0	0	0	0	0	0	0	0	0	0	0	0	0	0	0	0	0	0	0	0	0	0
M13Jan2008	0	0	0	0	0	0	0	0	0	0	0	0	0	0	0	0	0	0	0	0	0	0	0	0	0	0	0	0	0	0	0	0	0	0	0	0	0	0	0	0	0	0	0	0	0	0	0	0	0
M13Jan2008	0	0	0	0	0	0	0	0	0	0	0	0	0	0	0	0	0	0	0	0	0	0	0	0	0	1	0	0	0	1	0	0	0	0	0	0	0	0	1	0	0	0	0	0	0	0	0	0	0
M14Jan2008	0	0	0	0	0	0	0	0	0	0	0	0	0	0	0	0	0	0	0	0	0	0	0	0	0	0	0	0	0	0	0	0	0	0	0	0	0	0	0	0	0	0	0	0	0	0	0	0	0
M14Jan2008	0	0	0	0	0	0	0	0	0	0	0	0	0	0	0	0	0	0	0	0	0	0	0	0	0	0	0	0	0	0	0	0	0	0	0	0	0	0	0	0	0	0	0	0	0	0	0	0	0
M14Jan2008	0	0	0	0	0	0	0	0	0	0	0	0	0	0	0	0	0	0	0	0	0	0	0	0	0	0	0	0	0	0	0	0	0	0	0	0	0	0	0	0	0	0	0	0	0	0	0	0	0
M01Apr2008	0	0	0	0	0	0	0	0	0	0	0	0	0	0	0	0	0	0	0	0	0	0	0	0	0	0	0	0	0	0	0	0	0	0	0	0	0	0	0	0	0	0	0	0	0	0	0	0	0
M01Apr2008	0	0	0	0	0	0	0	0	0	0	0	0	0	0	0	0	0	0	0	0	0	0	0	0	0	0	0	0	0	0	0	0	0	0	0	0	0	0	0	0	0	0	0	0	0	0	0	0	0
M01Apr2008	0	0	0	0	0	0	0	0	0	0	0	0	0	0	0	0	0	0	0	0	0	0	0	0	0	0	0	0	0	0	0	0	0	0	0	0	0	0	0	0	0	0	0	0	0	0	0	0	0
M02Apr2008	0	0	0	0	0	0	0	0	0	0	0	0	0	0	0	0	0	0	0	0	0	0	0	0	0	0	0	0	0	0	0	0	0	0	0	0	0	0	0	0	0	0	0	0	0	0	0	0	0
M02Apr2008	0	0	0	0	0	0	0	0	0	0	0	0	0	0	0	0	0	0	0	0	0	0	0	0	0	0	0	0	0	0	0	0	0	0	0	0	0	0	0	0	0	0	0	0	0	0	0	0	0
M02Apr2008	0	0	0	0	0	0	0	0	0	0	0	0	0	0	0	0	0	0	0	0	0	1	0	0	0	0	0	0	0	0	0	0	0	0	0	0	0	0	0	0	0	0	0	0	0	0	0	0	0
M03Apr2008	0	0	0	0	0	0	0	0	0	0	0	0	0	0	0	0	0	0	0	0	0	0	0	0	0	0	0	0	0	0	0	0	0	0	0	0	0	0	0	0	0	0	0	0	0	0	0	0	0
M03Apr2008	0	0	0	0	0	0	0	0	0	0	0	0	0	0	0	0	0	0	0	0	0	0	0	0	0	0	0	0	0	0	0	0	0	0	0	0	0	0	0	0	0	0	0	0	0	0	0	0	0
M03Apr2008	0	0	0	0	0	0	0	0	0	0	0	0	0	0	0	0	0	0	0	0	0	0	0	0	0	0	0	0	0	0	0	0	0	0	0	0	0	0	0	0	0	0	0	0	0	0	0	0	0
M04Apr2008	0	0	0	0	0	0	0	0	0	0	0	0	0	0	0	0	0	0	0	0	0	0	0	0	0	0	0	0	0	0	0	0	0	0	0	0	0	0	0	0	0	0	0	0	0	0	0	0	0
M04Apr2008	0	0	0	0	0	0	0	0	0	0	0	0	0	0	0	0	0	0	0	0	0	0	0	0	0	0	0	0	0	0	0	0	0	0	0	0	0	0	0	0	0	0	0	0	0	0	0	0	0
M04Apr2008	0	0	0	0	0	0	0	0	0	0	0	0	0	0	0	0	0	0	0	0	0	0	0	0	0	0	0	0	0	0	0	0	0	0	0	0	0	0	0	0	0	0	0	0	0	0	0	0	0
M05Apr2008	0	0	0	0	0	0	0	0	0	0	0	0	0	0	0	0	0	0	0	0	0	0	0	0	0	0	0	0	0	0	0	0	0	0	0	0	0	0	0	0	0	0	0	0	0	0	0	0	0
M05Apr2008	0	0	0	0	0	0	0	0	0	0	0	0	0	0	0	0	0	0	0	0	0	0	0	0	0	0	0	0	0	0	0	0	0	0	0	0	0	0	0	0	0	0	0	0	0	0	0	0	0
M05Apr2008	0	0	0	0	0	0	0	0	0	0	0	0	0	0	0	0	0	0	0	0	0	0	0	0	0	0	0	0	0	0	0	0	0	0	0	0	0	0	0	0	0	0	0	0	0	0	0	0	0
M06Apr2008	0	0	0	0	0	0	0	0	0	0	0	0	0	0	0	0	0	0	0	0	0	0	0	0	0	0	0	0	0	0	0	0	0	0	0	0	0	0	0	0	0	0	0	0	0	0	0	0	0
M06Apr2008	0	0	0	0	0	0	0	0	0	0	0	0	0	0	0	0	0	0	0	0	0	0	0	0	0	0	0	0	0	0	0	0	0	0	0	0	0	0	0	0	0	0	0	0	0	0	0	0	0
M06Apr2008	0	0	0	0	0	0	0	0	0	0	0	0	0	0	0	0	0	0	0	0	0	0	0	0	0	0	0	0	0	0	0	0	0	0	0	0	0	0	0	0	0	0	0	0	0	0	0	0	0
M07Apr2008	0	0	0	0	0	0	0	0	0	0	0	0	0	0	0	0	0	0	0	0	0	0	0	0	0	0	0	0	0	0	0	0	0	0	0	0	0	0	2	0	0	1	0	0	0	0	0	0	0
M07Apr2008	0	0	0	0	0	0	0	0	0	0	0	0	0	0	0	0	0	0	0	0	0	0	0	0	0	0	0	0	0	0	0	0	0	0	0	0	0	0	0	0	0	4	0	0	0	0	0	0	0
M07Apr2008	0	0	0	0	0	0	0	0	0	0	0	1	0	0	0	0	0	0	0	0	0	0	0	0	0	0	0	0	0	0	0	0	0	0	0	0	0	0	1	0	0	0	0	0	0	0	0	0	0
M08Apr2008	0	0	0	0	0	0	0	0	0	0	0	0	0	0	0	0	0	0	0	0	0	0	0	0	0	0	0	0	0	1	0	0	0	0	0	0	0	0	0	0	0	0	0	0	0	0	0	0	0
M08Apr2008	0	0	0	0	0	0	0	0	0	0	1	0	0	0	0	0	0	0	0	0	0	0	0	0	0	0	0	0	0	0	0	0	0	0	0	0	0	0	2	0	0	0	0	0	0	0	0	0	0
M08Apr2008	0	0	0	0	0	0	0	0	0	0	0	0	0	0	0	0	0	0	0	0	0	0	0	0	0	0	0	0	0	1	0	0	0	0	0	0	0	0	3	0	0	0	0	0	0	0	0	0	0
M09Apr2008	0	0	0	0	0	0	0	0	0	0	0	1	0	0	0	0	0	0	0	0	0	0	0	0	0	0	0	0	0	3	0	0	0	0	0	0	0	0	2	0	0	0	0	0	0	0	0	0	0
M09Apr2008	0	0	0	0	0	0	0	0	0	0	0	1	0	0	0	1	0	0	0	0	0	0	0	0	0	0	0	0	0	3	0	0	0	0	0	0	2	0	10	0	0	0	0	0	0	0	0	0	0
M09Apr2008	0	0	0	0	0	0	0	0	0	0	0	0	0	0	0	0	0	0	0	0	0	0	0	0	0	0	0	0	0	0	0	0	0	0	0	0	0	0	2	0	0	1	0	0	0	0	0	0	0
M10Apr2008	0	0	0	0	0	0	0	0	0	0	0	0	0	0	0	0	0	0	0	1	0	0	0	0	0	0	0	0	0	0	0	0	0	0	0	0	0	0	0	0	0	1	0	0	0	0	0	0	0
M10Apr2008	0	0	0	0	0	0	0	0	0	0	0	0	0	0	0	0	0	0	0	34	0	0	0	0	0	0	0	0	0	2	0	0	0	0	0	0	0	0	0	0	0	0	0	0	0	0	0	0	0
M10Apr2008	0	0	0	0	0	0	0	0	0	0	0	0	0	0	0	0	0	0	0	2	0	0	0	0	0	0	0	0	0	0	0	0	0	0	0	0	0	0	0	0	0	1	0	0	0	0	0	0	0
M11Apr2008	0	0	0	0	0	0	0	0	0	0	0	0	0	0	0	0	0	0	0	0	0	0	0	0	0	0	0	0	0	1	0	0	0	0	0	0	0	0	0	0	0	0	0	0	0	0	0	0	0
M11Apr2008	0	0	0	0	0	0	0	0	0	5	0	1	0	0	0	0	0	0	0	0	0	0	0	0	0	0	0	0	0	6	0	0	0	0	0	0	0	0	0	0	0	0	0	0	0	0	0	0	0
M11Apr2008	0	0	0	0	0	0	0	0	0	2	0	0	0	0	0	0	0	0	0	0	0	0	0	0	0	0	0	0	0	0	0	0	0	0	0	0	0	0	0	0	0	1	0	0	0	0	0	0	0
M12Apr2008	0	0	0	0	0	0	0	0	0	0	0	0	0	0	0	0	0	0	0	0	0	0	0	0	0	0	0	0	0	0	0	0	0	0	0	0	0	0	2	0	0	0	0	0	0	0	0	0	0
M12Apr2008	0	3	0	0	0	0	0	0	0	0	0	0	0	0	0	0	0	0	0	0	0	0	0	0	0	0	0	0	0	9	0	0	0	0	0	0	0	0	0	0	0	0	0	0	0	0	0	0	0
M12Apr2008	0	4	0	0	0	0	0	0	0	0	0	0	0	0	0	0	0	0	0	0	0	0	0	0	0	0	0	0	0	19	0	0	0	0	0	0	0	0	0	0	0	0	0	0	0	0	0	0	0
M13Apr2008	0	0	0	2	0	0	0	0	0	0	0	0	0	0	0	0	0	0	0	0	0	0	0	0	0	0	0	0	0	0	0	0	0	0	0	0	0	0	0	0	0	0	0	0	0	0	0	0	0
M13Apr2008	0	0	0	2	0	0	0	0	0	0	0	0	0	0	0	0	0	0	0	0	0	0	0	0	0	0	0	0	0	0	0	0	0	0	0	0	0	0	0	0	0	0	0	0	0	0	0	0	0
M13Apr2008	0	1	0	0	0	0	0	0	0	0	0	0	0	0	0	0	0	0	0	0	0	0	0	0	0	0	0	0	0	0	0	0	0	0	0	0	0	0	0	0	0	0	0	0	0	0	0	0	0
M14Apr2008	0	0	0	0	0	0	0	0	0	0	0	0	0	0	0	0	0	0	0	0	0	0	0	0	0	0	0	0	0	0	0	0	0	0	0	0	0	0	0	0	0	0	0	0	0	0	0	0	0
M14Apr2008	0	0	0	0	0	0	0	0	0	0	0	0	0	0	0	0	0	0	0	0	0	0	0	0	0	0	0	0	0	0	0	0	0	0	0	0	0	0	0	0	0	0	0	0	0	0	0	0	0
M14Apr2008	0	0	0	0	0	0	0	0	0	0	0	0	0	0	0	0	0	0	0	0	0	0	0	0	0	0	0	0	0	0	0	0	0	0	0	0	0	0	0	0	0	0	0	0	0	0	0	0	0
M01Jul2008	0	0	0	0	0	0	0	0	0	0	0	0	0	0	0	0	0	0	0	0	0	0	0	0	0	0	0	0	0	0	0	0	0	0	0	0	0	0	0	0	0	0	0	0	0	0	0	0	0
M01Jul2008	0	0	0	0	0	0	0	0	0	0	0	0	0	0	0	0	0	0	0	0	0	0	0	0	0	0	0	0	0	0	0	0	0	0	0	0	0	0	0	0	0	0	0	0	0	0	0	0	0
M01Jul2008	0	0	0	0	0	0	0	0	0	0	0	0	0	0	0	0	0	0	0	0	0	0	0	0	0	0	0	0	0	0	0	0	0	0	0	0	0	0	0	0	0	0	0	0	0	0	0	0	0
M02Jul2008	0	0	0	0	0	0	0	0	0	0	0	0	0	0	0	0	0	0	0	0	0	1	0	0	0	0	0	0	0	0	0	0	0	0	0	0	0	0	0	0	0	0	0	0	0	0	0	0	0
M02Jul2008	0	0	0	0	0	0	0	0	0	0	0	0	0	0	0	0	0	0	0	0	0	4	0	0	0	0	0	0	0	0	0	0	0	0	0	0	0	0	0	0	0	0	0	0	0	0	0	0	0
M02Jul2008	0	0	0	0	0	0	0	0	0	0	0	0	0	0	0	0	0	0	0	0	0	1	0	0	0	0	0	0	0	0	0	0	0	0	0	0	0	0	0	0	0	0	0	0	0	0	0	0	0
M03Jul2008	0	0	0	0	0	0	0	0	0	0	0	0	0	0	0	0	0	0	0	0	0	0	0	0	0	0	0	0	0	0	0	0	0	0	0	0	0	0	0	0	0	0	0	0	0	0	0	0	0
M03Jul2008	0	0	0	0	0	0	0	0	0	0	0	0	0	0	0	0	0	0	0	0	0	0	0	0	0	0	0	0	0	0	0	0	0	0	0	0	0	0	0	0	0	0	0	0	0	0	0	0	0
M03Jul2008	0	0	0	0	0	0	0	0	0	0	0	0	0	0	0	0	0	0	0	0	0	0	0	0	0	0	0	0	0	0	0	0	0	0	0	0	0	0	0	0	0	0	0	0	0	0	0	0	0
M04Jul2008	0	0	0	0	0	0	0	0	0	0	0	0	0	0	0	0	0	0	0	0	0	0	0	0	0	0	0	0	0	0	0	0	0	0	0	0	0	0	0	0	0	0	0	0	0	0	0	0	0
M04Jul2008	0	0	0	0	0	0	0	0	0	0	0	0	0	0	0	0	0	0	0	0	0	0	0	0	0	0	0	0	0	0	0	0	0	0	0	0	0	0	0	0	0	0	0	0	0	0	0	0	0
M04Jul2008	0	0	0	0	0	0	0	0	0	0	0	0	0	0	0	0	0	0	0	0	0	0	0	0	0	0	0	0	0	0	0	0	0	0	0	0	0	0	0	0	0	0	0	0	0	0	0	0	0
M05Jul2008	0	0	0	0	0	0	0	0	0	0	0	0	0	0	0	0	0	0	0	0	0	0	0	0	0	0	0	0	0	0	0	0	0	0	0	0	0	0	0	0	0	0	0	0	0	0	0	0	0
M05Jul2008	0	0	0	0	0	0	0	0	0	0	0	0	0	0	0	0	0	0	0	0	0	0	0	0	0	0	0	0	0	0	0	0	0	0	0	0	0	0	0	0	0	0	0	0	0	0	0	0	0
M05Jul2008	0	0	0	0	0	0	0	0	0	0	0	0	0	0	0	0	0	0	0	0	0	0	0	0	0	0	0	0	0	0	0	0	0	0	0	0	0	0	0	0	0	0	0	0	0	0	0	0	0
M06Jul2008	0	0	0	0	0	0	0	0	0	0	0	0	0	0	0	0	0	0	0	0	0	0	0	0	0	0	0	0	0	0	0	0	0	0	0	0	0	0	0	0	0	0	0	0	0	0	0	0	0
M06Jul2008	0	0	0	0	0	0	0	0	0	0	0	0	0	0	0	0	0	0	0	1	0	0	0	0	0	0	0	0	0	0	0	0	0	0	0	0	0	0	0	0	0	0	0	0	0	0	0	0	0
M06Jul2008	0	0	0	0	0	0	0	0	0	0	0	0	0	0	0	0	0	0	0	1	0	0	0	0	0	0	0	0	0	0	0	0	0	0	0	0	0	0	0	0	0	0	0	0	0	0	0	0	0
M07Jul2008	0	0	0	0	0	0	0	0	0	1	0	0	0	0	0	0	0	0	0	0	0	0	0	0	0	0	0	0	0	1	0	0	0	0	0	0	0	0	1	0	0	4	0	0	0	0	0	0	0
M07Jul2008	0	0	0	0	0	0	0	0	0	1	0	0	0	0	0	0	0	0	0	0	0	0	0	0	0	0	0	0	0	1	0	0	0	0	0	0	0	0	0	0	0	0	0	0	0	0	0	0	0
M07Jul2008	0	0	0	0	0	0	0	0	0	0	0	0	0	0	0	0	0	0	0	0	0	0	0	0	0	0	0	0	0	0	0	0	0	0	0	0	0	0	0	0	0	0	0	0	0	0	0	0	0
M08Jul2008	0	0	0	0	0	0	0	0	0	2	0	0	0	0	0	0	0	0	0	0	0	0	0	0	0	0	0	0	0	1	0	0	0	0	0	0	1	0	1	0	0	5	0	0	0	0	0	0	0
M08Jul2008	0	0	0	0	0	0	0	0	0	1	0	0	0	0	0	0	0	0	0	0	0	0	0	0	0	0	0	0	0	0	0	0	0	0	0	0	0	0	0	0	0	0	0	0	0	0	0	0	0
M08Jul2008	0	0	0	0	0	0	0	0	0	5	0	0	0	0	0	0	0	0	0	0	0	0	0	0	0	0	0	0	0	1	0	0	0	0	0	0	0	0	0	0	0	1	0	0	0	0	0	0	0
M09Jul2008	0	0	0	0	0	0	0	0	0	0	0	0	0	0	0	0	0	0	0	0	0	0	0	0	0	0	0	0	0	1	0	0	0	0	0	0	0	0	0	0	0	0	0	0	0	0	0	0	0
M09Jul2008	0	0	0	0	0	0	0	0	0	0	0	0	0	0	0	0	0	0	0	0	0	0	0	0	0	0	0	0	0	6	0	0	0	0	0	0	0	0	1	0	0	0	0	0	0	0	0	0	0
M09Jul2008	0	0	0	0	0	0	0	0	0	0	0	0	0	0	0	0	0	0	0	0	0	0	0	0	0	0	0	0	0	1	0	0	0	0	0	0	0	0	0	0	0	0	0	0	0	0	0	0	0
M10Jul2008	0	0	0	0	0	0	0	0	0	0	0	0	0	0	0	0	0	0	0	0	0	0	0	0	0	0	0	0	0	0	0	0	0	0	0	0	0	0	0	0	0	0	0	0	0	0	0	0	0
M10Jul2008	0	0	0	0	0	0	0	0	0	0	0	0	0	0	0	0	0	0	0	0	0	0	0	0	0	0	0	0	0	0	0	0	0	0	0	0	0	0	0	0	0	0	0	0	0	0	0	0	0
M10Jul2008	0	0	0	0	0	0	0	0	0	0	0	0	0	0	0	0	0	0	0	0	0	0	0	0	0	0	0	0	0	0	0	0	0	0	0	0	0	0	3	0	0	0	0	0	0	0	0	0	0
M11Jul2008	0	0	0	0	0	0	0	0	0	0	1	0	0	0	0	0	0	0	0	0	0	0	0	0	0	0	0	0	0	0	0	0	0	0	0	0	0	0	0	0	0	0	0	0	0	0	0	0	0
M11Jul2008	0	0	0	0	0	0	0	0	0	0	3	0	0	0	0	0	0	0	0	0	0	0	0	0	0	0	0	0	0	0	0	0	0	0	0	0	0	0	0	0	0	0	0	0	0	0	0	0	0
M11Jul2008	0	0	0	0	0	0	0	0	0	0	4	0	0	0	0	0	0	0	0	0	0	0	0	0	0	0	0	0	0	2	0	0	0	0	0	0	0	0	0	0	0	0	0	0	0	0	0	0	0
M12Jul2008	0	1	0	0	0	0	0	0	0	0	0	0	0	0	0	0	0	0	0	0	0	0	0	0	0	0	0	0	0	6	0	0	0	0	0	0	0	0	0	0	0	1	0	0	0	0	0	0	0
M12Jul2008	0	1	0	0	0	0	0	0	0	0	0	2	0	0	0	0	0	0	0	0	0	0	0	0	0	0	0	0	0	4	0	0	0	0	0	0	0	0	0	0	0	0	0	0	0	0	0	0	0
M12Jul2008	0	0	0	0	0	0	0	0	0	0	0	0	0	0	0	0	0	0	0	0	0	0	0	0	0	0	0	0	0	6	0	0	0	0	0	0	0	0	0	0	0	0	0	0	0	0	0	0	0
M13Jul2008	0	0	0	0	0	0	0	0	0	0	0	0	0	0	0	0	0	0	0	0	0	0	0	0	0	0	0	0	0	0	0	0	0	0	0	0	0	0	0	0	0	0	0	0	0	0	0	0	0
M13Jul2008	0	0	0	0	0	0	0	0	0	0	0	0	0	0	0	0	0	0	0	0	0	0	0	0	0	0	0	0	0	0	0	0	0	0	0	0	0	0	0	0	0	0	0	0	0	0	0	0	0
M13Jul2008	0	0	0	0	0	0	0	0	0	0	0	0	0	0	0	0	0	0	0	0	0	0	0	0	0	0	0	0	0	0	0	0	0	0	0	0	0	0	1	0	0	0	0	0	0	0	0	0	0
M14Jul2008	0	0	0	0	0	0	0	0	0	0	0	0	0	0	0	0	0	0	0	0	0	0	0	0	0	0	0	0	0	0	0	0	0	0	0	0	0	0	0	0	0	0	0	0	0	0	0	0	0
M14Jul2008	0	0	0	0	0	0	0	0	0	0	0	0	0	0	0	0	0	0	0	0	0	0	0	0	0	0	0	0	0	0	0	0	0	0	0	0	0	0	0	0	0	0	0	0	0	0	0	0	0
M14Jul2008	0	0	0	0	0	0	0	0	0	0	0	0	0	0	0	0	0	0	0	0	0	0	0	0	0	0	0	0	0	0	0	0	0	0	0	0	0	0	0	0	0	0	0	0	0	0	0	0	0
M15Jul2008	0	0	0	0	0	0	0	0	0	0	0	0	0	0	0	0	0	0	0	0	0	0	0	0	0	0	0	0	0	0	0	0	0	0	0	0	0	0	0	0	0	0	0	0	0	0	0	0	0
M15Jul2008	0	0	0	0	0	0	0	0	0	0	0	0	0	0	0	0	0	0	0	0	0	0	0	0	0	0	0	0	0	0	0	0	0	0	0	0	0	0	0	0	0	0	0	0	0	0	0	0	0
M15Jul2008	0	0	0	0	0	0	0	0	0	0	0	0	0	0	0	0	0	0	0	0	0	0	0	0	0	0	0	0	0	0	0	0	0	0	0	0	0	0	0	0	0	0	0	0	0	0	0	0	0
M01Oct2008	0	0	0	0	0	0	0	0	0	0	0	0	0	0	0	0	0	0	0	0	0	0	0	0	0	0	0	0	0	0	0	0	0	0	0	0	0	0	0	0	0	0	0	0	0	0	0	0	0
M01Oct2008	0	0	0	0	0	0	0	0	0	0	0	0	0	0	0	0	0	0	0	0	0	0	0	0	0	0	0	0	0	0	0	0	0	0	0	0	0	0	0	0	0	0	0	0	0	0	0	0	0
M01Oct2008	0	0	0	0	0	0	0	0	0	0	0	0	0	0	0	0	0	0	0	0	0	0	0	0	0	0	0	0	0	0	0	0	0	0	0	0	0	0	0	0	0	0	0	0	0	0	0	0	0
M02Oct2008	0	0	0	0	0	0	0	0	0	0	0	0	0	0	0	0	0	0	0	0	0	0	0	0	0	0	0	0	0	0	0	0	0	0	0	0	0	0	0	0	0	0	0	0	0	0	0	0	0
M02Oct2008	0	0	0	0	0	0	0	0	0	0	0	0	0	0	0	0	0	0	0	0	0	0	0	0	0	0	0	0	0	0	0	0	0	0	0	0	0	0	0	0	0	0	0	0	0	0	0	0	0
M02Oct2008	0	0	0	0	0	0	0	0	0	0	0	0	0	0	0	0	0	0	0	0	0	0	0	0	0	0	0	0	0	0	0	0	0	0	0	0	0	0	0	0	0	0	0	0	0	0	0	0	0
M03Oct2008	0	0	0	0	0	0	0	0	0	0	0	0	0	0	0	0	0	0	0	0	0	0	0	0	0	0	0	0	0	0	0	0	0	0	0	0	0	0	0	0	0	0	0	0	0	0	0	0	0
M03Oct2008	0	0	0	0	0	0	0	0	0	0	5	0	0	0	0	0	0	0	0	0	0	0	0	0	0	0	0	0	0	0	0	0	0	0	0	0	0	0	0	0	0	0	0	0	0	0	0	0	0
M03Oct2008	0	0	0	0	0	0	0	0	0	0	0	0	0	0	0	0	0	0	0	0	0	0	0	0	0	0	0	0	0	0	0	0	0	0	0	0	0	0	0	0	0	0	0	0	0	0	0	0	0
M04Oct2008	0	0	0	0	0	0	0	0	0	0	0	0	0	0	0	0	0	0	0	0	0	0	0	0	0	0	0	0	0	0	0	0	0	0	0	0	0	0	0	0	0	0	0	0	0	0	0	0	0
M04Oct2008	0	0	0	0	0	0	0	0	0	0	0	0	0	0	0	0	0	0	0	0	0	0	0	0	0	0	0	0	0	0	0	0	0	0	0	0	0	0	0	0	0	0	0	0	0	0	0	0	0
M04Oct2008	0	0	0	0	0	0	0	0	0	0	0	0	0	0	0	0	0	0	0	0	0	0	0	0	0	0	0	0	0	0	0	0	0	0	0	0	0	0	0	0	0	0	0	0	0	0	0	0	0
M06Oct2008	0	0	0	0	0	0	0	0	0	0	0	0	0	0	0	0	0	0	0	0	0	0	0	0	0	0	0	0	0	0	0	0	0	0	0	0	0	0	0	0	0	0	0	0	0	0	0	0	0
M06Oct2008	0	0	0	0	0	0	0	0	0	0	0	0	0	0	0	0	0	0	0	0	0	0	0	0	0	0	0	0	0	0	0	0	0	0	0	0	0	0	0	0	0	0	0	0	0	0	0	0	0
M06Oct2008	0	0	0	0	0	0	0	0	0	0	0	0	0	0	0	0	0	0	0	0	0	0	0	0	0	0	0	0	0	0	0	0	0	0	0	0	0	0	0	0	0	0	0	0	0	0	0	0	0
M07Oct2008	0	0	0	0	0	0	0	0	0	0	0	0	0	0	0	0	0	0	0	2	0	0	0	0	0	0	0	0	0	0	0	0	0	0	0	0	0	0	0	0	0	0	0	0	0	0	0	0	0
M07Oct2008	0	0	0	0	0	0	0	0	0	0	0	0	0	0	1	0	0	0	0	0	0	0	0	0	0	0	0	0	0	0	0	0	0	0	0	0	0	0	0	0	0	0	0	0	0	0	0	0	0
M07Oct2008	0	0	0	0	0	0	0	0	0	0	0	0	0	0	1	0	0	0	0	1	0	0	0	0	0	0	0	0	0	0	0	0	0	0	0	0	0	0	0	0	0	0	0	0	0	0	0	0	0
M08Oct2008	0	0	0	0	0	0	0	0	0	0	1	0	0	0	0	0	0	0	0	0	0	0	0	0	0	0	0	0	0	10	0	0	0	0	0	0	0	0	0	0	0	0	0	0	0	0	0	0	0
M08Oct2008	0	0	0	0	0	0	0	0	0	0	2	0	0	0	0	0	0	0	0	0	0	0	0	0	0	0	0	0	0	3	0	0	0	0	0	0	0	0	0	0	0	0	0	0	0	0	0	0	0
M08Oct2008	0	0	0	0	0	0	0	0	0	0	4	0	0	0	0	0	0	0	0	0	0	0	0	0	0	0	0	1	0	15	0	0	0	0	0	0	0	0	0	0	0	0	0	0	0	0	0	0	0
M09Oct2008	0	0	0	0	0	0	0	0	0	0	0	0	0	0	0	0	0	0	0	0	0	0	0	0	0	0	0	0	0	3	0	0	0	0	0	0	0	0	0	0	0	0	0	0	0	0	0	0	0
M09Oct2008	0	0	0	0	0	0	0	0	0	0	4	0	0	0	0	0	0	0	0	0	0	0	0	0	0	0	0	0	0	4	0	0	0	0	0	0	0	0	1	0	0	0	0	0	0	0	0	0	0
M09Oct2008	0	0	0	0	0	0	0	0	0	0	1	0	0	0	0	1	0	0	0	0	0	0	0	0	0	0	0	0	0	3	0	0	0	0	0	0	0	0	0	0	0	0	0	0	0	0	0	0	0
M10Oct2008	0	0	0	0	0	0	0	0	0	0	0	0	0	0	0	0	0	0	0	3	0	0	0	0	0	0	0	0	0	0	0	0	0	0	0	0	0	0	0	0	0	0	0	0	0	0	0	0	0
M10Oct2008	0	0	0	0	0	0	0	0	0	0	0	0	0	0	0	0	0	0	0	1	0	0	0	0	0	0	0	0	0	0	0	0	0	0	0	0	0	0	0	0	0	0	0	0	0	0	0	0	0
M10Oct2008	0	0	0	0	0	0	0	0	0	0	0	0	0	0	0	0	0	0	0	13	0	0	0	0	0	0	0	0	0	0	0	0	0	0	0	0	0	0	0	0	0	0	0	0	0	0	0	0	0
M11Oct2008	0	0	0	0	0	0	0	0	0	0	2	0	0	0	0	0	0	0	0	0	0	0	0	0	0	0	0	0	0	2	0	0	0	0	0	0	0	0	3	0	0	0	0	0	0	0	0	0	0
M11Oct2008	0	0	0	0	0	0	0	0	0	0	1	0	0	0	0	0	0	0	0	0	0	0	0	0	0	0	0	0	0	0	0	0	0	0	0	0	0	0	2	0	0	0	0	0	0	0	0	0	0
M11Oct2008	0	0	0	0	0	0	0	0	0	0	2	0	0	0	0	0	0	0	0	0	0	0	0	0	0	0	0	0	0	0	0	0	0	0	0	0	0	0	0	0	0	0	0	0	0	0	0	0	0
M12Oct2008	0	0	0	0	0	0	0	0	0	0	0	0	0	0	0	0	0	0	0	0	0	0	0	0	0	0	0	0	0	2	0	0	0	0	0	0	0	0	1	0	0	0	0	0	0	0	0	0	0
M12Oct2008	0	0	0	0	0	0	0	0	0	0	0	0	0	0	0	0	0	0	0	0	0	0	0	0	0	0	0	0	0	24	0	0	0	0	0	0	0	0	2	0	0	0	0	0	0	0	0	0	0
M12Oct2008	0	0	0	0	0	0	0	0	0	0	0	0	0	0	0	0	0	0	0	0	0	0	0	0	0	0	0	0	0	20	0	0	0	0	0	0	0	0	1	0	0	0	0	0	0	0	0	0	0
M13Oct2008	0	0	0	0	0	0	0	0	0	0	0	0	0	0	0	0	0	0	0	4	0	0	0	0	0	0	0	0	0	1	0	0	0	0	0	0	0	0	0	0	0	0	0	0	0	0	0	0	0
M13Oct2008	0	0	0	0	0	0	0	0	0	0	0	0	0	0	0	0	0	0	0	0	0	0	0	0	0	0	0	0	0	0	0	0	0	0	0	0	0	0	0	0	0	0	0	0	0	0	0	0	0
M13Oct2008	0	0	0	0	0	0	0	0	0	0	0	0	0	0	0	0	0	0	0	0	0	0	0	0	0	0	0	0	0	0	0	0	0	0	0	0	0	0	0	0	0	0	0	0	0	0	0	0	0
M14Oct2008	0	0	0	0	0	0	0	0	0	0	0	0	0	0	0	0	0	0	0	0	0	0	0	0	0	0	0	0	0	0	0	0	0	0	0	0	0	0	0	0	0	0	0	0	0	0	0	0	0
M14Oct2008	0	0	0	0	0	0	0	0	0	0	0	0	0	0	0	0	0	0	0	0	0	0	0	0	0	0	0	0	0	0	0	0	0	0	0	0	0	0	0	0	0	0	0	0	0	0	0	0	0
M14Oct2008	0	0	0	0	0	0	0	0	0	0	0	0	0	0	0	0	0	0	0	0	0	0	0	0	0	0	0	0	0	0	0	0	0	0	0	0	0	0	0	0	0	0	0	0	0	0	0	0	0
M02Jan2009	0	0	0	0	0	0	0	0	0	0	0	0	0	0	0	0	0	0	0	1	0	0	0	0	0	0	0	0	0	0	0	0	0	0	0	0	0	0	0	0	0	0	0	0	0	0	0	0	0
M02Jan2009	0	0	0	0	0	0	0	0	0	0	0	0	0	0	0	0	0	0	0	0	0	0	0	0	0	0	0	0	0	0	0	0	0	0	0	0	0	0	0	0	0	0	0	0	0	0	0	0	0
M02Jan2009	0	0	0	0	0	0	0	0	0	0	0	0	0	0	0	0	0	0	0	0	0	0	0	0	0	0	0	0	0	0	0	0	0	0	0	0	0	0	0	0	0	0	0	0	0	0	0	0	0
M03Jan2009	0	0	0	0	0	0	0	0	0	0	0	0	0	0	0	0	0	0	0	0	0	0	0	0	0	0	0	0	0	0	0	0	0	0	0	0	0	0	0	0	0	0	0	0	0	0	0	0	0
M03Jan2009	0	0	0	0	0	0	0	0	0	0	0	0	0	0	0	0	0	0	0	0	0	0	0	0	0	0	0	0	0	0	0	0	0	0	0	0	0	0	0	0	0	0	0	0	0	0	0	0	0
M03Jan2009	0	0	0	0	0	0	0	0	0	0	0	0	0	0	0	0	0	0	0	0	0	0	0	0	0	0	0	0	0	0	0	0	0	0	0	0	0	0	0	0	0	0	0	0	0	0	0	0	0
M04Jan2009	0	0	0	0	0	0	0	0	0	0	0	0	0	0	0	0	0	0	0	0	0	0	0	0	0	0	0	0	0	0	0	0	0	0	0	0	0	0	0	0	0	0	0	0	0	0	0	0	0
M04Jan2009	0	0	0	0	0	0	0	0	0	0	0	0	0	0	0	0	0	0	0	0	0	0	0	0	0	0	0	0	0	0	0	0	0	0	0	0	0	0	0	0	0	0	0	0	0	0	0	0	0
M04Jan2009	0	0	0	0	0	0	0	0	0	0	0	0	0	0	0	0	0	0	0	0	0	0	0	0	0	0	0	0	0	0	0	0	0	0	0	0	0	0	0	0	0	0	0	0	0	0	0	0	0
M05Jan2009	0	0	0	0	0	0	0	0	0	0	0	0	0	0	0	0	0	0	0	0	0	0	0	0	0	0	0	0	0	0	0	0	0	0	0	0	0	0	0	0	0	0	0	0	0	0	0	0	0
M05Jan2009	0	0	0	0	0	0	0	0	0	0	0	0	0	0	0	0	0	0	0	0	0	0	0	0	0	0	0	0	0	0	0	0	0	0	0	0	0	0	0	0	0	0	0	0	0	0	0	0	0
M05Jan2009	0	0	0	0	0	0	0	0	0	0	0	0	0	0	0	0	0	0	0	0	0	0	0	0	0	0	0	0	0	0	0	0	0	0	0	0	0	0	0	0	0	0	0	0	0	0	0	0	0
M06Jan2009	0	0	0	0	0	0	0	0	0	0	0	0	0	0	0	0	0	0	0	0	0	0	0	0	0	0	0	0	0	0	0	0	0	0	0	0	0	0	0	0	0	0	0	0	0	0	0	0	0
M06Jan2009	0	0	0	0	0	0	0	0	0	0	0	0	0	0	0	0	0	0	0	0	0	0	0	0	0	0	0	0	0	0	0	0	0	0	0	0	0	0	0	0	0	0	0	0	0	0	0	0	0
M06Jan2009	0	0	0	0	0	0	0	0	0	0	1	0	0	0	0	0	0	0	0	0	0	0	0	0	0	0	0	0	0	0	0	0	0	0	0	0	0	0	0	0	0	0	0	0	0	0	0	0	0
M07Jan2009	0	5	0	0	0	0	0	0	0	0	0	0	0	0	0	0	0	0	0	2	0	0	0	0	0	0	0	0	0	0	0	0	0	0	0	0	0	0	2	0	0	0	0	0	0	0	0	0	0
M07Jan2009	0	5	0	0	0	0	0	0	0	1	0	0	0	0	1	0	0	0	0	0	0	0	0	0	0	0	0	0	0	0	0	0	0	0	0	0	0	0	0	0	0	0	0	0	0	0	0	0	0
M07Jan2009	0	0	0	0	0	0	0	0	0	0	0	0	0	0	1	0	0	0	0	1	0	0	0	0	0	0	0	0	0	0	0	0	0	0	0	0	0	0	0	0	0	0	0	0	0	0	0	0	0
M08Jan2009	0	0	0	0	0	0	0	0	0	6	0	0	0	0	0	0	0	0	0	1	0	0	0	0	0	0	0	1	0	11	0	0	0	0	0	0	0	0	0	0	0	1	0	0	0	0	0	0	0
M08Jan2009	0	0	0	0	0	0	0	0	0	16	0	0	0	0	0	0	0	0	0	0	0	0	0	0	0	0	0	2	0	8	0	0	0	0	0	0	0	0	1	0	0	0	0	0	0	0	0	0	0
M08Jan2009	0	0	0	0	0	0	0	0	0	1	0	0	0	0	0	0	0	0	0	0	0	0	0	0	0	0	0	3	0	6	0	0	0	0	0	0	0	0	0	0	0	0	0	0	0	0	0	0	0
M09Jan2009	0	0	0	0	0	0	0	0	0	0	1	0	0	0	0	0	0	0	0	0	0	0	0	0	0	0	0	0	0	1	0	0	0	0	0	0	0	0	0	2	0	0	0	0	0	0	0	0	0
M09Jan2009	0	3	0	0	0	0	0	0	0	0	0	0	0	0	0	0	0	0	0	0	0	0	0	0	0	0	0	0	0	1	0	0	0	0	0	0	0	0	0	0	0	0	0	0	0	0	0	0	0
M09Jan2009	0	0	0	0	0	0	0	0	0	0	1	0	0	0	0	1	0	0	0	0	0	0	0	0	0	0	0	0	0	2	0	0	0	0	0	0	0	0	0	0	0	0	0	0	0	0	0	0	0
M10Jan2009	0	0	0	0	0	0	0	0	0	0	0	0	0	0	0	0	0	0	0	0	0	0	0	0	0	0	0	0	0	0	0	0	0	0	0	0	0	0	0	0	0	0	0	0	0	0	0	0	0
M10Jan2009	0	0	0	0	0	0	0	0	0	0	0	0	0	0	0	0	0	0	0	0	0	0	0	0	0	0	0	0	0	0	0	0	0	0	0	0	0	0	0	0	0	0	0	0	0	0	0	0	0
M10Jan2009	0	0	0	0	0	0	0	0	0	0	0	0	0	0	0	0	0	0	0	0	0	0	0	0	0	0	0	0	0	1	0	0	0	0	0	0	0	0	0	0	0	0	0	0	0	0	0	0	0
M11Jan2009	0	0	0	0	0	0	0	0	0	0	0	0	0	0	0	0	0	0	0	0	0	0	0	0	0	0	0	0	0	1	0	0	0	0	0	0	0	0	0	0	0	0	0	0	0	0	0	0	0
M11Jan2009	0	0	0	0	0	0	0	0	0	0	0	0	0	0	0	0	0	0	0	0	0	0	0	0	0	0	0	0	0	0	0	0	0	0	0	0	0	0	0	0	0	0	0	0	0	0	0	0	0
M11Jan2009	0	0	0	0	0	0	0	0	0	0	0	0	0	0	0	0	0	0	0	0	0	0	0	0	0	0	0	0	0	0	0	0	0	0	0	0	0	0	0	0	0	0	0	0	0	0	0	0	0
M12Jan2009	0	0	0	0	0	0	0	0	0	0	0	0	0	0	0	0	0	0	0	0	0	0	0	0	0	0	0	0	0	44	0	0	0	0	0	0	0	0	0	0	0	0	0	0	0	0	0	0	0
M12Jan2009	0	0	0	0	0	0	0	0	0	0	0	0	0	0	0	0	0	0	0	0	0	0	0	0	0	0	0	0	0	29	0	0	0	0	0	0	0	0	0	0	0	0	0	0	0	0	0	0	0
M12Jan2009	0	0	0	0	0	0	0	0	0	0	0	0	0	0	0	0	0	0	0	0	0	0	0	0	0	0	0	0	0	15	0	0	0	0	0	0	0	0	0	0	0	1	0	0	0	0	0	0	0
M13Jan2009	0	0	0	0	0	0	0	0	0	0	0	0	0	0	0	0	0	0	0	0	0	0	0	0	0	0	0	0	0	0	0	0	0	0	0	0	0	0	0	0	0	0	0	0	0	0	0	0	0
M13Jan2009	0	0	0	0	0	0	0	0	0	0	0	0	0	0	0	0	0	0	0	0	0	0	0	0	0	0	0	0	0	0	0	0	0	0	0	0	0	0	0	0	0	0	0	0	0	0	0	0	0
M13Jan2009	0	0	0	0	0	0	0	0	0	0	0	0	0	0	0	0	0	0	0	0	0	0	0	0	0	0	0	0	0	0	0	0	0	0	0	0	0	0	0	0	0	0	0	0	0	0	0	0	0
M14Jan2009	0	0	0	0	0	0	0	0	0	0	0	0	0	0	0	0	0	0	0	0	0	0	0	0	0	0	0	0	0	0	0	0	0	0	0	0	0	0	0	0	0	0	0	0	0	0	0	0	0
M14Jan2009	0	0	0	0	0	0	0	0	0	0	0	0	0	0	0	0	0	0	0	0	0	1	0	0	0	0	0	0	0	0	0	0	0	0	0	0	0	0	0	0	0	0	0	0	0	0	0	0	0
M14Jan2009	0	0	0	0	0	0	0	0	0	0	0	0	0	0	0	0	0	0	0	0	0	0	0	0	0	0	0	0	0	0	0	0	0	0	0	0	0	0	0	0	0	0	0	0	0	0	0	0	0
M15Jan2009	0	0	0	0	0	0	0	0	0	0	0	0	0	0	0	0	0	0	0	0	0	0	0	0	0	0	0	0	0	0	0	0	0	0	0	0	0	0	0	0	0	0	0	0	0	0	0	0	0
M15Jan2009	0	0	0	0	0	0	0	0	0	0	0	0	0	0	0	0	0	0	0	0	0	0	0	0	0	0	0	0	0	0	0	0	0	0	0	0	0	0	0	0	0	0	0	0	0	0	0	0	0
M15Jan2009	0	0	0	0	0	0	0	0	0	0	0	0	0	0	0	0	0	0	0	0	0	0	0	0	0	0	0	0	0	0	0	0	0	0	0	0	0	0	0	0	0	0	0	0	0	0	0	0	0
M01Apr2009	0	0	0	0	0	0	0	0	0	0	0	0	0	0	0	0	0	0	0	0	0	0	0	0	0	0	0	0	0	0	0	0	0	0	0	0	0	0	0	0	0	0	0	0	0	0	0	0	0
M01Apr2009	0	0	0	0	0	0	0	0	0	0	0	0	0	0	0	0	0	0	0	0	0	0	0	0	0	0	0	0	0	0	0	0	0	0	0	0	0	0	0	0	0	0	0	0	0	0	0	0	0
M01Apr2009	0	0	0	0	0	0	0	0	0	0	0	0	0	0	0	0	0	0	0	0	0	0	0	0	0	0	0	0	0	0	0	0	0	0	0	0	0	0	0	0	0	0	0	0	0	0	0	0	0
M02Apr2009	0	0	0	0	0	0	0	0	0	0	0	0	0	0	0	0	0	0	0	0	0	0	0	0	0	0	0	0	0	0	0	0	0	0	0	0	0	0	0	0	0	0	0	0	0	0	0	0	0
M02Apr2009	0	0	0	0	0	0	0	0	0	0	0	0	0	0	0	0	0	0	0	1	0	0	0	0	0	0	0	0	0	0	0	0	0	0	0	0	0	0	0	0	0	0	0	0	0	0	0	0	0
M02Apr2009	0	0	0	0	0	0	0	0	0	0	0	0	0	0	0	0	0	0	0	0	0	0	0	0	0	0	0	0	0	0	0	0	0	0	0	0	0	0	0	0	0	0	0	0	0	0	0	0	0
M03Apr2009	0	0	0	0	0	0	0	0	0	0	0	0	0	0	0	0	0	0	0	0	0	0	0	0	0	0	0	0	0	0	0	0	0	0	0	0	0	0	0	0	0	0	0	0	0	0	0	0	0
M03Apr2009	0	0	0	0	0	0	0	0	0	0	0	0	0	0	0	0	0	0	0	0	0	0	0	0	0	0	0	0	0	0	0	0	0	0	0	0	0	0	0	0	0	0	0	0	0	0	0	0	0
M03Apr2009	0	0	0	0	0	0	0	0	0	0	0	0	0	0	0	0	0	0	0	0	0	0	0	0	0	0	0	0	0	0	0	0	0	0	0	0	0	0	0	0	0	0	0	0	0	0	0	0	0
M04Apr2009	0	0	0	0	0	0	0	0	0	0	0	0	0	0	0	0	0	0	0	0	0	0	0	0	0	0	0	0	0	0	0	0	0	0	0	0	0	0	0	0	0	0	0	0	0	0	0	0	0
M04Apr2009	0	0	0	0	0	0	0	0	0	0	0	0	0	0	0	0	0	0	0	0	0	0	0	0	0	0	0	0	0	0	0	0	0	0	0	0	0	0	0	0	0	0	0	0	0	0	0	0	0
M04Apr2009	0	0	0	0	0	0	0	0	0	0	0	0	0	0	0	0	0	0	0	0	0	0	0	0	0	0	0	0	0	0	0	0	0	0	0	0	0	0	0	0	0	0	0	0	0	0	0	0	0
M05Apr2009	0	0	0	0	0	0	0	0	0	0	0	0	0	0	0	0	0	0	0	0	0	0	0	0	0	0	0	0	0	0	0	0	0	0	0	0	0	0	0	0	0	0	0	0	0	0	0	0	0
M05Apr2009	0	0	0	0	0	0	0	0	0	0	0	0	0	0	0	0	0	0	0	0	0	0	0	0	0	0	0	0	0	0	0	0	0	0	0	0	0	0	0	0	0	0	0	0	0	0	0	0	0
M05Apr2009	0	0	0	0	0	0	0	0	0	0	0	0	0	0	0	0	0	0	0	0	0	0	0	0	0	0	0	0	0	0	0	0	0	0	0	0	0	0	0	0	0	0	0	0	0	0	0	0	0
M06Apr2009	0	0	0	0	0	0	0	0	0	0	0	0	0	0	0	0	0	0	0	0	0	0	0	0	0	0	0	0	0	0	0	0	0	0	0	0	0	0	0	0	0	0	0	0	0	0	0	0	0
M06Apr2009	0	0	0	0	0	0	0	0	0	0	0	0	0	0	0	0	0	0	0	0	0	0	0	0	0	0	0	0	0	0	0	0	0	0	0	0	0	0	0	0	0	0	0	0	0	0	0	0	0
M06Apr2009	0	0	0	0	0	0	0	0	0	0	0	0	0	0	0	0	0	0	0	0	0	0	0	0	0	0	0	0	0	0	0	0	0	0	0	0	0	0	0	0	0	0	0	0	0	0	0	0	0
M07Apr2009	0	1	0	0	0	0	0	0	0	0	0	0	0	0	0	0	0	0	0	0	0	0	0	0	0	0	0	0	0	6	0	0	0	0	0	0	0	0	2	0	0	0	0	0	0	0	0	0	0
M07Apr2009	0	1	0	0	0	0	0	0	0	0	0	0	0	0	0	0	0	0	0	0	0	0	0	0	0	0	0	0	0	0	0	0	0	0	0	0	0	0	1	0	0	0	0	0	0	0	0	0	0
M07Apr2009	0	0	0	0	0	0	0	0	0	0	0	0	0	0	0	0	0	0	0	0	0	0	0	0	0	0	0	0	0	2	0	0	0	0	0	0	0	0	3	0	0	0	0	0	0	0	0	0	0
M08Apr2009	0	0	0	0	0	0	0	0	0	2	0	0	0	0	0	0	0	0	0	0	0	0	0	0	0	0	0	1	0	7	0	0	0	0	0	0	0	0	2	0	0	1	0	0	0	0	0	0	0
M08Apr2009	0	1	0	0	0	0	0	0	0	0	1	0	0	0	0	0	0	0	0	0	0	0	0	0	0	0	0	1	0	7	0	0	0	0	0	0	0	0	5	0	0	0	0	0	0	0	0	0	0
M08Apr2009	0	0	0	0	0	0	0	0	0	1	0	0	0	0	0	0	0	0	0	0	0	0	0	0	0	0	0	7	0	0	0	0	0	0	0	0	0	0	1	0	0	5	0	0	0	0	0	0	0
M09Apr2009	0	0	0	0	0	0	0	0	0	0	0	0	0	0	0	0	0	0	0	0	0	0	0	0	0	0	0	0	0	0	0	0	0	0	0	0	0	0	2	0	0	1	0	0	0	0	0	0	0
M09Apr2009	0	1	0	0	0	0	0	0	0	0	0	0	0	0	0	0	0	0	0	0	0	0	0	0	0	0	0	0	0	0	0	0	0	0	0	0	0	0	1	0	0	0	0	0	0	0	0	0	0
M09Apr2009	0	0	0	0	0	0	0	0	0	0	1	0	0	0	0	0	0	0	0	0	0	0	0	0	0	0	0	0	0	0	0	0	0	0	0	0	0	0	1	0	0	2	0	0	0	0	0	0	0
M10Apr2009	0	0	0	0	0	0	0	0	0	0	0	0	0	0	0	0	0	0	0	0	0	0	0	0	0	0	0	0	0	0	0	0	0	0	0	0	0	0	0	0	0	1	0	0	0	0	0	0	0
M10Apr2009	0	0	0	0	0	0	0	0	0	0	1	0	0	0	0	0	0	0	0	0	0	0	0	0	0	0	0	0	0	0	0	0	0	0	0	0	0	0	0	0	0	0	0	0	0	0	0	0	0
M10Apr2009	0	0	0	0	0	0	0	0	0	0	0	0	0	0	0	0	0	0	0	0	0	0	0	0	0	0	0	0	0	0	0	0	0	0	0	0	0	0	0	0	0	0	0	0	0	0	0	0	0
M11Apr2009	0	0	0	0	0	0	0	0	0	0	0	0	0	0	0	0	0	0	0	0	0	0	0	0	0	0	0	0	0	0	0	0	0	0	0	0	0	0	1	0	0	0	0	0	0	0	0	0	0
M11Apr2009	0	0	0	0	0	0	0	0	0	0	0	0	0	0	0	0	0	0	0	0	0	0	0	0	0	0	0	0	0	0	0	0	0	0	0	0	0	0	2	0	0	0	0	0	0	0	0	0	0
M11Apr2009	0	0	0	0	0	0	0	0	0	0	0	0	0	0	0	0	0	0	0	0	0	0	0	0	0	0	0	0	0	2	0	0	0	0	0	0	0	0	0	0	0	0	0	0	0	0	0	0	0
M12Apr2009	0	2	0	0	0	0	0	0	0	0	1	0	0	0	0	0	0	0	0	1	0	0	0	0	0	0	0	34	0	0	0	0	0	0	0	0	0	0	0	0	0	2	0	0	0	0	0	0	0
M12Apr2009	0	0	0	0	0	0	0	0	0	0	0	0	0	0	0	0	0	0	0	0	0	0	0	0	0	0	0	0	0	6	0	0	0	0	0	0	0	0	0	0	0	0	0	0	0	0	0	0	0
M12Apr2009	0	15	0	0	0	0	0	0	0	0	1	0	0	0	0	0	0	0	0	0	0	0	0	0	0	0	0	0	0	13	0	0	0	0	0	0	0	0	0	0	0	0	0	0	0	0	0	0	0
M13Apr2009	0	2	0	0	0	0	0	0	0	0	0	0	0	0	0	0	0	0	0	0	0	0	0	0	0	0	0	0	0	0	0	0	0	0	0	0	0	0	0	0	0	0	0	0	0	0	0	0	0
M13Apr2009	0	0	0	0	0	0	0	0	0	0	0	0	0	0	0	0	0	0	0	0	0	0	0	0	0	0	0	0	0	0	0	0	0	0	0	0	0	0	0	0	0	0	0	0	0	0	0	0	0
M13Apr2009	0	1	0	0	0	0	0	0	0	0	0	0	0	0	0	0	0	0	0	2	0	0	0	0	0	0	0	0	0	0	0	0	0	0	0	0	0	0	0	0	0	0	0	0	0	0	0	0	0
M14Apr2009	0	0	0	0	0	0	0	0	0	0	0	0	0	0	0	0	0	0	0	0	0	0	0	0	0	0	0	0	0	0	0	0	0	0	0	0	0	0	0	0	0	0	0	0	0	0	0	0	0
M14Apr2009	0	0	0	0	0	0	0	0	0	0	0	0	0	0	0	0	0	0	0	0	0	0	0	0	0	0	0	0	0	0	0	0	0	0	0	0	0	0	0	0	0	0	0	0	0	0	0	0	0
M14Apr2009	0	0	0	0	0	0	0	0	0	0	0	0	0	0	0	0	0	0	0	1	0	0	0	0	0	0	0	0	0	0	0	0	0	0	0	0	0	0	0	0	0	0	0	0	0	0	0	0	0
M01Jul2009	0	0	0	0	0	0	0	0	0	0	0	0	0	0	0	0	0	0	0	0	0	0	0	0	0	0	0	0	0	0	0	0	0	0	0	0	0	0	0	0	0	0	0	0	0	0	0	0	0
M01Jul2009	0	0	0	0	0	0	0	0	0	0	0	0	0	0	0	0	0	0	0	0	0	0	0	0	0	0	0	0	0	0	0	0	0	0	0	0	0	0	0	0	0	0	0	0	0	0	0	0	0
M01Jul2009	0	0	0	0	0	0	0	0	0	0	0	0	0	0	0	0	0	0	0	0	0	0	0	0	0	0	0	0	0	0	0	0	0	0	0	0	0	0	0	0	0	0	0	0	0	0	0	0	0
M02Jul2009	0	0	0	0	0	0	0	0	0	0	0	0	0	0	0	0	0	0	0	0	0	0	0	0	0	0	0	0	0	0	0	0	0	0	0	0	0	0	0	0	0	0	0	0	0	0	0	0	0
M02Jul2009	0	0	0	0	0	0	0	0	0	0	0	0	0	0	0	0	0	0	0	0	0	0	0	0	0	0	0	0	0	0	0	0	0	0	0	0	0	0	0	0	0	0	0	0	0	0	0	0	0
M02Jul2009	0	0	0	0	0	0	0	0	0	0	0	0	0	0	0	0	0	0	0	0	0	0	0	0	0	0	0	0	0	0	0	0	0	0	0	0	0	0	0	0	0	0	0	0	0	0	0	0	0
M03Jul2009	0	0	0	0	0	0	0	0	0	0	0	0	0	0	0	0	0	0	0	0	0	0	0	0	0	0	0	0	0	0	0	0	0	0	0	0	0	0	0	0	0	0	0	0	0	0	0	0	0
M03Jul2009	0	0	0	0	0	0	0	0	0	0	0	0	0	0	0	0	0	0	0	0	0	0	0	0	0	0	0	0	0	0	0	0	0	0	0	0	0	0	0	0	0	0	0	0	0	0	0	0	0
M03Jul2009	0	0	0	0	0	0	0	0	0	0	0	0	0	0	0	0	0	0	0	0	0	0	0	0	0	0	0	0	0	0	0	0	0	0	0	0	0	0	0	0	0	0	0	0	0	0	0	0	0
M04Jul2009	0	0	0	0	0	0	0	0	0	0	0	0	0	0	0	0	0	0	0	0	0	0	0	0	0	0	0	0	0	0	0	0	0	0	0	0	0	0	0	0	0	0	0	0	0	0	0	0	0
M04Jul2009	0	0	0	0	0	0	0	0	0	0	0	0	0	0	0	0	0	0	0	0	0	0	0	0	0	0	0	0	0	0	0	0	0	0	0	0	0	0	0	0	0	0	0	0	0	0	0	0	0
M04Jul2009	0	0	0	0	0	0	0	0	0	0	0	0	0	0	0	0	0	0	0	0	0	0	0	0	0	0	0	0	0	0	0	0	0	0	0	0	0	0	0	0	0	0	0	0	0	0	0	0	0
M05Jul2009	0	0	0	0	0	0	0	0	0	0	0	0	0	0	0	0	0	0	0	0	0	0	0	0	0	0	0	0	0	0	0	0	0	0	0	0	0	0	0	0	0	0	0	0	0	0	0	0	0
M05Jul2009	0	0	0	0	0	0	0	0	0	0	0	0	0	0	0	0	0	0	0	0	0	0	0	0	0	0	0	0	0	0	0	0	0	0	0	0	0	0	0	0	0	0	0	0	0	0	0	0	0
M05Jul2009	0	0	0	0	0	0	0	0	0	0	0	0	0	0	0	0	0	0	0	0	0	0	0	0	0	0	0	0	0	0	0	0	0	0	0	0	0	0	0	0	0	0	0	0	0	0	0	0	0
M06Jul2009	0	0	0	0	0	0	0	0	0	0	0	0	0	0	0	0	0	0	0	0	0	0	0	0	0	0	0	0	0	0	0	0	0	0	0	0	0	0	0	0	0	0	0	0	0	0	0	0	0
M06Jul2009	0	0	0	0	0	0	0	0	0	0	0	0	0	0	0	0	0	0	0	0	0	0	0	0	0	0	0	0	0	0	0	0	0	0	0	0	0	0	0	0	0	0	0	0	0	0	0	0	0
M06Jul2009	0	0	0	0	0	0	0	0	0	0	0	0	0	0	0	0	0	0	0	0	0	0	0	0	0	0	0	0	0	0	0	0	0	0	0	0	0	0	0	0	0	0	0	0	0	0	0	0	0
M07Jul2009	0	0	0	0	0	0	0	0	0	0	0	0	0	0	0	0	0	0	0	0	0	0	0	0	0	0	0	0	0	0	0	0	0	0	0	0	0	0	0	0	0	0	0	0	0	0	0	0	0
M07Jul2009	0	0	0	0	0	0	0	0	0	0	0	0	0	0	0	3	0	0	0	0	0	0	0	0	0	0	0	0	0	0	0	0	0	0	0	0	0	0	2	0	0	0	0	0	0	0	0	0	0
M07Jul2009	0	0	0	0	0	0	0	0	0	0	0	0	0	0	0	0	0	0	0	0	0	0	0	0	0	0	0	0	0	0	0	0	0	0	0	0	0	0	0	0	0	0	0	0	0	0	0	0	0
M08Jul2009	0	0	0	0	0	0	0	0	19	0	0	0	0	0	0	0	0	0	0	0	0	0	0	0	0	0	0	0	0	4	0	0	0	0	0	0	0	0	0	0	0	0	0	0	0	0	0	0	0
M08Jul2009	0	0	0	0	0	0	0	0	8	0	1	0	0	0	0	0	0	0	0	0	0	0	0	0	0	0	0	0	0	10	0	0	0	0	0	0	0	0	0	0	0	0	0	0	0	0	0	0	0
M08Jul2009	0	0	0	0	0	0	0	0	1	0	0	0	0	0	0	0	0	0	0	0	0	0	0	0	0	0	0	0	0	7	0	0	0	0	0	0	0	0	0	0	0	0	0	0	0	0	0	0	0
M09Jul2009	0	0	0	0	0	0	0	1	0	0	0	0	0	0	0	0	0	0	0	0	0	0	0	0	0	0	0	0	0	0	0	0	0	0	0	0	0	0	0	0	0	0	0	0	0	0	0	0	0
M09Jul2009	0	0	0	0	0	0	0	2	0	0	0	0	0	0	0	0	0	0	0	0	0	0	0	0	0	0	0	0	0	0	0	0	0	0	0	0	0	0	0	0	0	0	0	0	0	0	0	0	0
M09Jul2009	0	0	0	0	0	0	0	0	0	0	0	0	0	0	0	0	0	0	0	0	0	0	0	0	0	0	0	0	0	1	0	0	0	0	0	0	0	0	1	0	0	1	0	0	0	0	0	0	0
M11Jul2009	0	0	0	0	0	0	0	0	0	0	5	0	0	0	0	0	0	0	0	0	0	0	0	0	0	0	0	0	0	0	0	0	0	0	0	0	0	0	0	0	0	0	0	0	0	0	0	0	0
M11Jul2009	0	0	0	0	0	0	0	0	0	0	1	0	0	0	0	0	0	0	0	0	0	0	0	0	0	0	0	0	0	0	0	0	0	0	0	0	0	0	0	0	0	0	0	0	0	0	0	0	0
M11Jul2009	0	0	0	0	0	0	0	0	0	0	1	0	0	0	0	0	0	0	0	0	0	0	0	0	0	0	0	0	0	0	0	0	0	0	0	0	0	0	0	0	0	0	0	0	0	0	0	0	0
M12Jul2009	0	1	0	0	0	0	0	0	0	0	2	0	0	0	0	0	0	0	0	0	0	0	0	0	0	0	0	0	0	25	0	0	0	0	0	0	0	0	0	0	0	0	0	0	0	0	0	0	0
M12Jul2009	0	0	0	0	0	0	0	0	0	0	0	0	0	0	0	0	0	0	0	0	0	0	0	0	0	0	0	0	0	14	0	0	0	0	0	0	0	0	0	0	0	0	0	0	0	0	0	0	0
M12Jul2009	0	0	0	0	0	0	0	0	0	0	0	0	0	0	0	0	0	0	0	0	0	0	0	0	0	0	0	0	0	33	0	0	0	0	0	0	0	0	0	0	0	0	0	0	0	0	0	0	0
M13Jul2009	0	6	0	0	0	0	0	0	0	0	0	0	0	0	0	0	0	0	0	0	0	0	0	0	0	0	0	0	0	2	0	0	0	0	0	0	0	0	0	0	0	0	0	0	0	0	0	0	0
M13Jul2009	0	0	0	0	0	0	0	0	0	0	0	0	0	0	0	0	0	0	0	0	0	0	0	0	0	0	0	0	0	0	0	0	0	0	0	0	0	0	0	0	0	0	0	0	0	0	0	0	0
M13Jul2009	0	1	0	0	0	0	0	0	0	0	0	0	0	0	0	0	0	0	0	0	0	0	0	0	0	0	0	0	0	0	0	0	0	0	0	0	0	0	0	0	0	0	0	0	0	0	0	0	0
M14Jul2009	0	0	0	0	0	0	0	0	0	0	0	0	0	0	0	0	0	0	0	0	0	0	0	0	0	0	0	0	0	0	0	0	0	0	0	0	0	0	0	0	0	0	0	0	0	0	0	0	0
M14Jul2009	0	0	0	0	0	0	0	0	0	0	0	0	0	0	0	0	0	0	0	0	0	0	0	0	0	0	0	0	0	0	0	0	0	0	0	0	0	0	0	0	0	0	0	0	0	0	0	0	0
M14Jul2009	0	0	0	0	0	0	0	0	0	0	0	0	0	0	0	0	0	0	0	0	0	0	0	0	0	0	0	0	0	0	0	0	0	0	0	0	0	0	0	0	0	0	0	0	0	0	0	0	0
M15Jul2009	0	0	0	0	0	0	0	0	0	0	0	0	0	0	0	0	0	0	0	0	0	0	0	0	0	0	0	0	0	0	0	0	0	0	0	0	0	0	0	0	0	0	0	0	0	0	0	0	0
M15Jul2009	0	0	0	0	0	0	0	0	0	0	0	0	0	0	0	0	0	0	0	0	0	0	0	0	0	0	0	0	0	0	0	0	0	0	0	0	0	0	0	0	0	0	0	0	0	0	0	0	0
M15Jul2009	0	0	0	0	0	0	0	0	0	0	0	0	0	0	0	0	0	0	0	0	0	0	0	0	0	0	0	0	0	0	0	0	0	0	0	0	0	0	0	0	0	0	0	0	0	0	0	0	0
M02Sept2009	0	0	0	0	0	0	0	0	0	0	0	0	0	0	0	0	0	0	0	0	0	0	0	0	0	0	0	0	0	0	0	0	0	0	0	0	0	0	0	0	0	0	0	0	0	0	0	0	0
M02Sept2009	0	0	0	0	0	0	0	0	0	0	0	0	0	0	0	0	0	0	0	0	0	0	0	0	0	0	0	0	0	0	0	0	0	0	0	0	0	0	0	0	0	0	0	0	0	0	0	0	0
M02Sept2009	0	0	0	0	0	0	0	0	0	0	0	0	0	0	0	0	0	0	0	0	0	0	0	0	0	0	0	0	0	0	0	0	0	0	0	0	0	0	0	0	0	0	0	0	0	0	0	0	0
M03Sept2009	0	0	0	0	0	0	0	0	0	0	0	0	0	0	0	0	0	0	0	0	0	0	0	0	0	0	0	0	0	0	0	0	0	0	0	0	0	0	0	0	0	0	0	0	0	0	0	0	0
M03Sept2009	0	0	0	0	0	0	0	0	0	0	0	0	0	0	0	0	0	0	0	0	0	0	0	0	0	0	0	0	0	0	0	0	0	0	0	0	0	0	0	0	0	0	0	0	0	0	0	0	0
M03Sept2009	0	0	0	0	0	0	0	0	0	0	0	0	0	0	0	0	0	0	0	0	0	0	0	0	0	0	0	0	0	0	0	0	0	0	0	0	0	0	0	0	0	0	0	0	0	0	0	0	0
M05Sept2009	0	0	0	0	0	0	0	0	0	0	0	0	0	0	0	0	0	0	0	0	0	0	0	0	0	0	0	0	0	0	0	0	0	0	0	0	0	0	0	0	0	0	0	0	0	0	0	0	0
M05Sept2009	0	0	0	0	0	0	0	0	0	0	0	0	0	0	0	0	0	0	0	0	0	0	0	0	0	0	0	0	0	0	0	0	0	0	0	0	0	0	0	0	0	0	0	0	0	0	0	0	0
M05Sept2009	0	0	0	0	0	0	0	0	0	0	0	0	0	0	0	0	0	0	0	0	0	0	0	0	0	0	0	0	0	0	0	0	0	0	0	0	0	0	0	0	0	0	0	0	0	0	0	0	0
M06Sept2009	0	0	0	0	0	0	0	0	0	0	0	0	0	0	0	0	0	0	0	0	0	0	0	0	0	0	0	0	0	0	0	0	0	0	0	0	0	0	0	0	0	0	0	0	0	0	0	0	0
M06Sept2009	0	0	0	0	0	0	0	0	0	0	0	0	0	0	0	0	0	0	0	1	0	0	0	0	0	0	0	0	0	0	0	0	0	0	0	0	0	0	0	0	0	0	0	0	0	0	0	0	0
M06Sept2009	0	0	0	0	0	0	0	0	0	0	0	0	0	0	0	0	0	0	0	0	0	0	0	0	0	0	0	0	0	0	0	0	0	0	0	0	0	0	0	0	0	0	0	0	0	0	0	0	0
M07Sept2009	0	0	0	0	0	0	0	0	0	0	0	0	0	0	0	0	0	0	0	2	0	0	0	0	0	0	0	0	0	1	0	0	0	0	0	0	0	0	0	5	0	0	0	0	0	0	0	0	0
M07Sept2009	0	0	0	0	0	0	0	0	0	0	0	0	0	0	0	3	0	0	0	2	0	0	0	0	0	0	0	0	0	0	0	0	0	0	0	0	0	0	0	0	0	1	0	0	0	0	0	0	0
M07Sept2009	0	0	0	0	0	0	0	0	0	0	0	0	0	0	0	0	0	0	0	1	0	0	0	0	0	0	0	0	0	0	0	0	0	0	0	0	0	0	0	3	0	0	0	0	0	0	0	0	0
M08Sept2009	0	0	0	0	0	0	4	0	0	0	3	0	0	0	0	0	0	0	0	0	0	0	0	0	0	0	0	0	0	2	0	0	0	0	0	0	0	0	0	0	0	0	0	0	0	0	0	0	0
M08Sept2009	0	0	0	0	0	0	2	0	0	0	4	0	0	0	0	0	0	0	0	0	0	0	0	0	0	0	0	1	0	1	0	0	0	0	0	0	0	0	0	0	0	0	0	0	0	0	0	0	0
M08Sept2009	0	0	0	0	0	0	4	0	0	0	4	0	0	0	0	0	0	0	0	0	0	0	0	0	0	0	0	0	0	6	0	0	0	0	0	0	0	0	0	0	0	0	0	0	0	0	0	0	0
M09Sept2009	0	0	0	0	0	0	0	0	0	1	0	0	0	0	0	0	0	0	0	0	0	0	0	0	0	0	0	0	0	0	1	0	0	0	0	0	0	0	0	0	0	1	0	0	0	0	0	0	0
M09Sept2009	0	0	0	0	0	0	0	0	0	0	0	0	0	0	0	0	0	0	0	0	0	0	0	0	0	0	0	0	0	0	2	0	0	0	0	0	0	0	0	0	0	3	0	0	0	0	0	0	0
M09Sept2009	0	0	0	0	0	0	0	0	0	0	0	0	0	0	0	0	0	0	0	0	0	0	0	0	0	0	0	0	0	0	1	0	0	0	0	0	0	0	0	0	0	1	0	0	0	0	0	0	0
M11Oct2009	0	0	0	0	0	0	0	0	0	0	1	0	0	0	0	0	0	0	0	0	0	0	0	0	0	0	0	0	0	0	0	0	0	0	0	0	0	0	0	0	0	0	0	0	0	0	0	0	0
M11Oct2009	0	0	0	0	0	0	0	0	0	0	1	0	0	0	0	0	0	0	0	0	0	0	0	0	0	0	0	0	0	0	0	0	0	0	0	0	0	0	1	0	0	0	0	0	0	0	0	0	0
M11Oct2009	0	0	0	0	0	0	0	0	0	0	0	0	0	0	0	0	0	0	0	0	0	0	0	0	0	0	0	0	0	0	0	0	0	0	0	0	0	0	0	0	0	0	0	0	0	0	0	0	0
M14Sept2009	0	0	0	0	0	0	0	0	0	0	0	0	0	0	0	0	0	0	0	0	0	0	0	0	0	0	0	0	0	0	0	0	0	0	0	0	0	0	0	0	0	0	0	0	0	0	0	0	0
M14Sept2009	0	0	0	0	0	0	0	0	0	0	0	0	0	0	0	0	0	0	0	0	0	0	0	0	0	0	0	0	0	0	0	0	0	0	0	0	0	0	0	0	0	0	0	0	0	0	0	0	0
M14Sept2009	0	0	0	0	0	0	0	0	0	0	0	0	0	0	0	0	0	0	0	0	0	0	0	0	0	0	0	0	0	0	0	0	0	0	0	0	0	0	0	0	0	0	0	0	0	0	0	0	0
M01Jan2010	0	0	0	0	0	0	0	0	0	0	0	0	0	0	0	0	0	0	0	0	0	0	0	0	0	0	0	0	0	0	0	0	0	0	0	0	0	0	0	0	0	0	0	0	0	0	0	0	0
M01Jan2010	0	0	0	0	0	0	0	0	0	0	0	0	0	0	0	0	0	0	0	0	0	0	0	0	0	0	0	0	0	0	0	0	0	0	0	0	0	0	0	0	0	0	0	0	0	0	0	0	0
M01Jan2010	0	0	0	0	0	0	0	0	0	0	0	0	0	0	0	0	0	0	0	0	0	0	0	0	0	0	0	0	0	0	0	0	0	0	0	0	0	0	0	0	0	0	0	0	0	0	0	0	0
M02Jan2010	0	0	0	0	0	0	0	0	0	0	0	0	0	0	0	0	0	0	0	0	0	0	0	0	0	0	0	0	0	0	0	0	0	0	0	0	0	0	0	0	0	0	0	0	0	0	0	0	0
M02Jan2010	0	0	0	0	0	0	0	0	0	0	0	0	0	0	0	0	0	0	0	0	0	0	0	0	0	0	0	0	0	0	0	0	0	0	0	0	0	0	0	0	0	0	0	0	0	0	0	0	0
M02Jan2010	0	0	0	0	0	0	0	0	0	0	0	0	0	0	0	0	0	0	0	0	0	0	0	0	0	0	0	0	0	0	0	0	0	0	0	0	0	0	0	0	0	0	0	0	0	0	0	0	0
M03Jan2010	0	0	0	0	0	0	0	0	0	0	0	0	0	0	0	0	0	0	0	0	0	0	0	0	0	0	0	0	0	0	0	0	0	0	0	0	0	0	0	0	0	0	0	0	0	0	0	0	0
M03Jan2010	0	0	0	0	0	0	0	0	0	0	0	0	0	0	0	0	0	0	0	0	0	0	0	0	0	0	0	0	0	0	0	0	0	0	0	0	0	0	0	0	0	0	0	0	0	0	0	0	0
M03Jan2010	0	0	0	0	0	0	0	0	0	0	0	0	0	0	0	0	0	0	0	0	0	0	0	0	0	0	0	0	0	0	0	0	0	0	0	0	0	0	0	0	0	0	0	0	0	0	0	0	0
M05Jan2010	0	0	0	0	0	0	0	0	0	0	0	0	0	0	0	0	0	0	0	0	0	0	0	0	0	0	0	0	0	0	0	0	0	0	0	0	0	0	0	0	0	0	0	0	0	0	0	0	0
M05Jan2010	0	0	0	0	0	0	0	0	0	0	0	0	0	0	0	0	0	0	0	0	0	0	0	0	0	0	0	0	0	0	0	0	0	0	0	0	0	0	0	0	0	0	0	0	0	0	0	0	0
M05Jan2010	0	0	0	0	0	0	0	0	0	0	0	0	0	0	0	0	0	0	0	0	0	0	0	0	0	0	0	0	0	0	0	0	0	0	0	0	0	0	0	0	0	0	0	0	0	0	0	0	0
M06Jan2010	0	1	0	0	0	0	0	0	0	0	2	0	0	0	0	1	0	0	0	0	0	0	0	0	0	0	0	0	0	1	0	0	0	0	0	0	0	0	1	0	0	0	0	0	0	0	0	0	0
M06Jan2010	0	0	0	0	0	0	0	0	0	0	5	0	0	0	0	0	0	0	0	0	0	0	0	0	0	0	0	0	0	4	0	0	0	0	0	0	0	0	1	0	0	0	0	0	0	0	0	0	0
M06Jan2010	0	0	0	0	0	0	5	0	0	0	7	0	0	0	0	0	0	0	0	0	0	0	0	0	0	0	0	0	0	3	0	0	0	0	0	0	0	0	1	0	0	0	0	0	0	0	0	0	0
M07Jan2010	0	0	0	0	0	0	1	0	0	0	0	0	0	0	0	0	0	0	0	0	0	0	0	0	0	0	0	0	0	3	0	0	0	0	0	0	0	0	0	0	0	0	0	0	0	0	0	0	0
M07Jan2010	0	0	0	0	0	0	0	0	0	0	0	0	0	0	0	0	0	0	0	0	0	0	0	0	0	0	0	0	0	5	0	0	0	0	0	0	0	0	1	0	0	0	0	0	0	0	0	0	0
M07Jan2010	1	0	0	0	0	0	3	0	0	0	0	0	0	0	0	0	0	0	0	0	0	0	0	0	0	0	0	0	0	9	0	0	0	0	0	0	0	0	2	0	0	0	0	0	0	0	0	0	0
M08Jan2010	0	0	0	0	0	0	16	0	0	0	5	0	0	0	0	0	0	0	0	2	0	0	0	0	0	0	0	0	0	0	0	0	0	0	0	0	0	0	0	0	0	0	0	0	0	0	0	0	0
M08Jan2010	0	1	0	0	0	0	10	0	0	0	4	0	0	0	0	0	0	0	0	0	0	0	0	0	0	0	0	0	0	0	0	0	0	0	0	0	0	0	3	0	0	0	0	0	0	0	0	0	0
M08Jan2010	0	0	0	0	0	0	5	0	0	0	2	0	0	0	0	0	0	0	0	1	0	0	0	0	0	0	0	0	0	0	0	0	0	0	0	0	0	0	1	0	0	0	0	0	0	0	0	0	0
M09Jan2010	0	0	0	0	0	0	1	0	0	0	0	0	0	0	0	0	0	0	0	0	0	0	0	0	0	0	0	0	0	0	0	0	0	0	0	0	0	0	0	0	0	0	0	0	0	0	0	0	0
M09Jan2010	0	1	0	0	0	0	1	0	0	0	5	0	0	0	0	0	0	0	0	0	0	0	0	0	0	0	0	0	0	1	0	0	0	0	0	0	0	0	0	0	0	0	0	0	0	0	0	0	0
M09Jan2010	0	0	0	0	0	0	1	0	0	0	1	0	0	0	0	0	0	0	0	0	0	0	0	0	0	0	0	0	0	0	0	0	0	0	0	0	0	0	0	0	0	0	0	0	0	0	0	0	0
M12Jan2010	0	0	0	0	0	0	0	0	0	0	0	0	0	0	0	0	0	0	0	0	0	0	0	0	0	0	0	0	0	22	0	0	0	0	0	0	0	0	0	0	0	0	0	0	0	0	0	0	0
M12Jan2010	0	0	0	0	0	0	0	0	0	0	0	0	0	0	0	0	0	0	0	0	0	0	0	0	0	0	0	0	0	11	0	0	0	0	0	0	0	0	0	0	0	0	0	0	0	0	0	0	0
M12Jan2010	0	0	0	0	0	0	0	0	0	0	0	0	0	0	0	0	0	0	0	0	0	0	0	0	0	0	0	0	0	23	0	0	0	0	0	0	0	0	0	0	0	0	0	0	0	0	0	0	0
M13Jan2010	0	0	0	0	0	0	0	0	0	0	0	0	0	0	0	0	0	0	0	0	0	0	0	0	0	0	0	0	0	0	0	0	0	0	0	0	0	0	0	0	0	0	0	0	0	0	0	0	0
M13Jan2010	0	0	0	0	0	0	0	0	0	0	0	0	0	0	0	0	0	0	0	0	0	0	0	0	0	0	0	0	0	0	0	0	0	0	0	0	0	0	1	0	0	0	0	0	0	0	0	0	0
M13Jan2010	0	1	0	0	0	0	1	0	0	0	0	0	0	0	0	2	0	0	0	0	0	0	0	0	0	0	0	0	0	0	0	0	0	0	0	0	0	0	1	0	0	0	0	0	0	0	0	0	0
M14Jan2010	0	0	0	0	0	0	0	0	0	0	0	0	0	0	0	0	0	0	0	0	0	0	0	0	0	0	0	0	0	0	0	0	0	0	0	0	0	0	0	0	0	0	0	0	0	0	0	0	0
M14Jan2010	0	0	0	0	0	0	0	0	0	0	0	0	0	0	0	0	0	0	0	0	0	0	0	0	0	0	0	0	0	0	0	0	0	0	0	0	0	0	0	0	0	0	0	0	0	0	0	0	0
M14Jan2010	0	0	0	0	0	0	0	0	0	0	0	0	0	0	0	0	0	0	0	0	0	0	0	0	0	0	0	0	0	0	0	0	0	0	0	0	0	0	0	0	0	0	0	0	0	0	0	0	0
M01Apr2010	0	0	0	0	0	0	0	0	0	0	0	0	0	0	0	0	0	0	0	0	0	0	0	0	0	0	0	0	0	0	0	0	0	0	0	0	0	0	0	0	0	0	0	0	0	0	0	0	0
M01Apr2010	0	0	0	0	0	0	0	0	0	0	0	0	0	0	0	0	0	0	0	0	0	0	0	0	0	0	0	0	0	0	0	0	0	0	0	0	0	0	0	0	0	0	0	0	0	0	0	0	0
M01Apr2010	0	0	0	0	0	0	0	0	0	0	0	0	0	0	0	0	0	0	0	0	0	0	0	0	0	0	0	0	0	0	0	0	0	0	0	0	0	0	0	0	0	0	0	0	0	0	0	0	0
M02Apr2010	0	0	0	0	0	0	0	0	0	0	0	0	0	0	0	0	0	0	0	0	0	0	0	0	0	0	0	0	0	0	0	0	0	0	0	0	0	0	0	0	0	0	0	0	0	0	0	0	0
M02Apr2010	0	0	0	0	0	0	0	0	0	0	0	0	0	0	0	0	0	0	0	0	0	0	0	0	0	0	0	0	0	0	0	0	0	0	0	0	0	0	0	0	0	0	0	0	0	0	0	0	0
M02Apr2010	0	0	0	0	0	0	0	0	0	0	0	0	0	0	0	0	0	0	0	0	0	1	0	0	0	0	0	0	0	0	0	0	0	0	0	0	0	0	0	0	0	0	0	0	0	1	0	0	0
M03Apr2010	0	0	0	0	0	0	0	0	0	0	0	0	0	0	0	0	0	0	0	0	0	0	0	0	0	0	0	0	0	0	0	0	0	0	0	0	0	0	0	0	0	0	0	0	0	0	0	0	0
M03Apr2010	0	0	0	0	0	0	0	0	0	0	0	0	0	0	0	0	0	0	0	0	0	0	0	0	0	0	0	0	0	0	0	0	0	0	0	0	0	0	0	0	0	0	0	0	0	0	0	0	0
M03Apr2010	0	0	0	0	0	0	0	0	0	0	0	0	0	0	0	0	0	0	0	0	0	0	0	0	0	0	0	0	0	0	0	0	0	0	0	0	0	0	0	0	0	0	0	0	0	0	0	0	0
M04Apr2010	0	0	0	0	0	0	0	0	0	0	0	0	0	0	0	0	0	0	0	0	0	0	0	0	0	0	0	0	0	0	0	0	0	0	0	0	0	0	0	0	0	0	0	0	0	0	0	0	0
M04Apr2010	0	0	0	0	0	0	0	0	0	0	0	0	0	0	0	0	0	0	0	0	0	0	0	0	0	0	0	0	0	0	0	0	0	0	0	0	0	0	0	0	0	0	0	0	0	0	0	0	0
M04Apr2010	0	0	0	0	0	0	0	0	0	0	0	0	0	0	0	0	0	0	0	0	0	0	0	0	0	0	0	0	0	0	0	0	0	0	0	0	0	0	0	0	0	0	0	0	0	0	0	0	0
M05Apr2010	0	0	0	0	0	0	0	0	0	0	0	0	0	0	0	0	0	0	0	0	0	0	0	0	0	0	0	0	0	0	0	0	0	0	0	0	0	0	0	0	0	0	0	0	0	0	0	0	0
M05Apr2010	0	0	0	0	0	0	0	0	0	0	0	0	0	0	0	0	0	0	0	0	0	0	0	0	0	0	0	0	0	0	0	0	0	0	0	0	0	0	0	0	0	0	0	0	0	0	0	0	0
M05Apr2010	0	0	0	0	0	0	0	0	0	0	0	0	0	0	0	0	0	0	0	0	0	0	0	0	0	0	0	0	0	0	0	0	0	0	0	0	0	0	0	0	0	0	0	0	0	0	0	0	0
M06Apr2010	0	0	0	0	0	0	0	0	0	0	0	0	0	0	0	0	0	0	0	0	0	0	0	0	0	0	0	0	0	0	0	0	0	0	0	0	0	0	0	0	0	0	0	0	0	0	0	0	0
M06Apr2010	0	0	0	0	0	0	0	0	0	0	0	0	0	0	0	0	0	0	0	0	0	0	0	0	0	0	0	0	0	1	0	0	0	0	0	0	0	0	0	0	0	0	0	0	0	0	0	0	0
M06Apr2010	0	0	0	0	0	0	1	0	0	0	0	0	0	0	0	0	0	0	0	0	0	0	0	0	0	0	0	0	0	0	0	0	0	0	0	0	0	0	0	0	0	0	0	0	0	0	0	0	0
M07Apr2010	0	1	0	0	0	0	0	0	0	0	0	0	0	0	0	0	0	0	0	0	0	0	0	0	0	0	0	0	0	5	0	0	0	0	0	0	0	0	2	0	0	0	0	0	0	0	0	0	0
M07Apr2010	0	1	0	0	0	0	1	0	0	0	0	0	0	0	0	0	0	0	0	2	0	0	0	0	0	0	0	0	0	7	0	0	0	0	0	0	0	0	0	0	0	0	0	0	0	0	0	0	0
M07Apr2010	0	0	0	0	0	0	1	0	0	0	1	0	0	0	0	0	0	0	0	1	0	0	0	0	0	0	0	0	0	4	0	0	0	0	0	0	0	0	1	0	0	0	0	0	0	0	0	0	0
M08Apr2010	0	0	0	0	0	0	3	0	0	0	1	0	0	0	0	0	0	0	0	0	0	0	0	0	0	0	0	0	1	0	0	0	0	0	0	0	0	0	1	0	0	0	0	0	0	0	0	0	0
M08Apr2010	0	0	0	0	0	0	1	0	0	0	4	0	0	0	0	0	0	0	0	0	0	0	0	0	0	0	0	0	1	3	0	0	0	0	0	0	0	0	3	0	0	0	0	0	0	0	0	0	0
M08Apr2010	0	0	0	0	0	0	8	0	0	0	3	0	0	0	0	0	0	0	0	0	0	0	0	0	0	0	0	0	0	1	0	0	0	0	0	0	0	0	2	0	0	0	0	0	0	0	0	0	0
M09Apr2010	0	0	0	0	0	0	0	0	0	0	0	0	0	0	0	0	0	0	0	0	0	0	0	0	0	0	0	0	0	0	0	0	0	0	0	0	0	0	0	0	0	0	0	0	0	0	0	0	0
M09Apr2010	0	0	0	0	0	0	0	0	0	0	0	0	0	0	0	0	0	0	0	0	0	0	0	0	0	0	0	0	0	0	0	0	0	0	0	0	0	0	0	0	0	0	0	0	0	0	0	0	0
M09Apr2010	0	0	0	0	0	0	1	0	0	0	2	0	0	0	0	0	0	0	0	0	0	0	0	0	0	0	0	0	0	2	0	0	0	0	0	0	0	0	1	0	0	0	0	0	0	0	0	0	0
M10Apr2010	0	0	0	0	0	0	0	0	0	0	0	0	0	0	0	0	0	0	0	0	0	0	0	0	0	0	0	0	0	0	0	0	0	0	0	0	0	0	0	0	0	0	0	0	0	0	0	0	0
M10Apr2010	0	0	0	0	0	0	3	0	0	0	0	0	0	0	0	0	0	0	0	0	0	0	0	0	0	0	0	0	0	0	0	0	0	0	0	0	0	0	1	0	0	0	0	0	0	0	0	0	0
M10Apr2010	0	0	0	0	0	0	0	0	0	0	0	0	0	0	0	0	0	0	0	0	0	0	0	0	0	0	0	0	0	0	0	0	0	0	0	0	0	0	0	0	0	0	0	0	0	0	0	0	0
M11Apr2010	0	0	0	0	0	0	0	0	0	0	2	0	0	0	0	0	0	0	0	0	0	0	0	0	0	0	0	0	0	1	0	0	0	0	0	0	0	0	0	0	0	0	0	0	0	0	0	0	0
M11Apr2010	0	0	0	0	0	0	2	0	0	0	0	0	0	0	0	0	0	0	0	0	0	0	0	0	0	0	0	0	0	0	0	0	0	0	0	0	0	0	0	0	0	0	0	0	0	0	0	0	0
M11Apr2010	0	0	0	0	0	0	0	0	0	0	2	0	0	0	0	0	0	0	0	0	0	0	0	0	0	0	0	0	0	0	0	0	0	0	0	0	0	0	0	0	0	0	0	0	0	0	0	0	0
M12Apr2010	0	0	0	0	0	0	0	0	0	0	0	0	0	0	0	0	0	0	0	0	0	0	0	0	0	0	0	0	0	1	0	0	0	0	0	0	0	0	1	0	0	0	0	0	0	0	0	0	0
M12Apr2010	0	0	0	0	0	0	0	0	0	0	0	0	0	0	0	0	0	0	0	0	0	0	0	0	0	0	0	0	0	5	0	0	0	0	0	0	0	0	2	0	0	0	0	0	0	0	0	0	0
M12Apr2010	0	0	0	0	0	0	0	0	0	0	0	0	0	0	0	0	0	0	0	1	0	0	0	0	0	0	0	0	0	14	0	0	0	0	0	0	0	0	1	0	0	0	0	0	0	0	0	0	0
M13Apr2010	0	1	0	0	0	0	0	0	0	0	0	0	0	0	0	0	0	0	0	0	0	0	0	0	0	0	0	0	0	0	0	0	0	0	0	0	0	0	0	0	0	0	0	0	0	0	0	0	0
M13Apr2010	0	1	0	0	0	0	0	0	0	0	0	0	0	0	0	0	0	0	0	0	0	0	0	0	0	0	0	0	0	0	0	0	0	0	0	0	0	0	0	0	0	0	0	0	0	0	0	0	0
M13Apr2010	0	0	0	0	0	0	0	0	0	0	0	0	0	0	0	0	0	0	0	0	0	0	0	0	0	0	0	0	0	0	0	0	0	0	0	0	0	0	0	0	0	0	0	0	0	0	0	0	0
M14Apr2010	0	0	0	0	0	0	0	0	0	0	0	0	0	0	0	0	0	0	0	0	0	0	0	0	0	0	0	0	0	0	0	0	0	0	0	0	0	0	0	0	0	0	0	0	0	0	0	0	0
M14Apr2010	0	0	0	0	0	0	0	0	0	0	0	0	0	0	0	0	0	0	0	0	0	0	0	0	0	0	0	0	0	0	0	0	0	0	0	0	0	0	0	0	0	0	0	0	0	0	0	0	0
M14Apr2010	0	0	0	0	0	0	0	0	0	0	0	0	0	0	0	0	0	0	0	0	0	0	0	0	0	0	0	0	0	0	0	0	0	0	0	0	0	0	0	0	0	0	0	0	0	0	0	0	0
M01Jul2010	0	0	0	0	0	0	0	0	0	0	0	0	0	0	0	0	0	0	0	0	0	0	0	0	0	0	0	0	0	0	0	0	0	0	0	0	0	0	0	0	0	0	0	0	0	0	0	0	0
M01Jul2010	0	0	0	0	0	0	0	0	0	0	0	0	0	0	0	0	0	0	0	0	0	0	0	0	0	0	0	0	0	0	0	0	0	0	0	0	0	0	0	0	0	0	0	0	0	0	0	0	0
M01Jul2010	0	0	0	0	0	0	0	0	0	0	0	0	0	0	0	0	0	0	0	0	0	0	0	0	0	0	0	0	0	0	0	0	0	0	0	0	0	0	0	0	0	0	0	0	0	0	0	0	0
M02Jul2010	0	0	0	0	0	0	0	0	0	0	0	0	0	0	0	0	0	0	0	0	0	0	0	0	0	0	0	0	0	0	0	0	0	0	0	0	0	0	0	0	0	0	0	0	0	0	0	0	0
M02Jul2010	0	0	0	0	0	0	0	0	0	0	0	0	0	0	0	0	0	0	0	0	0	0	0	0	0	0	0	0	0	0	0	0	0	0	0	0	0	0	0	0	0	0	0	0	0	0	0	0	0
M02Jul2010	0	0	0	0	0	0	0	0	0	0	0	0	0	0	0	0	0	0	0	0	0	0	0	0	0	0	0	0	0	0	0	0	0	0	0	0	0	0	0	0	0	0	0	0	0	0	0	0	0
M03Jul2010	0	0	0	0	0	0	0	0	0	0	0	0	0	0	0	0	0	0	0	0	0	0	0	0	0	0	0	0	0	0	0	0	0	0	0	0	0	0	0	0	0	0	0	0	0	0	0	0	0
M03Jul2010	0	0	0	0	0	0	0	0	0	0	0	0	0	0	0	0	0	0	0	0	0	0	0	0	0	0	0	0	0	0	0	0	0	0	0	0	0	0	0	0	0	0	0	0	0	0	0	0	0
M03Jul2010	0	0	0	0	0	0	0	0	0	0	0	0	0	0	0	0	0	0	0	0	0	0	0	0	0	0	0	0	0	0	0	0	0	0	0	0	0	0	0	0	0	0	0	0	0	0	0	0	0
M05Jul2010	0	0	0	0	0	0	0	0	0	0	0	0	0	0	0	0	0	0	0	0	0	0	0	0	0	0	0	0	0	0	0	0	0	0	0	0	0	0	0	0	0	0	0	0	0	0	0	0	0
M05Jul2010	0	0	0	0	0	0	0	0	0	0	0	0	0	0	0	0	0	0	0	0	0	0	0	0	0	0	0	0	0	0	0	0	0	0	0	0	0	0	0	0	0	0	0	0	0	0	0	0	0
M05Jul2010	0	0	0	0	0	0	0	0	0	0	0	0	0	0	0	0	0	0	0	0	0	0	0	0	0	0	0	0	0	0	0	0	0	0	0	0	0	0	0	0	0	0	0	0	0	0	0	0	0
M06Jul2010	0	0	0	0	0	0	0	0	0	0	0	0	0	0	0	0	0	0	0	0	0	0	0	0	0	0	0	0	0	0	0	0	0	0	0	0	0	0	0	0	0	0	0	0	0	0	0	0	0
M06Jul2010	0	0	0	0	0	0	0	0	0	0	0	0	0	0	0	0	0	0	0	0	0	0	0	0	0	0	0	0	0	0	0	0	0	0	0	0	0	0	0	0	0	0	0	0	0	0	0	0	0
M06Jul2010	0	0	0	0	0	0	0	0	0	0	0	0	0	0	0	0	0	0	0	0	0	0	0	0	0	0	0	0	0	0	0	0	0	0	0	0	0	0	0	0	0	0	0	0	0	0	0	0	0
M07Jul2010	0	0	0	0	0	0	1	0	0	0	1	0	0	0	0	0	0	0	0	0	0	0	0	0	0	0	0	0	0	2	0	0	0	0	0	0	0	0	2	0	0	0	0	0	0	0	0	0	0
M07Jul2010	0	0	0	0	0	0	3	0	0	0	2	0	0	0	0	1	0	0	0	0	0	0	0	0	0	0	0	0	0	10	0	0	0	0	0	0	0	0	0	0	0	0	0	0	0	0	0	0	0
M07Jul2010	0	0	0	0	0	0	2	0	0	0	0	0	0	0	0	0	0	0	0	0	0	0	0	0	0	0	0	0	0	0	0	0	0	0	0	0	0	0	0	0	0	0	0	0	0	0	0	0	0
M08Jul2010	0	0	0	0	0	0	3	0	0	0	3	0	0	0	0	0	0	0	0	0	0	0	0	0	0	0	0	0	0	1	0	0	0	0	0	0	0	0	0	0	0	0	0	0	0	0	0	0	0
M08Jul2010	0	0	0	0	0	0	5	0	0	0	0	0	0	0	0	0	0	0	0	0	0	0	0	0	0	0	0	0	0	0	0	0	0	0	0	0	0	0	0	0	0	0	0	0	0	0	0	0	0
M08Jul2010	1	0	0	0	0	0	9	0	0	0	2	0	0	0	0	0	0	0	0	0	0	0	0	0	0	0	0	0	0	0	0	0	0	0	0	0	0	0	0	0	0	0	0	0	0	0	0	0	0
M09Jul2010	0	0	0	0	0	0	0	0	0	0	1	0	0	0	0	0	0	0	0	0	0	0	0	0	1	0	0	0	0	0	0	0	0	0	0	0	0	0	0	0	0	0	0	0	0	0	0	0	0
M09Jul2010	0	0	0	0	0	0	1	0	0	0	1	0	0	0	0	0	0	0	0	0	0	0	0	0	0	0	0	0	0	1	0	0	0	0	0	0	0	0	0	0	0	0	0	0	0	0	0	0	0
M09Jul2010	0	0	0	0	0	0	1	0	0	0	0	0	0	0	0	0	0	0	0	0	0	0	0	0	0	0	0	0	0	2	0	0	0	0	0	0	0	0	0	0	0	0	0	0	0	0	0	0	0
M10Jul2010	0	0	0	0	0	0	0	0	0	0	0	0	0	0	0	0	0	0	0	0	0	0	0	0	0	0	0	0	0	0	0	0	0	0	0	0	0	0	0	0	0	0	0	0	0	0	0	0	0
M10Jul2010	0	0	0	0	0	0	0	0	0	0	0	0	0	0	0	0	0	0	0	0	0	0	0	0	0	0	0	0	0	0	0	0	0	0	0	0	0	0	0	0	0	0	0	0	0	0	0	0	0
M10Jul2010	0	0	0	0	0	0	0	0	0	0	0	0	0	0	0	0	0	0	0	0	0	0	0	0	0	0	0	0	0	0	0	0	0	0	0	0	0	0	0	0	0	0	0	0	0	0	0	0	0
M11Jul2010	0	0	0	0	0	0	2	0	0	0	0	0	0	0	0	0	0	0	0	1	0	0	0	0	0	0	0	0	0	0	0	0	0	0	0	0	0	0	0	0	0	0	0	0	0	0	0	0	0
M11Jul2010	0	0	0	0	0	0	1	0	0	0	0	0	0	0	0	0	0	0	0	0	0	0	0	0	0	0	0	0	0	0	0	0	0	0	0	0	0	0	0	0	0	0	0	0	0	0	0	0	0
M11Jul2010	0	0	0	0	0	0	0	0	0	0	0	0	0	0	0	0	0	0	0	0	0	0	0	0	0	0	0	0	0	0	0	0	0	0	0	0	0	0	0	0	0	0	0	0	0	0	0	0	0
M12Jul2010	0	0	0	0	0	0	0	0	0	0	0	0	0	0	0	0	0	0	0	0	0	0	0	1	0	0	0	0	0	3	0	0	0	0	0	0	0	0	1	0	0	0	0	0	0	0	0	0	0
M12Jul2010	0	0	0	0	0	0	0	0	0	0	0	0	0	0	0	0	0	0	0	0	0	0	0	0	0	0	0	0	0	13	0	0	0	0	0	0	0	0	1	0	0	0	0	0	0	0	0	0	0
M12Jul2010	0	0	0	0	0	0	0	0	0	0	0	0	0	0	0	0	0	0	0	0	0	0	0	0	0	0	0	0	0	5	0	0	0	0	0	0	0	0	1	0	0	0	0	0	0	0	0	0	0
M13Jul2010	0	0	0	0	0	0	0	0	0	0	0	0	0	0	0	0	0	0	0	0	0	0	0	0	0	0	0	0	0	0	0	0	0	0	0	0	0	0	0	0	0	0	0	0	0	0	0	0	0
M13Jul2010	0	0	0	0	0	0	0	0	0	0	0	0	0	0	0	0	0	0	0	0	0	0	0	0	0	0	0	0	0	0	0	0	0	0	0	0	0	0	0	0	0	0	0	0	0	0	0	0	0
M13Jul2010	0	0	0	0	0	0	0	0	0	0	0	0	0	0	0	0	0	0	0	0	0	0	0	0	0	0	0	0	0	0	0	0	0	0	0	0	0	0	0	0	0	0	0	0	0	0	0	0	0
M14Jul2010	0	0	0	0	0	0	0	0	0	0	0	0	0	0	0	0	0	0	0	0	0	0	0	0	0	0	0	0	0	0	0	0	0	0	0	0	0	0	0	0	0	0	0	0	0	0	0	0	0
M14Jul2010	0	0	0	0	0	0	0	0	0	0	0	0	0	0	0	0	0	0	0	0	0	0	0	0	0	0	0	0	0	0	0	0	0	0	0	0	0	0	0	0	0	0	0	0	0	0	0	0	0
M14Jul2010	0	0	0	0	0	0	0	0	0	0	0	0	0	0	0	0	0	0	0	0	0	0	0	0	0	0	0	0	0	0	0	0	0	0	0	0	0	0	0	0	0	0	0	0	0	0	0	0	0
M01Oct2010	0	0	0	0	0	0	0	0	0	0	0	0	0	0	0	0	0	0	0	0	0	0	0	0	0	0	0	0	0	0	0	0	0	0	0	0	0	0	0	0	0	0	0	0	0	0	0	0	0
M01Oct2010	0	0	0	0	0	0	0	0	0	0	0	0	0	0	0	0	0	0	0	0	0	0	0	0	0	0	0	0	0	0	0	0	0	0	0	0	0	0	0	0	0	0	0	0	0	0	0	0	0
M01Oct2010	0	0	0	0	0	0	0	0	0	0	0	0	0	0	0	0	0	0	0	0	0	0	0	0	0	0	0	0	0	0	0	0	0	0	0	0	0	0	0	0	0	0	0	0	0	0	0	0	0
M02Oct2010	0	0	0	0	0	0	0	0	0	0	0	0	0	0	0	0	0	0	0	0	0	0	0	0	0	0	0	0	0	0	0	0	0	0	0	0	0	0	0	0	0	0	0	0	0	0	0	0	0
M02Oct2010	0	0	0	0	0	0	0	0	0	0	0	0	0	0	0	0	0	0	0	0	0	0	0	0	0	0	0	0	0	0	0	0	0	0	0	0	0	0	0	0	0	0	0	0	0	0	0	0	0
M02Oct2010	0	0	0	0	0	0	0	0	0	0	0	0	0	0	0	0	0	0	0	0	0	0	0	0	0	0	0	0	0	0	0	0	0	0	0	0	0	0	0	0	0	0	0	0	0	0	0	0	0
M04Oct2010	0	0	0	0	0	0	0	0	0	0	0	0	0	0	0	0	0	0	0	0	0	0	0	0	0	0	0	0	0	0	0	0	0	0	0	0	0	0	0	0	0	0	0	0	0	0	0	0	0
M04Oct2010	0	0	0	0	0	0	0	0	0	0	0	0	0	0	0	0	0	0	0	0	0	0	0	0	0	0	0	0	0	0	0	0	0	0	0	0	0	0	0	0	0	0	0	0	0	0	0	0	0
M04Oct2010	0	0	0	0	0	0	0	0	0	0	0	0	0	0	0	0	0	0	0	0	0	0	0	0	0	0	0	0	0	0	0	0	0	0	0	0	0	0	0	0	0	0	0	0	0	0	0	0	0
M06Oct2010	0	0	0	0	0	0	0	0	0	0	0	0	0	0	0	0	0	0	0	0	0	0	0	0	0	0	0	0	0	0	0	0	0	0	0	0	0	0	0	0	0	0	0	0	0	0	0	0	0
M06Oct2010	0	0	0	0	0	0	0	0	0	0	1	0	0	0	0	0	0	0	0	0	0	0	0	0	0	0	0	0	0	0	0	0	0	0	0	0	0	0	0	0	0	0	0	0	0	0	0	0	0
M06Oct2010	0	0	0	0	0	0	0	0	0	0	1	0	0	0	0	1	0	0	0	0	0	0	0	0	0	0	0	0	0	0	0	0	0	0	0	0	0	0	0	0	0	0	0	0	0	0	0	0	0
M07Oct2010	0	0	0	0	0	0	0	0	0	0	0	0	0	0	0	0	0	0	0	0	0	0	0	0	0	0	0	0	0	0	0	0	0	0	0	0	0	0	0	0	0	0	0	0	0	0	0	0	0
M07Oct2010	0	0	0	0	0	0	0	0	0	0	0	0	0	0	0	0	0	0	0	1	0	0	0	0	0	0	0	0	0	1	0	0	0	0	0	0	0	1	2	0	0	0	0	0	0	0	0	0	0
M07Oct2010	1	0	0	0	0	0	0	0	0	0	0	0	0	0	0	0	0	0	0	1	0	0	0	0	0	0	0	0	0	7	0	0	0	0	0	0	0	0	0	0	0	0	0	0	0	0	0	0	0
M08Oct2010	0	0	0	0	0	0	2	0	0	0	3	0	0	0	0	0	0	0	0	1	0	0	0	0	0	0	0	0	0	0	0	0	0	0	0	0	0	0	0	0	0	0	0	0	0	0	0	0	0
M08Oct2010	0	0	0	0	0	0	0	0	0	0	0	0	0	0	0	0	0	0	0	1	0	0	0	0	0	0	0	0	0	3	0	0	0	0	0	0	0	0	0	0	0	0	0	0	0	0	0	0	0
M08Oct2010	0	0	0	0	0	0	2	0	0	0	3	0	0	0	0	0	0	0	0	0	0	0	0	0	0	0	0	0	0	1	0	0	0	0	0	0	0	0	0	0	0	0	0	0	0	0	0	0	0
M09Oct2010	0	0	0	0	0	0	0	0	0	0	4	0	0	0	0	0	0	0	0	1	0	0	0	0	0	0	0	0	0	4	0	0	0	0	0	0	0	0	0	0	0	0	0	0	1	0	0	0	0
M09Oct2010	0	0	0	0	0	0	0	0	0	0	2	0	0	0	0	0	0	0	0	0	0	0	0	0	0	0	0	0	0	2	0	0	0	0	0	0	0	0	0	0	0	0	0	0	0	0	0	0	0
M09Oct2010	0	0	0	0	0	0	0	0	0	0	1	0	0	0	0	0	0	0	0	0	0	0	0	0	0	0	0	0	0	0	0	0	0	0	0	0	0	0	0	0	0	0	0	0	0	0	0	0	0
M10Oct2010	0	0	0	0	0	0	0	0	0	0	0	0	0	0	0	0	0	0	0	0	0	0	0	0	0	0	0	0	0	0	0	0	0	0	0	0	0	0	0	0	0	0	0	0	0	0	0	0	0
M10Oct2010	0	0	0	0	0	0	0	0	0	0	1	0	0	0	0	0	0	0	0	0	0	0	0	0	0	0	0	0	0	0	0	0	0	0	0	0	0	0	0	0	0	0	0	0	0	0	0	0	0
M10Oct2010	0	0	0	0	0	0	0	0	0	0	0	0	0	0	0	0	0	0	0	0	0	0	0	0	0	0	1	0	0	1	0	0	0	0	0	0	0	0	0	0	0	0	0	0	0	0	0	0	0
M11Oct2010	0	0	0	0	0	0	0	0	0	0	1	0	0	0	0	0	0	0	0	0	0	0	0	0	0	0	0	0	0	0	0	0	0	0	0	0	0	0	0	0	0	0	0	0	0	0	0	0	0
M11Oct2010	0	0	0	0	0	0	0	0	0	0	0	0	0	0	0	0	0	0	0	0	0	0	0	0	0	0	0	0	0	0	0	0	0	0	0	0	0	0	0	0	0	0	0	0	0	0	0	0	0
M11Oct2010	0	0	0	0	0	0	0	0	0	0	0	0	0	0	0	0	0	0	0	0	0	0	0	0	0	0	0	0	0	0	0	0	0	0	0	0	0	0	0	0	0	0	0	0	0	0	0	0	0
M12Oct2010	0	0	0	0	0	0	1	0	0	0	0	0	0	0	0	0	0	0	0	0	0	0	0	0	0	0	0	0	0	1	0	0	0	0	0	0	0	0	0	0	0	0	0	0	0	0	0	0	0
M12Oct2010	0	0	0	0	0	0	0	0	0	0	0	0	0	0	0	0	0	0	0	0	0	0	0	0	0	0	0	0	0	1	0	0	0	0	0	0	0	0	0	0	0	0	0	0	0	0	0	0	0
M12Oct2010	0	0	0	0	0	0	1	0	0	0	0	0	0	0	0	0	0	0	0	0	0	0	0	0	0	0	0	0	0	11	0	0	0	0	0	0	0	0	0	0	0	0	0	0	0	0	0	0	0
M13Oct2010	0	0	0	0	0	0	0	0	0	0	0	0	0	0	0	0	0	0	0	5	0	0	0	0	0	0	0	0	0	1	0	0	0	0	0	0	0	0	0	0	0	0	0	0	4	0	0	0	0
M13Oct2010	0	0	0	0	0	0	0	0	0	0	0	0	0	0	0	0	0	0	0	0	0	0	0	0	0	0	0	0	0	0	0	0	0	1	0	0	0	0	0	0	0	0	0	0	0	0	0	0	0
M13Oct2010	0	0	0	0	0	0	0	0	0	0	0	0	0	0	0	1	0	0	0	0	0	0	0	0	0	0	0	0	0	1	0	0	0	0	0	0	0	0	0	0	0	0	0	0	0	0	0	0	0
M14Oct2010	0	0	0	0	0	0	0	0	0	0	0	0	0	0	0	0	0	0	0	0	0	0	0	0	0	0	0	0	0	0	0	0	0	0	0	0	0	0	0	0	0	0	0	0	0	0	0	0	0
M14Oct2010	0	0	0	0	0	0	0	0	0	0	0	0	0	0	0	0	0	0	0	0	0	0	0	0	0	0	0	0	0	0	0	0	0	0	0	0	0	0	0	0	0	0	0	0	0	0	0	0	0
M14Oct2010	0	0	0	0	0	0	0	0	0	0	0	0	0	0	0	0	0	0	0	0	0	0	0	0	0	0	0	0	0	0	0	0	0	0	0	0	0	0	0	0	0	0	0	0	0	0	0	0	0
M01Jan2011	0	0	0	0	0	0	0	0	0	0	0	0	0	0	0	0	0	0	0	0	0	0	0	0	0	0	0	0	0	0	0	0	0	0	0	0	0	0	0	0	0	0	0	0	0	0	0	0	0
M01Jan2011	0	0	0	0	0	0	0	0	0	0	0	0	0	0	0	0	0	0	0	0	0	0	0	0	0	0	0	0	0	0	0	0	0	0	0	0	0	0	0	0	0	0	0	0	0	0	0	0	0
M01Jan2011	0	0	0	0	0	0	0	0	0	0	0	0	0	0	0	0	0	0	0	0	0	0	0	0	0	0	0	0	0	0	0	0	0	0	0	0	0	0	0	0	0	0	0	0	0	0	0	0	0
M02Jan2011	0	0	0	0	0	0	0	0	0	0	0	0	0	0	0	0	0	0	0	0	0	0	0	0	0	0	0	0	0	0	0	0	0	0	0	0	0	0	1	0	0	0	0	0	0	0	0	0	0
M02Jan2011	0	0	0	0	0	0	0	0	0	0	0	0	0	0	0	0	0	0	0	0	0	0	0	0	0	0	0	0	0	0	0	0	0	0	0	0	0	0	0	0	0	0	0	0	0	0	0	0	0
M02Jan2011	0	0	0	0	0	0	0	0	0	0	0	0	0	0	0	0	0	0	0	0	0	0	0	0	0	0	0	0	0	0	0	0	0	0	0	0	0	0	0	0	0	0	0	0	0	0	0	0	0
M03Jan2011	0	0	0	0	0	0	0	0	0	0	0	0	0	0	0	0	0	0	0	0	0	0	0	0	0	0	0	0	0	0	0	0	0	0	0	0	0	0	0	0	0	0	0	0	0	0	0	0	0
M03Jan2011	0	0	0	0	0	0	0	0	0	0	0	0	0	0	0	0	0	0	0	0	0	0	0	0	0	0	0	0	0	0	0	0	0	0	0	0	0	0	0	0	0	0	0	0	0	0	0	0	0
M03Jan2011	0	0	0	0	0	0	0	0	0	0	0	0	0	0	0	0	0	0	0	0	0	0	0	0	0	0	0	0	0	0	0	0	0	0	0	0	0	0	0	0	0	0	0	0	0	0	0	0	0
M04Jan2011	0	0	0	0	0	0	0	0	0	0	0	0	0	0	0	0	0	0	0	0	0	0	0	0	0	0	0	0	0	0	0	0	0	0	0	0	0	0	0	0	0	0	0	0	0	0	0	0	0
M04Jan2011	0	0	0	0	0	0	0	0	0	0	0	0	0	0	0	0	0	0	0	0	0	0	0	0	0	0	0	0	0	0	0	0	0	0	0	0	0	0	0	0	0	0	0	0	0	0	0	0	0
M04Jan2011	0	0	0	0	0	0	0	0	0	0	0	0	0	0	0	0	0	0	0	0	0	0	0	0	0	0	0	0	0	0	0	0	0	0	0	0	0	0	0	0	0	0	0	0	0	0	0	0	0
M05Jan2011	0	0	0	0	0	0	0	0	0	0	0	0	0	0	0	0	0	0	0	0	0	0	0	0	0	0	0	0	0	0	0	0	0	0	0	0	0	0	0	0	0	0	0	0	0	0	0	0	0
M05Jan2011	0	0	0	0	0	0	0	0	0	0	0	0	0	0	0	0	0	0	0	0	0	0	0	0	0	0	0	0	0	0	0	0	0	0	0	0	0	0	0	0	0	0	0	0	0	0	0	0	0
M05Jan2011	0	0	0	0	0	0	0	0	0	0	0	0	0	0	0	0	0	0	0	0	0	0	0	0	0	0	0	0	0	0	0	0	0	0	0	0	0	0	0	0	0	0	0	0	0	0	0	0	0
M06Jan2011	0	0	0	0	0	0	0	0	0	0	0	0	0	0	0	0	0	0	0	0	0	0	0	0	0	0	0	0	0	0	0	0	0	0	0	0	0	0	0	0	0	0	0	0	0	0	0	0	0
M06Jan2011	0	0	0	0	0	0	0	0	0	0	0	0	0	0	0	0	0	0	0	0	0	0	0	0	0	0	0	0	0	0	0	0	0	0	0	0	0	0	0	0	0	0	0	0	0	0	0	0	0
M06Jan2011	0	0	0	0	0	0	0	0	0	0	0	0	0	0	0	0	0	0	0	0	0	0	0	0	0	0	0	0	0	0	0	0	0	0	0	0	0	0	0	0	0	0	0	0	0	0	0	0	0
M07Jan2011	0	2	0	0	0	0	0	0	0	0	0	0	0	0	0	0	0	0	0	0	0	0	0	0	0	0	0	0	0	0	0	0	0	0	0	0	0	0	3	0	0	0	0	0	0	0	0	0	0
M07Jan2011	0	4	0	0	0	0	3	0	0	0	0	0	0	0	0	0	0	0	0	0	0	0	0	0	0	0	0	0	0	4	0	0	0	0	0	0	0	0	1	0	0	0	0	0	0	0	0	0	0
M07Jan2011	0	5	0	0	0	0	0	0	0	0	0	0	0	0	0	0	0	0	0	0	0	0	0	0	0	0	0	0	0	0	0	0	0	0	0	0	0	0	2	0	0	0	0	0	0	0	0	0	0
M08Jan2011	0	1	0	0	0	0	0	0	0	0	0	0	0	0	0	0	0	0	0	2	0	0	0	0	0	0	0	0	0	0	0	0	0	0	0	0	0	0	1	0	0	0	0	0	0	0	0	0	0
M08Jan2011	0	4	0	0	0	0	9	0	0	0	3	0	0	0	0	0	0	0	0	1	0	0	0	0	0	0	0	0	0	1	0	0	0	0	0	0	0	0	0	0	0	0	0	0	0	0	0	0	0
M08Jan2011	0	3	0	0	0	0	0	0	0	0	2	0	0	0	0	0	0	0	0	0	0	0	0	0	0	0	1	0	0	0	0	0	0	0	0	1	0	0	2	0	0	0	0	2	0	0	0	0	0
M09Jan2011	1	0	0	0	0	0	0	0	0	0	0	0	0	0	0	0	0	0	0	0	0	0	0	0	0	0	0	0	0	1	0	0	0	0	0	0	0	0	1	0	0	0	0	0	0	0	0	0	0
M09Jan2011	5	0	0	0	0	0	8	0	0	0	0	0	0	0	0	0	1	0	0	0	0	0	0	0	0	0	0	0	0	0	0	0	0	0	0	0	0	0	0	0	0	0	0	0	0	0	0	0	0
M09Jan2011	2	0	0	0	0	0	6	0	0	0	0	0	0	0	0	0	1	0	0	0	0	0	0	0	0	0	0	0	0	1	0	0	0	0	0	0	0	0	1	0	0	0	0	0	0	0	0	0	0
M10Jan2011	0	0	0	0	0	0	7	0	0	0	0	0	0	0	0	0	0	0	0	0	0	0	0	0	0	0	0	0	0	0	0	0	0	0	0	0	0	0	0	0	0	0	0	0	0	0	0	0	0
M10Jan2011	0	0	0	0	0	0	8	0	0	0	0	0	0	0	0	0	0	0	0	0	0	0	0	0	0	0	0	0	0	0	0	0	0	0	0	0	0	0	0	0	0	0	0	0	0	0	0	0	0
M10Jan2011	0	0	0	0	0	0	3	0	0	0	0	0	0	0	0	0	0	0	0	0	0	0	0	0	0	0	0	0	0	0	0	0	0	0	0	0	0	0	0	0	0	0	0	0	0	0	0	0	0
M11Jan2011	0	0	0	0	0	0	2	0	0	0	0	0	0	0	0	0	0	0	0	0	0	0	0	0	0	0	0	0	0	0	0	0	0	0	0	0	0	0	0	0	0	0	0	0	0	0	0	0	0
M11Jan2011	0	0	0	0	0	0	0	0	0	0	0	0	0	0	0	0	0	0	0	0	0	0	0	0	0	0	0	0	0	0	0	0	0	0	0	0	0	0	0	0	0	0	0	0	0	0	0	0	0
M11Jan2011	0	0	0	0	0	0	0	0	0	0	0	0	0	0	0	0	0	0	0	0	0	0	0	0	0	0	0	0	0	0	0	0	0	0	0	0	0	0	0	0	0	0	0	0	0	0	0	0	0
M12Jan2011	0	0	0	0	0	0	0	0	0	0	0	0	0	0	0	0	0	0	0	0	0	0	0	0	0	0	0	0	0	13	0	0	0	0	0	0	0	0	1	0	0	0	0	0	0	0	0	0	0
M12Jan2011	0	0	0	0	0	0	0	0	0	0	0	0	0	0	0	0	0	0	0	0	0	0	0	0	0	0	0	0	0	0	0	0	0	0	0	0	0	0	0	0	0	0	0	0	0	0	0	0	0
M12Jan2011	0	0	0	0	0	0	0	0	0	0	0	0	0	0	0	0	0	0	0	0	0	0	0	0	0	0	0	0	0	0	0	0	0	0	0	0	0	0	1	0	0	0	0	0	0	0	0	0	0
M13Jan2011	1	0	0	0	0	0	0	0	0	0	0	0	0	0	0	0	0	0	0	0	0	0	0	0	0	0	0	0	0	2	0	0	0	0	1	0	0	0	0	0	0	0	0	0	0	0	0	0	0
M13Jan2011	0	0	0	0	0	0	0	0	0	0	0	0	0	0	0	0	0	0	0	0	0	0	0	0	0	0	1	0	0	0	0	0	0	0	0	0	0	0	0	0	0	0	0	0	0	0	0	0	0
M13Jan2011	5	0	0	0	0	0	0	0	0	0	0	0	0	0	0	2	0	0	0	0	0	0	0	0	0	0	3	0	0	0	0	0	0	0	0	0	0	0	0	0	0	0	0	0	0	0	0	0	0
M14Jan2011	0	0	0	0	0	0	0	0	0	0	0	0	0	0	0	0	0	0	0	0	0	0	0	0	0	0	0	0	0	0	0	0	0	0	0	0	0	0	0	0	0	0	0	0	0	0	0	0	0
M14Jan2011	0	0	0	0	0	0	0	0	0	0	0	0	0	0	0	0	0	0	0	0	0	0	0	0	0	0	0	0	0	0	0	0	0	0	0	0	0	0	0	0	0	0	0	0	0	0	0	0	0
M14Jan2011	0	0	0	0	0	0	0	0	0	0	0	0	0	0	0	0	0	0	0	0	0	0	0	0	0	0	0	0	0	0	0	0	0	0	0	0	0	0	0	0	0	0	0	0	0	0	0	0	0
M01Apr2011	0	0	0	0	0	0	0	0	0	0	0	0	0	0	0	0	0	0	0	0	0	0	0	0	0	0	0	0	0	0	0	0	0	0	0	0	0	0	0	0	0	0	0	0	0	0	0	0	0
M01Apr2011	0	0	0	0	0	0	0	0	0	0	0	0	0	0	0	0	0	0	0	0	0	0	0	0	0	0	0	0	0	0	0	0	0	0	0	0	0	0	0	0	0	0	0	0	0	0	0	0	0
M01Apr2011	0	0	0	0	0	0	0	0	0	0	0	0	0	0	0	0	0	0	0	0	0	0	0	0	0	0	0	0	0	0	0	0	0	0	0	0	0	0	0	0	0	0	0	0	0	0	0	0	0
M02Apr2011	0	0	0	0	0	0	0	0	0	0	0	0	0	0	0	0	0	0	0	4	0	0	0	0	0	0	0	0	0	0	0	0	0	0	0	0	0	0	1	0	0	0	0	0	0	0	0	0	0
M02Apr2011	0	0	0	0	0	0	0	0	0	0	0	0	0	0	0	0	0	0	0	6	0	0	0	0	0	0	0	0	0	0	0	0	0	0	0	0	0	0	0	0	0	0	0	0	0	0	0	0	0
M02Apr2011	0	0	0	0	0	0	0	0	0	0	0	0	0	0	0	0	0	0	0	4	0	0	0	0	0	0	0	0	0	0	0	0	0	0	0	0	0	0	0	0	0	0	0	0	0	0	0	0	0
M03Apr2011	0	0	0	0	0	0	0	0	0	0	0	0	0	0	0	0	0	0	0	0	0	0	0	0	0	0	0	0	0	0	0	0	0	0	0	0	0	0	0	0	0	0	0	0	0	0	0	0	0
M03Apr2011	0	0	0	0	0	0	0	0	0	0	0	0	0	0	0	0	0	0	0	0	0	0	0	0	0	0	0	0	0	0	0	0	0	0	0	0	0	0	0	0	0	0	0	0	0	0	0	0	0
M03Apr2011	0	0	0	0	0	0	0	0	0	0	0	0	0	0	0	0	0	0	0	0	0	0	0	0	0	0	0	0	0	0	0	0	0	0	0	0	0	0	0	0	0	0	0	0	0	0	0	0	0
M04Apr2011	0	0	0	0	0	0	0	0	0	0	0	0	0	0	0	0	0	0	0	0	0	0	0	0	0	0	0	0	0	0	0	0	0	0	0	0	0	0	0	0	0	0	0	0	0	0	0	0	0
M04Apr2011	0	0	0	0	0	0	0	0	0	0	0	0	0	0	0	0	0	0	0	0	0	0	0	0	0	0	0	0	0	0	0	0	0	0	0	0	0	0	0	0	0	0	0	0	0	0	0	0	0
M04Apr2011	0	0	0	0	0	0	0	0	0	0	0	0	0	0	0	0	0	0	0	0	0	0	0	0	0	0	0	0	0	0	0	0	0	0	0	0	0	0	0	0	0	0	0	0	0	0	0	0	0
M05Apr2011	0	0	0	0	0	0	0	0	0	0	0	0	0	0	0	0	0	0	0	0	0	0	0	0	0	0	0	0	0	0	0	0	0	0	0	0	0	0	0	0	0	0	0	0	0	0	0	0	0
M05Apr2011	0	0	0	0	0	0	0	0	0	0	0	0	0	0	0	0	0	0	0	0	0	0	0	0	0	0	0	0	0	0	0	0	0	0	0	0	0	0	0	0	0	0	0	0	0	0	0	0	0
M05Apr2011	0	0	0	0	0	0	0	0	0	0	0	0	0	0	0	0	0	0	0	0	0	0	0	0	0	0	0	0	0	0	0	0	0	0	0	0	0	0	0	0	0	0	0	0	0	0	0	0	0
M06Apr2011	0	0	0	0	0	0	0	0	0	0	0	0	0	0	0	0	0	0	0	0	0	0	0	0	0	0	0	0	0	0	0	0	0	0	0	0	0	0	3	0	0	0	0	0	0	0	0	0	0
M06Apr2011	0	0	0	0	0	0	0	0	0	0	0	0	0	0	0	0	0	0	0	0	0	0	0	0	0	0	0	0	0	0	0	0	0	0	0	0	0	0	1	0	0	0	0	0	0	0	0	0	0
M06Apr2011	0	0	0	0	0	0	0	0	0	0	0	0	0	0	0	0	0	0	0	0	0	0	0	0	0	0	0	0	0	0	0	0	0	0	0	0	0	0	2	0	0	0	0	0	0	0	0	0	0
M07Apr2011	1	0	0	0	0	0	0	0	0	0	0	0	0	0	0	0	0	0	0	0	0	0	0	0	0	0	0	0	0	0	0	0	0	0	0	0	0	0	0	0	0	0	0	0	1	0	0	0	0
M07Apr2011	1	0	0	0	0	0	2	0	0	0	0	0	0	0	0	0	0	0	0	0	0	0	0	0	0	0	0	0	0	0	0	0	0	0	0	0	0	0	0	0	0	0	0	0	0	0	0	0	0
M07Apr2011	1	0	0	0	0	0	0	0	0	0	0	0	0	0	0	0	0	0	0	0	0	0	0	0	0	0	0	0	0	0	0	0	0	0	0	0	0	0	0	0	0	0	0	0	0	0	0	0	0
M08Apr2011	1	0	0	0	0	0	2	0	0	0	0	0	0	0	0	0	0	0	0	0	0	0	0	0	0	0	0	0	0	3	0	0	0	0	0	0	0	0	0	0	0	0	0	0	1	0	0	0	0
M08Apr2011	1	0	0	0	0	0	1	0	0	0	0	0	0	0	0	0	0	0	0	0	0	0	0	0	0	0	0	0	0	2	0	0	0	0	0	0	0	0	0	0	0	0	0	0	2	0	0	0	0
M08Apr2011	0	0	0	0	0	0	3	0	0	0	0	0	0	0	0	0	0	0	0	0	0	0	0	0	0	0	0	0	0	0	0	0	0	0	0	0	0	0	0	0	0	0	0	0	1	0	0	0	0
M09Apr2011	2	0	0	0	0	0	2	0	0	0	0	0	0	0	0	0	0	0	1	0	0	0	0	0	0	0	0	0	0	0	0	0	0	0	0	0	0	0	0	0	0	0	0	0	0	0	0	0	0
M09Apr2011	0	0	0	0	0	0	1	0	0	0	0	0	0	0	0	0	0	0	0	0	0	0	0	0	0	0	0	0	0	0	0	0	0	0	0	0	0	0	0	0	0	0	0	0	0	0	0	0	0
M09Apr2011	1	0	0	0	0	0	0	0	0	0	0	0	0	0	0	0	0	0	0	0	0	0	0	0	0	0	0	0	0	1	0	0	0	0	0	0	0	0	0	0	0	0	0	0	1	0	0	0	0
M10Apr2011	0	0	0	0	0	0	2	0	0	0	0	0	0	0	0	0	0	0	0	0	0	0	0	0	0	0	0	0	0	1	0	0	0	0	0	0	0	0	0	0	0	0	0	0	0	0	0	0	0
M10Apr2011	0	0	0	0	0	0	2	0	0	0	0	0	0	0	0	0	0	0	0	0	0	0	0	0	0	0	0	0	0	0	0	0	0	0	0	0	0	0	0	0	0	0	0	0	0	0	0	0	0
M10Apr2011	0	0	0	0	0	0	4	0	0	0	0	0	0	0	0	0	0	0	0	0	0	0	0	0	0	0	0	0	0	0	0	0	0	0	0	0	0	0	0	0	0	0	0	0	0	0	0	0	0
M11Apr2011	0	0	0	0	0	0	2	0	0	0	0	0	0	0	0	0	0	0	0	0	0	0	0	0	0	0	0	0	0	0	0	0	0	0	0	0	0	0	0	0	0	0	0	0	0	0	0	0	0
M11Apr2011	0	0	0	0	0	0	0	0	0	0	0	0	0	0	0	0	0	0	0	0	0	0	0	0	0	0	0	0	0	0	0	0	0	0	0	0	0	0	0	0	0	0	0	0	0	0	0	0	0
M11Apr2011	0	0	0	0	0	0	1	0	0	0	0	0	0	0	0	0	0	0	0	0	0	0	0	0	0	0	0	0	0	0	0	0	0	0	0	0	0	0	0	0	0	0	0	0	0	0	0	0	0
M12Apr2011	0	0	0	0	0	0	1	0	0	0	0	0	0	0	0	0	0	0	0	0	0	0	0	0	0	0	0	0	0	0	0	0	0	0	0	0	0	0	0	0	0	0	0	0	0	0	0	0	0
M12Apr2011	0	0	0	0	0	0	0	0	0	0	0	0	0	0	0	0	0	0	0	0	0	0	0	0	0	0	0	0	0	0	0	0	0	0	0	0	0	1	0	0	0	0	0	0	0	0	0	0	0
M12Apr2011	0	0	0	0	0	0	0	0	0	0	0	0	0	0	0	0	0	0	0	0	0	0	0	0	0	0	0	0	0	0	0	0	0	0	0	0	0	0	1	0	0	0	0	0	0	0	0	0	0
M13Apr2011	0	0	0	0	1	0	0	0	0	0	0	0	0	0	0	1	0	0	0	0	0	0	0	0	0	0	0	0	0	2	0	0	0	0	0	0	0	0	0	0	0	0	0	0	0	0	0	0	0
M13Apr2011	0	0	0	0	2	0	0	0	0	0	0	0	0	0	0	0	0	0	0	0	0	0	0	0	0	0	0	0	0	0	0	0	0	0	0	0	0	0	1	0	0	0	0	0	0	0	0	0	0
M13Apr2011	0	0	0	0	0	0	1	0	0	0	0	0	0	0	0	1	0	0	0	0	0	0	0	0	0	0	0	0	0	0	0	0	0	0	0	0	0	0	0	0	0	0	0	0	0	0	0	0	0
M14Apr2011	0	0	0	0	0	0	0	0	0	0	0	0	0	0	0	0	0	0	0	0	0	0	0	0	0	0	0	0	0	0	0	0	0	0	0	0	0	0	0	0	0	0	0	0	0	0	0	0	0
M14Apr2011	0	0	0	0	0	0	0	0	0	0	0	0	0	0	0	0	0	0	0	0	0	0	0	0	0	0	0	0	0	0	0	0	0	0	0	0	0	0	0	0	0	0	0	0	0	0	0	0	0
M14Apr2011	0	0	0	0	0	0	0	0	0	0	0	0	0	0	0	0	0	0	0	0	0	0	0	0	0	0	0	0	0	0	0	0	0	0	0	0	0	0	0	0	0	0	0	0	0	0	0	0	0
M15Apr2011	0	0	0	0	0	0	0	0	0	0	0	0	0	0	0	0	0	0	0	0	0	0	0	0	0	0	0	0	0	0	0	0	0	0	0	0	0	0	0	0	0	0	0	0	0	0	0	0	0
M15Apr2011	0	0	0	0	0	0	0	0	0	0	0	0	0	0	0	0	0	0	0	0	0	0	0	0	0	0	0	0	0	0	0	0	0	0	0	0	0	0	0	0	0	0	0	0	0	0	0	0	0
M15Apr2011	0	0	0	0	0	0	0	0	0	0	0	0	0	0	0	0	0	0	0	0	0	0	0	0	0	0	0	0	0	0	0	0	0	0	0	0	0	0	0	0	0	0	0	0	0	0	0	0	0
M01Jul2011	0	0	0	0	0	0	0	0	0	0	0	0	0	0	0	0	0	0	0	0	0	0	0	0	0	0	0	0	0	0	0	0	0	0	0	0	0	0	0	0	0	0	0	0	0	0	0	0	0
M01Jul2011	0	0	0	0	0	0	0	0	0	0	0	0	0	0	0	0	0	0	0	0	0	0	0	0	0	0	0	0	0	0	0	0	0	0	0	0	0	0	0	0	0	0	0	0	0	0	0	0	0
M01Jul2011	0	0	0	0	0	0	0	0	0	0	0	0	0	0	0	0	0	0	0	0	0	0	0	0	0	0	0	0	0	0	0	0	0	0	0	0	0	0	0	0	0	0	0	0	0	0	0	0	0
M02Jul2011	0	0	0	0	0	0	0	0	0	0	0	0	0	0	0	0	0	0	0	2	0	0	0	0	0	0	2	0	0	0	0	0	0	0	0	0	0	0	0	0	0	0	0	0	0	0	0	0	0
M02Jul2011	0	0	0	0	0	0	0	0	0	0	0	0	0	0	0	0	0	0	0	2	0	0	0	0	0	0	1	0	0	0	0	0	0	0	0	0	0	0	0	0	0	0	0	0	0	0	0	0	0
M02Jul2011	0	0	0	0	0	0	0	0	0	0	0	0	0	0	0	0	0	0	0	1	0	0	0	0	0	0	1	0	0	0	0	0	0	0	0	0	0	0	0	0	0	0	0	0	0	0	0	0	0
M03Jul2011	0	0	0	0	0	0	0	0	0	0	0	0	0	0	0	0	0	0	0	0	0	0	0	0	0	0	0	0	0	0	0	0	0	0	0	0	0	0	0	0	0	0	0	0	0	0	0	0	0
M03Jul2011	0	0	0	0	0	0	0	0	0	0	0	0	0	0	0	0	0	0	0	0	0	0	0	0	0	0	0	0	0	0	0	0	0	0	0	0	0	0	0	0	0	0	0	0	0	0	0	0	0
M03Jul2011	0	0	0	0	0	0	0	0	0	0	0	0	0	0	0	0	0	0	0	0	0	0	0	0	0	0	0	0	0	0	0	0	0	0	0	0	0	0	0	0	0	0	0	0	0	0	0	0	0
M04Jul2011	0	0	0	0	0	0	0	0	0	0	0	0	0	0	0	0	0	0	0	0	0	0	0	0	0	0	0	0	0	0	0	0	0	0	0	0	0	0	0	0	0	0	0	0	0	0	0	0	0
M04Jul2011	0	0	0	0	0	0	0	0	0	0	0	0	0	0	0	0	0	0	0	0	0	0	0	0	0	0	0	0	0	0	0	0	0	0	0	0	0	0	0	0	0	0	0	0	0	0	0	0	0
M04Jul2011	0	0	0	0	0	0	0	0	0	0	0	0	0	0	0	0	0	0	0	0	0	0	0	0	0	0	0	0	0	0	0	0	0	0	0	0	0	0	0	0	0	0	0	0	0	0	0	0	0
M05Jul2011	0	0	0	0	0	0	0	0	0	0	0	0	0	0	0	0	0	0	0	0	0	0	0	0	0	0	0	0	0	0	0	0	0	0	0	0	0	0	0	0	0	0	0	0	0	0	0	0	0
M05Jul2011	0	0	0	0	0	0	0	0	0	0	0	0	0	0	0	0	0	0	0	0	0	0	0	0	0	0	0	0	0	0	0	0	0	0	0	0	0	0	0	0	0	0	0	0	0	0	0	0	0
M05Jul2011	0	0	0	0	0	0	0	0	0	0	0	0	0	0	0	0	0	0	0	0	0	0	0	0	0	0	0	0	0	0	0	0	0	0	0	0	0	0	0	0	0	0	0	0	0	0	0	0	0
M06Jul2011	0	0	0	0	0	0	0	0	0	0	0	0	0	0	0	0	0	0	0	0	0	0	0	0	0	0	0	0	0	0	0	0	0	0	0	0	0	0	0	0	0	0	0	0	0	0	0	0	0
M06Jul2011	0	0	0	0	0	0	0	0	0	0	0	0	0	0	0	1	0	0	0	0	0	0	0	0	0	0	0	0	0	0	0	0	0	0	0	0	0	0	0	0	0	0	0	0	0	0	0	0	0
M06Jul2011	0	0	0	0	0	0	0	0	0	0	0	0	0	0	0	1	0	0	0	0	0	0	0	0	0	0	0	0	0	0	0	0	0	0	0	0	0	0	0	0	0	0	0	0	0	0	0	0	0
M07Jul2011	0	0	0	0	0	0	0	0	0	0	0	0	0	0	0	0	0	0	0	0	0	0	0	0	0	0	0	0	0	1	0	0	0	0	0	0	0	0	0	0	0	0	0	0	0	0	0	0	0
M07Jul2011	0	1	0	0	0	0	0	0	0	0	0	0	0	0	0	0	0	0	0	0	0	0	0	0	0	0	0	0	0	1	0	0	0	0	0	0	0	0	0	0	0	0	0	0	0	0	0	0	0
M07Jul2011	0	0	0	0	0	0	0	0	0	0	0	0	0	0	0	0	0	0	0	0	0	0	0	0	0	0	0	0	0	1	0	0	0	0	0	0	0	0	0	0	0	0	0	0	0	0	0	0	0
M08Jul2011	0	0	0	0	0	0	2	0	0	0	3	0	0	0	0	1	0	0	0	0	0	0	0	0	0	0	0	0	0	3	0	0	0	0	0	0	0	0	0	0	0	0	0	0	0	0	0	0	0
M08Jul2011	0	0	0	0	0	0	2	0	0	0	0	0	0	0	0	1	0	0	0	0	0	0	0	0	0	0	0	0	0	1	0	0	0	0	0	0	0	0	0	0	0	0	0	0	0	0	0	0	0
M08Jul2011	0	1	0	0	0	0	4	0	0	0	1	0	0	0	0	0	0	0	0	0	0	0	0	0	0	0	0	0	0	2	0	0	0	0	0	0	0	0	0	0	0	0	0	0	0	0	0	0	0
M09Jul2011	0	0	0	0	0	0	0	0	0	0	0	0	0	0	0	0	0	0	0	0	0	0	0	0	0	0	0	0	0	2	0	0	0	0	0	0	0	0	0	0	0	0	0	0	0	0	0	0	0
M09Jul2011	0	0	0	0	0	0	1	0	0	0	1	0	0	0	0	0	0	0	0	0	0	0	0	0	0	0	0	0	0	2	0	0	0	0	0	0	0	0	0	0	0	0	0	0	0	0	0	0	0
M09Jul2011	0	0	0	0	0	0	0	0	0	0	2	0	0	0	0	0	0	0	0	0	0	0	0	0	0	0	0	0	0	4	0	0	0	0	0	0	0	0	0	0	0	0	0	0	0	0	0	0	0
M10Jul2011	0	0	0	0	0	0	2	0	0	0	2	0	0	0	0	0	0	0	0	0	0	0	0	0	0	0	0	0	0	1	0	0	0	0	0	0	0	0	0	0	0	0	0	0	0	0	0	0	0
M10Jul2011	0	0	0	0	0	0	0	0	0	0	1	0	0	0	0	0	0	0	0	0	0	0	0	0	0	0	0	0	0	2	0	0	0	0	0	0	0	0	0	0	0	2	0	0	0	0	0	0	0
M10Jul2011	0	0	0	0	0	0	2	0	0	0	0	0	0	0	0	0	0	0	0	0	0	0	0	0	0	0	0	0	0	1	0	0	0	0	0	0	0	0	0	0	0	1	0	0	0	0	0	0	0
M11Jul2011	0	0	0	0	0	0	1	0	0	0	0	0	0	0	0	0	0	0	0	0	0	0	0	0	0	0	0	0	0	0	0	0	0	0	0	0	0	0	0	0	0	0	0	0	0	0	0	0	0
M11Jul2011	0	0	0	0	0	0	0	0	0	0	0	0	0	0	0	0	0	0	0	0	0	0	0	0	0	0	0	0	0	0	0	0	0	0	0	0	0	0	0	0	0	0	0	0	0	0	0	0	0
M11Jul2011	0	0	0	0	0	0	3	0	0	0	0	0	0	0	0	0	0	0	0	0	0	0	0	0	0	0	0	0	0	0	0	0	0	0	0	0	0	0	0	0	0	0	0	0	0	0	0	0	0
M12Jul2011	0	0	0	0	0	0	1	0	0	0	0	0	0	0	0	0	0	0	0	0	0	0	0	0	0	0	0	0	0	0	0	0	0	0	0	0	0	0	0	0	0	0	0	0	0	0	0	0	0
M12Jul2011	0	0	0	0	0	0	0	0	0	0	0	0	0	0	0	0	0	0	0	0	0	0	0	0	0	0	0	0	0	1	0	0	0	0	0	0	0	0	0	0	0	0	0	0	0	0	0	0	0
M12Jul2011	0	0	0	0	0	0	0	0	0	0	0	0	0	0	0	0	0	0	0	0	0	0	0	0	0	0	0	0	0	0	0	0	0	0	0	0	0	0	0	0	0	0	0	0	0	0	0	0	0
M13Jul2011	0	0	0	0	0	0	0	0	0	0	0	0	0	0	0	0	0	0	0	0	0	0	0	0	0	0	0	0	0	0	0	0	0	0	0	0	0	0	0	0	0	0	0	0	0	0	0	0	0
M13Jul2011	0	5	0	0	0	0	0	0	0	0	0	0	0	0	0	0	0	0	0	0	0	0	0	0	0	0	0	0	0	1	0	0	0	0	0	0	0	0	0	0	0	0	0	0	0	0	0	0	0
M13Jul2011	0	0	0	0	0	0	0	0	0	0	0	0	0	0	0	0	0	0	0	0	2	0	0	0	0	0	0	0	0	1	0	0	0	0	0	0	0	0	0	0	0	0	0	0	0	0	0	0	0
M14Jul2011	0	0	0	0	0	0	0	0	0	0	0	0	0	0	0	0	0	0	0	0	0	0	0	0	0	0	0	0	0	0	0	0	0	0	0	0	0	0	0	0	0	0	0	0	0	0	0	0	0
M14Jul2011	0	0	0	0	0	0	0	0	0	0	0	0	0	0	0	0	0	0	0	0	0	0	0	0	0	0	0	0	0	0	0	0	0	0	0	0	0	0	0	0	0	0	0	0	0	0	0	0	0
M14Jul2011	0	0	0	0	0	0	0	0	0	0	0	0	0	0	0	0	0	0	0	0	0	0	0	0	0	0	0	0	0	0	0	0	0	0	0	0	0	0	1	0	0	0	0	0	0	0	0	0	0
M01Oct2011	0	0	0	0	0	0	0	0	0	0	0	0	0	0	0	0	0	0	0	0	0	0	0	0	0	0	0	0	0	0	0	0	0	0	0	0	0	0	0	0	0	0	0	0	0	0	0	0	0
M01Oct2011	0	0	0	0	0	0	0	0	0	0	0	0	0	0	0	0	0	0	0	0	0	0	0	0	0	0	0	0	0	0	0	0	0	0	0	0	0	0	0	0	0	0	0	0	0	0	0	0	0
M01Oct2011	0	0	0	0	0	0	0	0	0	0	0	0	0	0	0	0	0	0	0	0	0	0	0	0	0	0	0	0	0	0	0	0	0	0	0	0	0	0	0	0	0	0	0	0	0	0	0	0	0
M02Oct2011	0	0	0	0	0	0	0	0	0	0	0	0	0	0	0	0	0	0	0	0	0	0	0	0	0	0	0	0	0	0	0	0	0	0	0	0	0	0	0	0	0	0	0	0	0	0	0	0	0
M02Oct2011	0	0	0	0	0	0	0	0	0	0	0	0	0	0	0	0	0	0	0	0	1	0	0	0	0	0	0	0	0	0	0	0	0	0	0	0	0	0	0	0	0	0	0	0	0	0	0	0	0
M02Oct2011	0	0	0	0	0	0	0	0	0	0	0	0	0	0	0	0	0	0	0	0	0	0	0	0	0	0	0	0	0	0	0	0	0	0	0	0	0	0	0	0	0	0	0	0	0	0	0	0	0
M03Oct2011	0	0	0	0	0	0	0	0	0	0	0	0	0	0	0	0	0	0	0	0	0	0	0	0	0	0	0	0	0	0	0	0	0	0	0	0	0	0	0	0	0	0	0	0	0	0	0	0	0
M03Oct2011	0	0	0	0	0	0	0	0	0	0	0	0	0	0	0	0	0	0	0	0	0	0	0	0	0	0	0	0	0	0	0	0	0	0	0	0	0	0	0	0	0	0	0	0	0	0	0	0	0
M03Oct2011	0	0	0	0	0	0	0	0	0	0	0	0	0	0	0	0	0	0	0	0	0	0	0	0	0	0	0	0	0	0	0	0	0	0	0	0	0	0	0	0	0	0	0	0	0	0	0	0	0
M04Oct2011	0	0	0	0	0	0	0	0	0	0	0	0	0	0	0	0	0	0	0	0	0	0	0	0	0	0	0	0	0	0	0	0	0	0	0	0	0	0	0	0	0	0	0	0	0	0	0	0	0
M04Oct2011	0	0	0	0	0	0	0	0	0	0	0	0	0	0	0	0	0	0	0	0	0	0	0	0	0	0	0	0	0	0	0	0	0	0	0	0	0	0	0	0	0	0	0	0	0	0	0	0	0
M04Oct2011	0	0	0	0	0	0	0	0	0	0	0	0	0	0	0	0	0	0	0	0	0	0	0	0	0	0	0	0	0	0	0	0	0	0	0	0	0	0	0	0	0	0	0	0	0	0	0	0	0
M05Oct2011	0	0	0	0	0	0	0	0	0	0	0	0	0	0	0	0	0	0	0	0	0	0	0	0	0	0	0	0	0	0	0	0	0	0	0	0	0	0	0	0	0	0	0	0	0	0	0	0	0
M05Oct2011	0	0	0	0	0	0	0	0	0	0	0	0	0	0	0	0	0	0	0	0	0	0	0	0	0	0	0	0	0	0	0	0	0	0	0	0	0	0	0	0	0	0	0	0	0	0	0	0	0
M05Oct2011	0	0	0	0	0	0	0	0	0	0	0	0	0	0	0	0	0	0	0	0	0	0	0	0	0	0	0	0	0	0	0	0	0	0	0	0	0	0	0	0	0	0	0	0	0	0	0	0	0
M06Oct2011	0	0	0	0	0	0	1	0	0	0	0	0	0	0	0	0	0	0	0	0	0	0	0	0	0	0	0	0	0	0	0	0	0	0	0	0	0	0	0	0	0	0	0	0	0	0	0	0	0
M06Oct2011	0	0	0	0	0	0	1	0	0	0	3	0	0	0	0	0	0	0	0	0	0	0	0	0	0	0	0	0	0	0	0	0	0	0	0	0	0	0	0	0	0	0	0	0	0	0	0	0	0
M06Oct2011	0	0	0	0	0	0	0	0	0	0	0	0	0	0	0	0	0	0	0	0	0	0	0	0	0	0	0	0	0	0	0	0	0	0	0	0	0	0	0	0	0	0	0	0	0	0	0	0	0
M07Oct2011	0	0	0	0	0	0	0	0	0	0	0	0	0	0	0	0	0	0	0	0	0	0	0	0	0	0	0	0	0	0	0	0	0	0	0	0	0	0	0	0	0	0	0	0	0	0	0	0	0
M07Oct2011	0	0	0	0	0	0	0	0	0	0	0	0	0	0	0	0	0	0	0	0	0	0	0	0	0	0	0	0	0	0	0	0	0	0	0	0	0	0	0	0	0	0	0	0	0	0	0	0	0
M07Oct2011	0	1	0	0	0	0	1	0	0	0	2	0	0	0	0	0	0	0	0	0	0	0	0	0	0	0	0	0	0	0	0	0	0	0	0	0	0	0	0	0	0	0	0	0	0	0	0	0	0
M09Oct2011	0	0	0	0	0	0	0	0	0	0	0	0	0	0	0	0	0	0	0	0	0	0	0	0	0	0	0	0	0	0	0	0	0	0	0	0	0	0	0	0	0	0	0	0	0	0	0	0	0
M09Oct2011	0	1	0	0	0	0	0	0	0	0	1	0	0	0	0	0	0	0	0	0	0	0	0	0	0	0	0	0	0	0	0	0	0	0	0	0	0	0	0	0	0	0	0	0	0	0	0	0	0
M09Oct2011	0	0	0	0	0	0	4	0	0	0	1	0	0	0	0	0	0	0	0	0	0	0	0	0	0	0	0	0	0	0	0	0	0	0	0	0	0	0	0	0	0	0	0	0	0	0	0	0	0
M10Oct2011	0	0	0	0	0	0	0	0	0	0	0	0	0	0	0	0	0	0	0	0	0	0	0	0	0	0	0	0	0	0	0	0	0	0	0	0	0	0	0	0	0	0	0	0	0	0	0	0	0
M10Oct2011	0	0	0	0	0	0	7	0	0	0	1	0	0	0	0	0	0	0	0	0	0	0	0	0	0	0	0	0	0	1	0	0	0	0	0	0	0	0	0	0	0	0	0	0	0	0	0	0	0
M10Oct2011	0	0	0	0	0	0	0	0	0	0	4	0	0	0	0	0	0	0	0	0	0	0	0	0	0	0	0	0	0	1	0	0	0	0	0	0	0	0	0	0	0	0	0	0	0	0	0	0	0
M11Oct2011	0	0	0	0	0	0	2	0	0	0	0	0	0	0	0	0	0	0	0	0	0	0	0	0	0	0	0	0	0	0	0	0	0	0	0	0	0	0	0	0	0	0	0	0	0	0	0	0	0
M11Oct2011	0	0	0	0	0	0	3	0	0	0	0	0	0	0	0	0	0	0	0	0	0	0	0	0	0	0	0	0	0	0	0	0	0	0	0	0	0	0	0	0	0	0	0	0	0	0	0	0	0
M11Oct2011	0	0	0	0	0	0	0	0	0	0	0	0	0	0	0	0	0	0	0	0	0	0	0	0	0	0	0	0	0	1	0	0	0	0	0	0	0	0	0	0	0	0	0	0	0	0	0	0	0
M12Oct2011	0	0	0	0	0	0	0	0	0	0	0	0	0	0	0	0	0	0	0	0	0	0	0	0	0	0	0	0	0	3	0	0	0	0	0	0	0	0	0	0	0	0	0	0	0	0	0	0	0
M12Oct2011	2	0	0	0	0	0	0	0	0	0	0	0	0	0	0	0	0	0	0	0	0	0	0	0	0	0	0	0	0	4	0	0	0	0	0	0	0	0	1	0	0	0	0	0	0	0	0	0	0
M12Oct2011	3	0	0	0	0	0	2	0	0	0	0	0	0	0	0	0	0	0	0	0	0	0	0	0	0	0	0	0	0	9	0	0	0	0	0	0	0	0	1	0	0	0	0	0	0	0	0	0	0
M13Oct2011	0	0	0	0	0	0	0	0	0	0	0	0	0	0	0	0	0	0	0	0	0	0	0	0	0	0	0	0	0	1	0	0	0	0	0	0	0	0	0	0	0	0	0	0	0	0	0	0	0
M13Oct2011	0	0	0	0	0	0	0	0	0	0	0	0	0	0	0	0	0	0	0	0	0	0	0	0	0	0	0	0	0	0	0	0	0	0	0	0	0	0	0	0	0	0	0	0	0	0	0	0	0
M13Oct2011	0	0	0	0	0	0	0	0	0	0	0	0	0	0	0	0	0	0	0	0	0	0	0	0	0	0	0	0	0	1	0	0	0	0	0	0	0	0	0	0	0	0	0	0	0	0	0	0	0
M14Oct2011	0	0	0	0	0	0	0	0	0	0	0	0	0	0	0	0	0	0	0	0	0	0	0	0	0	0	0	0	0	0	0	0	0	0	0	0	0	0	0	0	0	0	0	0	0	0	0	0	0
M14Oct2011	0	0	0	0	0	0	0	0	0	0	0	0	0	0	0	0	0	0	0	0	0	0	0	0	0	0	0	0	0	0	0	0	0	0	0	0	0	0	0	0	0	0	0	0	0	0	0	0	0
M14Oct2011	0	0	0	0	0	0	0	0	0	0	0	0	0	0	0	0	0	0	0	0	0	0	0	0	0	0	0	0	0	0	0	0	0	0	0	0	0	0	0	0	0	0	0	0	0	0	0	0	0
M01Jan2012	0	0	0	0	0	0	0	0	0	0	0	0	0	0	0	0	0	0	0	0	0	0	0	0	0	0	0	0	0	0	0	0	0	0	0	0	0	0	0	0	0	0	0	0	0	0	0	0	0
M01Jan2012	0	0	0	0	0	0	0	0	0	0	0	0	0	0	0	0	0	0	0	0	0	0	0	0	0	0	0	0	0	0	0	0	0	0	0	0	0	0	0	0	0	0	0	0	0	0	0	0	0
M01Jan2012	0	0	0	0	0	0	0	0	0	0	0	0	0	0	0	0	0	0	0	0	0	0	0	0	0	0	0	0	0	0	0	0	0	0	0	0	0	0	0	0	0	0	0	0	0	0	0	0	0
M02Jan2012	0	0	0	0	0	0	0	0	0	0	0	0	0	0	0	0	0	0	0	0	0	0	0	0	0	0	0	0	0	0	0	0	0	0	0	0	0	0	0	0	0	0	0	0	0	0	0	0	0
M02Jan2012	0	0	0	0	0	0	0	0	0	0	0	0	0	0	0	0	0	0	0	0	0	0	0	0	0	0	0	0	0	0	0	0	0	0	0	0	0	0	0	0	0	0	0	0	0	0	0	0	0
M02Jan2012	0	0	0	0	0	0	0	0	0	0	0	0	0	0	0	0	0	0	0	0	0	0	0	0	0	0	0	0	0	0	0	0	0	0	0	0	0	0	0	0	0	0	0	0	0	0	0	0	0
M04Jan2012	0	0	0	0	0	0	0	0	0	0	0	0	0	0	0	0	0	0	0	0	0	0	0	0	0	0	0	0	0	0	0	0	0	0	0	0	0	0	0	0	0	0	0	0	0	0	0	0	0
M04Jan2012	0	0	0	0	0	0	0	0	0	0	0	0	0	0	0	0	0	0	0	0	0	0	0	0	0	0	0	0	0	0	0	0	0	0	0	0	0	0	0	0	0	0	0	0	0	0	0	0	0
M04Jan2012	0	0	0	0	0	0	0	0	0	0	0	0	0	0	0	0	0	0	0	0	0	0	0	0	0	0	0	0	0	0	0	0	0	0	0	0	0	0	0	0	0	0	0	0	0	0	0	0	0
M05Jan2012	0	0	0	0	0	0	0	0	0	0	0	0	0	0	0	0	0	0	0	0	0	0	0	0	0	0	0	0	0	0	0	0	0	0	0	0	0	0	0	0	0	0	0	0	0	0	0	0	0
M05Jan2012	0	0	0	0	0	0	0	0	0	0	0	0	0	0	0	0	0	0	0	0	0	0	0	0	0	0	0	0	0	0	0	0	0	0	0	0	0	0	0	0	0	0	0	0	0	0	0	0	0
M05Jan2012	0	0	0	0	0	0	0	0	0	0	0	0	0	0	0	0	0	0	0	0	0	0	0	0	0	0	0	0	0	0	0	0	0	0	0	0	0	0	0	0	0	0	0	0	0	0	0	0	0
M06Jan2012	0	0	0	0	0	0	0	0	0	0	0	0	0	0	0	0	0	0	0	0	0	0	0	0	0	0	0	0	0	0	0	0	0	0	0	0	0	0	0	0	0	0	0	0	0	0	0	0	0
M06Jan2012	0	0	0	0	0	0	0	0	0	0	0	0	0	0	0	0	0	0	0	0	0	0	0	0	0	0	0	0	0	0	0	0	0	0	0	0	0	0	0	0	0	0	0	0	0	0	0	0	0
M06Jan2012	0	0	0	0	0	0	0	0	0	0	0	0	0	0	0	0	0	0	0	0	0	0	0	0	0	0	0	0	0	0	0	0	0	0	0	0	0	0	0	0	0	0	0	0	0	0	0	0	0
M07Jan2012	0	1	0	0	0	0	0	0	0	0	1	0	0	0	0	0	0	0	0	0	0	0	0	0	0	0	0	0	0	0	0	0	0	0	0	0	0	0	0	0	0	0	0	0	0	0	0	0	0
M07Jan2012	0	0	0	0	0	0	0	0	0	0	0	0	0	0	0	0	0	0	0	0	0	0	0	0	0	0	0	0	0	0	0	0	0	0	0	0	0	0	0	0	0	0	0	0	0	0	0	0	0
M07Jan2012	0	1	0	0	0	0	0	0	0	0	0	0	0	0	0	0	0	0	0	0	0	0	0	0	0	0	0	0	0	0	0	0	0	0	0	0	0	0	2	0	0	0	0	0	0	0	0	0	0
M09Jan2012	0	0	0	0	0	0	2	0	0	0	0	0	0	0	0	0	0	0	0	0	0	0	0	0	0	0	0	0	0	0	0	0	0	0	0	0	0	0	0	0	0	0	0	0	0	0	0	0	0
M09Jan2012	0	0	0	0	0	0	0	0	0	0	0	0	0	0	0	0	0	0	0	0	0	0	0	0	0	0	0	0	0	0	0	0	0	0	0	0	0	0	0	0	0	0	0	0	0	0	0	0	0
M09Jan2012	0	0	0	0	0	0	0	0	0	0	0	0	0	0	0	0	0	0	0	0	0	0	0	0	0	0	0	0	0	0	0	0	0	0	0	0	0	0	0	0	0	0	0	0	0	0	0	0	0
M10Jan2012	0	0	0	0	0	0	4	0	0	0	1	0	0	0	0	0	0	0	0	0	0	0	0	0	0	0	0	0	0	1	0	0	0	0	0	0	0	0	0	0	0	0	0	0	0	0	0	0	0
M10Jan2012	0	0	0	0	0	0	1	0	0	0	0	0	0	0	0	0	0	0	0	0	0	0	0	0	0	0	0	0	0	0	0	0	0	0	0	0	0	0	0	0	0	0	0	0	0	0	0	0	0
M10Jan2012	0	0	0	0	0	0	7	0	0	0	5	0	0	0	0	0	0	0	0	0	0	0	0	0	0	0	0	0	0	2	0	0	0	0	0	0	0	0	0	0	0	0	0	0	0	0	0	0	0
M11Jan2012	0	0	0	0	0	0	1	0	0	0	0	0	0	0	0	0	0	0	0	0	0	0	0	0	0	0	0	0	0	1	0	0	0	0	0	0	0	0	0	0	0	0	0	0	0	0	0	0	0
M11Jan2012	0	0	0	0	0	0	2	0	0	0	0	0	0	0	0	0	0	0	0	0	0	0	0	0	0	0	0	0	0	0	0	0	0	0	0	0	0	0	0	0	0	0	0	0	0	0	0	0	0
M11Jan2012	0	0	0	0	0	0	0	0	0	0	0	0	0	0	0	0	0	0	0	0	0	0	0	0	0	0	0	0	0	0	0	0	0	0	0	0	0	0	0	0	0	0	0	0	0	0	0	0	0
M12Jan2012	0	0	0	0	0	0	0	0	0	0	1	0	0	0	0	0	0	0	0	0	0	0	0	0	0	0	0	0	0	1	0	0	0	0	0	0	0	0	2	0	0	0	0	0	0	0	0	0	0
M12Jan2012	0	0	0	0	0	0	0	0	0	0	0	0	0	0	0	0	0	0	0	0	0	0	0	0	0	0	0	0	0	1	0	0	0	0	0	0	0	0	3	0	0	0	0	0	0	0	0	0	0
M12Jan2012	0	0	0	0	0	0	0	0	0	0	0	0	0	0	0	0	0	0	0	0	0	0	0	0	0	0	0	0	0	0	0	0	0	0	0	0	0	0	0	0	0	0	0	0	0	0	0	0	0
M13Jan2012	0	0	0	0	0	0	0	0	0	0	0	0	0	0	0	0	0	0	0	0	0	0	0	0	0	0	0	0	0	0	0	0	0	0	0	0	0	0	0	0	0	0	0	0	0	0	0	0	0
M13Jan2012	0	0	0	0	0	0	0	0	0	0	0	0	0	0	0	0	0	0	0	0	0	0	0	0	0	0	0	0	0	0	0	0	0	0	0	0	0	0	0	0	0	0	0	0	0	0	0	0	0
M13Jan2012	0	0	0	0	0	0	0	0	0	0	1	0	0	0	0	0	0	0	0	0	0	0	0	0	0	0	0	0	0	0	0	0	0	0	0	0	0	0	0	0	0	0	0	0	0	0	0	0	0
M14Jan2012	0	0	0	0	0	0	0	0	0	0	0	0	0	0	0	0	0	0	0	0	0	0	0	0	0	0	0	0	0	0	0	0	0	0	0	0	0	0	0	0	0	0	0	0	0	0	0	0	0
M14Jan2012	0	0	0	0	0	0	0	0	0	0	0	0	0	0	0	0	0	0	0	0	0	0	0	0	0	0	0	0	0	0	0	0	0	0	0	0	0	0	0	0	0	0	0	0	0	0	0	0	0
M14Jan2012	0	0	0	0	0	0	0	0	0	0	0	0	0	0	0	0	0	0	0	0	0	0	0	0	0	0	0	0	0	0	0	0	0	0	0	0	0	0	0	0	0	0	0	0	0	0	0	0	0
M15Jan2012	0	0	0	0	0	0	0	0	0	0	0	0	0	0	0	0	0	0	0	0	0	0	0	0	0	0	0	0	0	0	0	0	0	0	0	0	0	0	0	0	0	0	0	0	0	0	0	0	0
M15Jan2012	0	0	0	0	0	0	0	0	0	0	0	0	0	0	0	0	0	0	0	0	0	0	0	0	0	0	0	0	0	0	0	0	0	0	0	0	0	0	0	0	0	0	0	0	0	0	0	0	0
M15Jan2012	0	0	0	0	0	0	0	0	0	0	0	0	0	0	0	0	0	0	0	0	0	0	0	0	0	0	0	0	0	0	0	0	0	0	0	0	0	0	0	0	0	0	0	0	0	0	0	0	0
M01Apr2012	0	0	0	0	0	0	0	0	0	0	0	0	0	0	0	0	0	0	0	0	0	0	0	0	0	0	0	0	0	0	0	0	0	0	0	0	0	0	0	0	0	0	0	0	0	0	0	0	0
M01Apr2012	0	0	0	0	0	0	0	0	0	0	0	0	0	0	0	0	0	0	0	0	0	0	0	0	0	0	0	0	0	0	0	0	0	0	0	0	0	0	0	0	0	0	0	0	0	0	0	0	0
M01Apr2012	0	0	0	0	0	0	0	0	0	0	0	0	0	0	0	0	0	0	0	0	0	0	0	0	0	0	0	0	0	0	0	0	0	0	0	0	0	0	0	0	0	0	0	0	0	0	0	0	0
M02Apr2012	0	0	0	0	0	0	0	0	0	0	0	0	0	0	0	0	0	0	0	0	0	0	0	0	0	0	0	0	0	0	0	0	0	0	0	0	0	0	2	0	0	0	0	0	0	0	0	0	0
M02Apr2012	0	0	0	0	0	0	0	0	0	0	0	0	0	0	0	0	0	0	0	0	0	0	0	0	0	0	0	0	0	0	0	0	0	0	0	0	0	0	0	0	0	0	0	0	0	0	0	0	0
M02Apr2012	0	0	0	0	0	0	0	0	0	0	0	0	0	0	0	0	0	0	0	0	0	0	0	0	0	0	6	0	0	0	0	0	0	0	0	0	0	0	2	0	0	0	0	0	0	0	0	0	0
M03Apr2012	0	0	0	0	0	0	0	0	0	0	0	0	0	0	0	0	0	0	0	0	0	0	0	0	0	0	0	0	0	0	0	0	0	0	0	0	0	0	0	0	0	0	0	0	0	0	0	0	0
M03Apr2012	0	0	0	0	0	0	0	0	0	0	0	0	0	0	0	0	0	0	0	0	0	0	0	0	0	0	0	0	0	0	0	0	0	0	0	0	0	0	0	0	0	0	0	0	0	0	0	0	0
M03Apr2012	0	0	0	0	0	0	0	0	0	0	0	0	0	0	0	0	0	0	0	0	0	0	0	0	0	0	0	0	0	0	0	0	0	0	0	0	0	0	0	0	0	0	0	0	0	0	0	0	0
M04Apr2012	0	0	0	0	0	0	0	0	0	0	0	0	0	0	0	0	0	0	0	0	0	0	0	0	0	0	0	0	0	0	0	0	0	0	0	0	0	0	0	0	0	0	0	0	0	0	0	0	0
M04Apr2012	0	0	0	0	0	0	0	0	0	0	0	0	0	0	0	0	0	0	0	0	0	0	0	0	0	0	0	0	0	0	0	0	0	0	0	0	0	0	0	0	0	0	0	0	0	0	0	0	0
M04Apr2012	0	0	0	0	0	0	0	0	0	0	0	0	0	0	0	0	0	0	0	0	0	0	0	0	0	0	0	0	0	0	0	0	0	0	0	0	0	0	0	0	0	0	0	0	0	0	0	0	0
M05Apr2012	0	0	0	0	0	0	0	0	0	0	0	0	0	0	0	0	0	0	0	0	0	0	0	0	0	0	0	0	0	0	0	0	0	0	0	0	0	0	0	0	0	0	0	0	0	0	0	0	0
M05Apr2012	0	0	0	0	0	0	0	0	0	0	0	0	0	0	0	0	0	0	0	0	0	0	0	0	0	0	0	0	0	0	0	0	0	0	0	0	0	0	0	0	0	0	0	0	0	0	0	0	0
M05Apr2012	0	0	0	0	0	0	0	0	0	0	0	0	0	0	0	0	0	0	0	0	0	0	0	0	0	0	0	0	0	0	0	0	0	0	0	0	0	0	0	0	0	0	0	0	0	0	0	0	0
M06Apr2012	0	0	0	0	0	0	0	0	0	0	0	0	0	0	0	0	0	0	0	0	0	0	0	0	0	0	0	0	0	0	0	0	0	0	0	0	0	0	0	0	0	0	0	0	0	0	0	0	0
M06Apr2012	0	0	0	0	0	0	0	0	0	0	0	0	0	0	0	0	0	0	0	0	0	0	0	0	0	0	0	0	0	0	0	0	0	0	0	0	0	0	0	0	0	0	0	0	0	0	0	0	0
M06Apr2012	0	0	0	0	0	0	0	0	0	0	0	0	0	0	0	0	0	0	0	0	0	0	0	0	0	0	0	0	0	0	0	0	0	0	0	0	0	0	0	0	0	0	0	0	0	0	0	0	0
M07Apr2012	0	1	0	0	0	0	0	0	0	0	0	0	0	0	0	0	0	0	0	0	0	0	0	0	0	0	0	0	0	1	0	0	0	0	0	0	0	0	0	0	0	0	0	0	0	0	0	0	0
M07Apr2012	0	0	0	0	0	0	0	0	0	0	0	0	0	0	0	0	0	0	0	0	0	0	0	0	0	0	0	0	0	0	0	0	0	0	0	0	0	0	2	0	0	0	0	0	0	0	0	0	0
M07Apr2012	0	0	0	0	0	0	0	0	0	0	0	0	0	0	0	0	0	0	0	0	0	0	0	0	0	0	0	0	0	0	0	0	0	0	0	0	0	0	0	0	0	0	0	0	0	0	0	0	0
M08Apr2012	0	0	0	0	0	0	0	0	0	0	0	0	0	0	0	0	0	0	0	0	0	0	0	0	0	0	0	0	0	1	0	0	0	0	0	0	0	0	0	0	0	0	0	0	0	0	0	0	0
M08Apr2012	1	0	0	0	0	0	0	0	0	0	0	0	0	0	0	0	0	0	0	0	0	0	0	0	0	0	0	0	0	0	0	0	0	0	0	0	0	0	0	0	0	0	0	0	0	0	0	0	0
M08Apr2012	0	0	0	0	0	0	0	0	0	0	0	0	0	0	0	0	0	0	0	0	0	0	0	0	0	0	0	0	0	0	0	0	0	0	0	0	0	0	0	0	0	0	0	0	0	0	0	0	0
M09Apr2012	1	0	0	0	0	0	0	0	0	0	0	0	0	0	0	1	0	0	0	0	0	0	0	0	0	0	0	0	0	1	0	0	0	0	0	0	0	0	1	0	0	0	0	0	0	0	0	0	0
M09Apr2012	0	0	0	0	1	0	0	0	0	0	0	0	0	0	0	0	0	0	0	0	0	0	0	0	0	0	0	0	0	1	0	0	0	0	0	0	0	0	0	0	0	0	0	0	0	0	0	0	0
M09Apr2012	1	0	0	0	0	0	0	0	0	0	0	0	0	0	0	0	0	0	0	0	0	0	0	0	0	0	0	0	0	0	0	0	0	0	0	0	0	0	0	0	0	0	0	0	0	0	0	0	0
M10Apr2012	0	0	0	0	0	0	3	0	0	0	0	0	0	0	0	0	0	0	0	0	0	0	0	0	0	0	0	0	0	1	0	0	0	0	0	0	0	0	0	0	0	0	0	0	0	0	0	0	0
M10Apr2012	0	0	0	0	0	0	1	0	0	0	0	0	0	0	0	0	0	0	0	0	0	0	0	0	0	0	0	0	1	1	0	0	0	0	0	0	0	0	0	0	0	0	0	0	0	0	0	0	0
M10Apr2012	0	0	0	0	0	0	5	0	0	0	0	0	0	0	0	0	0	0	0	0	0	0	0	0	0	0	0	0	0	2	0	0	0	0	0	0	0	0	0	0	0	0	0	0	0	0	0	0	0
M11Apr2012	0	0	0	0	0	0	0	0	0	0	2	0	0	0	0	0	0	0	0	0	0	0	0	0	0	0	0	0	0	1	0	0	0	0	0	0	0	0	0	0	0	0	0	0	0	0	0	0	0
M11Apr2012	0	0	0	0	0	0	0	0	0	0	2	0	0	0	0	0	0	0	0	0	0	0	0	0	0	0	0	1	0	1	0	0	0	0	0	0	0	0	1	0	0	0	0	0	0	0	0	0	0
M11Apr2012	0	0	0	0	0	0	4	0	0	0	0	0	0	0	0	0	0	0	0	0	0	0	0	0	0	0	0	0	0	0	0	0	0	0	0	0	0	0	0	0	0	0	0	0	0	0	0	0	0
M12Apr2012	0	0	0	0	0	0	0	0	0	0	0	0	0	0	0	0	0	0	0	0	0	0	0	0	0	0	0	0	0	0	0	0	0	0	0	0	0	0	0	0	0	0	0	0	0	0	0	0	0
M12Apr2012	0	0	0	0	0	0	0	0	0	0	0	0	0	0	0	0	0	0	0	0	0	0	0	0	0	0	0	0	0	0	0	0	0	0	0	0	0	0	1	0	0	0	0	0	0	0	0	0	0
M12Apr2012	0	0	0	0	0	0	2	0	0	0	0	0	0	0	0	0	0	0	0	0	0	0	0	0	0	0	0	0	0	1	0	0	0	0	0	0	0	0	1	0	0	0	0	0	0	0	0	0	0
M13Apr2012	0	0	0	0	0	0	0	0	0	0	0	0	0	0	0	0	0	0	0	0	0	0	0	0	0	0	0	0	0	0	0	0	0	0	0	0	0	0	0	0	0	0	0	0	0	0	0	0	0
M13Apr2012	0	0	0	0	0	0	0	0	0	0	0	0	0	0	0	0	0	0	0	0	0	0	0	0	0	0	0	0	0	2	0	0	0	0	0	0	0	0	1	0	0	0	0	0	0	0	0	0	0
M13Apr2012	0	2	0	0	0	0	1	0	0	0	0	0	0	0	0	0	0	0	0	0	0	0	0	0	0	0	0	0	0	0	0	0	0	0	0	0	0	0	4	0	0	0	0	0	0	0	0	0	0
M14Apr2012	0	0	0	0	0	0	0	0	0	0	0	0	0	0	0	0	0	0	0	0	0	0	0	0	0	0	0	0	0	0	0	0	0	0	0	0	0	0	0	0	0	0	0	0	0	0	0	0	0
M14Apr2012	0	0	0	0	0	0	0	0	0	0	0	0	0	0	0	0	0	0	0	0	0	0	0	0	0	0	0	0	0	0	0	0	0	0	0	0	0	0	0	0	0	0	0	0	0	0	0	0	0
M14Apr2012	0	0	0	0	0	0	0	0	0	0	0	0	0	0	0	0	0	0	0	0	0	0	0	0	0	0	0	0	0	0	0	0	0	0	0	0	0	0	0	0	0	0	0	0	0	0	0	0	0
M07Oct2012	0	0	0	0	0	0	0	0	0	0	0	0	0	0	0	0	0	0	0	0	0	0	0	0	0	0	0	0	0	1	0	0	0	0	0	0	0	0	0	0	0	0	0	0	0	0	0	0	0
M07Oct2012	0	0	0	0	0	0	0	0	0	0	0	0	0	0	0	0	0	0	0	0	0	0	0	0	0	0	0	0	0	0	0	0	0	0	0	0	0	0	0	0	0	0	0	0	0	0	0	0	0
M07Oct2012	0	0	0	0	0	0	0	0	0	0	0	0	0	0	0	0	0	0	0	0	0	0	0	0	0	0	0	0	0	0	0	0	0	0	0	0	0	0	0	0	0	0	0	0	0	0	0	0	0
M08Oct2012	3	0	0	0	0	0	0	0	0	0	0	0	0	0	0	0	0	0	0	0	0	0	0	0	0	0	0	0	0	1	0	0	0	0	0	4	0	0	0	0	0	0	0	0	0	0	0	0	0
M08Oct2012	0	0	0	0	0	0	0	0	0	0	0	0	0	0	0	0	0	0	0	0	0	0	0	0	0	0	0	0	0	1	0	0	0	0	0	0	0	0	0	0	0	0	0	0	0	0	0	0	0
M08Oct2012	0	0	0	0	0	0	0	0	0	0	0	0	0	0	0	0	0	0	0	0	0	0	0	0	0	0	0	0	0	1	0	0	0	0	0	1	0	0	0	0	0	0	0	0	0	0	0	0	0
M09Oct2012	0	2	0	0	0	0	0	0	0	0	0	0	0	0	0	0	0	0	0	0	0	0	0	0	0	0	0	0	0	1	0	0	0	0	0	0	0	0	1	0	0	0	0	0	0	0	0	2	0
M09Oct2012	0	0	0	0	0	0	0	0	0	0	1	0	0	0	0	0	0	0	0	0	0	0	0	0	0	0	0	0	0	1	0	0	0	0	0	0	0	0	0	0	0	0	0	0	0	0	0	0	0
M09Oct2012	0	2	0	0	0	0	3	0	0	0	0	0	0	0	0	0	0	0	0	0	0	0	0	0	0	0	0	0	0	1	0	0	0	0	0	0	0	0	0	0	0	0	0	0	0	0	0	0	0
M01Jan2013	0	0	0	0	0	0	0	0	0	0	0	0	0	0	0	0	0	0	0	0	0	0	0	0	0	0	0	0	0	0	0	0	0	0	0	0	0	0	0	0	0	0	0	0	0	0	0	0	0
M01Jan2013	0	0	0	0	0	0	0	0	0	0	0	0	0	0	0	0	0	0	0	0	0	0	0	0	0	0	0	0	0	0	0	0	0	0	0	0	0	0	0	0	0	0	0	0	0	0	0	0	0
M01Jan2013	0	0	0	0	0	0	0	0	0	0	0	0	0	0	0	0	0	0	0	0	0	0	0	0	0	0	0	0	0	0	0	0	0	0	0	0	0	0	0	0	0	0	0	0	0	0	0	0	0
M02Jan2013	0	0	0	0	0	0	0	0	0	0	0	0	0	0	0	0	0	0	0	0	0	0	0	0	0	0	0	0	0	0	0	0	0	0	0	0	0	0	0	0	0	0	0	0	0	0	0	0	0
M02Jan2013	0	0	0	0	0	0	0	0	0	0	0	0	0	0	0	0	0	0	0	0	0	0	0	0	0	0	0	0	0	0	0	0	0	0	0	0	0	0	1	0	0	0	0	0	0	0	0	0	0
M02Jan2013	0	0	0	0	0	0	0	0	0	0	0	0	0	0	0	0	0	0	0	0	0	0	0	0	0	0	0	0	0	0	0	0	0	0	0	0	0	0	1	0	0	0	0	0	0	0	0	0	0
M03Jan2013	0	0	0	0	0	0	0	0	0	0	0	0	0	0	0	0	0	0	0	0	0	0	0	0	0	0	0	0	0	0	0	0	0	0	0	0	0	0	0	0	0	0	0	0	0	0	0	0	0
M03Jan2013	0	0	0	0	0	0	0	0	0	0	0	0	0	0	0	0	0	0	0	0	0	0	0	0	0	0	0	0	0	0	0	0	0	0	0	0	0	0	0	0	0	0	0	0	0	0	0	0	0
M03Jan2013	0	0	0	0	0	0	0	0	0	0	0	0	0	0	0	0	0	0	0	0	0	0	0	0	0	0	0	0	0	0	0	0	0	0	0	0	0	0	0	0	0	0	0	0	0	0	0	0	0
M04Jan2013	0	0	0	0	0	0	0	0	0	0	0	0	0	0	0	0	0	0	0	0	0	0	0	0	0	0	0	0	0	0	0	0	0	0	0	0	0	0	0	0	0	0	0	0	0	0	0	0	0
M04Jan2013	0	0	0	0	0	0	0	0	0	0	0	0	0	0	0	0	0	0	0	0	0	0	0	0	0	0	0	0	0	0	0	0	0	0	0	0	0	0	0	0	0	0	0	0	0	0	0	0	0
M04Jan2013	0	0	0	0	0	0	0	0	0	0	0	0	0	0	0	0	0	0	0	0	0	0	0	0	0	0	0	0	0	0	0	0	0	0	0	0	0	0	0	0	0	0	0	0	0	0	0	0	0
M06Jan2013	0	0	0	0	0	0	0	0	0	0	0	0	0	0	0	0	0	0	0	0	0	0	0	0	0	0	0	0	0	0	0	0	0	0	0	0	0	0	0	0	0	0	0	0	0	0	0	0	0
M06Jan2013	0	0	0	0	0	0	0	0	0	0	0	0	0	0	0	0	0	0	0	0	0	0	0	0	0	0	0	0	0	0	0	0	0	0	0	0	0	0	0	0	0	0	0	0	0	0	0	0	0
M06Jan2013	0	0	0	0	0	0	1	0	0	0	0	0	0	0	0	0	0	0	0	0	0	0	0	0	0	0	0	0	0	0	0	0	0	0	0	0	0	0	0	0	0	0	0	0	0	0	0	0	0
M07Jan2013	0	2	0	0	0	0	0	0	0	0	0	0	0	0	0	0	0	0	0	0	0	0	0	0	0	0	0	0	0	0	0	0	0	0	0	0	0	0	0	0	0	0	0	0	0	0	0	0	0
M07Jan2013	0	1	0	0	0	0	0	0	0	0	0	0	0	0	0	0	0	0	0	0	0	0	0	0	0	0	0	0	0	0	0	0	0	0	0	0	0	0	1	0	0	0	0	0	0	0	0	0	0
M07Jan2013	0	2	0	0	0	0	0	0	0	0	0	0	0	0	0	2	0	0	0	0	0	0	0	0	0	0	0	0	0	0	0	0	0	0	0	0	0	0	1	0	0	0	0	0	0	0	0	0	0
M08Jan2013	0	0	0	0	0	0	5	0	0	0	1	0	0	0	0	1	0	0	0	0	0	0	0	0	0	0	0	0	0	1	0	0	0	0	0	0	0	0	1	0	0	0	0	0	0	0	0	0	0
M08Jan2013	0	1	0	0	0	0	1	0	0	0	0	0	0	0	0	0	0	0	0	0	0	0	0	0	0	0	0	0	0	1	0	0	0	0	0	0	0	0	0	0	0	0	0	0	0	0	0	0	0
M08Jan2013	0	2	0	0	0	0	0	0	0	0	1	0	0	0	0	0	0	0	0	0	0	0	0	0	0	0	0	0	0	0	0	0	0	0	0	0	0	0	0	0	0	0	0	0	0	0	0	0	0
M09Jan2013	0	5	0	0	0	0	0	0	0	0	1	0	0	0	0	0	0	0	0	0	0	0	0	0	0	0	0	0	0	0	0	0	0	0	0	0	0	0	0	0	0	0	0	0	0	0	0	0	0
M09Jan2013	0	0	0	0	0	0	1	0	0	0	1	0	0	0	0	0	0	0	0	0	0	0	0	0	0	0	0	0	0	3	0	0	0	0	0	0	0	0	0	0	0	0	0	0	0	0	0	0	0
M09Jan2013	0	2	0	0	0	0	0	0	0	0	0	0	0	0	0	0	0	0	0	0	0	0	0	0	0	0	0	0	0	0	0	0	0	0	0	0	0	0	0	0	0	0	0	0	0	0	0	0	0
M10Jan2013	0	1	0	0	0	0	0	0	0	0	0	0	0	0	0	0	0	0	0	0	0	0	0	0	0	0	0	1	0	1	0	0	0	0	0	0	0	0	0	0	0	0	0	0	0	0	0	0	0
M10Jan2013	0	0	0	0	0	0	3	0	0	0	0	0	0	0	0	0	0	0	0	0	0	0	0	0	0	0	0	0	0	1	0	0	0	0	0	0	0	0	0	0	0	0	0	0	0	0	0	0	0
M10Jan2013	0	0	0	0	0	0	0	0	0	0	0	0	0	0	0	0	0	0	0	0	0	0	0	0	0	0	0	0	0	5	0	0	0	0	0	0	0	0	0	0	0	0	0	0	0	0	0	0	0
M11Jan2013	0	0	0	0	0	0	0	0	0	0	0	0	0	0	0	0	0	0	0	0	0	0	0	0	0	0	0	0	0	3	0	0	0	0	0	0	0	0	0	0	0	0	0	0	0	0	0	0	0
M11Jan2013	0	0	0	0	0	0	0	0	0	0	1	0	0	0	0	1	0	0	0	0	0	0	0	0	0	0	0	0	0	27	0	0	0	0	0	0	0	0	0	0	0	0	0	0	0	0	0	0	0
M11Jan2013	0	0	0	0	0	0	0	0	0	0	0	0	0	0	0	0	0	0	0	0	0	0	0	0	0	0	0	0	0	10	0	0	0	0	0	0	0	0	0	0	0	0	0	0	0	0	0	0	0
M12Jan2013	0	0	0	0	0	0	1	0	0	0	0	0	0	0	0	0	0	0	0	0	0	0	0	0	0	0	0	0	0	8	0	0	0	0	0	0	0	0	1	0	0	0	0	0	0	0	0	0	0
M12Jan2013	0	0	0	0	0	0	5	0	0	0	1	0	0	0	0	0	0	0	0	0	0	0	0	0	0	0	0	0	0	4	0	0	0	0	0	0	0	0	0	0	0	0	0	0	0	0	0	0	0
M12Jan2013	0	0	0	0	0	0	0	0	0	0	2	0	0	0	0	0	0	0	0	0	0	0	0	0	0	0	0	0	0	2	0	0	0	0	0	0	0	0	0	0	0	0	0	0	0	0	0	0	0
M13Jan2013	0	1	0	0	0	0	0	0	0	0	0	0	0	0	0	6	0	0	0	2	0	0	0	0	0	0	0	0	0	1	0	0	0	0	0	0	0	0	0	0	0	0	0	0	0	0	0	0	0
M13Jan2013	0	0	0	0	0	0	1	0	0	0	0	0	0	0	0	3	0	0	0	1	0	0	0	0	0	0	0	0	0	0	0	0	0	0	0	0	0	0	0	0	0	0	0	0	0	0	0	0	0
M13Jan2013	0	0	0	0	0	0	0	0	0	0	0	0	0	0	0	0	0	0	0	1	0	0	0	0	0	1	0	0	0	1	0	0	0	1	0	0	0	0	0	0	0	0	0	0	0	0	0	0	0
M14Jan2013	0	0	0	0	0	0	0	0	0	0	0	0	0	0	0	0	0	0	0	0	0	0	0	0	0	0	0	0	0	0	0	0	0	0	0	0	0	0	0	0	0	0	0	0	0	0	0	0	0
M14Jan2013	0	0	0	0	0	0	0	0	0	0	0	0	0	0	0	0	0	0	0	0	0	0	0	0	0	0	0	0	0	0	0	0	0	0	0	0	0	0	0	0	0	0	0	0	0	0	0	0	0
M14Jan2013	0	0	0	0	0	0	0	0	0	0	0	0	0	0	0	0	0	0	0	0	0	0	0	0	0	0	0	0	0	0	0	0	0	0	0	0	0	0	0	0	0	0	0	0	0	0	0	0	0
M15Jan2013	0	0	0	0	0	0	0	0	0	0	0	0	0	0	0	0	0	0	0	0	0	0	0	0	0	0	0	0	0	0	0	0	0	0	0	0	0	0	0	0	0	0	0	0	0	0	0	0	0
M15Jan2013	0	0	0	0	0	0	0	0	0	0	0	0	0	0	0	0	0	0	0	0	0	0	0	0	0	0	0	0	0	0	0	0	0	0	0	0	0	0	0	0	0	0	0	0	0	0	0	0	0
M15Jan2013	0	0	0	0	0	0	0	0	0	0	0	0	0	0	0	0	0	0	0	0	0	0	0	0	0	0	0	0	0	0	0	0	0	0	0	0	0	0	0	0	0	0	0	0	0	0	0	0	0
M01Apr2013	0	0	0	0	0	0	0	0	0	0	0	0	0	0	0	0	0	0	0	0	0	0	0	0	0	0	0	0	0	0	0	0	0	0	0	0	0	0	0	0	0	0	0	0	0	0	0	0	0
M01Apr2013	0	0	0	0	0	0	0	0	0	0	0	0	0	0	0	0	0	0	0	0	0	0	0	0	0	0	0	0	0	0	0	0	0	0	0	0	0	0	0	0	0	0	0	0	0	0	0	0	0
M01Apr2013	0	0	0	0	0	0	0	0	0	0	0	0	0	0	0	0	0	0	0	0	0	0	0	0	0	0	0	0	0	0	0	0	0	0	0	0	0	0	0	0	0	0	0	0	0	0	0	0	0
M02Apr2013	0	0	0	0	0	0	0	0	0	0	0	0	0	0	0	0	0	0	0	0	0	0	0	0	0	0	0	0	0	0	0	0	0	0	0	0	0	0	1	0	0	0	0	0	0	0	0	0	0
M02Apr2013	0	0	0	0	0	0	0	0	0	0	0	0	0	0	0	0	0	0	0	0	0	0	0	0	0	0	0	0	0	0	0	0	0	0	0	0	0	0	1	0	0	0	0	0	0	0	0	0	0
M02Apr2013	0	0	0	0	0	0	0	0	0	0	0	0	0	0	0	0	0	0	0	0	0	0	0	0	0	0	0	0	0	0	0	0	0	0	0	0	0	0	0	0	0	0	0	0	0	0	0	0	0
M03Apr2013	0	0	0	0	0	0	0	0	0	0	0	0	0	0	0	0	0	0	0	0	0	0	0	0	0	0	0	0	0	0	0	0	0	0	0	0	0	0	0	0	0	0	0	0	0	0	0	0	0
M03Apr2013	0	0	0	0	0	0	0	0	0	0	0	0	0	0	0	0	0	0	0	0	0	0	0	0	0	0	0	0	0	0	0	0	0	0	0	0	0	0	0	0	0	0	0	0	0	0	0	0	0
M03Apr2013	0	0	0	0	0	0	0	0	0	0	0	0	0	0	0	0	0	0	0	0	0	0	0	0	0	0	0	0	0	0	0	0	0	0	0	0	0	0	0	0	0	0	0	0	0	0	0	0	0
M04Apr2013	0	0	0	0	0	0	0	0	0	0	0	0	0	0	0	0	0	0	0	0	0	0	0	0	0	0	0	0	0	0	0	0	0	0	0	0	0	0	0	0	0	0	0	0	0	0	0	0	0
M04Apr2013	0	0	0	0	0	0	0	0	0	0	0	0	0	0	0	0	0	0	0	0	0	0	0	0	0	0	0	0	0	0	0	0	0	0	0	0	0	0	0	0	0	0	0	0	0	0	0	0	0
M04Apr2013	0	0	0	0	0	0	0	0	0	0	0	0	0	0	0	0	0	0	0	0	0	0	0	0	0	0	0	0	0	0	0	0	0	0	0	0	0	0	0	0	0	0	0	0	0	0	0	0	0
M06Apr2013	0	0	0	0	0	0	0	0	0	0	0	0	0	0	0	0	0	0	0	0	0	0	0	0	0	0	0	0	0	0	0	0	0	0	0	0	0	0	0	0	0	0	0	0	0	0	0	0	0
M06Apr2013	0	0	0	0	0	0	0	0	0	0	0	0	0	0	0	0	0	0	0	0	0	0	0	0	0	0	0	0	0	0	0	0	0	0	0	0	0	0	0	0	0	0	0	0	0	0	0	0	0
M06Apr2013	0	0	0	0	0	0	0	0	0	0	0	0	0	0	0	0	0	0	0	0	0	0	0	0	0	0	0	0	0	0	0	0	0	0	0	0	0	0	0	0	0	0	0	0	0	0	0	0	0
M07Apr2013	0	0	0	0	0	0	0	0	0	0	1	0	0	0	0	0	0	0	0	0	0	0	0	0	0	0	0	0	0	0	0	0	0	0	0	0	0	0	0	0	0	0	0	0	0	0	0	0	0
M07Apr2013	0	0	0	0	0	0	2	0	0	0	0	0	0	0	0	0	0	0	0	0	0	0	0	0	0	0	0	0	0	1	0	0	0	0	0	0	0	0	0	0	0	0	0	0	0	0	0	0	0
M07Apr2013	0	0	0	0	0	0	0	0	0	0	0	0	0	0	0	0	0	0	0	0	0	0	0	0	0	0	0	0	0	0	0	0	0	0	0	0	0	0	0	0	0	0	0	0	0	0	0	0	0
M08Apr2013	0	0	0	0	0	0	0	0	0	0	0	0	0	0	0	0	0	0	0	0	0	0	0	0	0	0	0	0	0	1	0	0	0	0	0	0	0	0	0	0	0	0	0	0	0	0	0	0	0
M08Apr2013	0	0	0	0	0	0	1	0	0	0	1	0	0	0	0	0	0	0	0	0	0	0	0	0	0	0	0	0	0	0	0	0	0	0	0	0	0	0	0	0	0	0	0	0	0	0	0	0	0
M08Apr2013	0	0	0	0	0	0	0	0	0	0	0	0	0	0	0	0	0	0	0	0	0	0	0	0	0	0	0	0	0	0	0	0	0	0	0	0	0	0	0	0	0	0	0	0	0	0	0	0	0
M02Jul2013	0	0	0	0	0	0	0	0	0	0	0	0	0	0	0	0	0	0	0	0	0	0	0	0	0	0	0	0	0	0	0	0	0	0	0	0	0	0	0	0	0	0	0	0	0	0	0	0	0
M02Jul2013	0	0	0	0	0	0	0	0	0	0	0	0	0	0	0	0	0	0	0	0	0	0	0	0	0	0	0	0	0	0	0	0	0	0	0	0	0	0	0	0	0	0	0	0	0	0	0	0	0
M02Jul2013	0	0	0	0	0	0	0	0	0	0	0	0	0	0	0	0	0	0	0	0	0	0	0	0	0	0	0	0	0	0	0	0	0	0	0	0	0	0	0	0	0	0	0	0	0	0	0	0	0
M03Jul2013	0	0	0	0	0	0	0	0	0	0	0	0	0	0	0	0	0	0	0	0	0	0	0	0	0	0	0	0	0	0	0	0	0	0	0	0	0	0	0	0	0	0	0	0	0	0	0	0	0
M03Jul2013	0	0	0	0	0	0	0	0	0	0	0	0	0	0	0	0	0	0	0	0	0	0	0	0	0	0	0	0	0	0	0	0	0	0	0	0	0	0	0	0	0	0	0	0	0	0	0	0	0
M03Jul2013	0	0	0	0	0	0	0	0	0	0	0	0	0	0	0	0	0	0	0	0	0	0	0	0	0	0	0	0	0	0	0	0	0	0	0	0	0	0	0	0	0	0	0	0	0	0	0	0	0
M04Jul2013	0	0	0	0	0	0	0	0	0	0	0	0	0	0	0	0	0	0	0	0	0	0	0	0	0	0	0	0	0	0	0	0	0	0	0	0	0	0	0	0	0	0	0	0	0	0	0	0	0
M04Jul2013	0	0	0	0	0	0	0	0	0	0	0	0	0	0	0	0	0	0	0	0	0	0	0	0	0	0	0	0	0	0	0	0	0	0	0	0	0	0	0	0	0	0	0	0	0	0	0	0	0
M04Jul2013	0	0	0	0	0	0	0	0	0	0	0	0	0	0	0	0	0	0	0	0	0	0	0	0	0	0	0	0	0	0	0	0	0	0	0	0	0	0	0	0	0	0	0	0	0	0	0	0	0
M06Jul2013	0	0	0	0	0	0	0	0	0	0	0	0	0	0	0	0	0	0	0	2	0	0	0	0	0	0	0	0	0	0	0	0	0	0	0	0	0	0	1	0	0	0	0	0	0	0	0	0	0
M06Jul2013	0	0	0	0	0	0	0	0	0	0	0	0	0	0	0	0	0	0	0	1	0	0	0	0	0	0	0	0	0	0	0	0	0	0	0	0	0	0	0	0	0	0	0	0	0	0	0	0	0
M06Jul2013	0	0	0	0	0	0	0	0	0	0	0	0	0	0	0	0	0	0	0	0	0	0	0	0	0	0	0	0	0	0	0	0	0	0	0	0	0	0	0	0	0	0	0	0	0	0	0	0	0
M07Jul2013	0	0	0	0	0	0	0	0	0	0	0	0	0	0	0	2	0	0	0	3	0	0	0	0	0	0	0	0	0	0	0	0	0	0	0	0	0	0	1	0	0	0	0	0	0	0	0	0	0
M07Jul2013	0	0	0	0	0	0	5	0	0	0	1	0	0	0	0	3	0	0	0	7	0	0	0	0	0	0	0	0	0	1	0	0	0	0	0	0	0	0	0	0	0	0	0	0	0	0	0	0	0
M07Jul2013	0	0	0	0	0	0	1	0	0	0	0	0	0	0	0	4	0	0	0	12	0	0	0	0	0	0	0	0	0	1	0	0	0	0	0	0	0	0	2	0	0	0	0	0	0	0	0	0	0
M08Jul2013	0	0	0	0	0	0	0	0	0	0	0	0	0	0	0	0	0	0	0	2	0	0	0	0	0	0	0	0	0	6	0	0	0	0	0	0	0	0	1	0	4	0	0	0	0	0	0	0	0
M08Jul2013	0	0	0	0	0	0	3	0	0	0	0	0	0	0	0	0	0	0	0	1	0	0	0	0	0	0	0	0	0	1	0	0	0	0	0	0	0	0	0	0	1	0	0	0	0	0	0	0	0
M08Jul2013	0	0	0	0	0	0	1	0	0	0	0	0	0	0	0	2	0	0	0	1	0	0	0	0	0	0	0	0	0	1	0	0	0	0	0	0	0	0	0	0	1	0	0	0	0	0	0	0	0
M09Jul2013	0	1	0	0	0	1	0	0	0	0	0	0	0	0	0	0	0	0	0	0	0	0	0	0	0	0	0	0	0	0	0	0	0	0	0	0	0	0	0	0	0	0	0	0	0	0	0	0	1
M09Jul2013	0	0	0	0	0	0	0	0	0	0	0	0	0	0	0	0	0	0	0	0	0	0	0	0	0	0	0	0	0	0	0	0	0	0	0	0	0	0	0	0	0	0	0	0	0	0	0	0	0
M09Jul2013	0	0	0	0	0	0	1	0	0	0	0	0	0	0	0	2	0	0	0	0	0	0	0	0	0	0	0	0	0	3	0	0	0	0	0	0	0	0	0	0	0	0	0	0	0	0	0	0	0
M10Jul2013	0	0	0	0	0	0	13	0	0	0	0	0	0	0	0	4	0	0	0	0	0	0	0	0	0	0	0	0	0	21	0	0	0	0	0	0	0	0	0	0	0	0	0	0	0	0	0	0	0
M10Jul2013	0	0	0	0	0	0	11	0	0	0	0	0	0	0	0	4	0	0	0	0	0	0	0	0	0	0	0	0	0	7	0	0	0	0	0	0	0	1	0	0	0	0	0	0	0	0	0	0	0
M10Jul2013	0	0	0	0	0	0	5	0	0	0	0	0	0	0	0	2	0	0	0	0	0	0	0	0	0	0	0	0	0	4	0	0	0	0	0	0	0	0	0	0	0	0	0	0	0	0	0	0	0
M11Jul2013	0	0	0	0	0	0	1	0	0	0	0	0	0	0	0	0	0	0	0	0	0	0	0	0	0	0	0	0	0	0	0	0	0	0	1	0	0	0	0	0	0	0	0	0	0	0	0	0	0
M11Jul2013	0	0	0	0	0	0	0	0	0	0	0	0	0	0	0	3	0	0	0	0	0	0	0	0	0	0	0	0	0	2	0	0	0	0	0	0	0	0	0	0	0	0	0	0	0	0	0	0	0
M11Jul2013	0	0	0	0	0	0	1	0	0	0	0	0	0	0	0	0	0	0	0	0	0	0	0	0	0	0	0	0	0	0	0	0	0	0	0	0	0	0	0	0	0	0	0	0	0	0	0	0	0
M12Jul2013	0	0	0	0	0	0	3	0	0	0	0	0	0	0	0	0	0	0	0	0	0	0	0	0	0	0	0	0	0	51	0	0	0	0	0	0	0	0	0	0	0	0	0	0	0	0	0	0	0
M12Jul2013	0	3	0	0	0	0	0	0	0	0	0	0	0	0	0	0	0	0	0	0	0	0	0	0	0	0	0	0	0	25	0	0	0	0	0	0	0	0	0	0	0	0	0	0	0	0	0	0	0
M12Jul2013	0	1	0	0	0	0	0	0	0	0	0	0	0	0	0	0	0	0	0	0	0	0	0	0	0	0	0	0	0	18	0	0	0	0	0	0	0	0	0	0	0	0	0	0	0	0	0	0	0
M13Jul2013	0	0	0	0	0	0	0	0	0	0	0	0	0	0	0	0	0	0	0	0	0	0	0	0	0	0	0	0	0	0	1	0	0	0	0	0	0	0	0	0	0	0	0	0	0	0	0	0	0
M13Jul2013	0	0	0	0	0	0	0	0	0	0	0	0	0	0	0	1	0	0	0	0	0	0	0	0	0	0	0	0	0	0	1	0	0	1	0	0	0	0	0	0	0	0	0	0	0	0	0	0	0
M13Jul2013	0	0	0	0	0	0	1	0	0	0	0	0	0	0	0	0	0	0	0	0	0	0	0	0	0	0	0	0	0	0	0	0	0	0	0	0	0	0	0	0	0	0	0	0	0	0	0	0	0
M14Jul2013	0	0	0	0	0	0	0	0	0	0	0	0	0	0	0	0	0	0	0	0	0	0	0	0	0	0	0	0	0	0	0	0	0	0	0	0	0	0	0	0	0	0	0	0	0	0	0	0	0
M14Jul2013	0	0	0	0	0	0	0	0	0	0	0	0	0	0	0	0	0	0	0	0	0	0	0	0	0	0	0	0	0	0	0	0	0	0	0	0	0	0	0	0	0	0	0	0	0	0	0	0	0
M14Jul2013	0	0	0	0	0	0	0	0	0	0	0	0	0	0	0	0	0	0	0	0	0	0	0	0	0	0	0	0	0	0	0	0	0	0	0	0	0	0	0	0	0	0	0	0	0	0	0	0	0
M15Jul2013	0	0	0	0	0	0	0	0	0	0	0	0	0	0	0	0	0	0	0	0	0	0	0	0	0	0	0	0	0	0	0	0	0	0	0	0	0	0	0	0	0	0	0	0	0	0	0	0	0
M15Jul2013	0	0	0	0	0	0	0	0	0	0	0	0	0	0	0	0	0	0	0	0	0	0	0	0	0	0	0	0	0	0	0	0	0	0	0	0	0	0	0	0	0	0	0	0	0	0	0	0	0
M15Jul2013	0	0	0	0	0	0	0	0	0	0	0	0	0	0	0	0	0	0	0	0	0	0	0	0	0	0	0	0	0	0	0	0	0	0	0	0	0	0	0	0	0	0	0	0	0	0	0	0	0
M01Oct2013	0	0	0	0	0	0	0	0	0	0	0	0	0	0	0	0	0	0	0	0	0	0	0	0	0	0	0	0	0	0	0	0	0	0	0	0	0	0	0	0	0	0	0	0	0	0	0	0	0
M01Oct2013	0	0	0	0	0	0	0	0	0	0	0	0	0	0	0	0	0	0	0	0	0	0	0	0	0	0	0	0	0	0	0	0	0	0	0	0	0	0	0	0	0	0	0	0	0	0	0	0	0
M01Oct2013	0	0	0	0	0	0	0	0	0	0	0	0	0	0	0	0	0	0	0	0	0	0	0	0	0	0	0	0	0	0	0	0	0	0	0	0	0	0	0	0	0	0	0	0	0	0	0	0	0
M02Oct2013	0	0	0	0	0	0	0	0	0	0	0	0	0	0	0	0	0	0	0	0	0	0	0	0	0	0	0	0	0	0	0	0	0	0	0	0	0	0	0	0	0	0	0	0	0	0	0	0	0
M02Oct2013	0	0	0	0	0	0	0	0	0	0	0	0	0	0	0	0	0	0	0	0	0	0	0	0	0	0	0	0	0	0	0	0	0	0	0	0	0	0	0	0	0	0	0	0	0	0	0	0	0
M02Oct2013	0	0	0	0	0	0	0	0	0	0	0	0	0	0	0	0	0	0	0	0	0	0	0	0	0	0	0	0	0	0	0	0	0	0	0	0	0	0	0	0	0	0	0	0	0	0	0	0	0
M04Oct2013	0	0	0	0	0	0	0	0	0	0	0	0	0	0	0	0	0	0	0	0	0	0	0	0	0	0	0	0	0	0	0	0	0	0	0	0	0	0	0	0	0	0	0	0	0	0	0	0	0
M04Oct2013	0	0	0	0	0	0	0	0	0	0	0	0	0	0	0	0	0	0	0	0	0	0	0	0	0	0	0	0	0	0	0	0	0	0	0	0	0	0	0	0	0	0	0	0	0	0	0	0	0
M04Oct2013	0	0	0	0	0	0	0	0	0	0	0	0	0	0	0	0	0	0	0	0	0	0	0	0	0	0	0	0	0	0	0	0	0	0	0	0	0	0	0	0	0	0	0	0	0	0	0	0	0
M05Oct2013	0	0	0	0	0	0	0	0	0	0	0	0	0	0	0	0	0	0	0	0	0	0	0	0	0	0	0	0	0	0	0	0	0	0	0	0	0	0	0	0	0	0	0	0	0	0	0	0	0
M05Oct2013	0	0	0	0	0	0	0	0	0	0	0	0	0	0	0	0	0	0	0	0	0	0	0	0	0	0	0	0	0	0	0	0	0	0	0	0	0	0	0	0	0	0	0	0	0	0	0	0	0
M05Oct2013	0	0	0	0	0	0	0	0	0	0	0	0	0	0	0	0	0	0	0	0	0	0	0	0	0	0	0	0	0	0	0	0	0	0	0	0	0	0	0	0	0	0	0	0	0	0	0	0	0
M06Oct2013	0	0	0	0	0	0	0	0	0	0	0	0	0	0	0	0	0	0	0	1	0	0	0	0	0	0	0	0	0	0	0	0	0	0	0	0	0	0	0	0	0	0	0	0	0	0	0	0	0
M06Oct2013	0	0	0	0	0	0	0	0	0	0	0	0	0	0	0	0	0	0	0	3	0	0	0	0	0	0	0	0	0	0	0	0	0	0	0	0	0	0	0	0	0	0	0	0	0	0	0	0	0
M06Oct2013	0	0	0	0	0	0	0	0	0	0	0	0	0	0	0	0	0	0	0	4	0	0	0	0	0	0	0	0	0	0	0	0	0	0	0	0	0	0	0	0	0	0	0	0	0	0	0	0	0
M07Oct2013	0	1	0	0	0	0	1	0	0	0	1	0	0	0	0	0	0	0	0	3	0	0	0	0	0	0	0	0	0	2	0	0	0	0	0	0	0	0	0	0	0	0	0	0	0	0	0	0	0
M07Oct2013	0	0	0	0	0	0	0	0	0	0	1	0	0	0	0	0	0	0	0	0	0	0	0	0	0	0	0	0	0	1	0	0	0	0	0	0	0	0	0	0	0	0	0	0	0	0	0	0	0
M07Oct2013	0	0	0	0	0	0	1	0	0	0	1	0	0	0	0	0	0	0	0	3	0	0	0	0	0	0	0	0	0	4	0	0	0	0	0	0	0	0	0	0	0	0	0	0	0	0	0	0	0
M08Oct2013	0	0	0	0	0	0	3	0	0	0	0	0	0	0	0	0	0	0	0	0	0	0	0	0	0	0	0	0	0	0	0	0	0	0	0	0	0	0	0	0	0	0	0	0	0	0	0	0	0
M08Oct2013	0	0	0	0	0	0	1	0	0	0	0	0	0	0	0	0	0	0	0	0	0	0	0	0	0	0	0	0	0	0	0	0	0	0	0	0	0	0	0	0	0	0	0	0	0	0	0	0	0
M08Oct2013	0	0	0	0	0	0	0	0	0	0	0	0	0	0	0	0	0	0	0	0	0	0	0	0	0	0	0	0	0	0	0	0	0	0	0	0	0	0	0	0	0	0	0	0	0	0	0	0	0
M09Oct2013	0	0	0	0	0	0	0	0	0	0	0	0	0	0	0	0	0	0	0	0	0	0	0	0	0	0	0	0	0	0	0	0	0	0	0	0	0	0	0	0	0	0	0	0	0	0	0	0	0
M09Oct2013	0	0	0	0	0	0	3	0	0	0	0	0	0	0	0	0	0	0	0	0	0	0	0	0	0	0	0	0	0	1	0	0	0	0	0	0	0	0	0	0	0	0	0	0	0	0	0	0	0
M09Oct2013	0	0	0	0	0	0	2	0	0	0	0	0	0	0	0	0	0	0	0	0	0	0	0	0	0	0	0	0	0	4	0	0	0	0	0	0	0	0	0	0	0	0	0	0	0	0	0	0	0
M10Oct2013	0	0	0	0	0	0	5	0	0	0	0	0	0	0	0	1	0	0	0	1	0	0	0	0	0	0	0	0	0	1	0	0	0	0	0	0	0	0	0	0	0	0	0	0	0	0	0	0	0
M10Oct2013	0	0	0	0	0	0	4	0	0	0	0	0	0	0	0	0	0	0	0	0	0	0	0	0	0	0	0	1	0	0	0	0	0	0	0	0	0	0	0	0	0	0	0	0	0	0	0	0	0
M10Oct2013	0	0	0	0	0	0	10	0	0	0	0	0	0	0	0	0	0	0	0	2	0	0	0	0	0	0	0	0	0	4	0	0	0	0	0	0	0	0	0	0	0	0	0	0	0	0	0	0	0
M11Oct2013	0	0	0	0	0	0	0	0	0	0	1	0	0	0	0	0	0	0	0	2	0	0	0	0	0	0	0	0	0	2	0	0	0	0	0	0	0	0	0	0	0	0	0	0	0	0	0	0	0
M11Oct2013	0	0	0	0	0	0	0	0	0	0	1	0	0	0	0	0	0	0	0	5	0	0	0	0	0	0	0	0	0	1	0	0	0	0	0	0	0	0	0	0	0	0	0	0	0	0	0	0	0
M11Oct2013	0	0	0	0	0	0	0	0	0	0	2	0	0	0	0	0	0	0	0	15	0	0	0	0	0	0	0	0	0	0	0	0	0	0	0	0	0	0	0	0	0	0	0	0	0	0	0	0	0
M12Oct2013	0	0	0	0	0	0	0	0	0	0	0	0	0	0	0	0	0	0	0	0	0	0	0	0	0	0	0	0	0	1	0	0	0	0	0	0	0	0	0	0	0	0	0	0	0	0	0	0	0
M12Oct2013	0	0	0	0	0	0	0	0	0	0	0	0	0	0	0	0	0	0	0	0	0	0	0	0	0	0	0	0	0	14	0	0	0	0	0	0	0	0	0	0	0	0	0	0	0	0	0	0	0
M12Oct2013	0	1	0	0	0	0	1	0	0	0	0	0	0	0	0	0	0	0	0	0	0	0	0	0	0	0	0	0	0	17	0	0	0	0	0	0	0	0	0	0	0	0	0	0	0	0	0	0	0
M13Oct2013	0	0	0	0	0	0	1	0	0	0	0	0	0	0	0	0	0	0	0	0	0	0	0	0	0	0	0	0	0	0	0	0	0	0	0	0	0	0	0	0	0	0	0	0	0	0	0	0	0
M13Oct2013	0	0	0	0	0	0	0	0	0	0	0	0	0	0	0	1	0	0	0	0	0	0	0	0	0	0	0	0	0	1	0	0	0	0	0	0	0	0	0	0	0	0	0	0	0	0	0	0	0
M13Oct2013	0	0	0	0	0	0	0	0	0	0	0	0	0	0	0	0	0	0	0	0	0	0	0	0	0	0	0	0	0	1	0	0	0	0	0	0	0	0	0	0	0	0	0	0	0	0	0	0	0
M14Oct2013	0	0	0	0	0	0	0	0	0	0	0	0	0	0	0	0	0	0	0	0	0	0	0	0	0	0	0	0	0	0	0	0	0	0	0	0	0	0	0	0	0	0	0	0	0	0	0	0	0
M14Oct2013	0	0	0	0	0	0	0	0	0	0	0	0	0	0	0	0	0	0	0	0	0	0	0	0	0	0	0	0	0	0	0	0	0	0	0	0	0	0	0	0	0	0	0	0	0	0	0	0	0
M14Oct2013	0	0	0	0	0	0	0	0	0	0	0	0	0	0	0	0	0	0	0	0	0	0	0	0	0	0	0	0	0	0	0	0	0	0	0	0	0	0	0	0	0	0	0	0	0	0	0	0	0
M11Jan2014	0	0	0	0	0	0	1	0	0	0	0	0	0	0	0	1	0	0	0	1	0	0	0	0	0	0	0	2	0	1	0	0	0	0	0	0	0	0	0	0	0	0	0	0	0	0	0	0	0
M11Jan2014	0	0	0	0	0	0	0	0	0	0	0	0	0	0	0	1	0	0	0	0	0	0	0	0	0	0	0	0	0	1	0	0	0	0	0	0	0	0	0	0	0	0	0	0	0	0	0	0	0
M11Jan2014	0	0	0	0	0	0	0	0	0	0	0	0	0	0	0	0	0	0	0	0	0	0	0	0	0	0	0	1	0	0	0	0	0	0	0	0	0	0	0	0	3	0	0	0	0	0	0	0	0
M12Jan2014	0	0	0	0	0	0	1	0	0	0	0	0	0	0	0	0	0	0	0	0	0	0	0	0	0	0	0	0	0	11	0	0	0	0	0	0	0	0	0	0	0	0	0	0	0	0	0	0	0
M12Jan2014	0	0	0	0	0	0	0	0	0	0	0	0	0	0	0	0	0	0	0	0	0	0	0	0	0	0	0	0	0	1	0	0	0	0	0	0	0	0	0	0	0	0	0	0	0	0	0	0	0
M12Jan2014	0	0	0	0	0	0	0	0	0	0	0	0	0	0	0	0	0	0	0	0	0	0	0	0	0	0	0	2	0	0	0	0	0	0	0	0	0	0	0	0	0	0	0	0	0	0	0	0	0
M14Jan2014	0	0	0	0	0	0	0	0	0	0	0	0	0	0	0	0	0	0	0	0	0	0	0	0	0	0	0	0	0	0	0	0	0	0	0	0	0	0	0	0	0	0	0	0	0	0	0	0	0
M14Jan2014	0	0	0	0	0	0	0	0	0	0	0	0	0	0	0	0	0	0	0	0	0	0	0	0	0	0	0	0	0	0	0	0	0	0	0	0	0	0	0	0	0	0	0	0	0	0	0	0	0
M14Jan2014	0	0	0	0	0	0	0	0	0	0	0	0	0	0	0	0	0	0	0	0	0	0	0	0	0	0	0	0	0	0	0	0	0	0	0	0	0	0	0	0	0	0	0	0	0	0	0	0	0
M01Apr2014	0	0	0	0	0	0	0	0	0	0	0	0	0	0	0	0	0	0	0	0	0	0	0	0	0	0	0	0	0	0	0	0	0	0	0	0	0	0	0	0	0	0	0	0	0	0	0	0	0
M01Apr2014	0	0	0	0	0	0	0	0	0	0	0	0	0	0	0	0	0	0	0	0	0	0	0	0	0	0	0	0	0	0	0	0	0	0	0	0	0	0	0	0	0	0	0	0	0	0	0	0	0
M01Apr2014	0	0	0	0	0	0	0	0	0	0	0	0	0	0	0	0	0	0	0	0	0	0	0	0	0	0	0	0	0	0	0	0	0	0	0	0	0	0	0	0	0	0	0	0	0	0	0	0	0
M03Apr2014	0	0	0	0	0	0	0	0	0	0	0	0	0	0	0	0	0	0	0	0	0	0	0	0	0	0	0	0	0	0	0	0	0	0	0	0	0	0	0	0	0	0	0	0	0	0	0	0	0
M03Apr2014	0	0	0	0	0	0	0	0	0	0	0	0	0	0	0	0	0	0	0	0	0	0	0	0	0	0	0	0	0	0	0	0	0	0	0	0	0	0	0	0	0	0	0	0	0	0	0	0	0
M03Apr2014	0	0	0	0	0	0	0	0	0	0	0	0	0	0	0	0	0	0	0	0	0	0	0	0	0	0	0	0	0	0	0	0	0	0	0	0	0	0	0	0	0	0	0	0	0	0	0	0	0
M04Apr2014	0	0	0	0	0	0	0	0	0	0	0	0	0	0	0	0	0	0	0	0	0	0	0	0	0	0	0	0	0	0	0	0	0	0	0	0	0	0	0	0	0	0	0	0	0	0	0	0	0
M04Apr2014	0	0	0	0	0	0	0	0	0	0	0	0	0	0	0	0	0	0	0	0	0	0	0	0	0	0	0	0	0	0	0	0	0	0	0	0	0	0	0	0	0	0	0	0	0	0	0	0	0
M04Apr2014	0	0	0	0	0	0	0	0	0	0	0	0	0	0	0	0	0	0	0	0	0	0	0	0	0	0	0	0	0	0	0	0	0	0	0	0	0	0	0	0	0	0	0	0	0	0	0	0	0
M05Apr2014	0	0	0	0	0	0	0	0	0	0	0	0	0	0	0	0	0	0	0	0	0	0	0	0	0	0	0	0	0	0	0	0	0	0	0	0	0	0	0	0	0	0	0	0	0	0	0	0	0
M05Apr2014	0	0	0	0	0	0	0	0	0	0	0	0	0	0	0	0	0	0	0	0	0	0	0	0	0	0	0	0	0	0	0	0	0	0	0	0	0	0	0	0	0	0	0	0	0	0	0	0	0
M05Apr2014	0	0	0	0	0	0	0	0	0	0	0	0	0	0	0	0	0	0	0	0	0	0	0	0	0	0	0	0	0	0	0	0	0	0	0	0	0	0	0	0	0	0	0	0	0	0	0	0	0
M06Apr2014	0	0	0	0	0	0	0	0	0	0	0	0	0	0	0	0	0	0	0	0	0	0	0	0	0	0	0	0	0	0	0	0	0	0	0	0	0	0	0	0	0	0	0	0	0	0	0	0	0
M06Apr2014	0	0	0	0	0	0	0	0	0	0	0	0	0	0	0	0	0	0	0	0	0	0	0	0	0	0	0	0	0	0	0	0	0	0	0	0	0	0	0	0	0	0	0	0	0	0	0	0	0
M06Apr2014	0	0	0	0	0	0	0	0	0	0	0	0	0	0	0	0	0	0	0	0	0	0	0	0	0	0	0	0	0	0	0	0	0	0	0	0	0	0	0	0	0	0	0	0	0	0	0	0	0
M07Apr2014	0	0	0	0	0	0	0	0	0	0	0	0	0	0	0	0	0	0	0	0	0	0	0	0	0	0	0	0	0	0	0	0	0	0	0	0	0	0	4	0	0	0	0	0	0	0	0	0	0
M07Apr2014	0	0	0	0	0	0	0	0	0	0	0	0	0	0	0	0	0	0	0	0	0	0	0	0	0	0	0	0	0	2	0	0	0	0	0	0	0	0	1	0	0	0	0	0	0	0	0	0	0
M07Apr2014	0	0	0	0	0	0	0	0	0	0	0	0	0	0	0	0	0	0	0	0	0	0	0	0	0	0	0	1	0	0	0	0	0	0	0	0	0	0	1	0	0	0	0	0	0	0	0	0	0
M09Apr2014	0	2	0	0	0	0	0	0	0	0	0	0	0	0	0	1	0	0	0	0	0	0	0	0	0	0	0	0	0	1	0	0	0	0	0	0	0	0	1	0	0	0	0	0	0	0	0	0	0
M09Apr2014	0	1	0	0	0	0	0	0	0	0	0	0	0	0	0	0	0	0	0	0	0	0	0	0	0	0	0	0	0	0	0	0	0	0	0	0	0	0	1	0	0	0	0	0	0	0	0	0	0
M09Apr2014	0	0	0	0	0	0	0	0	0	0	0	0	0	0	0	0	0	0	0	0	0	0	0	0	0	0	0	0	0	0	0	0	0	0	0	0	0	0	0	0	0	0	0	0	0	0	0	0	0
M11Apr2014	0	0	0	0	0	0	0	0	0	0	0	0	0	0	0	0	0	0	0	0	0	0	0	0	0	0	0	5	0	2	0	0	0	0	0	0	0	0	3	0	1	0	0	0	0	0	0	0	0
M11Apr2014	0	0	0	0	0	0	0	0	0	0	0	0	0	0	0	0	0	0	0	0	0	0	0	0	0	0	0	2	0	7	0	0	0	0	0	0	0	0	2	0	2	0	0	0	0	0	0	0	0
M11Apr2014	0	0	0	0	0	0	2	0	0	0	0	0	0	0	0	0	0	0	0	0	0	0	0	0	0	0	0	2	0	0	0	0	0	0	0	0	0	0	2	0	2	0	0	0	0	0	0	0	0
M14Apr2014	0	0	0	0	0	0	0	0	0	0	0	0	0	0	0	0	0	0	0	0	0	0	0	0	0	0	0	0	0	0	0	0	0	0	0	0	0	0	0	0	0	0	0	0	0	0	0	0	0
M14Apr2014	0	0	0	0	0	0	0	0	0	0	0	0	0	0	0	0	0	0	0	0	0	0	0	0	0	0	0	0	0	0	0	0	0	0	0	0	0	0	0	0	0	0	0	0	0	0	0	0	0
M14Apr2014	0	0	0	0	0	0	0	0	0	0	0	0	0	0	0	0	0	0	0	0	0	0	0	0	0	0	0	0	0	0	0	0	0	0	0	0	0	0	0	0	0	0	0	0	0	0	0	0	0
M01Jul2014	0	0	0	0	0	0	0	0	0	0	0	0	0	0	0	0	0	0	0	0	0	0	0	0	0	0	0	0	0	0	0	0	0	0	0	0	0	0	0	0	0	0	0	0	0	0	0	0	0
M01Jul2014	0	0	0	0	0	0	0	0	0	0	0	0	0	0	0	0	0	0	0	0	0	0	0	0	0	0	0	0	0	0	0	0	0	0	0	0	0	0	0	0	0	0	0	0	0	0	0	0	0
M01Jul2014	0	0	0	0	0	0	0	0	0	0	0	0	0	0	0	0	0	0	0	0	0	0	0	0	0	0	0	0	0	0	0	0	0	0	0	0	0	0	0	0	0	0	0	0	0	0	0	0	0
M03Jul2014	0	0	0	0	0	0	0	0	0	0	0	0	0	0	0	0	0	0	0	0	0	0	0	0	0	0	0	0	0	0	0	0	0	0	0	0	0	0	0	0	0	0	0	0	0	0	0	0	0
M03Jul2014	0	0	0	0	0	0	0	0	0	0	0	0	0	0	0	0	0	0	0	0	0	0	0	0	0	0	0	0	0	0	0	0	0	0	0	0	0	0	0	0	0	0	0	0	0	0	0	0	0
M03Jul2014	0	0	0	0	0	0	0	0	0	0	0	0	0	0	0	0	0	0	0	0	0	0	0	0	0	0	0	0	0	0	0	0	0	0	0	0	0	0	0	0	0	0	0	0	0	0	0	0	0
M04Jul2014	0	0	0	0	0	0	0	0	0	0	0	0	0	0	0	0	0	0	0	0	0	0	0	0	0	0	0	0	0	0	0	0	0	0	0	0	0	0	0	0	0	0	0	0	0	0	0	0	0
M04Jul2014	0	0	0	0	0	0	0	0	0	0	0	0	0	0	0	0	0	0	0	0	0	0	0	0	0	0	0	0	0	0	0	0	0	0	0	0	0	0	0	0	0	0	0	0	0	0	0	0	0
M04Jul2014	0	0	0	0	0	0	0	0	0	0	0	0	0	0	0	0	0	0	0	0	0	0	0	0	0	0	0	0	0	0	0	0	0	0	0	0	0	0	0	0	0	0	0	0	0	0	0	0	0
M05Jul2014	0	0	0	0	0	0	0	0	0	0	0	0	0	0	0	0	0	0	0	0	0	0	0	0	0	0	0	0	0	0	0	0	0	0	0	0	0	0	0	0	0	0	0	0	0	0	0	0	0
M05Jul2014	0	0	0	0	0	0	0	0	0	0	0	0	0	0	0	0	0	0	0	0	0	0	0	0	0	0	0	0	0	0	0	0	0	0	0	0	0	0	0	0	0	0	0	0	0	0	0	0	0
M05Jul2014	0	0	0	0	0	0	0	0	0	0	0	0	0	0	0	0	0	0	0	0	0	0	0	0	0	0	0	0	0	0	0	0	0	0	0	0	0	0	0	0	0	0	0	0	0	0	0	0	0
M07Jul2014	0	0	0	0	0	0	0	0	0	0	0	0	0	0	0	0	0	0	0	0	0	0	0	0	0	0	0	0	0	1	0	0	0	0	0	0	0	0	0	0	0	1	0	0	0	0	0	0	0
M07Jul2014	0	0	0	0	0	0	0	0	0	0	0	0	0	0	0	0	0	0	0	0	0	0	0	0	0	0	0	0	0	1	0	0	0	0	0	0	0	0	0	0	0	0	0	0	0	0	0	0	0
M07Jul2014	0	0	0	0	0	0	0	0	0	0	0	0	0	0	0	0	0	0	0	0	0	0	0	0	0	0	0	0	0	5	0	0	0	0	0	0	0	0	0	0	0	0	0	0	0	0	0	0	0
M09Jul2014	0	0	0	0	0	0	0	0	0	0	1	0	0	0	0	0	0	0	0	0	0	0	0	0	0	0	0	1	0	4	0	1	0	0	0	0	0	0	0	0	0	0	0	0	0	0	0	0	0
M09Jul2014	0	0	1	0	0	0	0	0	0	0	0	0	0	0	0	0	0	0	0	0	0	0	0	0	0	0	0	0	0	1	0	0	0	0	0	0	0	0	0	0	0	0	0	0	0	0	0	0	0
M09Jul2014	0	0	0	0	0	0	0	0	0	0	3	0	0	0	0	0	0	0	0	0	0	0	0	0	0	0	0	0	0	1	0	0	0	0	0	0	0	0	1	0	0	0	0	0	0	0	0	0	0
M11Jul2014	0	0	0	0	0	0	0	0	0	0	0	0	0	0	0	0	0	0	0	0	0	0	0	0	0	0	0	0	0	7	0	0	0	0	0	2	0	0	0	0	0	0	0	0	0	0	0	0	0
M11Jul2014	0	0	0	0	0	0	0	0	0	0	2	0	0	0	0	0	0	0	0	0	0	0	0	0	0	0	0	0	0	5	0	0	0	0	0	0	0	0	0	0	0	0	0	0	0	0	0	0	0
M11Jul2014	0	0	0	0	0	0	0	0	0	0	0	0	0	0	0	0	0	0	0	0	0	0	0	0	0	0	0	0	0	7	0	0	0	0	0	0	0	0	0	0	0	0	0	0	0	0	0	0	0
M14Jul2014	0	0	0	0	0	0	0	0	0	0	0	0	0	0	0	0	0	0	0	0	0	0	0	0	0	0	0	0	0	0	0	0	0	0	0	0	0	0	0	0	0	0	0	0	0	0	0	0	0
M14Jul2014	0	0	0	0	0	0	0	0	0	0	0	0	0	0	0	0	0	0	0	0	0	0	0	0	0	0	0	0	0	0	0	0	0	0	0	0	0	0	0	0	0	0	0	0	0	0	0	0	0
M14Jul2014	0	0	0	0	0	0	0	0	0	0	0	0	0	0	0	0	0	0	0	0	0	0	0	0	0	0	0	0	0	0	0	0	0	0	0	0	0	0	0	0	0	0	0	0	0	0	0	0	0
[truncated: 88 more columns]

## Sheet: Mulinia
	Mulinia lateralis
M02Apr2007	14
M02Apr2007	17
M02Apr2007	7
M03Apr2007	9
M03Apr2007	39
[truncated: 1,024 more rows]
